# Supplementary material for: Metabolic reprogramming involving glycolysis in the hibernating brown bear skeletal muscle
Source: Front Zool. 2019 May 6;16:12. doi: 10.1186/s12983-019-0312-2 (PMC6503430; doi:10.1186/s12983-019-0312-2)
Supplement: Supplementary file 1 — Table S1. List of vastus lateralis proteins analysed in hibernating (winter) and active (summer) brown bears (Ursus arctos) using a MS-based strategy. (XLSX 4373 kb) [file 12983_2019_312_MOESM1_ESM.xlsx]

## Sheet: Identification
Metabolic reprogramming involving glycolysis in the hibernating brown bear skeletal muscle
Blandine Chazarin1,10, Kenneth B. Storey2, Anna Ziemianin1,10, Stéphanie Chanon3, Marine Plumel1, Isabelle Chery1, Christine Durand3, Alina Evans4, Jon M. Arnemo4,5, Andreas Zedrosser6,7, Jon E. Swenson8,9, Guillemette Gauquelin-Koch10, Chantal Simon3, Stephane Blanc1, Etienne Lefai3,11, and Fabrice Bertile1,*
1 Université de Strasbourg, CNRS, IPHC UMR 7178, Strasbourg F-670000, France 2 Department of Biology, Carleton University, Ottawa ON K1S 5B6, Canada. 3 CarMen Laboratory, INSERM 1060, INRA 1397, University of Lyon, Oullins F-69600, France 4 Department of Forestry and Wildlife Management, Inland Norway University of Applied Sciences, Campus Evenstad, Koppang NO-2480, Norway 5 Department of Wildlif…
* Correspondence: fbertile@unistra.fr (F. Bertile)
Supplementary Table S2a. List of vastus lateralis proteins identified in hibernating (winter) and active (summer) brown bears (Ursus arctos) using a MS-based strategy.
Inj Rep: Injection replicate; Prep Rep: Preparation replicate
	Protein identification using Andromeda search engine																															Retrieving of human homologues identifiers using Fasta program (v36; http://fasta.bioch.virginia.edu/fasta_www2/fasta_down.shtml; UniprotKb human database, TaxId 9606)						Manual verification of correspondences between Bear Leading proteins and BLAST Fasta 36 results	Quantification with MaxQuant (LFQ intensities) in active bears (Summer)
																																							Bear Id: W1209 Prep rep 1 Inj Rep 1	Bear Id: W1209 Prep rep 1 Inj Rep 2	Bear Id: W1209 Prep rep 2 Inj Rep 1	Bear Id: W1209 Prep rep 2 Inj Rep 2	Bear Id: W1104 Prep rep 1 Inj Rep 1	Bear Id: W1104 Prep rep 1 Inj Rep 2	Bear Id: W1104 Prep rep 2 Inj Rep 1	Bear Id: W1104 Prep rep 2 Inj Rep 2	Bear Id: W1202 Prep rep 1 Inj Rep 1	Bear Id: W1202 Prep rep 1 Inj Rep 2	Bear Id: W1202 Prep rep 2 Inj Rep 1
N° ID	Leading protein ID	Majority protein IDs	Protein IDs	Leading protein Description	Fasta headers	Leading protein Gene names	Peptide counts (all)	Peptide counts (razor+unique)	Peptide counts (unique)	Number of proteins	Peptides	Razor + unique peptides	Unique peptides	Sequence coverage [%]	Mol. weight [kDa]	Sequence length	Sequence lengths	Q-value	Score	Only identified by site	Reverse	Potential contaminant	id	Peptide IDs	Peptide is razor	Mod. peptide IDs	Evidence IDs	MS/MS IDs	Best MS/MS	Oxidation (M) site IDs	Oxidation (M) site positions	Uniprot identifier (Human)	Gene name (Human)	Description (Human)	Score (Human)	Identity (Human)	Similarity (Human)	Verification	LFQ intensity S_8_1_1	LFQ intensity S_8_1_2	LFQ intensity S_8_2_1	LFQ intensity S_8_2_2	LFQ intensity S_9_1_1	LFQ intensity S_9_1_2	LFQ intensity S_9_2_1	LFQ intensity S_9_2_2	LFQ intensity S_10_1_1	LFQ intensity S_10_1_2	LFQ intensity S_10_2_1
1	C6GZC1	C6GZC1;C6GZA6;T2DIG5;K7NDN1;K7ND24;D3YM32;D3YLZ3;D3YLW7;C6H0A7;C6H094;C6H055;C6H042;C6GZS5;C6GZR2;C6GZN6;C6GZJ7;C6GZH1;C6GZD2;C6GZ93;B6CTY1;B6CMH4;B5B8G0;B4XAL1;B3F2Y9;A8QW59;A4KVU6;A0A060N7C3;A0A060N6W1;A0A060N409;A0A060N3Q3;A0A060N2Y7;A1XJ52;A0A060N3B3;Q8SJJ7;Q8SJI5;Q8SJH3;Q8LWM1;Q3L6Q2;I7A472;I7A3V4;C6H016;B5B8I6;B5B8E7;A8QWB1;A8QWA8;A8QW85;A8QW72;A7DXU9;A5JFJ8;A0A0F7R526;A0A0B4RW92;A0A0B4RVZ0…	C6GZC1;C6GZA6;T2DIG5;K7NDN1;K7ND24;D3YM32;D3YLZ3;D3YLW7;C6H0A7;C6H094;C6H055;C6H042;C6GZS5;C6GZR2;C6GZN6;C6GZJ7;C6GZH1;C6GZD2;C6GZ93;B6CTY1;B6CMH4;B5B8G0;B4XAL1;B3F2Y9;A8QW59;A4KVU6;A0A060N7C3;A0A060N6W1;A0A060N409;A0A060N3Q3;A0A060N2Y7;A1XJ52;A0A060N3B3;Q8SJJ7;Q8SJI5;Q8SJH3;Q8LWM1;Q3L6Q2;I7A472;I7A3V4;C6H016;B5B8I6;B5B8E7;A8QWB1;A8QWA8;A8QW85;A8QW72;A7DXU9;A5JFJ8;A0A0F7R526;A0A0B4RW92;A0A0B4RVZ0…	Cytochrome c oxidase subunit 1	tr|C6GZC1|C6GZC1_URSSP Cytochrome c oxidase subunit 1 OS=Ursus spelaeus (Cave bear) GN=COI PE=3 SV=1;tr|C6GZA6|C6GZA6_URSSP Cytochrome c oxidase subunit 1 OS=Ursus spelaeus (Cave bear) GN=COI PE=3 SV=1;tr|T2DIG5|T2DIG5_9CARN Cytochrome c oxidase subunit	COI	3;3;3;3;3;3;3;3;3;3;3;3;3;3;3;3;3;3;3;3;3;3;3;3;3;3;3;3;3;3;3;2;2;2;2;2;2;2;2;2;2;2;2;2;2;2;2;2;2;2;2;2;2;2;2;1;1	3;3;3;3;3;3;3;3;3;3;3;3;3;3;3;3;3;3;3;3;3;3;3;3;3;3;3;3;3;3;3;2;2;2;2;2;2;2;2;2;2;2;2;2;2;2;2;2;2;2;2;2;2;2;2;1;1	3;3;3;3;3;3;3;3;3;3;3;3;3;3;3;3;3;3;3;3;3;3;3;3;3;3;3;3;3;3;3;2;2;2;2;2;2;2;2;2;2;2;2;2;2;2;2;2;2;2;2;2;2;2;2;1;1	57	3	3	3	11	45.605	509	509;509;514;514;514;514;514;514;514;514;514;514;514;514;514;514;514;514;514;514;514;514;514;514;514;514;514;514;514;514;514;514;514;514;514;514;514;514;514;514;514;514;514;514;514;514;514;514;514;514;514;514;514;514;514;196;514	0	35.177				1	2359;8884;9715	True;True;True	2518;9622;10508	153312;153313;153314;153315;153316;153317;153318;153319;153320;153321;153322;153323;153324;153325;153326;613168;613169;613170;613171;613172;613173;613174;613175;613176;613177;613178;613179;613180;613181;613182;613183;613184;613185;613186;613187;613188;613189;613190;613191;613192;613193;613194;613195;613196;613197;613198;613199;613200;613201;613202;613203;613204;613205;613206;613207;613208;613209;…	281457;281458;281459;281460;281461;281462;281463;281464;281465;281466;281467;281468;281469;281470;281471;1112959;1112960;1112961;1112962;1112963;1112964;1112965;1112966;1112967;1112968;1112969;1112970;1112971;1112972;1112973;1112974;1112975;1112976;1112977;1112978;1112979;1112980;1112981;1112982;1112983;1112984;1112985;1112986;1112987;1112988;1112989;1112990;1112991;1112992;1112993;1112994;111299…	281471;1112983;1227726			P00395	COX1_HUMAN	Cytochrome c oxidase subunit 1 OS=Homo sapiens (Human) GN=MT-CO1 PE=1 SV=1	0	0.759	0.812	ok	214730	217680	70865	84336	83450	86367	140490	139300	108110	64048	207300
2	Q8SJG5	Q8SJG5;K7NFL4;K7NF13;D3YM40;D3YM01;D3YLX5;D3YLW2;B6CTY9;A0A060N8E5;A0A060N7W0;A0A060N7C1;A0A060N3N1;A0A060N3H1;C6H0E0;C6H0C8;C6H037;C6H024;C6GZK5;C6GZH9;C6GZG6;B6CMI2;Q8SJH7;Q8LWL8;K7NG15;K7NEH9;K7NDA7;D3YM27;A0A060N804;A0A060N736;A0A060N3A9;A0A060N206;T2DJZ1;C6H0A2;C6H063;C6GZZ8;C6GZW1;C6GZT3;C6GZS0;C6GZP4;C6GZC9;C6GZB4;B5B8G8	Q8SJG5;K7NFL4;K7NF13;D3YM40;D3YM01;D3YLX5;D3YLW2;B6CTY9;A0A060N8E5;A0A060N7W0;A0A060N7C1;A0A060N3N1;A0A060N3H1;C6H0E0;C6H0C8;C6H037;C6H024;C6GZK5;C6GZH9;C6GZG6;B6CMI2;Q8SJH7;Q8LWL8;K7NG15;K7NEH9;K7NDA7;D3YM27;A0A060N804;A0A060N736;A0A060N3A9;A0A060N206;T2DJZ1;C6H0A2;C6H063;C6GZZ8;C6GZW1;C6GZT3;C6GZS0;C6GZP4;C6GZC9;C6GZB4;B5B8G8	NADH-ubiquinone oxidoreductase chain 5	tr|Q8SJG5|Q8SJG5_URSMA NADH-ubiquinone oxidoreductase chain 5 OS=Ursus maritimus (Polar bear) (Thalarctos maritimus) GN=ND5 PE=3 SV=1;tr|K7NFL4|K7NFL4_URSAR NADH-ubiquinone oxidoreductase chain 5 OS=Ursus arctos (Brown bear) (Grizzly bear) GN=nad5 PE=3 S	ND5	2;2;2;2;2;2;2;2;2;2;2;2;2;2;2;2;2;2;2;2;2;1;1;1;1;1;1;1;1;1;1;1;1;1;1;1;1;1;1;1;1;1	2;2;2;2;2;2;2;2;2;2;2;2;2;2;2;2;2;2;2;2;2;1;1;1;1;1;1;1;1;1;1;1;1;1;1;1;1;1;1;1;1;1	2;2;2;2;2;2;2;2;2;2;2;2;2;2;2;2;2;2;2;2;2;1;1;1;1;1;1;1;1;1;1;1;1;1;1;1;1;1;1;1;1;1	42	2	2	2	3.8	68.353	606	606;606;606;606;606;606;606;606;606;606;606;606;606;609;609;609;609;609;609;609;609;606;606;606;606;606;606;606;606;606;606;609;609;609;609;609;609;609;609;609;609;609	0	12.543				3	2742;5054	True;True	2925;5429	177206;177207;177208;177209;177210;177211;177212;177213;177214;177215;177216;177217;177218;177219;177220;177221;177222;177223;177224;177225;177226;177227;177228;177229;177230;345657;345658;345659;345660;345661	326150;326151;326152;326153;326154;326155;326156;326157;326158;326159;326160;326161;326162;326163;326164;326165;326166;326167;326168;326169;326170;326171;326172;326173;326174;326175;633249;633250;633251;633252;633253	326151;633252			P03915	NU5M_HUMAN	NADH-ubiquinone oxidoreductase chain 5 OS=Homo sapiens (Human) GN=MT-ND5 PE=1 SV=2	1.5e-181	0.682	0.874	ok	47867	41767	11727	12147	15003		17923	17562			73353
3	I7B9D9	I7B9D9;I7B921;I7B050;Q8SE74;Q7IIJ3;K7NFR6;K7NE14;D3YM30;A0A060N868;A0A060N7L9;A0A060N4B8;A0A060N491;A0A060N467;A0A060N403;A0A060N3U5	I7B9D9;I7B921;I7B050;Q8SE74;Q7IIJ3;K7NFR6;K7NE14;D3YM30;A0A060N868;A0A060N7L9;A0A060N4B8;A0A060N491;A0A060N467;A0A060N403;A0A060N3U5;A0A0F7NSL8;A0A0F7NQ04;I7AEJ9;T2DJY2;Q8SJJ9;Q3L6P9;C6H079;C6H053;C6H014;C6GZS3;C6GZA4;C6GZ91;B6RD50;B5B8J7;B5B8I4;B5B8F8;B5B8E5;B4XAM2;B3F2Y7;A8QWA9;A8QWA6;A8QW70;A8QW57;A5JFJ6;A4KVU4;A1XJ50;A0A0F7R5Y6;A0A0B4RWG7	NADH-ubiquinone oxidoreductase chain 1	tr|I7B9D9|I7B9D9_URSMA NADH-ubiquinone oxidoreductase chain 1 OS=Ursus maritimus (Polar bear) (Thalarctos maritimus) GN=ND1 PE=3 SV=1;tr|I7B921|I7B921_URSAR NADH-ubiquinone oxidoreductase chain 1 OS=Ursus arctos (Brown bear) (Grizzly bear) GN=ND1 PE=3 SV	ND1	3;3;3;3;3;3;3;3;3;3;3;3;3;3;3;1;1;1;1;1;1;1;1;1;1;1;1;1;1;1;1;1;1;1;1;1;1;1;1;1;1;1;1	3;3;3;3;3;3;3;3;3;3;3;3;3;3;3;1;1;1;1;1;1;1;1;1;1;1;1;1;1;1;1;1;1;1;1;1;1;1;1;1;1;1;1	3;3;3;3;3;3;3;3;3;3;3;3;3;3;3;1;1;1;1;1;1;1;1;1;1;1;1;1;1;1;1;1;1;1;1;1;1;1;1;1;1;1;1	43	3	3	3	8.9	35.503	316	316;316;316;318;318;318;318;318;318;318;318;318;318;318;318;276;276;316;318;318;318;318;318;318;318;318;318;318;318;318;318;318;318;318;318;318;318;318;318;318;318;318;318	0	19.523				4	3268;4625;9782	True;True;True	3484;4946;10580	205764;205765;205766;205767;205768;205769;205770;309856;309857;309858;309859;309860;309861;309862;309863;309864;309865;309866;309867;309868;309869;309870;679360;679361;679362;679363;679364	372961;372962;372963;372964;372965;372966;372967;372968;562480;562481;562482;562483;562484;562485;562486;562487;562488;562489;562490;562491;562492;562493;562494;562495;1235800;1235801;1235802;1235803;1235804	372963;562480;1235800			P03886	NU1M_HUMAN	NADH-ubiquinone oxidoreductase chain 1 OS=Homo sapiens (Human) GN=MT-ND1 PE=1 SV=1	1.5e-152	0.79	0.933	ok	111870	114880							17858	29037
4	Q8SJJ6	Q8SJJ6;Q2Y0B9;I7B915;D3YLW8;C6H017;B6CTY2;B4XAL2;B3F2Z0;A8QW60;A1XJ53;A0A0F7R0Q9;A0A060N8D4;Q8SJH2;A8QW73;T2DK54;C6GZX8;C6GZH2;B5B8G1;A7DXV0;A4KVU7;A0A060N6Y6;A0A060N3M0;Q8SJI4;C6H0C1;B5B8K0;Q3L6Q1;A8QW96;B5B8I7;A8QWB2;C6GZR3;B6CMH5;I7B0Q3	Q8SJJ6;Q2Y0B9;I7B915;D3YLW8;C6H017;B6CTY2;B4XAL2;B3F2Z0;A8QW60;A1XJ53;A0A0F7R0Q9;A0A060N8D4;Q8SJH2;A8QW73;T2DK54;C6GZX8;C6GZH2;B5B8G1;A7DXV0;A4KVU7;A0A060N6Y6;A0A060N3M0;Q8SJI4;C6H0C1;B5B8K0;Q3L6Q1;A8QW96;B5B8I7;A8QWB2;C6GZR3;B6CMH5;I7B0Q3	Cytochrome c oxidase subunit 2	tr|Q8SJJ6|Q8SJJ6_URSAM Cytochrome c oxidase subunit 2 OS=Ursus americanus (American black bear) (Euarctos americanus) GN=COX2 PE=3 SV=1;sp|Q2Y0B9|COX2_AILME Cytochrome c oxidase subunit 2 OS=Ailuropoda melanoleuca (Giant panda) GN=MT-CO2 PE=3 SV=1;tr|I7B	COX2	6;6;6;6;6;6;6;6;6;6;6;6;5;5;5;5;5;5;5;5;5;5;5;4;4;4;4;4;4;4;4;4	6;6;6;6;6;6;6;6;6;6;6;6;5;5;5;5;5;5;5;5;5;5;5;4;4;4;4;4;4;4;4;4		32	6	6	6	30.8	26.071	227	227;227;227;227;227;227;227;227;227;227;227;227;227;227;227;227;227;227;227;227;227;227;227;219;227;227;227;227;227;227;227;227	0	105.52				5	4193;5455;5597;6193;8093;9599	True;True;True;True;True;True	4469;4470;4471;5856;6017;6018;6019;6695;6696;8775;10385;10386;10387	277744;277745;277746;277747;277748;277749;277750;277751;277752;277753;277754;277755;277756;277757;277758;277759;277760;277761;277762;277763;277764;277765;277766;277767;277768;277769;277770;277771;277772;277773;277774;277775;277776;277777;277778;277779;277780;277781;277782;277783;277784;277785;277786;277787;277788;277789;277790;277791;277792;277793;277794;277795;277796;277797;277798;277799;277800;…	507599;507600;507601;507602;507603;507604;507605;507606;507607;507608;507609;507610;507611;507612;507613;507614;507615;507616;507617;507618;507619;507620;507621;507622;507623;507624;507625;507626;507627;507628;507629;507630;507631;507632;507633;507634;507635;507636;507637;507638;507639;507640;507641;507642;507643;507644;507645;507646;507647;507648;507649;507650;507651;507652;507653;507654;507655;…	507630;683846;703174;787419;988944;1212755	0;1;2;3;4;5;6	86;87;146;148;152;185;187	P00403	COX2_HUMAN	Cytochrome c oxidase subunit 2 OS=Homo sapiens (Human) GN=MT-CO2 PE=1 SV=1	2.3e-106	0.759	0.891	ok	1751500	1650300	1869800	1884100	1177500	1133600	1692800	2387200	135460	121630	2347800
5	A0A0F7QJ33	A0A0F7QJ33;D2I0N2;G1MBJ4	A0A0F7QJ33;D2I0N2;G1MBJ4	SCOT protein	tr|A0A0F7QJ33|A0A0F7QJ33_URSTH SCOT protein OS=Ursus thibetanus japonicus (Japanese black bear) GN=SCOT PE=2 SV=1;tr|D2I0N2|D2I0N2_AILME Putative uncharacterized protein OS=Ailuropoda melanoleuca (Giant panda) GN=PANDA_018769 PE=4 SV=1;tr|G1MBJ4|G1MBJ4_A	SCOT	2;2;2	2;2;2	2;2;2	3	2	2	2	20.2	26.148	238	238;483;520	0	8.5365				7	284;3202	True;True	300;3410	20450;20451;20452;202705;202706;202707;202708;202709;202710;202711;202712;202713;202714;202715	34874;34875;34876;367934;367935;367936;367937;367938;367939;367940;367941;367942;367943;367944	34875;367938			P55809	SCOT1_HUMAN	Succinyl-CoA:3-ketoacid coenzyme A transferase 1, mitochondrial OS=Homo sapiens (Human) GN=OXCT1 PE=1 SV=1	6.7e-118	0.924	0.983	ok			24437	25770		14034			24219	21613
6	A0A0F7QJ39	A0A0F7QJ39	A0A0F7QJ39;D2HNP3;G1MHG3;D2HF18;G1MNW2;D2HXL6	Peptidyl-prolyl cis-trans isomerase	tr|A0A0F7QJ39|A0A0F7QJ39_URSTH Peptidyl-prolyl cis-trans isomerase OS=Ursus thibetanus japonicus (Japanese black bear) GN=PPIA PE=2 SV=1	PPIA	4;1;1;1;1;1	4;1;1;1;1;1	4;1;1;1;1;1	6	4	4	4	23	16.596	152	152;143;146;169;171;295	0	7.3271				8	2484;4064;9395;9396	True;True;True;True	2651;4329;10165;10166	160439;160440;160441;160442;160443;160444;160445;160446;160447;269095;269096;269097;653668;653669;653670;653671;653672;653673;653674;653675;653676	294542;294543;294544;294545;294546;294547;294548;294549;294550;294551;294552;294553;294554;490706;490707;490708;1187380;1187381;1187382;1187383;1187384;1187385;1187386;1187387;1187388;1187389;1187390;1187391	294552;490708;1187384;1187391			P62937	PPIA_HUMAN	Peptidyl-prolyl cis-trans isomerase A OS=Homo sapiens (Human) GN=PPIA PE=1 SV=2	6.9e-74	0.993	1	ok			53428				61995	64706
7	B5U1S1	B5U1S1;D2H071	B5U1S1;D2H071	Adiponectin	tr|B5U1S1|B5U1S1_URSAR Adiponectin OS=Ursus arctos arctos (European brown bear) PE=2 SV=1;tr|D2H071|D2H071_AILME Uncharacterized protein OS=Ailuropoda melanoleuca (Giant panda) GN=ADIPOQ PE=4 SV=1	---	2;1	2;1	2;1	2	2	2	2	10.5	24.66	229	229;244	0	9.6791				9	3961;9533	True;True	4222;10309	257821;257822;257823;257824;257825;257826;257827;257828;257829;257830;257831;257832;257833;257834;257835;257836;257837;257838;257839;257840;257841;257842;257843;257844;257845;257846;257847;257848;257849;662162;662163;662164;662165;662166;662167;662168;662169;662170;662171;662172;662173;662174;662175;662176	470001;470002;470003;470004;470005;470006;470007;470008;470009;470010;470011;470012;470013;470014;470015;470016;470017;470018;470019;470020;470021;470022;470023;470024;470025;470026;470027;470028;470029;470030;470031;470032;470033;470034;1199738;1199739;1199740;1199741;1199742;1199743;1199744;1199745;1199746;1199747;1199748;1199749;1199750;1199751;1199752;1199753;1199754;1199755;1199756	470034;1199750			Q15848	ADIPO_HUMAN	Adiponectin OS=Homo sapiens (Human) GN=ADIPOQ PE=1 SV=1	1.1e-61	0.852	0.948	ok	73011	75359	48677	45690	98985	72136		44959		84383	74197
8	D2GTZ2	D2GTZ2;G1MG53	D2GTZ2;G1MG53;G1LP02	Aspartate aminotransferase	tr|D2GTZ2|D2GTZ2_AILME Aspartate aminotransferase OS=Ailuropoda melanoleuca (Giant panda) GN=PANDA_000063 PE=3 SV=1;tr|G1MG53|G1MG53_AILME Aspartate aminotransferase OS=Ailuropoda melanoleuca (Giant panda) GN=LOC100474677 PE=3 SV=1	---	27;25;1	27;25;1	27;25;1	3	27	27	27	66.1	44.702	401	401;430;382	0	323.31				31	700;1107;1165;1882;2425;3567;3799;3800;3966;4363;4755;4759;4794;6213;6214;6228;6498;6558;6579;6857;7245;7922;7923;8437;8438;8890;9792	True;True;True;True;True;True;True;True;True;True;True;True;True;True;True;True;True;True;True;True;True;True;True;True;True;True;True	754;1181;1182;1240;2006;2007;2590;3798;4046;4047;4227;4662;5099;5100;5104;5105;5144;6729;6730;6731;6750;7063;7130;7131;7158;7159;7456;7863;8593;8594;8595;8596;9141;9142;9628;10590	47079;47080;47081;47082;47083;47084;47085;47086;47087;47088;47089;47090;47091;47092;47093;47094;47095;47096;47097;47098;47099;47100;47101;47102;47103;47104;47105;47106;47107;47108;47109;47110;47111;47112;47113;47114;47115;47116;47117;47118;47119;47120;47121;47122;47123;47124;47125;47126;47127;47128;47129;47130;47131;47132;47133;47134;47135;47136;47137;47138;47139;47140;47141;47142;47143;47144;471…	81363;81364;81365;81366;81367;81368;81369;81370;81371;81372;81373;81374;81375;81376;81377;81378;81379;81380;81381;81382;81383;81384;81385;81386;81387;81388;81389;81390;81391;81392;81393;81394;81395;81396;81397;81398;81399;81400;81401;81402;81403;81404;81405;81406;81407;81408;81409;81410;81411;81412;81413;81414;81415;81416;81417;81418;81419;81420;81421;81422;81423;81424;81425;81426;81427;81428;814…				P00505	AATM_HUMAN	Aspartate aminotransferase, mitochondrial OS=Homo sapiens (Human) GN=GOT2 PE=1 SV=3	0	0.94	0.993	ok	7009500	7800200	7909400	9663400	8660000	9463100	9956700	8085400	7550300	7435900	8923800
9	D2GU33	D2GU33;G1LE20	D2GU33;G1LE20;D2HV23;G1L1B8	Fructose-bisphosphate aldolase	tr|D2GU33|D2GU33_AILME Fructose-bisphosphate aldolase OS=Ailuropoda melanoleuca (Giant panda) GN=PANDA_000117 PE=3 SV=1;tr|G1LE20|G1LE20_AILME Fructose-bisphosphate aldolase OS=Ailuropoda melanoleuca (Giant panda) GN=ALDOC PE=3 SV=1	---	10;10;1;1	4;4;0;0	4;4;0;0	4	10	4	4	28.6	39.366	364	364;453;363;379	0	245.15				32	1040;1049;1235;3475;5826;6879;8754;9064;9789;9790	True;False;False;True;True;False;True;False;False;False	1113;1122;1316;3703;6262;7478;9488;9814;10587;10588	67399;67943;67944;67945;67946;67947;67948;67949;67950;67951;67952;67953;67954;67955;67956;67957;67958;67959;67960;67961;67962;67963;67964;67965;67966;67967;67968;67969;67970;67971;67972;67973;67974;67975;67976;67977;67978;67979;67980;67981;67982;67983;67984;67985;67986;67987;67988;67989;67990;67991;67992;67993;67994;67995;67996;67997;67998;67999;68000;68001;68002;68003;68004;68005;68006;68007;680…	116751;117598;117599;117600;117601;117602;117603;117604;117605;117606;117607;117608;117609;117610;117611;117612;117613;117614;117615;117616;117617;117618;117619;117620;117621;117622;117623;117624;117625;117626;117627;117628;117629;117630;117631;117632;117633;117634;117635;117636;117637;117638;117639;117640;117641;117642;117643;117644;117645;117646;117647;117648;117649;117650;117651;117652;117653;…	116751;117626;133026;403857;734406;859026;1097454;1143325;1236028;1236394			P09972	ALDOC_HUMAN	Fructose-bisphosphate aldolase C OS=Homo sapiens (Human) GN=ALDOC PE=1 SV=2	3.7e-199	0.986	1	ok	3713400	4290300	5367600	4797400	3805000	2311800	7642700	6013100	4718200	4912000	3162300
10	D2GU64	D2GU64;G1LGJ8	D2GU64;G1LGJ8	Putative uncharacterized protein	tr|D2GU64|D2GU64_AILME Putative uncharacterized protein OS=Ailuropoda melanoleuca (Giant panda) GN=PANDA_000158 PE=4 SV=1;tr|G1LGJ8|G1LGJ8_AILME Uncharacterized protein OS=Ailuropoda melanoleuca (Giant panda) GN=PSMD11 PE=4 SV=1	---	5;5	5;5	5;5	2	5	5	5	13.5	47.463	422	422;427	0.0014472	5.2956				33	202;679;2254;6028;9335	True;True;True;True;True	215;732;2409;6478;10103	11776;45798;148346;148347;148348;148349;148350;148351;148352;148353;148354;417555;417556;417557;648244;648245;648246;648247;648248;648249;648250;648251;648252;648253;648254;648255;648256;648257;648258;648259;648260;648261;648262;648263;648264;648265;648266;648267;648268	20755;79347;273307;273308;273309;273310;273311;273312;273313;273314;273315;765224;765225;765226;1178786;1178787;1178788;1178789;1178790;1178791;1178792;1178793;1178794;1178795;1178796;1178797;1178798;1178799;1178800;1178801;1178802;1178803;1178804;1178805;1178806;1178807;1178808;1178809;1178810	20755;79347;273309;765226;1178804			O00231	PSD11_HUMAN	26S proteasome non-ATPase regulatory subunit 11 OS=Homo sapiens (Human) GN=PSMD11 PE=1 SV=3	5e-174	1	1	ok				29375	23344
11	D2GU78	D2GU78;G1LF60	D2GU78;G1LF60	Putative uncharacterized protein	tr|D2GU78|D2GU78_AILME Putative uncharacterized protein OS=Ailuropoda melanoleuca (Giant panda) GN=PANDA_000173 PE=4 SV=1;tr|G1LF60|G1LF60_AILME Uncharacterized protein OS=Ailuropoda melanoleuca (Giant panda) GN=LOC100464713 PE=4 SV=1	---	2;2	2;2	2;2	2	2	2	2	20	10.384	95	95;143	0	7.9545				34	2387;4622	True;True	2549;4943	155173;309768;309769;309770	284691;562380;562381;562382	284691;562382			P10606	COX5B_HUMAN	Cytochrome c oxidase subunit 5B, mitochondrial OS=Homo sapiens (Human) GN=COX5B PE=1 SV=2	6.2e-39	0.821	0.989	ok
12	G1LGY9	G1LGY9;D2GU94	G1LGY9;D2GU94	Uncharacterized protein	tr|G1LGY9|G1LGY9_AILME Uncharacterized protein OS=Ailuropoda melanoleuca (Giant panda) GN=LRPPRC PE=4 SV=1;tr|D2GU94|D2GU94_AILME Putative uncharacterized protein OS=Ailuropoda melanoleuca (Giant panda) GN=PANDA_000195 PE=4 SV=1	LRPPRC	11;11	11;11	4;4	2	11	11	4	9.9	154.16	1365	1365;1367	0	14.661				35	341;544;1137;1417;2752;2987;4044;5278;5566;5670;7741	True;True;True;True;True;True;True;True;True;True;True	365;585;1212;1505;2935;3185;4309;5669;5985;6097;8396	25381;38353;72590;72591;91644;91645;91646;91647;91648;91649;91650;91651;91652;91653;91654;91655;91656;91657;91658;91659;91660;177381;177382;191245;191246;191247;191248;191249;267524;360242;360243;360244;360245;360246;360247;382251;382252;382253;382254;382255;382256;388565;388566;388567;388568;388569;388570;388571;388572;521124;521125	45066;67047;124549;124550;163589;163590;163591;163592;163593;163594;163595;163596;163597;163598;163599;163600;163601;163602;163603;163604;163605;163606;163607;163608;163609;326444;326445;349579;349580;349581;349582;349583;487999;662719;662720;662721;662722;662723;662724;700487;700488;700489;700490;700491;700492;711188;711189;711190;711191;711192;711193;711194;711195;943875;943876	45066;67047;124550;163596;326444;349580;487999;662722;700489;711192;943876			P42704	LPPRC_HUMAN	Leucine-rich PPR motif-containing protein, mitochondrial OS=Homo sapiens (Human) GN=LRPPRC PE=1 SV=3	0	0.81	0.936	ok			37242	34364	26678	30390	25488	37879	36498	27107
13	D2HPN0	D2HPN0;D2GUD3;G1M4Q5;G1LWF1;D2HX06;D2HJ08;G1M605	D2HPN0;D2GUD3;G1M4Q5;G1LWF1;D2HX06;D2HJ08;G1M605	Putative uncharacterized protein	tr|D2HPN0|D2HPN0_AILME Putative uncharacterized protein OS=Ailuropoda melanoleuca (Giant panda) GN=PANDA_013768 PE=4 SV=1;tr|D2GUD3|D2GUD3_AILME Putative uncharacterized protein OS=Ailuropoda melanoleuca (Giant panda) GN=PANDA_000240 PE=4 SV=1;tr|G1M4Q5|	---	2;2;2;2;2;1;1	2;2;2;2;2;1;1	2;2;2;2;2;1;1	7	2	2	2	6.8	33.862	309	309;310;340;340;340;309;340	0.0079576	4.0584				36	5338;5534	True;True	5734;5938	364193;364194;364195;377559;377560;377561;377562;377563;377564;377565;377566;377567;377568;377569;377570	668820;668821;668822;692181;692182;692183;692184;692185;692186;692187;692188;692189;692190;692191;692192	668821;692182			P62873	GBB1_HUMAN	Guanine nucleotide-binding protein G(I)/G(S)/G(T) subunit beta-1 OS=Homo sapiens (Human) GN=GNB1 PE=1 SV=3	9.1e-116	0.997	1	ok					35971	34232
14	D2GUD6	D2GUD6	D2GUD6	Putative uncharacterized protein	tr|D2GUD6|D2GUD6_AILME Putative uncharacterized protein OS=Ailuropoda melanoleuca (Giant panda) GN=PANDA_000243 PE=4 SV=1	---	3	3	3	1	3	3	3	16.4	21.435	189	189	0	7.5245				37	473;5176;8372	True;True;True	509;5560;9069	33639;33640;352969;352970;352971;352972;352973;352974;352975;352976;561804;561805;561806	58666;58667;58668;58669;645984;645985;645986;645987;645988;645989;645990;645991;1016721;1016722;1016723	58667;645987;1016723			O43674	NDUB5_HUMAN	NADH dehydrogenase [ubiquinone] 1 beta subcomplex subunit 5, mitochondrial OS=Homo sapiens (Human) GN=NDUFB5 PE=1 SV=1	7.6e-83	0.82	0.958	not checked				47419				43329
15	D2GUE8	D2GUE8;G1LEI1	D2GUE8;G1LEI1	Putative uncharacterized protein	tr|D2GUE8|D2GUE8_AILME Putative uncharacterized protein OS=Ailuropoda melanoleuca (Giant panda) GN=PANDA_000260 PE=4 SV=1;tr|G1LEI1|G1LEI1_AILME Uncharacterized protein OS=Ailuropoda melanoleuca (Giant panda) GN=COPS4 PE=4 SV=1	---	3;3	3;3	3;3	2	3	3	3	12.4	40.753	355	355;406	0.007926	3.9509				38	818;857;6066	True;True;True	883;924;6516	53691;58207;58208;58209;58210;419629	91402;100582;100583;100584;100585;768231	91402;100585;768231			Q9BT78	CSN4_HUMAN	COP9 signalosome complex subunit 4 OS=Homo sapiens (Human) GN=COPS4 PE=1 SV=1	1.4e-149	0.997	1	ok
16	D2GUV2	D2GUV2;G1M6I4	D2GUV2;G1M6I4	Proteasome subunit alpha type	tr|D2GUV2|D2GUV2_AILME Proteasome subunit alpha type OS=Ailuropoda melanoleuca (Giant panda) GN=PANDA_000453 PE=3 SV=1;tr|G1M6I4|G1M6I4_AILME Proteasome subunit alpha type OS=Ailuropoda melanoleuca (Giant panda) GN=PSMA8 PE=3 SV=1	---	5;5	2;2	2;2	2	5	2	2	26.6	25.867	233	233;256	0	13.685				40	394;395;490;5931;6077	True;True;False;False;False	428;429;528;6379;6527	29814;29815;29816;29817;29818;29819;29820;29821;29822;29823;29824;29825;29826;29827;29828;29829;29830;29831;29832;29833;29834;29835;29836;29837;29838;29839;29840;29841;29842;29843;29844;29845;29846;29847;29848;29849;29850;29851;29852;29853;29854;29855;29856;29857;29858;29859;29860;29861;34155;34156;34157;34158;34159;34160;34161;34162;34163;34164;34165;34166;34167;34168;34169;34170;34171;34172;341…	52671;52672;52673;52674;52675;52676;52677;52678;52679;52680;52681;52682;52683;52684;52685;52686;52687;52688;52689;52690;52691;52692;52693;52694;52695;52696;52697;52698;52699;52700;52701;52702;52703;52704;52705;52706;52707;52708;52709;52710;52711;52712;52713;52714;52715;52716;52717;52718;52719;52720;52721;52722;59265;59266;59267;59268;59269;59270;59271;59272;59273;59274;59275;59276;59277;59278;592…	52671;52718;59273;753604;768709			Q8TAA3	PSA7L_HUMAN	Proteasome subunit alpha type-7-like OS=Homo sapiens (Human) GN=PSMA8 PE=2 SV=3	4e-127	0.94	0.961	ok	50614	51512		55165	48754				63867	59423	60461
17	D2GUZ5	D2GUZ5;G1LU71	D2GUZ5;G1LU71	Putative uncharacterized protein	tr|D2GUZ5|D2GUZ5_AILME Putative uncharacterized protein OS=Ailuropoda melanoleuca (Giant panda) GN=PANDA_000501 PE=4 SV=1;tr|G1LU71|G1LU71_AILME Uncharacterized protein OS=Ailuropoda melanoleuca (Giant panda) GN=TMEM38A PE=4 SV=1	---	3;3	3;3	3;3	2	3	3	3	14.6	32.892	295	295;303	0	8.322				41	3349;3479;9840	True;True;True	3569;3707;10646	211795;211796;211797;211798;211799;211800;211801;211802;211803;211804;211805;211806;211807;211808;211809;211810;211811;211812;211813;211814;211815;211816;211817;211818;211819;222272;222273;222274;222275;222276;222277;222278;222279;222280;222281;222282;222283;683622;683623;683624;683625;683626;683627;683628;683629;683630;683631;683632;683633	385144;385145;385146;385147;385148;385149;385150;385151;385152;385153;385154;385155;385156;385157;385158;385159;385160;385161;385162;385163;385164;385165;385166;385167;385168;405849;405850;405851;405852;405853;405854;405855;405856;405857;405858;405859;405860;1242507;1242508;1242509;1242510;1242511;1242512;1242513;1242514;1242515;1242516;1242517;1242518	385163;405860;1242516			Q9H6F2	TM38A_HUMAN	Trimeric intracellular cation channel type A OS=Homo sapiens (Human) GN=TMEM38A PE=1 SV=1	4.5e-104	0.942	0.976	not checked		39576	39295	41983	39424	29337	39566	40095	36667
18	D2GV10	D2GV10;G1LVR5;G1LVQ8	D2GV10;G1LVR5;G1LVQ8	Putative uncharacterized protein	tr|D2GV10|D2GV10_AILME Putative uncharacterized protein OS=Ailuropoda melanoleuca (Giant panda) GN=PANDA_000526 PE=4 SV=1;tr|G1LVR5|G1LVR5_AILME Uncharacterized protein OS=Ailuropoda melanoleuca (Giant panda) GN=PGLS PE=4 SV=1;tr|G1LVQ8|G1LVQ8_AILME Unch	---	2;2;1	2;2;1	2;2;1	3	2	2	2	15.9	26.936	251	251;254;243	0	7.0242				42	66;9506	True;True	71;10278	3052;660340;660341;660342;660343;660344	4542;1196828;1196829;1196830;1196831;1196832	4542;1196828			O95336	6PGL_HUMAN	6-phosphogluconolactonase OS=Homo sapiens (Human) GN=PGLS PE=1 SV=2	2.5e-85	0.838	0.888	ok					19298
19	D2GW09	D2GW09;G1MAL3;D2GV37;G1LBG7;D2HFP2;D2HFP1;G1MLE1	D2GW09;G1MAL3;D2GV37;G1LBG7;D2HFP2;D2HFP1;G1MLE1	Putative uncharacterized protein	tr|D2GW09|D2GW09_AILME Putative uncharacterized protein OS=Ailuropoda melanoleuca (Giant panda) GN=PANDA_000950 PE=4 SV=1;tr|G1MAL3|G1MAL3_AILME Uncharacterized protein OS=Ailuropoda melanoleuca (Giant panda) GN=LOC100474009 PE=4 SV=1;tr|D2GV37|D2GV37_AI	---	3;3;3;3;3;2;2	3;3;3;3;3;2;2	3;3;3;3;3;2;2	7	3	3	3	43	8.9361	79	79;91;128;156;229;65;66	0	37.005				43	2304;8283;8359	True;True;True	2463;8977;9056	150588;150589;150590;150591;150592;150593;150594;150595;150596;150597;150598;150599;150600;150601;150602;150603;150604;150605;150606;150607;150608;150609;150610;150611;150612;150613;150614;150615;150616;150617;150618;150619;150620;150621;150622;150623;150624;150625;150626;150627;150628;150629;150630;150631;150632;150633;150634;150635;150636;150637;150638;150639;150640;150641;150642;150643;150644;…	276710;276711;276712;276713;276714;276715;276716;276717;276718;276719;276720;276721;276722;276723;276724;276725;276726;276727;276728;276729;276730;276731;276732;276733;276734;276735;276736;276737;276738;276739;276740;276741;276742;276743;276744;276745;276746;276747;276748;276749;276750;276751;276752;276753;276754;276755;276756;276757;276758;276759;276760;276761;276762;276763;276764;276765;276766;…	276727;1008604;1015937			P62987	RL40_HUMAN	Ubiquitin-60S ribosomal protein L40 OS=Homo sapiens (Human) GN=UBA52 PE=1 SV=2	3.8e-29	0.962	0.962	ok	630180	704320	475420	445180	395880	377560	480860	426540	453020	416420	685190
20	D2GV60	D2GV60;G1LZK6	D2GV60;G1LZK6	Putative uncharacterized protein	tr|D2GV60|D2GV60_AILME Putative uncharacterized protein OS=Ailuropoda melanoleuca (Giant panda) GN=PANDA_000586 PE=4 SV=1;tr|G1LZK6|G1LZK6_AILME Uncharacterized protein OS=Ailuropoda melanoleuca (Giant panda) GN=LOC100480549 PE=4 SV=1	---	4;3	4;3	4;3	2	4	4	4	19.8	23.292	207	207;257	0.0014025	4.6959				44	2182;3779;5706;8907	True;True;True;True	2328;4026;6133;9647	141859;141860;246339;246340;246341;246342;246343;246344;391856;391857;391858;391859;391860;614874;614875;614876	260814;260815;450231;450232;450233;450234;450235;450236;450237;450238;717250;717251;717252;717253;717254;717255;1115746;1115747;1115748	260814;450233;717253;1115746			Q9P0J0	NDUAD_HUMAN	NADH dehydrogenase [ubiquinone] 1 alpha subcomplex subunit 13 OS=Homo sapiens (Human) GN=NDUFA13 PE=1 SV=3	9.9e-48	0.867	0.979	not checked				41326
21	D2GVA5	D2GVA5;G1M3F6	D2GVA5;G1M3F6	Microtubule-associated protein	tr|D2GVA5|D2GVA5_AILME Microtubule-associated protein OS=Ailuropoda melanoleuca (Giant panda) GN=PANDA_000639 PE=4 SV=1;tr|G1M3F6|G1M3F6_AILME Microtubule-associated protein OS=Ailuropoda melanoleuca (Giant panda) GN=MAP4 PE=4 SV=1	---	4;4	4;4	4;4	2	4	4	4	5.2	106.11	1022	1022;1023	0.007947	4.0313				45	3478;8940;9447;10042	True;True;True;True	3706;9681;10217;10859	222269;222270;222271;616482;656841;694044;694045;694046	405846;405847;405848;1118502;1192061;1259670;1259671;1259672	405848;1118502;1192061;1259671			P27816	MAP4_HUMAN	Microtubule-associated protein 4 OS=Homo sapiens (Human) GN=MAP4 PE=1 SV=3	6.5e-90	0.723	0.852	ok
22	D2GVB5	D2GVB5;G1LGZ3	D2GVB5;G1LGZ3	3-hydroxyisobutyrate dehydrogenase	tr|D2GVB5|D2GVB5_AILME 3-hydroxyisobutyrate dehydrogenase OS=Ailuropoda melanoleuca (Giant panda) GN=PANDA_000649 PE=3 SV=1;tr|G1LGZ3|G1LGZ3_AILME 3-hydroxyisobutyrate dehydrogenase OS=Ailuropoda melanoleuca (Giant panda) GN=HIBADH PE=3 SV=1	---	10;10	10;10	10;10	2	10	10	10	44.6	32.259	307	307;337	0	69.396				46	1225;1386;1879;3355;3600;4076;4162;4629;7825;8421	True;True;True;True;True;True;True;True;True;True	1305;1473;2003;3576;3833;4343;4437;4950;8493;9124	76862;76863;76864;76865;76866;76867;76868;76869;76870;76871;76872;76873;76874;76875;76876;76877;76878;89752;89753;89754;89755;89756;89757;89758;89759;89760;89761;89762;89763;121411;121412;121413;121414;121415;121416;121417;121418;121419;121420;121421;121422;121423;121424;121425;121426;121427;212080;212081;212082;212083;212084;212085;212086;212087;212088;212089;212090;212091;212092;212093;212094;2…	132649;132650;132651;132652;132653;132654;132655;132656;132657;132658;132659;132660;132661;132662;132663;132664;132665;132666;132667;132668;132669;132670;132671;132672;158330;158331;158332;158333;158334;158335;158336;158337;158338;158339;158340;158341;158342;221754;221755;221756;221757;221758;221759;221760;221761;221762;221763;221764;221765;221766;221767;221768;221769;221770;385618;385619;385620;…	132672;158342;221770;385622;429965;491931;502855;563091;953940;1023183			P31937	3HIDH_HUMAN	3-hydroxyisobutyrate dehydrogenase, mitochondrial OS=Homo sapiens (Human) GN=HIBADH PE=1 SV=2	2.7e-184	0.984	0.997	ok	90859	147940	250880	278510	529480	444130	181140	220140	189080	259300
23	D2GVC7	D2GVC7;X2D2S5;G1LHD9	D2GVC7;X2D2S5;G1LHD9	Putative uncharacterized protein	tr|D2GVC7|D2GVC7_AILME Putative uncharacterized protein OS=Ailuropoda melanoleuca (Giant panda) GN=PANDA_000670 PE=4 SV=1;tr|X2D2S5|X2D2S5_URSTH Heterogeneous nuclear ribonucleoprotein A2/B1 OS=Ursus thibetanus mupinensis GN=B1 PE=2 SV=1;tr|G1LHD9|G1LHD9	---	6;6;6	6;6;6	6;6;6	3	6	6	6	22.9	34.313	323	323;341;353	0	18.452				47	2964;3007;3854;5194;5866;6944	True;True;True;True;True;True	3161;3206;4104;5579;6305;7546	190268;190269;190270;190271;190272;190273;190274;190275;190276;190277;190278;190279;190280;190281;190282;190283;190284;191963;191964;191965;191966;191967;191968;191969;191970;191971;191972;191973;250199;250200;250201;250202;250203;250204;250205;250206;250207;250208;250209;250210;250211;250212;250213;250214;250215;250216;250217;250218;250219;250220;250221;250222;250223;250224;250225;250226;250227;…	347691;347692;347693;347694;347695;347696;347697;347698;347699;347700;347701;347702;347703;347704;347705;347706;347707;351147;351148;351149;351150;351151;351152;351153;351154;351155;351156;351157;456157;456158;456159;456160;456161;456162;456163;456164;456165;456166;456167;456168;456169;456170;456171;456172;456173;456174;456175;456176;456177;456178;456179;456180;456181;456182;456183;456184;456185;…	347694;351150;456168;647333;744372;865314			P22626	ROA2_HUMAN	Heterogeneous nuclear ribonucleoproteins A2/B1 OS=Homo sapiens (Human) GN=HNRNPA2B1 PE=1 SV=2	4.3e-55	0.997	1	OK	58072		43616	48694	50392	51226	61817		72967	64214	62458
24	D2GVE2	D2GVE2;G1MG55	D2GVE2;G1MG55	Putative uncharacterized protein	tr|D2GVE2|D2GVE2_AILME Putative uncharacterized protein OS=Ailuropoda melanoleuca (Giant panda) GN=PANDA_000689 PE=3 SV=1;tr|G1MG55|G1MG55_AILME Uncharacterized protein OS=Ailuropoda melanoleuca (Giant panda) GN=DCXR PE=3 SV=1	---	2;2	2;2	2;2	2	2	2	2	14.4	20.577	194	194;246	0.0014085	4.7527				49	526;2860	True;True	566;3051	37040;185251;185252;185253;185254;185255;185256	64892;339966;339967;339968;339969;339970;339971	64892;339968			Q7Z4W1	DCXR_HUMAN	L-xylulose reductase OS=Homo sapiens (Human) GN=DCXR PE=1 SV=2	2e-77	0.856	0.974	ok
25	D2GVF3	D2GVF3;G1MGH3	D2GVF3;G1MGH3	Putative uncharacterized protein	tr|D2GVF3|D2GVF3_AILME Putative uncharacterized protein OS=Ailuropoda melanoleuca (Giant panda) GN=PANDA_000702 PE=4 SV=1;tr|G1MGH3|G1MGH3_AILME Uncharacterized protein OS=Ailuropoda melanoleuca (Giant panda) GN=LOC100479542 PE=4 SV=1	---	6;5	6;5	6;5	2	6	6	6	39.2	23.407	204	204;206	0	75.342				50	182;5907;7653;7654;9534;9929	True;True;True;True;True;True	194;6351;8302;8303;10310;10738	10781;10782;10783;10784;10785;10786;10787;10788;10789;10790;10791;10792;10793;10794;10795;10796;10797;10798;10799;10800;10801;10802;10803;10804;10805;10806;10807;10808;10809;10810;10811;10812;10813;10814;10815;10816;10817;10818;10819;10820;10821;10822;10823;10824;10825;10826;10827;10828;10829;10830;10831;10832;10833;409435;409436;409437;409438;409439;409440;409441;409442;409443;409444;409445;4094…	19189;19190;19191;19192;19193;19194;19195;19196;19197;19198;19199;19200;19201;19202;19203;19204;19205;19206;19207;19208;19209;19210;19211;19212;19213;19214;19215;19216;19217;19218;19219;19220;19221;19222;19223;19224;19225;19226;19227;19228;19229;19230;19231;19232;19233;19234;19235;19236;19237;19238;19239;19240;19241;19242;19243;19244;19245;19246;750402;750403;750404;750405;750406;750407;750408;75…	19232;750402;935779;935855;1199762;1249607			P52565	GDIR1_HUMAN	Rho GDP-dissociation inhibitor 1 OS=Homo sapiens (Human) GN=ARHGDIA PE=1 SV=3	7.9e-94	0.966	0.995	ok	248120	273650	194820	216990	289790	267390	201190	150410	302940	275300	259510
26	D2GVF4	D2GVF4;G1MGJ0	D2GVF4;G1MGJ0	Protein disulfide-isomerase	tr|D2GVF4|D2GVF4_AILME Protein disulfide-isomerase OS=Ailuropoda melanoleuca (Giant panda) GN=PANDA_000703 PE=3 SV=1;tr|G1MGJ0|G1MGJ0_AILME Protein disulfide-isomerase OS=Ailuropoda melanoleuca (Giant panda) GN=P4HB PE=3 SV=1	---	20;20	20;20	20;20	2	20	20	20	50.3	52.227	463	463;510	0	66.703				51	427;1623;1709;3229;3670;4134;4139;5220;5365;5375;6119;6400;6572;6974;7046;8217;8546;8723;9943;10013	True;True;True;True;True;True;True;True;True;True;True;True;True;True;True;True;True;True;True;True	463;1730;1820;3443;3907;4405;4410;5608;5763;5774;6586;6961;7149;7580;7654;8904;9256;9451;10752;10827	31298;31299;31300;31301;31302;31303;108154;108155;108156;113055;113056;113057;113058;113059;113060;113061;113062;204094;204095;204096;204097;204098;204099;204100;204101;204102;204103;204104;204105;204106;204107;204108;204109;204110;204111;204112;204113;204114;204115;204116;204117;238589;238590;238591;274138;274139;274140;274141;274142;274143;274144;274145;274146;274147;274148;274149;274150;274151…	54987;54988;54989;54990;54991;54992;197880;197881;197882;207556;207557;207558;207559;207560;207561;207562;207563;370257;370258;370259;370260;370261;370262;370263;370264;370265;370266;370267;370268;370269;370270;370271;370272;370273;370274;370275;370276;370277;370278;370279;370280;436708;436709;436710;499742;499743;499744;499745;499746;499747;499748;499749;499750;499751;499752;499753;499754;499755…	54988;197880;207560;370267;436708;499785;499916;651687;674648;675279;771596;813243;838543;871550;877852;1001197;1041294;1094854;1250092;1256258			P07237	PDIA1_HUMAN	Protein disulfide-isomerase OS=Homo sapiens (Human) GN=P4HB PE=1 SV=3	0	0.952	0.985	ok			103780	93049	41508		83530	98939	51059	43884
27	Q2L897	Q2L897;D2GVI2	Q2L897;D2GVI2	Cytochrome b-c1 complex subunit 8	sp|Q2L897|QCR8_AILME Cytochrome b-c1 complex subunit 8 OS=Ailuropoda melanoleuca (Giant panda) GN=UQCRQ PE=3 SV=3;tr|D2GVI2|D2GVI2_AILME Cytochrome b-c1 complex subunit 8 OS=Ailuropoda melanoleuca (Giant panda) GN=UQCRQ PE=4 SV=1	UQCRQ	2;2	2;2	2;2	2	2	2	2	24.4	9.7321	82	82;82	0	16.615				52	3100;3723	True;True	3301;3969	196971;196972;196973;196974;242766;242767;242768;242769;242770;242771;242772;242773;242774;242775;242776;242777;242778	358851;358852;358853;358854;443721;443722;443723;443724;443725;443726;443727;443728;443729;443730;443731;443732;443733;443734;443735;443736	358853;443731			O14949	QCR8_HUMAN	Cytochrome b-c1 complex subunit 8 OS=Homo sapiens (Human) GN=UQCRQ PE=1 SV=4	1.5e-35	0.829	0.927	ok			29867	28313			37330	34458
28	D2GVU4	D2GVU4;G1M502	D2GVU4;G1M502;D2H0H8	Putative uncharacterized protein	tr|D2GVU4|D2GVU4_AILME Putative uncharacterized protein OS=Ailuropoda melanoleuca (Giant panda) GN=PANDA_000873 PE=3 SV=1;tr|G1M502|G1M502_AILME Uncharacterized protein OS=Ailuropoda melanoleuca (Giant panda) GN=LOC100483231 PE=3 SV=1	---	17;17;1	17;17;1	15;15;0	3	17	17	15	48.1	55.239	509	509;521;517	0	187.93				53	34;1728;1840;2085;3505;3562;4813;4890;5429;8157;8169;8246;8270;8631;9502;9573;10125	True;True;True;True;True;True;True;True;True;True;True;True;True;True;True;True;True	36;1840;1959;1960;2223;3734;3793;5164;5246;5830;8841;8854;8934;8962;9349;10274;10357;10948	1674;1675;1676;1677;1678;1679;1680;1681;1682;1683;1684;1685;1686;1687;1688;1689;1690;1691;1692;1693;1694;1695;1696;1697;1698;1699;1700;1701;1702;1703;1704;1705;1706;1707;1708;1709;1710;1711;1712;1713;1714;1715;1716;1717;1718;1719;1720;1721;1722;1723;1724;1725;1726;1727;1728;1729;1730;1731;1732;1733;1734;1735;1736;1737;113989;113990;113991;113992;113993;113994;113995;113996;113997;113998;113999;11…	2526;2527;2528;2529;2530;2531;2532;2533;2534;2535;2536;2537;2538;2539;2540;2541;2542;2543;2544;2545;2546;2547;2548;2549;2550;2551;2552;2553;2554;2555;2556;2557;2558;2559;2560;2561;2562;2563;2564;2565;2566;2567;2568;2569;2570;2571;2572;2573;2574;2575;2576;2577;2578;2579;2580;2581;2582;2583;2584;2585;2586;2587;2588;2589;2590;2591;2592;2593;2594;2595;2596;2597;2598;2599;2600;2601;2602;2603;2604;2605…	2584;209330;216890;252763;408737;426202;587309;594365;680284;995921;997304;1005005;1007620;1057474;1196738;1209559;1265606	23	419	P05091	ALDH2_HUMAN	Aldehyde dehydrogenase, mitochondrial OS=Homo sapiens (Human) GN=ALDH2 PE=1 SV=2	0	0.937	0.984	ok	433050	308940	458630	556450	570370	566050	614400	625290	571880	593920	494990
29	D2GVU9	D2GVU9;G1M5G2	D2GVU9;G1M5G2;G1MA48	Putative uncharacterized protein	tr|D2GVU9|D2GVU9_AILME Putative uncharacterized protein OS=Ailuropoda melanoleuca (Giant panda) GN=PANDA_000880 PE=4 SV=1;tr|G1M5G2|G1M5G2_AILME Uncharacterized protein OS=Ailuropoda melanoleuca (Giant panda) GN=MYL2 PE=4 SV=1	---	15;15;1	15;15;1	15;15;1	3	15	15	15	83.7	18.922	166	166;200;176	0	224.79				54	186;1245;1452;1589;1753;1838;2743;2833;5391;6380;6546;6547;7255;8851;9244	True;True;True;True;True;True;True;True;True;True;True;True;True;True;True	198;1327;1551;1552;1694;1867;1957;2926;3023;5790;6938;6939;7114;7115;7873;9589;10008	11044;11045;11046;11047;11048;77755;77756;77757;77758;77759;77760;77761;77762;77763;77764;77765;77766;77767;77768;77769;77770;77771;77772;77773;77774;98470;98471;98472;98473;98474;98475;98476;98477;98478;98479;98480;98481;98482;98483;98484;98485;98486;98487;98488;98489;98490;98491;98492;98493;98494;98495;98496;98497;98498;98499;98500;98501;98502;105735;105736;105737;105738;105739;105740;105741;10…	19560;19561;19562;19563;19564;134036;134037;134038;134039;134040;134041;134042;134043;134044;134045;134046;134047;134048;134049;134050;134051;134052;134053;134054;134055;134056;134057;134058;134059;134060;134061;180367;180368;180369;180370;180371;180372;180373;180374;180375;180376;180377;180378;180379;180380;180381;180382;180383;180384;180385;180386;180387;180388;180389;180390;180391;180392;18039…	19563;134055;180421;193459;211727;216770;326237;338340;676568;811831;835795;835818;897300;1110256;1169858	24;25	69;122	P10916	MLRV_HUMAN	Myosin regulatory light chain 2, ventricular/cardiac muscle isoform OS=Homo sapiens (Human) GN=MYL2 PE=1 SV=3	1.4e-62	0.958	0.988	not checked	250540	369560	2259800	2841700			2006600	2102300			433400
30	D2GW48	D2GW48	D2GW48	Protein disulfide-isomerase	tr|D2GW48|D2GW48_AILME Protein disulfide-isomerase OS=Ailuropoda melanoleuca (Giant panda) GN=PDIA3 PE=3 SV=1	PDIA3	3	3	3	1	3	3	3	6.3	56.828	505	505	0	7.7344				55	1384;1762;5791	True;True;True	1471;1878;6226	89747;115649;400108;400109;400110	158325;212154;731385;731386;731387	158325;212154;731385			P30101	PDIA3_HUMAN	Protein disulfide-isomerase A3 OS=Homo sapiens (Human) GN=PDIA3 PE=1 SV=4	0	0.952	0.976	ok
31	D2GW72	D2GW72;G1MBZ6	D2GW72;G1MBZ6	Putative uncharacterized protein	tr|D2GW72|D2GW72_AILME Putative uncharacterized protein OS=Ailuropoda melanoleuca (Giant panda) GN=PANDA_001035 PE=4 SV=1;tr|G1MBZ6|G1MBZ6_AILME Uncharacterized protein OS=Ailuropoda melanoleuca (Giant panda) GN=CAPN3 PE=4 SV=1	---	6;6	6;6	6;6	2	6	6	6	8.1	92.072	803	803;824	0.0014286	5.1221				57	1211;2698;6230;6382;8286;8433	True;True;True;True;True;True	1288;2879;6752;6943;8980;9136	75806;175521;175522;175523;175524;175525;175526;430774;430775;430776;443217;443218;557086;557087;557088;557089;557090;557091;557092;557093;557094;557095;566936	130290;323525;323526;323527;323528;323529;323530;789250;789251;789252;789253;812102;812103;1008851;1008852;1008853;1008854;1008855;1008856;1008857;1008858;1008859;1008860;1024607	130290;323526;789253;812102;1008855;1024607			P20807	CAN3_HUMAN	Calpain-3 OS=Homo sapiens (Human) GN=CAPN3 PE=1 SV=2	0	0.923	0.975	ok					33044		32012	30234		37871
32	D2GWD4	D2GWD4	D2GWD4	Putative uncharacterized protein	tr|D2GWD4|D2GWD4_AILME Putative uncharacterized protein OS=Ailuropoda melanoleuca (Giant panda) GN=PANDA_001108 PE=4 SV=1	---	47	1	1	1	47	1	1	47.4	152.9	1359	1359	0	23.243				58	62;379;422;615;717;1038;1087;1102;1146;1729;1910;1983;2316;2330;2450;2797;3121;3185;3277;3338;3965;4147;4291;4334;4407;5545;5817;6343;6617;6900;6999;7027;7091;7323;7624;7983;7997;8036;8129;8131;8195;8309;8911;9010;9462;9855;9895	False;False;False;False;False;False;True;False;False;False;False;False;False;False;False;False;False;False;False;False;False;False;False;False;False;False;False;False;False;False;False;False;False;False;False;False;False;False;False;False;False;False;False;False;False;False;False	67;407;408;458;663;772;773;1111;1160;1176;1221;1841;2036;2114;2475;2489;2617;2983;3325;3392;3393;3493;3558;4226;4418;4582;4630;4710;5951;5952;6252;6899;7197;7499;7605;7635;7700;7946;8272;8658;8673;8715;8813;8815;8881;9003;9651;9757;10232;10661;10662;10704	2786;2787;2788;2789;2790;2791;2792;2793;2794;2795;2796;2797;2798;2799;2800;2801;2802;2803;2804;2805;2806;2807;2808;2809;2810;2811;2812;2813;2814;2815;2816;2817;2818;2819;2820;2821;2822;2823;2824;2825;2826;2827;2828;2829;2830;2831;2832;2833;2834;2835;2836;2837;2838;2839;2840;2841;2842;2843;2844;2845;2846;2847;2848;2849;2850;2851;2852;2853;2854;2855;2856;2857;2858;2859;2860;2861;2862;2863;2864;2865…	4124;4125;4126;4127;4128;4129;4130;4131;4132;4133;4134;4135;4136;4137;4138;4139;4140;4141;4142;4143;4144;4145;4146;4147;4148;4149;4150;4151;4152;4153;4154;4155;4156;4157;4158;4159;4160;4161;4162;4163;4164;4165;4166;4167;4168;4169;4170;4171;4172;4173;4174;4175;4176;4177;4178;4179;4180;4181;4182;4183;4184;4185;4186;4187;4188;4189;4190;4191;4192;4193;4194;4195;4196;4197;4198;4199;4200;4201;4202;4203…	4138;49134;54322;74064;82828;116170;119879;120804;125464;209398;225266;230783;278426;278877;290570;333294;361170;366278;373370;384546;470531;501039;518031;525763;534675;697908;733869;808784;843180;863423;873230;875566;884136;906691;933302;965086;966422;983040;993022;993094;999677;1011360;1115861;1133095;1193740;1243018;1246793	27;28;29	185;503;1271	Q5VTT5	MYOM3_HUMAN	Myomesin-3 OS=Homo sapiens (Human) GN=MYOM3 PE=2 SV=1	0	0.874	0.953	not checked	139910	126050	177090	167650	157620	106530	173810	161100	195490	198900	137600
33	D2GWL4	D2GWL4;G1LY98	D2GWL4;G1LY98	Putative uncharacterized protein	tr|D2GWL4|D2GWL4_AILME Putative uncharacterized protein OS=Ailuropoda melanoleuca (Giant panda) GN=PANDA_001210 PE=4 SV=1;tr|G1LY98|G1LY98_AILME Uncharacterized protein OS=Ailuropoda melanoleuca (Giant panda) GN=EPB41 PE=4 SV=1	---	2;2	2;2	2;2	2	2	2	2	2.7	95.917	852	852;858	0.0040928	4.2801				60	2619;4326	True;True	2796;4620	171421;171422;287754	316363;316364;525582	316363;525582			P11171	41_HUMAN	Protein 4.1 OS=Homo sapiens (Human) GN=EPB41 PE=1 SV=4	7.9e-208	0.935	0.961	ok
34	D2GWN4	D2GWN4;G1MIX7	D2GWN4;G1MIX7;G1L0P0	Putative uncharacterized protein	tr|D2GWN4|D2GWN4_AILME Putative uncharacterized protein OS=Ailuropoda melanoleuca (Giant panda) GN=PANDA_001240 PE=4 SV=1;tr|G1MIX7|G1MIX7_AILME Uncharacterized protein OS=Ailuropoda melanoleuca (Giant panda) GN=LOC100463627 PE=4 SV=1	---	5;5;1	5;5;1	5;5;1	3	5	5	5	29.9	16.976	144	144;169;155	0	31.607				61	1681;2672;7274;7509;9676	True;True;True;True;True	1791;2852;2853;7892;8150;10466	111715;111716;111717;111718;111719;111720;111721;111722;111723;111724;111725;111726;111727;111728;111729;111730;111731;111732;111733;111734;111735;111736;111737;111738;111739;111740;111741;111742;111743;111744;111745;111746;111747;111748;111749;111750;111751;111752;111753;111754;111755;174531;174532;174533;174534;174535;174536;174537;174538;174539;174540;174541;174542;174543;174544;493834;508356;…	205265;205266;205267;205268;205269;205270;205271;205272;205273;205274;205275;205276;205277;205278;205279;205280;205281;205282;205283;205284;205285;205286;205287;205288;205289;205290;205291;205292;205293;205294;205295;205296;205297;205298;205299;205300;205301;205302;205303;205304;205305;205306;205307;205308;205309;205310;205311;205312;205313;205314;205315;322092;322093;322094;322095;322096;322097;…	205307;322105;899680;921730;1218482	31	68	P13073	COX41_HUMAN	Cytochrome c oxidase subunit 4 isoform 1, mitochondrial OS=Homo sapiens (Human) GN=COX4I1 PE=1 SV=1	7.7e-66	0.806	0.979	ok		92286	104890	114930	40738		191420	134520		46400	136330
35	G1LEN3	G1LEN3;D2GWS2	G1LEN3;D2GWS2;D2I873	Uncharacterized protein	tr|G1LEN3|G1LEN3_AILME Uncharacterized protein OS=Ailuropoda melanoleuca (Giant panda) GN=FLNC PE=4 SV=1;tr|D2GWS2|D2GWS2_AILME Putative uncharacterized protein OS=Ailuropoda melanoleuca (Giant panda) GN=PANDA_001285 PE=4 SV=1	FLNC	114;114;4	114;114;4	101;101;0	3	114	114	101	54.3	290.63	2722	2722;2725;252	0	323.31				62	190;194;195;241;242;397;411;461;578;614;628;698;728;729;787;916;1060;1098;1099;1208;1282;1357;1358;1421;1568;1616;1726;1727;1780;2026;2370;2403;2596;2670;2673;2809;2844;2848;2849;2915;2942;3014;3195;3258;3293;3373;3430;3616;3715;3730;3732;3735;3867;4008;4185;4257;4306;4378;4385;5046;5129;5130;5269;5312;5313;5472;5796;5940;6023;6121;6309;6371;6646;6814;6904;7340;7768;7822;7823;8069;8070;8113;8211;…	True;True;True;True;True;True;True;True;True;True;True;True;True;True;True;True;True;True;True;True;True;True;True;True;True;True;True;True;True;True;True;True;True;True;True;True;True;True;True;True;True;True;True;True;True;True;True;True;True;True;True;True;True;True;True;True;True;True;True;True;True;True;True;True;True;True;True;True;True;True;True;True;True;True;True;True;True;True;True;True…	202;207;208;254;255;431;445;497;624;662;678;752;785;786;850;985;1133;1172;1173;1285;1364;1442;1443;1509;1672;1723;1838;1839;1897;2160;2532;2566;2771;2850;2854;2996;2997;3035;3039;3040;3108;3137;3214;3403;3473;3511;3595;3656;3849;3959;3976;3978;3981;4117;4272;4460;4544;4598;4677;4685;5419;5510;5511;5660;5706;5707;5873;6231;6388;6473;6589;6864;6929;7227;7412;7503;7964;8424;8489;8490;8750;8751;8795;…	11178;11179;11180;11181;11182;11183;11184;11185;11186;11187;11188;11189;11190;11191;11192;11193;11424;11425;11426;11427;11428;11429;11430;11431;11432;11433;11434;11435;11436;11437;11438;11439;11440;11441;11442;11443;11444;11445;11446;11447;11448;11449;11450;11451;11452;11453;11454;11455;11456;11457;11458;11459;11460;11461;11462;11463;11464;11465;11466;11467;11468;11469;11470;11471;11472;11473;114…					Q14315	FLNC_HUMAN	Filamin-C OS=Homo sapiens (Human) GN=FLNC PE=1 SV=3	0	0.975	0.991	ok	6375600	6394100	8213000	8384600	7155600	6991800	7830100	7986500	7167300	6986000	6281000
36	D2GWV1	D2GWV1;G1LJW1	D2GWV1;G1LJW1	Putative uncharacterized protein	tr|D2GWV1|D2GWV1_AILME Putative uncharacterized protein OS=Ailuropoda melanoleuca (Giant panda) GN=PANDA_001323 PE=3 SV=1;tr|G1LJW1|G1LJW1_AILME Uncharacterized protein OS=Ailuropoda melanoleuca (Giant panda) GN=DDX3X PE=3 SV=1	---	2;2	2;2	2;2	2	2	2	2	5.5	68.066	613	613;675	0.0040816	4.2748				63	7568;8044	True;True	8213;8723	510259;510260;510261;510262;510263;510264;510265;510266;510267;510268;510269;542264;542265;542266;542267;542268;542269;542270	924754;924755;924756;924757;924758;924759;924760;924761;924762;924763;924764;983340;983341;983342;983343;983344;983345;983346;983347	924763;983341			O00571	DDX3X_HUMAN	ATP-dependent RNA helicase DDX3X OS=Homo sapiens (Human) GN=DDX3X PE=1 SV=3	2.4e-164	0.997	1	ok					13254	9975			10048	11421
37	D2HYH1	D2HYH1;D2GWW0;G1LKL6;G1M357	D2HYH1;D2GWW0;G1LKL6;G1M357	Putative uncharacterized protein	tr|D2HYH1|D2HYH1_AILME Putative uncharacterized protein OS=Ailuropoda melanoleuca (Giant panda) GN=PANDA_017769 PE=4 SV=1;tr|D2GWW0|D2GWW0_AILME Putative uncharacterized protein OS=Ailuropoda melanoleuca (Giant panda) GN=PANDA_001333 PE=4 SV=1;tr|G1LKL6|	---	4;4;4;4	4;4;4;4	4;4;4;4	4	4	4	4	45.4	10.656	97	97;103;120;129	0	13.77				64	597;4957;8820;8821	True;True;True;True	643;5324;9556;9557	41692;41693;41694;41695;41696;41697;41698;41699;41700;41701;41702;41703;336385;336386;336387;609327;609328;609329;609330;609331;609332;609333;609334	73140;73141;73142;73143;73144;73145;73146;73147;73148;73149;73150;73151;73152;73153;73154;73155;606450;606451;606452;1107066;1107067;1107068;1107069;1107070;1107071;1107072;1107073;1107074	73153;606451;1107072;1107073			O75964	ATP5L_HUMAN	ATP synthase subunit g, mitochondrial OS=Homo sapiens (Human) GN=ATP5L PE=1 SV=3	4.9e-41	0.907	0.979	ok			52701	50880				57990			59262
38	D2GX11	D2GX11;G1M029	D2GX11;G1M029	Putative uncharacterized protein	tr|D2GX11|D2GX11_AILME Putative uncharacterized protein OS=Ailuropoda melanoleuca (Giant panda) GN=PANDA_001392 PE=4 SV=1;tr|G1M029|G1M029_AILME Uncharacterized protein OS=Ailuropoda melanoleuca (Giant panda) GN=PDHB PE=4 SV=1	---	17;17	17;17	17;17	2	17	17	17	74.4	35.805	328	328;359	0	302.23				65	1215;1317;1472;1733;1734;1913;3267;4133;4195;6870;7002;8278;8387;8602;8868;9470;9612	True;True;True;True;True;True;True;True;True;True;True;True;True;True;True;True;True	1292;1399;1573;1845;1846;1847;1848;2040;2041;3483;4404;4473;4474;7469;7609;8970;8971;8972;9086;9318;9319;9606;10240;10241;10401	76040;76041;76042;76043;76044;76045;76046;76047;76048;76049;76050;76051;76052;76053;76054;76055;76056;76057;76058;76059;76060;76061;76062;76063;76064;76065;76066;76067;76068;76069;76070;76071;76072;76073;76074;76075;76076;76077;76078;76079;76080;76081;76082;76083;76084;76085;76086;76087;76088;76089;76090;76091;76092;76093;76094;76095;76096;76097;76098;76099;76100;76101;76102;76103;76104;76105;761…	130773;130774;130775;130776;130777;130778;130779;130780;130781;130782;130783;130784;130785;130786;130787;130788;130789;130790;130791;130792;130793;130794;130795;130796;130797;130798;130799;130800;130801;130802;130803;130804;130805;130806;130807;130808;130809;130810;130811;130812;130813;130814;130815;130816;130817;130818;130819;130820;130821;130822;130823;130824;130825;130826;130827;130828;130829;…	130814;141768;181405;209678;209745;225343;372945;499556;508144;858454;874302;1008164;1018786;1052474;1111671;1194289;1213525	33;34;35;36;37;38;39	12;102;237;243;253;279;301	P11177	ODPB_HUMAN	Pyruvate dehydrogenase E1 component subunit beta, mitochondrial OS=Homo sapiens (Human) GN=PDHB PE=1 SV=3	6.6e-187	0.976	0.997	ok	1989000	2144200	1677500	1790900	2828100	2917400	1797100	2206400	2468900	2369500	2226400
39	D2GX93	D2GX93;G1M430	D2GX93;G1M430	Putative uncharacterized protein	tr|D2GX93|D2GX93_AILME Putative uncharacterized protein OS=Ailuropoda melanoleuca (Giant panda) GN=PANDA_001500 PE=4 SV=1;tr|G1M430|G1M430_AILME Uncharacterized protein OS=Ailuropoda melanoleuca (Giant panda) GN=NAMPT PE=4 SV=1	---	2;2	2;2	2;2	2	2	2	2	8.7	53.518	472	472;494	0.0053908	4.1916				66	4066;7933	True;True	4331;8607	269115;532125	490733;961546	490733;961546			P43490	NAMPT_HUMAN	Nicotinamide phosphoribosyltransferase OS=Homo sapiens (Human) GN=NAMPT PE=1 SV=1	0	0.956	0.996	ok
40	D2GXA4	D2GXA4;G1M5U2	D2GXA4;G1M5U2	Dihydrolipoyl dehydrogenase	tr|D2GXA4|D2GXA4_AILME Dihydrolipoyl dehydrogenase OS=Ailuropoda melanoleuca (Giant panda) GN=PANDA_001513 PE=4 SV=1;tr|G1M5U2|G1M5U2_AILME Dihydrolipoyl dehydrogenase OS=Ailuropoda melanoleuca (Giant panda) GN=DLD PE=4 SV=1	---	17;17	17;17	17;17	2	17	17	17	43.4	53.381	502	502;509	0	246.75				67	76;126;494;525;1748;2693;3070;3856;4264;6392;7359;7514;8380;8709;8923;9121;9577	True;True;True;True;True;True;True;True;True;True;True;True;True;True;True;True;True	81;135;532;565;1862;2874;3270;3271;4106;4551;4552;6953;7985;8155;9079;9435;9663;9871;9872;10361	3619;3620;3621;3622;3623;3624;3625;3626;3627;3628;3629;3630;3631;3632;3633;3634;3635;3636;3637;3638;3639;3640;7643;7644;7645;7646;7647;7648;7649;7650;7651;7652;7653;7654;7655;7656;7657;7658;7659;7660;7661;7662;7663;7664;7665;7666;7667;7668;7669;7670;7671;7672;7673;7674;7675;7676;7677;7678;7679;7680;7681;7682;7683;7684;7685;7686;7687;7688;7689;7690;7691;7692;7693;7694;7695;7696;7697;7698;7699;7700…	5355;5356;5357;5358;5359;5360;5361;5362;5363;5364;5365;5366;5367;5368;5369;5370;5371;5372;5373;5374;5375;5376;5377;5378;5379;5380;5381;5382;5383;5384;13592;13593;13594;13595;13596;13597;13598;13599;13600;13601;13602;13603;13604;13605;13606;13607;13608;13609;13610;13611;13612;13613;13614;13615;13616;13617;13618;13619;13620;13621;13622;13623;13624;13625;13626;13627;13628;13629;13630;13631;13632;136…	5356;13683;59461;64889;211670;323081;354907;456303;515694;812525;909661;921833;1017923;1092040;1117150;1151610;1209674	40;41;42	354;431;456	P09622	DLDH_HUMAN	Dihydrolipoyl dehydrogenase, mitochondrial OS=Homo sapiens (Human) GN=DLD PE=1 SV=2	0	0.976	0.996	ok	1417200	1413200	2274300	2423500	2140600	2022400	2351500	2397300	2123800	2097600	1710300
41	D2GXF5	D2GXF5	D2GXF5	Uncharacterized protein	tr|D2GXF5|D2GXF5_AILME Uncharacterized protein OS=Ailuropoda melanoleuca (Giant panda) GN=FN1 PE=4 SV=1	FN1	5	5	5	1	5	5	5	2.8	271.95	2476	2476	0	22.924				68	3807;5284;7394;8779;9537	True;True;True;True;True	4054;5675;8022;9513;10313	248123;360506;360507;360508;501829;606040;606041;606042;606043;606044;606045;606046;606047;606048;606049;606050;606051;606052;606053;606054;606055;606056;606057;606058;606059;606060;606061;606062;606063;606064;606065;606066;606067;606068;606069;606070;606071;606072;662294;662295;662296;662297;662298;662299;662300;662301;662302;662303;662304;662305;662306;662307;662308;662309;662310;662311;662312;…	452998;663370;663371;663372;912298;1101015;1101016;1101017;1101018;1101019;1101020;1101021;1101022;1101023;1101024;1101025;1101026;1101027;1101028;1101029;1101030;1101031;1101032;1101033;1101034;1101035;1101036;1101037;1101038;1101039;1101040;1101041;1101042;1101043;1101044;1101045;1101046;1101047;1199924;1199925;1199926;1199927;1199928;1199929;1199930;1199931;1199932;1199933;1199934;1199935;1199…	452998;663371;912298;1101034;1199925			P02751	FINC_HUMAN	Fibronectin OS=Homo sapiens (Human) GN=FN1 PE=1 SV=4	0	0.911	0.947	ok	54963	64136	49678	43511	42749		45180	51378	46958	46370	58225
42	D2GXF6	D2GXF6;G1LAE5	D2GXF6;G1LAE5	Putative uncharacterized protein	tr|D2GXF6|D2GXF6_AILME Putative uncharacterized protein OS=Ailuropoda melanoleuca (Giant panda) GN=PANDA_001578 PE=3 SV=1;tr|G1LAE5|G1LAE5_AILME Uncharacterized protein OS=Ailuropoda melanoleuca (Giant panda) GN=ATIC PE=3 SV=1	---	24;23	24;23	24;23	2	24	24	24	54.8	64.083	586	586;593	0	134.46				69	197;258;458;459;596;1394;1649;2398;2416;3107;3733;5003;5634;5790;6438;6538;7256;7618;7883;8198;8334;8531;9579;9620	True;True;True;True;True;True;True;True;True;True;True;True;True;True;True;True;True;True;True;True;True;True;True;True	210;272;494;495;642;1481;1759;2561;2579;3310;3979;5375;6056;6225;7002;7104;7874;8266;8551;8884;9030;9240;10363;10409	11535;11536;11537;11538;11539;11540;11541;14258;14259;14260;14261;14262;14263;14264;14265;14266;14267;14268;14269;14270;14271;14272;14273;14274;14275;14276;14277;14278;14279;14280;14281;14282;14283;14284;14285;14286;14287;14288;14289;14290;32562;32563;32564;32565;32566;32567;32568;32569;32570;32571;32572;32573;32574;32575;32576;32577;32578;32579;32580;32581;32582;32583;32584;32585;32586;32587;325…	20441;20442;20443;20444;20445;20446;20447;24552;24553;24554;24555;24556;24557;24558;24559;24560;24561;24562;24563;24564;24565;24566;24567;24568;24569;24570;24571;24572;24573;24574;24575;24576;24577;24578;24579;24580;24581;24582;24583;24584;24585;24586;24587;24588;24589;24590;24591;24592;56839;56840;56841;56842;56843;56844;56845;56846;56847;56848;56849;56850;56851;56852;56853;56854;56855;56856;568…	20446;24578;56840;56884;73139;158803;201888;285130;286580;359383;444462;629175;705406;731366;815072;831909;897303;933052;957304;1000043;1014682;1040122;1209689;1214237			P31939	PUR9_HUMAN	Bifunctional purine biosynthesis protein PURH OS=Homo sapiens (Human) GN=ATIC PE=1 SV=3	0	0.954	0.997	OK	151440	105060	276670	281170	136890	62117	134840	187850	89989	171780	95773
43	D2GXJ5	D2GXJ5;G1MID5	D2GXJ5;G1MID5	Putative uncharacterized protein	tr|D2GXJ5|D2GXJ5_AILME Putative uncharacterized protein OS=Ailuropoda melanoleuca (Giant panda) GN=PANDA_001626 PE=4 SV=1;tr|G1MID5|G1MID5_AILME Uncharacterized protein OS=Ailuropoda melanoleuca (Giant panda) GN=MYPN PE=4 SV=1	---	5;5	5;5	5;5	2	5	5	5	5	144.88	1320	1320;1321	0.0014577	5.6682				70	20;630;1461;2320;5724	True;True;True;True;True	21;680;1561;2479;6154	891;892;893;894;895;896;897;43283;98756;98757;151559;151560;151561;151562;151563;151564;151565;151566;151567;151568;151569;151570;151571;151572;151573;151574;151575;151576;151577;151578;151579;151580;151581;151582;151583;151584;151585;151586;151587;151588;151589;151590;151591;394233;394234;394235;394236;394237	1230;1231;1232;1233;1234;1235;1236;1237;75313;180772;180773;278479;278480;278481;278482;278483;278484;278485;278486;278487;278488;278489;278490;278491;278492;278493;278494;278495;278496;278497;278498;278499;278500;278501;278502;278503;278504;278505;278506;278507;278508;278509;278510;278511;721870;721871;721872;721873;721874	1234;75313;180772;278479;721873			Q86TC9	MYPN_HUMAN	Myopalladin OS=Homo sapiens (Human) GN=MYPN PE=1 SV=2	0	0.936	0.97	not checked	59049	18635			29329		36646	42554	44283
44	D2GXN9	D2GXN9;G1L6E2	D2GXN9;G1L6E2	Putative uncharacterized protein	tr|D2GXN9|D2GXN9_AILME Putative uncharacterized protein OS=Ailuropoda melanoleuca (Giant panda) GN=PANDA_001685 PE=3 SV=1;tr|G1L6E2|G1L6E2_AILME Uncharacterized protein OS=Ailuropoda melanoleuca (Giant panda) GN=HADHA PE=3 SV=1	---	25;25	25;25	25;25	2	25	25	25	43.9	81.311	748	748;763	0	323.31				71	150;475;530;1010;1273;1612;2132;2551;2991;3304;3631;4170;4823;4864;5921;6155;6237;6270;6720;7501;8189;8219;8251;8550;8995	True;True;True;True;True;True;True;True;True;True;True;True;True;True;True;True;True;True;True;True;True;True;True;True;True	160;161;511;570;1080;1355;1719;2274;2724;3189;3523;3864;4445;5174;5217;6368;6369;6641;6642;6761;6762;6814;6815;7312;7313;8139;8875;8906;8940;9260;9738	8954;8955;8956;8957;8958;8959;8960;8961;8962;8963;8964;8965;8966;8967;8968;8969;8970;8971;8972;8973;8974;8975;8976;8977;8978;8979;8980;8981;8982;8983;8984;8985;8986;8987;8988;8989;8990;8991;8992;8993;8994;8995;8996;8997;8998;8999;9000;33690;33691;33692;33693;33694;33695;33696;33697;33698;33699;33700;33701;33702;33703;33704;33705;33706;33707;33708;33709;33710;33711;33712;33713;37549;37550;37551;37…	15866;15867;15868;15869;15870;15871;15872;15873;15874;15875;15876;15877;15878;15879;15880;15881;15882;15883;15884;15885;15886;15887;15888;15889;15890;15891;15892;15893;15894;15895;15896;15897;15898;15899;15900;15901;15902;15903;15904;15905;15906;15907;15908;15909;15910;15911;15912;15913;15914;15915;15916;15917;15918;15919;15920;15921;15922;15923;58750;58751;58752;58753;58754;58755;58756;58757;587…	15870;58767;65977;111225;136699;196857;256977;309886;349691;378187;433270;504592;587744;593112;752648;782273;792754;797648;851589;921019;999403;1001272;1005250;1041813;1125452	43;44;45;46;47;48	176;200;258;428;491;637	P40939	ECHA_HUMAN	Trifunctional enzyme subunit alpha, mitochondrial OS=Homo sapiens (Human) GN=HADHA PE=1 SV=2	0	0.908	0.975	OK	1221100	1254600	2092300	2263500	2037700	1992900	2121300	2110700	2117400	2085300	1201000
45	D2GXP0	D2GXP0	D2GXP0	Uncharacterized protein	tr|D2GXP0|D2GXP0_AILME Uncharacterized protein OS=Ailuropoda melanoleuca (Giant panda) GN=RAB10 PE=3 SV=1	RAB10	2	1	1	1	2	1	1	11	22.541	200	200	0.0099875	3.3325				72	251;5489	True;False	264;5891	13949;13950;13951;13952;13953;13954;13955;13956;13957;13958;13959;13960;13961;13962;13963;13964;13965;13966;13967;13968;13969;13970;13971;13972;13973;13974;13975;13976;13977;13978;13979;13980;13981;13982;13983;13984;374786;374787;374788;374789;374790;374791;374792;374793;374794;374795;374796;374797;374798;374799;374800;374801;374802;374803;374804;374805;374806;374807;374808;374809;374810;374811;3…	24153;24154;24155;24156;24157;24158;24159;24160;24161;24162;24163;24164;24165;24166;24167;24168;24169;24170;24171;24172;24173;24174;24175;24176;24177;24178;24179;24180;24181;24182;24183;24184;24185;24186;24187;24188;24189;24190;24191;687644;687645;687646;687647;687648;687649;687650;687651;687652;687653;687654;687655;687656;687657;687658;687659;687660;687661;687662;687663;687664;687665;687666;6876…	24184;687663			P61026	RAB10_HUMAN	Ras-related protein Rab-10 OS=Homo sapiens (Human) GN=RAB10 PE=1 SV=1	6.4e-88	1	1	ok	39300	39875	33971	34272	19809	21840	50152	50196			37442
46	D2GXR5	D2GXR5;F2X201	D2GXR5;F2X201	Putative uncharacterized protein	tr|D2GXR5|D2GXR5_AILME Putative uncharacterized protein OS=Ailuropoda melanoleuca (Giant panda) GN=PANDA_001716 PE=3 SV=1;tr|F2X201|F2X201_AILME 40S ribosomal protein S3a OS=Ailuropoda melanoleuca (Giant panda) GN=RPS3A PE=2 SV=1	---	5;5	5;5	5;5	2	5	5	5	20.6	27.735	243	243;264	0	6.7869				74	115;598;5159;5350;8503	True;True;True;True;True	124;644;5542;5747;9210	7133;7134;7135;7136;7137;7138;7139;7140;7141;7142;7143;7144;7145;7146;7147;7148;7149;41704;41705;41706;41707;352250;352251;352252;352253;352254;352255;364942;364943;364944;364945;364946;570629;570630;570631;570632;570633;570634;570635;570636;570637;570638;570639;570640;570641;570642;570643;570644;570645;570646;570647;570648;570649;570650	12824;12825;12826;12827;12828;12829;12830;12831;12832;12833;12834;12835;12836;12837;12838;12839;12840;73156;73157;73158;73159;644560;644561;644562;644563;644564;644565;670371;670372;670373;670374;670375;1030763;1030764;1030765;1030766;1030767;1030768;1030769;1030770;1030771;1030772;1030773;1030774;1030775;1030776;1030777;1030778;1030779;1030780;1030781;1030782;1030783;1030784	12836;73158;644560;670375;1030776			P61247	RS3A_HUMAN	40S ribosomal protein S3a OS=Homo sapiens (Human) GN=RPS3A PE=1 SV=2	8.8e-139	1	1	ok			37671	33560	34277	38778	34747	36020	38169
47	D2GXT4	D2GXT4	D2GXT4	Putative uncharacterized protein	tr|D2GXT4|D2GXT4_AILME Putative uncharacterized protein OS=Ailuropoda melanoleuca (Giant panda) GN=PANDA_001739 PE=4 SV=1	---	23	23	1	1	23	23	1	62.1	50.847	449	449	0	237.72				75	1458;1774;1793;3376;3597;4325;4352;4353;4534;4863;5145;6423;6769;6923;6988;6989;7643;7969;8402;9639;9793;10015;10140	True;True;True;True;True;True;True;True;True;True;True;True;True;True;True;True;True;True;True;True;True;True;True	1558;1891;1910;3598;3828;3829;4619;4649;4650;4651;4850;5216;5526;6984;7364;7523;7594;7595;8291;8643;9101;10428;10591;10829;10963;10964	98626;98627;98628;98629;98630;98631;98632;98633;98634;98635;98636;98637;98638;98639;98640;98641;116477;116478;116479;116480;116481;116482;116483;116484;116485;116486;116487;116488;116489;116490;116491;116492;116493;116494;116495;116496;116497;117055;117056;117057;117058;117059;117060;117061;117062;117063;117064;117065;117066;117067;214228;234792;234793;234794;234795;234796;234797;234798;234799;23…	180590;180591;180592;180593;180594;180595;180596;180597;180598;180599;180600;180601;180602;180603;180604;180605;180606;180607;180608;213540;213541;213542;213543;213544;213545;213546;213547;213548;213549;213550;213551;213552;213553;213554;213555;213556;213557;213558;213559;213560;213561;213562;214363;214364;214365;214366;214367;214368;214369;214370;214371;214372;214373;214374;214375;214376;214377;…	180604;213552;214374;389654;429667;525570;527740;527802;555239;593098;643391;814316;854277;864036;872016;872097;935128;964265;1020089;1216139;1237749;1256493;1266506	49;50;51;52	178;293;414;426	P02675	FIBB_HUMAN	Fibrinogen beta chain OS=Homo sapiens (Human) GN=FGB PE=1 SV=2	3.3e-175	0.891	0.98	ok	1349700	1668200	2555500	2799100	434900	503250	667460	644250	458210	844010	1594200
48	G1MJI0	G1MJI0;D2GXT5	G1MJI0;D2GXT5	Uncharacterized protein	tr|G1MJI0|G1MJI0_AILME Uncharacterized protein OS=Ailuropoda melanoleuca (Giant panda) GN=FGA PE=4 SV=1;tr|D2GXT5|D2GXT5_AILME Putative uncharacterized protein OS=Ailuropoda melanoleuca (Giant panda) GN=PANDA_001740 PE=4 SV=1	FGA	19;19	19;19	19;19	2	19	19	19	24.2	94.247	865	865;883	0	266.02				76	38;620;1405;1567;2318;2406;2509;2900;3672;4839;6577;6652;6976;7062;7873;8259;8987;9265;10127	True;True;True;True;True;True;True;True;True;True;True;True;True;True;True;True;True;True;True	40;669;670;1492;1670;1671;2477;2569;2679;3092;3909;5191;7156;7236;7582;7671;8541;8951;9729;10029;10950	1778;1779;1780;1781;1782;1783;1784;1785;1786;1787;1788;1789;1790;1791;1792;1793;1794;1795;1796;1797;1798;1799;1800;1801;1802;1803;1804;1805;1806;1807;1808;1809;1810;1811;1812;1813;1814;1815;1816;1817;1818;1819;1820;1821;1822;1823;1824;1825;1826;1827;1828;1829;1830;1831;1832;1833;1834;1835;1836;1837;1838;1839;1840;1841;1842;1843;1844;1845;1846;1847;1848;1849;1850;1851;1852;1853;1854;1855;1856;1857…	2662;2663;2664;2665;2666;2667;2668;2669;2670;2671;2672;2673;2674;2675;2676;2677;2678;2679;2680;2681;2682;2683;2684;2685;2686;2687;2688;2689;2690;2691;2692;2693;2694;2695;2696;2697;2698;2699;2700;2701;2702;2703;2704;2705;2706;2707;2708;2709;2710;2711;2712;2713;2714;2715;2716;2717;2718;2719;2720;2721;2722;2723;2724;2725;2726;2727;2728;2729;2730;2731;2732;2733;2734;2735;2736;2737;2738;2739;2740;2741…	2716;74434;159465;189597;278475;285742;301842;342973;436743;589337;840191;846532;871596;880568;956255;1005749;1123560;1171747;1265613	53;54;55	110;254;257	P02671	FIBA_HUMAN	Fibrinogen alpha chain OS=Homo sapiens (Human) GN=FGA PE=1 SV=2	5.8e-142	0.742	0.868	ok	1815200	1781700	2609000	2801400	708010	735240	885370	811220	895290	855930	1815800
49	D2GXX9	D2GXX9	D2GXX9	Uncharacterized protein	tr|D2GXX9|D2GXX9_AILME Uncharacterized protein OS=Ailuropoda melanoleuca (Giant panda) GN=USMG5 PE=4 SV=1	USMG5	2	2	2	1	2	2	2	43.1	6.4576	58	58	0	8.3379				77	317;9864	True;True	341;10671	23924;23925;23926;23927;23928;23929;23930;23931;23932;23933;23934;23935;23936;23937;23938;23939;23940;23941;23942;23943;23944;684300;684301;684302;684303	42931;42932;42933;42934;42935;42936;42937;42938;42939;42940;42941;42942;42943;42944;42945;42946;42947;42948;42949;42950;42951;42952;42953;42954;42955;42956;1243537;1243538;1243539;1243540;1243541	42952;1243538			Q96IX5	USMG5_HUMAN	Up-regulated during skeletal muscle growth protein 5 OS=Homo sapiens (Human) GN=USMG5 PE=1 SV=1	4.7e-30	0.914	1	ok		70048	67340	72248							86789
50	D2GXZ4	D2GXZ4;G1MEB0	D2GXZ4;G1MEB0	Pyruvate dehydrogenase E1 component subunit alpha	tr|D2GXZ4|D2GXZ4_AILME Pyruvate dehydrogenase E1 component subunit alpha OS=Ailuropoda melanoleuca (Giant panda) GN=PANDA_001830 PE=4 SV=1;tr|G1MEB0|G1MEB0_AILME Pyruvate dehydrogenase E1 component subunit alpha OS=Ailuropoda melanoleuca (Giant panda) GN	---	24;24	24;24	24;24	2	24	24	24	63.7	39.411	353	353;390	0	313.3				78	10;11;343;1844;1973;1974;1991;2858;2895;2957;3261;4587;5086;5616;6274;6275;6276;6418;7291;7489;7683;8447;8738;9882	True;True;True;True;True;True;True;True;True;True;True;True;True;True;True;True;True;True;True;True;True;True;True;True	11;12;367;1964;2104;2105;2122;3049;3087;3154;3476;3477;4906;5465;6038;6820;6821;6822;6823;6824;6979;7913;8127;8333;8334;9151;9467;9468;10689;10690	392;393;394;395;396;397;398;399;400;401;402;403;404;405;406;407;408;409;410;411;412;413;414;415;416;417;418;419;420;421;422;423;424;425;426;427;428;429;430;431;432;433;434;435;436;437;438;25436;25437;25438;25439;25440;25441;25442;25443;25444;25445;25446;25447;25448;25449;25450;25451;25452;25453;25454;25455;25456;25457;25458;25459;25460;25461;25462;25463;25464;25465;118945;118946;118947;118948;118…	501;502;503;504;505;506;507;508;509;510;511;512;513;514;515;516;517;518;519;520;521;522;523;524;525;526;527;528;529;530;531;532;533;534;535;536;537;538;539;540;541;542;543;544;545;546;547;548;549;550;45121;45122;45123;45124;45125;45126;45127;45128;45129;45130;45131;45132;45133;45134;45135;45136;45137;45138;45139;45140;45141;45142;45143;45144;45145;45146;45147;45148;45149;45150;45151;217086;217087…	501;517;45145;217092;230035;230065;231693;339800;342712;347229;372776;561048;637326;705037;797776;797830;797930;813966;901625;920370;939264;1025154;1095930;1245677	56;57;58;59	192;220;245;287	P08559	ODPA_HUMAN	Pyruvate dehydrogenase E1 component subunit alpha, somatic form, mitochondrial OS=Homo sapiens (Human) GN=PDHA1 PE=1 SV=3	2.9e-181	0.986	1	ok	1262300	1335400	1778100	1665500	1378200	1239200	1552300	1299500	1757000	1620300	1201700
51	D2GY30	D2GY30;G1L0F5	D2GY30;G1L0F5	Putative uncharacterized protein	tr|D2GY30|D2GY30_AILME Putative uncharacterized protein OS=Ailuropoda melanoleuca (Giant panda) GN=PANDA_001864 PE=4 SV=1;tr|G1L0F5|G1L0F5_AILME Uncharacterized protein OS=Ailuropoda melanoleuca (Giant panda) GN=YWHAZ PE=3 SV=1	---	10;10	8;8	7;7	2	10	8	7	51.1	26.084	229	229;245	0	65.641				79	1303;1574;2170;2639;3114;6117;6523;8052;9613;9948	True;False;True;True;True;True;False;True;True;True	1385;1678;1679;2316;2816;3318;6582;6583;7088;8731;10402;10757	80764;80765;80766;80767;80768;80769;80770;80771;80772;80773;80774;80775;80776;80777;80778;80779;80780;80781;80782;80783;80784;80785;80786;80787;80788;80789;80790;80791;80792;80793;80794;80795;80796;80797;80798;80799;80800;80801;80802;80803;80804;80805;80806;80807;80808;80809;80810;80811;80812;80813;80814;104181;104182;104183;104184;104185;104186;104187;104188;104189;104190;104191;104192;104193;10…	138296;138297;138298;138299;138300;138301;138302;138303;138304;138305;138306;138307;138308;138309;138310;138311;138312;138313;138314;138315;138316;138317;138318;138319;138320;138321;138322;138323;138324;138325;138326;138327;138328;138329;138330;138331;138332;138333;138334;138335;138336;138337;138338;138339;138340;138341;138342;138343;138344;138345;138346;138347;138348;138349;138350;138351;138352;…	138313;190161;260448;318589;360698;771558;826189;983744;1213591;1250513	30	218	P63104	1433Z_HUMAN	14-3-3 protein zeta/delta OS=Homo sapiens (Human) GN=YWHAZ PE=1 SV=1	1.4e-119	0.991	0.996	not checked	140280	143520	110820	145340	169700	171640	108710	56286	139320	129770	63708
52	D2GY67	D2GY67;G1LPW6	D2GY67;G1LPW6;G1MAJ7;G1MAK4;D2GX34	Putative uncharacterized protein	tr|D2GY67|D2GY67_AILME Putative uncharacterized protein OS=Ailuropoda melanoleuca (Giant panda) GN=PANDA_001912 PE=4 SV=1;tr|G1LPW6|G1LPW6_AILME Uncharacterized protein OS=Ailuropoda melanoleuca (Giant panda) GN=ACSL1 PE=4 SV=1	---	29;28;2;2;2	29;28;2;2;2	29;28;2;2;2	5	29	29	29	46.3	77.892	698	698;699;683;693;693	0	173.4				80	204;373;587;994;1552;2959;3101;3106;3910;3940;3941;3976;4079;4381;4937;5500;5556;5960;6221;6233;6479;6587;7204;7860;7861;8048;9558;9717;9725	True;True;True;True;True;True;True;True;True;True;True;True;True;True;True;True;True;True;True;True;True;True;True;True;True;True;True;True;True	217;400;633;1064;1654;3156;3302;3308;3309;4169;4201;4202;4239;4346;4680;4681;5303;5902;5903;5972;5973;6409;6410;6741;6755;7044;7167;7820;8528;8529;8727;10339;10510;10518	11779;11780;11781;11782;11783;11784;11785;11786;11787;11788;11789;11790;11791;11792;11793;11794;11795;11796;11797;11798;11799;11800;11801;11802;11803;11804;11805;11806;11807;11808;11809;11810;11811;11812;11813;11814;11815;11816;11817;11818;11819;11820;11821;11822;11823;11824;11825;11826;11827;11828;11829;11830;11831;11832;11833;11834;11835;11836;11837;11838;11839;11840;11841;11842;11843;11844;118…	20758;20759;20760;20761;20762;20763;20764;20765;20766;20767;20768;20769;20770;20771;20772;20773;20774;20775;20776;20777;20778;20779;20780;20781;20782;20783;20784;20785;20786;20787;20788;20789;20790;20791;20792;20793;20794;20795;20796;20797;20798;20799;20800;20801;20802;20803;20804;20805;20806;20807;20808;20809;20810;20811;20812;20813;20814;20815;20816;20817;20818;20819;20820;20821;20822;20823;208…	20793;48232;69198;110616;188877;347324;358875;359334;466615;468342;468396;475901;491975;530479;599816;688611;699932;756718;788998;789339;817351;840440;892137;955765;955800;983459;1206518;1227767;1228215	60;61;62;63	325;431;497;674	P33121	ACSL1_HUMAN	Long-chain-fatty-acid--CoA ligase 1 OS=Homo sapiens (Human) GN=ACSL1 PE=1 SV=1	0	0.94	0.986	OK	562470	615270	1571400	1538800	1322200	1125200	1193900	1190100	1049600	1063700	748170
53	D2GY69	D2GY69;G1LQ74	D2GY69;G1LQ74;D2HIW8;G1L752;G1L404	Putative uncharacterized protein	tr|D2GY69|D2GY69_AILME Putative uncharacterized protein OS=Ailuropoda melanoleuca (Giant panda) GN=PANDA_001915 PE=3 SV=1;tr|G1LQ74|G1LQ74_AILME Uncharacterized protein OS=Ailuropoda melanoleuca (Giant panda) GN=SLC25A4 PE=3 SV=1	---	19;18;3;3;2	19;18;3;3;2	11;10;1;1;0	5	19	19	11	67.4	31.74	288	288;298;318;323;249	0	323.31				81	102;1214;1881;2237;2830;2831;2871;3216;3233;4606;4877;5497;6206;6707;7015;8082;9058;9851;9865	True;True;True;True;True;True;True;True;True;True;True;True;True;True;True;True;True;True;True	108;1291;2005;2389;3019;3020;3021;3062;3426;3427;3447;4925;4926;5233;5899;6717;6718;6719;7298;7623;8764;9808;10657;10672	5015;5016;5017;5018;5019;5020;5021;5022;5023;5024;5025;5026;5027;5028;5029;5030;5031;5032;5033;5034;5035;5036;5037;5038;5039;5040;5041;5042;5043;5044;5045;5046;5047;5048;5049;5050;5051;5052;5053;75852;75853;75854;75855;75856;75857;75858;75859;75860;75861;75862;75863;75864;75865;75866;75867;75868;75869;75870;75871;75872;75873;75874;75875;75876;75877;75878;75879;75880;75881;75882;75883;75884;75885;…	8021;8022;8023;8024;8025;8026;8027;8028;8029;8030;8031;8032;8033;8034;8035;8036;8037;8038;8039;8040;8041;8042;8043;8044;8045;8046;8047;8048;8049;8050;8051;8052;8053;8054;8055;8056;8057;8058;8059;8060;8061;8062;8063;8064;8065;8066;8067;8068;8069;8070;8071;8072;8073;8074;8075;8076;8077;8078;8079;8080;8081;8082;8083;8084;8085;8086;8087;8088;8089;8090;8091;8092;8093;8094;8095;8096;8097;8098;8099;8100…				P12235	ADT1_HUMAN	ADP/ATP translocase 1 OS=Homo sapiens (Human) GN=SLC25A4 PE=1 SV=4	8.4e-141	0.976	0.993	ok	11200000	11195000	12779000	13451000	16010000	20030000	10627000	10153000	12839000	12344000	12249000
54	D2GY82	D2GY82;G1LBM5	D2GY82;G1LBM5	Reticulon	tr|D2GY82|D2GY82_AILME Reticulon OS=Ailuropoda melanoleuca (Giant panda) GN=PANDA_001932 PE=4 SV=1;tr|G1LBM5|G1LBM5_AILME Reticulon OS=Ailuropoda melanoleuca (Giant panda) GN=RTN4 PE=4 SV=1	---	3;3	3;3	3;3	2	3	3	3	3.7	100.95	922	922;1009	0	11.37				82	3452;5183;10046	True;True;True	3679;5567;10863	220011;220012;220013;220014;220015;220016;220017;220018;220019;220020;220021;220022;220023;220024;220025;353099;353100;353101;353102;353103;353104;353105;694174;694175;694176;694177;694178;694179;694180;694181;694182;694183;694184;694185;694186;694187;694188;694189;694190;694191;694192;694193;694194;694195;694196;694197;694198;694199;694200;694201;694202;694203;694204;694205;694206;694207;694208;…	401744;401745;401746;401747;401748;401749;401750;401751;401752;401753;401754;401755;401756;401757;401758;401759;401760;401761;401762;401763;401764;401765;646176;646177;646178;646179;646180;646181;646182;1259904;1259905;1259906;1259907;1259908;1259909;1259910;1259911;1259912;1259913;1259914;1259915;1259916;1259917;1259918;1259919;1259920;1259921;1259922;1259923;1259924;1259925;1259926;1259927;1259…	401752;646181;1259922			Q9NQC3	RTN4_HUMAN	Reticulon-4 OS=Homo sapiens (Human) GN=RTN4 PE=1 SV=2	0	0.818	0.929	ok	56626	50863	44749	60799	67778	59280	56678	68534	64443	63272
55	D2GYA1	D2GYA1;G1LMF3	D2GYA1;G1LMF3	Putative uncharacterized protein	tr|D2GYA1|D2GYA1_AILME Putative uncharacterized protein OS=Ailuropoda melanoleuca (Giant panda) GN=PANDA_001953 PE=4 SV=1;tr|G1LMF3|G1LMF3_AILME Uncharacterized protein OS=Ailuropoda melanoleuca (Giant panda) GN=THY1 PE=4 SV=1	---	3;3	3;3	3;3	2	3	3	3	29.9	13.23	117	117;161	0	8.2142				83	5799;9189;9523	True;True;True	6234;9946;10299	400723;400724;400725;400726;400727;400728;400729;400730;400731;400732;400733;400734;400735;400736;638443;638444;638445;638446;638447;638448;638449;638450;638451;661471;661472;661473;661474;661475	732178;732179;732180;732181;732182;732183;732184;732185;732186;732187;732188;732189;732190;732191;732192;1161114;1161115;1161116;1161117;1161118;1161119;1161120;1161121;1161122;1161123;1161124;1198800;1198801;1198802;1198803;1198804	732179;1161122;1198804			P04216	THY1_HUMAN	Thy-1 membrane glycoprotein OS=Homo sapiens (Human) GN=THY1 PE=1 SV=2	3.9e-42	0.812	0.94	not checked					110560	76837	44938		66681	58868
56	D2GYC0	D2GYC0	D2GYC0;D2I4H6;Q506P8;G1LF23	Uncharacterized protein	tr|D2GYC0|D2GYC0_AILME Uncharacterized protein OS=Ailuropoda melanoleuca (Giant panda) GN=HSPA8 PE=3 SV=1	HSPA8	37;6;3;2	37;6;3;2	24;4;0;2	4	37	37	24	58.8	70.897	646	646;268;52;518	0	323.31				84	689;1025;1110;1111;1470;1963;2482;2508;2516;3247;3403;3741;4058;4059;4398;4399;5025;5331;5507;5807;6180;6273;6628;6631;6651;6694;7197;7284;7583;7645;7863;7927;8522;8567;8715;8811;9349	True;True;True;True;True;True;True;True;True;True;True;True;True;True;True;True;True;True;True;True;True;True;True;True;True;True;True;True;True;True;True;True;True;True;True;True;True	742;1095;1185;1186;1571;2094;2649;2678;2686;3461;3626;3988;4323;4324;4700;4701;5397;5727;5910;6242;6676;6677;6818;6819;7208;7211;7212;7234;7235;7282;7813;7904;7905;8228;8294;8531;8601;9231;9280;9441;9547;10118	46299;46300;46301;46302;46303;46304;46305;46306;46307;46308;46309;46310;46311;46312;46313;46314;46315;46316;46317;46318;46319;46320;46321;46322;46323;46324;46325;46326;46327;46328;46329;46330;46331;46332;46333;46334;46335;46336;46337;46338;46339;46340;46341;46342;46343;46344;46345;46346;46347;46348;46349;46350;46351;46352;46353;46354;46355;46356;46357;46358;46359;46360;46361;46362;46363;46364;463…	79987;79988;79989;79990;79991;79992;79993;79994;79995;79996;79997;79998;79999;80000;80001;80002;80003;80004;80005;80006;80007;80008;80009;80010;80011;80012;80013;80014;80015;80016;80017;80018;80019;80020;80021;80022;80023;80024;80025;80026;80027;80028;80029;80030;80031;80032;80033;80034;80035;80036;80037;80038;80039;80040;80041;80042;80043;80044;80045;80046;80047;80048;80049;80050;80051;80052;800…	80040;112217;121437;121507;181319;229595;294537;301744;303300;371895;396043;444903;489582;489843;531519;531546;631463;668307;689107;733028;785165;797687;844036;844467;846465;849493;891570;900492;930479;935358;955874;961221;1039635;1048729;1092452;1105313;1181261	65;66;67;68;69;70	61;87;93;127;237;549	P11142	HSP7C_HUMAN	Heat shock cognate 71 kDa protein OS=Homo sapiens (Human) GN=HSPA8 PE=1 SV=1	0	1	1	ok	3739500	3709300	5078200	5425000	4702100	4492300	5142600	5285300	4736600	4794000	4295200
57	D2GYI0	D2GYI0;G1LAM8	D2GYI0;G1LAM8	Putative uncharacterized protein	tr|D2GYI0|D2GYI0_AILME Putative uncharacterized protein OS=Ailuropoda melanoleuca (Giant panda) GN=PANDA_002058 PE=4 SV=1;tr|G1LAM8|G1LAM8_AILME Uncharacterized protein OS=Ailuropoda melanoleuca (Giant panda) GN=SPTB PE=4 SV=1	---	3;3	3;3	3;3	2	3	3	3	2.1	269.46	2342	2342;2370	0.0066667	4.151				85	2622;5950;7069	True;True;True	2799;6398;7678	171584;171585;412779;483059;483060;483061;483062;483063;483064;483065;483066;483067;483068;483069;483070;483071;483072	316580;316581;755670;881251;881252;881253;881254;881255;881256;881257;881258;881259;881260;881261;881262;881263;881264	316580;755670;881256			Q01082	SPTB2_HUMAN	Spectrin beta chain, non-erythrocytic 1 OS=Homo sapiens (Human) GN=SPTBN1 PE=1 SV=2	0	0.589	0.833	ok	21508	16272			6165.4		6001.7
58	D2GYI3	D2GYI3	D2GYI3	Uncharacterized protein	tr|D2GYI3|D2GYI3_AILME Uncharacterized protein OS=Ailuropoda melanoleuca (Giant panda) GN=HSPA2 PE=3 SV=1	HSPA2	22	9	9	1	22	9	9	35.7	69.808	636	636	0	19.802				86	689;1113;1470;1962;2508;3245;4058;4059;4398;4399;5024;5331;5507;6621;6630;6694;7202;7927;8149;8522;8714;8811	False;True;False;True;False;True;False;False;False;False;True;False;False;True;True;False;True;False;True;False;True;False	742;1188;1571;2093;2678;3459;4323;4324;4700;4701;5396;5727;5910;7201;7210;7282;7818;8601;8833;9231;9440;9547	46299;46300;46301;46302;46303;46304;46305;46306;46307;46308;46309;46310;46311;46312;46313;46314;46315;46316;46317;46318;46319;46320;46321;46322;46323;46324;46325;46326;46327;46328;46329;46330;46331;46332;46333;46334;46335;46336;46337;46338;46339;46340;46341;46342;46343;46344;46345;46346;46347;46348;46349;46350;46351;46352;46353;46354;46355;46356;46357;46358;46359;46360;46361;46362;46363;46364;463…	79987;79988;79989;79990;79991;79992;79993;79994;79995;79996;79997;79998;79999;80000;80001;80002;80003;80004;80005;80006;80007;80008;80009;80010;80011;80012;80013;80014;80015;80016;80017;80018;80019;80020;80021;80022;80023;80024;80025;80026;80027;80028;80029;80030;80031;80032;80033;80034;80035;80036;80037;80038;80039;80040;80041;80042;80043;80044;80045;80046;80047;80048;80049;80050;80051;80052;800…	80040;121511;181319;229569;301744;371873;489582;489843;531519;531546;631452;668307;689107;843309;844320;849493;892122;961221;994871;1039635;1092428;1105313			P54652	HSP72_HUMAN	Heat shock-related 70 kDa protein 2 OS=Homo sapiens (Human) GN=HSPA2 PE=1 SV=1	0	0.991	0.994	ok							36227		34604
59	D2GYK6	D2GYK6;G1LJF6	D2GYK6;G1LJF6	Putative uncharacterized protein	tr|D2GYK6|D2GYK6_AILME Putative uncharacterized protein OS=Ailuropoda melanoleuca (Giant panda) GN=PANDA_002088 PE=3 SV=1;tr|G1LJF6|G1LJF6_AILME Uncharacterized protein OS=Ailuropoda melanoleuca (Giant panda) GN=ALDH9A1 PE=3 SV=1	---	6;6	6;6	6;6	2	6	6	6	11.5	56.056	513	513;515	0	21.114				87	1992;2390;3093;3968;4156;9398	True;True;True;True;True;True	2123;2553;3294;4229;4431;10168	127172;127173;127174;127175;127176;127177;127178;155312;155313;155314;155315;155316;155317;155318;155319;155320;155321;155322;155323;155324;155325;155326;155327;155328;196230;196231;196232;196233;196234;258572;258573;258574;258575;258576;258577;258578;258579;258580;258581;258582;258583;258584;258585;258586;258587;258588;258589;258590;258591;258592;258593;258594;258595;275545;275546;275547;275548;…	231703;231704;231705;231706;231707;231708;231709;284954;284955;284956;284957;284958;284959;284960;284961;284962;284963;284964;284965;284966;284967;284968;284969;284970;357136;357137;357138;357139;357140;471103;471104;471105;471106;471107;471108;471109;471110;471111;471112;471113;471114;471115;471116;471117;471118;471119;471120;471121;471122;471123;471124;471125;471126;502796;502797;502798;502799;…	231706;284954;357138;471118;502800;1187452			P49189	AL9A1_HUMAN	4-trimethylaminobutyraldehyde dehydrogenase OS=Homo sapiens (Human) GN=ALDH9A1 PE=1 SV=3	0	0.917	0.964	ok			45557	56393			45878	49802	30475	32534
60	D2GZ63	D2GZ63;G1KZV4	D2GZ63;G1KZV4	Clusterin	tr|D2GZ63|D2GZ63_AILME Clusterin OS=Ailuropoda melanoleuca (Giant panda) GN=PANDA_002353 PE=3 SV=1;tr|G1KZV4|G1KZV4_AILME Clusterin OS=Ailuropoda melanoleuca (Giant panda) GN=CLU PE=3 SV=1	---	6;6	6;6	6;6	2	6	6	6	18.4	47.921	413	413;447	0	11.992				89	2224;3850;5163;6050;8337;9425	True;True;True;True;True;True	2376;4100;5546;6500;9033;10195	145252;145253;145254;250023;250024;250025;250026;250027;250028;250029;250030;250031;250032;250033;250034;250035;250036;250037;250038;250039;250040;250041;250042;250043;250044;250045;250046;250047;250048;250049;250050;352361;418713;418714;418715;418716;418717;560411;655742;655743;655744;655745;655746;655747;655748;655749;655750;655751;655752;655753;655754;655755;655756	266207;266208;266209;455966;455967;455968;455969;455970;455971;455972;455973;455974;455975;455976;455977;455978;455979;455980;455981;455982;455983;455984;455985;455986;455987;455988;455989;455990;455991;455992;455993;644938;766851;766852;766853;766854;766855;1014693;1190615;1190616;1190617;1190618;1190619;1190620;1190621;1190622;1190623;1190624;1190625;1190626;1190627;1190628;1190629	266208;455968;644938;766852;1014693;1190622			P10909	CLUS_HUMAN	Clusterin OS=Homo sapiens (Human) GN=CLU PE=1 SV=1	3.9e-163	0.781	0.93	ok	30067		36131	33532	45666	42021		37006	39254	39276	45667
61	D2GZ72	D2GZ72;G1L094	D2GZ72;G1L094;D2H6W5;G1LGH8	Putative uncharacterized protein	tr|D2GZ72|D2GZ72_AILME Putative uncharacterized protein OS=Ailuropoda melanoleuca (Giant panda) GN=PANDA_002362 PE=4 SV=1;tr|G1L094|G1L094_AILME Uncharacterized protein OS=Ailuropoda melanoleuca (Giant panda) GN=DPYSL2 PE=4 SV=1	---	7;7;1;1	7;7;1;1	7;7;1;1	4	7	7	7	20.2	60.759	559	559;675;432;434	0	20.317				90	45;2713;3359;3421;4459;7417;8871	True;True;True;True;True;True;True	47;2894;3580;3647;4766;8048;9609	2080;176235;176236;176237;176238;176239;176240;176241;176242;176243;176244;176245;176246;176247;176248;176249;176250;176251;176252;176253;176254;176255;176256;176257;176258;176259;176260;176261;176262;176263;176264;176265;176266;176267;212404;212405;212406;212407;218149;218150;218151;218152;218153;296329;296330;296331;296332;296333;296334;296335;503478;503479;503480;503481;503482;503483;503484;50…	3068;324672;324673;324674;324675;324676;324677;324678;324679;324680;324681;324682;324683;324684;324685;324686;324687;324688;324689;324690;324691;324692;324693;324694;324695;324696;324697;324698;324699;324700;324701;324702;324703;324704;386114;386115;386116;386117;386118;398565;398566;398567;398568;398569;539510;539511;539512;539513;539514;539515;539516;914825;914826;914827;914828;914829;914830;91…	3068;324685;386116;398568;539511;914845;1111935			Q16555	DPYL2_HUMAN	Dihydropyrimidinase-related protein 2 OS=Homo sapiens (Human) GN=DPYSL2 PE=1 SV=1	0	0.991	0.998	not checked			45626	40480	39342	34167	37985		44856	30725
62	D2GZA5	D2GZA5;G1LZE2	D2GZA5;G1LZE2	Putative uncharacterized protein	tr|D2GZA5|D2GZA5_AILME Putative uncharacterized protein OS=Ailuropoda melanoleuca (Giant panda) GN=PANDA_002402 PE=3 SV=1;tr|G1LZE2|G1LZE2_AILME Uncharacterized protein OS=Ailuropoda melanoleuca (Giant panda) GN=HSP90AB1 PE=3 SV=1	---	19;19	13;13	6;6	2	19	13	6	27.1	83.267	724	724;741	0	85.246				91	491;1811;2099;2100;3471;3635;3709;3838;4649;5234;6594;7669;7770;7775;8362;8864;9842;9843;9920	True;False;True;True;False;True;True;True;True;True;True;True;False;True;True;True;False;False;False	529;1928;2238;2239;3699;3871;3953;4088;4971;5622;7174;8318;8426;8431;9059;9602;10648;10649;10729	34180;34181;34182;34183;34184;34185;34186;34187;34188;34189;34190;34191;34192;34193;34194;34195;34196;34197;34198;34199;34200;34201;34202;34203;34204;34205;34206;34207;34208;34209;34210;34211;34212;34213;34214;34215;34216;34217;34218;34219;34220;34221;34222;34223;34224;34225;34226;34227;34228;34229;34230;34231;117812;117813;117814;117815;117816;117817;117818;117819;117820;117821;117822;117823;117…	59294;59295;59296;59297;59298;59299;59300;59301;59302;59303;59304;59305;59306;59307;59308;59309;59310;59311;59312;59313;59314;59315;59316;59317;59318;59319;59320;59321;59322;59323;59324;59325;59326;59327;59328;59329;59330;59331;59332;59333;59334;59335;59336;59337;59338;59339;59340;59341;59342;59343;59344;59345;59346;59347;59348;59349;59350;59351;59352;59353;215395;215396;215397;215398;215399;2154…	59300;215396;254147;254175;402622;433582;442400;455599;566724;652206;840814;938524;946731;947046;1016306;1111383;1242524;1242532;1249278			P08238	HS90B_HUMAN	Heat shock protein HSP 90-beta OS=Homo sapiens (Human) GN=HSP90AB1 PE=1 SV=4	7.5e-201	0.986	0.999	not checked	62438	45639	130720	172850	216270	205900	105160	198680	174920	225470	59912
63	D2GZG2	D2GZG2	D2GZG2	Uncharacterized protein	tr|D2GZG2|D2GZG2_AILME Uncharacterized protein OS=Ailuropoda melanoleuca (Giant panda) GN=MYH9 PE=4 SV=1	MYH9	5	4	3	1	5	4	3	2.9	226.45	1961	1961	0.0079051	3.8704				92	452;1028;1843;7080;9408	True;False;True;True;True	488;1098;1963;7689;10178	32391;32392;32393;65795;65796;65797;65798;65799;65800;65801;65802;65803;65804;65805;65806;65807;65808;65809;65810;65811;65812;65813;65814;65815;65816;65817;65818;65819;65820;65821;65822;65823;65824;65825;65826;65827;65828;65829;65830;65831;65832;65833;65834;65835;65836;65837;65838;65839;65840;65841;65842;65843;65844;65845;65846;65847;65848;65849;65850;65851;65852;65853;65854;65855;65856;65857;658…	56552;56553;56554;112284;112285;112286;112287;112288;112289;112290;112291;112292;112293;112294;112295;112296;112297;112298;112299;112300;112301;112302;112303;112304;112305;112306;112307;112308;112309;112310;112311;112312;112313;112314;112315;112316;112317;112318;112319;112320;112321;112322;112323;112324;112325;112326;112327;112328;112329;112330;112331;112332;112333;112334;112335;112336;112337;112…	56552;112489;217085;883547;1188683			P35579	MYH9_HUMAN	Myosin-9 OS=Homo sapiens (Human) GN=MYH9 PE=1 SV=4	0	0.978	0.996	ok			16448	20195	15566				18554	16927
64	D2GZH1	D2GZH1	D2GZH1	Sulfurtransferase	tr|D2GZH1|D2GZH1_AILME Sulfurtransferase OS=Ailuropoda melanoleuca (Giant panda) GN=TST PE=4 SV=1	TST	11	11	11	1	11	11	11	48.8	33.69	297	297	0	64.907				93	1912;2714;3374;3729;4848;6297;8564;8582;9083;9227;9963	True;True;True;True;True;True;True;True;True;True;True	2039;2895;3596;3975;5201;6850;9277;9296;9833;9991;10774	123288;123289;123290;123291;123292;123293;123294;123295;123296;123297;123298;123299;123300;123301;123302;123303;123304;123305;123306;123307;123308;123309;123310;123311;123312;123313;123314;123315;123316;176268;176269;176270;176271;176272;176273;176274;176275;214225;214226;243054;243055;243056;243057;243058;243059;243060;243061;243062;243063;243064;243065;243066;243067;243068;243069;243070;243071;…	225271;225272;225273;225274;225275;225276;225277;225278;225279;225280;225281;225282;225283;225284;225285;225286;225287;225288;225289;225290;225291;225292;225293;225294;225295;225296;225297;225298;225299;324705;324706;324707;324708;324709;324710;324711;324712;389651;389652;444373;444374;444375;444376;444377;444378;444379;444380;444381;444382;444383;444384;444385;444386;444387;444388;444389;444390;…	225282;324710;389651;444390;590380;800658;1048717;1049717;1145570;1163522;1251641			Q16762	THTR_HUMAN	Thiosulfate sulfurtransferase OS=Homo sapiens (Human) GN=TST PE=1 SV=4	4.2e-138	0.923	0.983	ok			106880	215100	308770	136200	30132	202050	302360	230890	151930
65	D2GZH2	D2GZH2;G1LTE7	D2GZH2;G1LTE7	Sulfurtransferase	tr|D2GZH2|D2GZH2_AILME Sulfurtransferase OS=Ailuropoda melanoleuca (Giant panda) GN=PANDA_002479 PE=4 SV=1;tr|G1LTE7|G1LTE7_AILME Sulfurtransferase OS=Ailuropoda melanoleuca (Giant panda) GN=MPST PE=4 SV=1	---	4;4	4;4	4;4	2	4	4	4	22.1	25.429	231	231;302	0	26.442				94	319;542;898;8581	True;True;True;True	343;583;967;9295	23956;23957;23958;23959;23960;23961;23962;23963;23964;23965;23966;23967;23968;23969;23970;23971;23972;23973;23974;23975;23976;23977;23978;23979;23980;23981;23982;23983;23984;38315;38316;38317;38318;38319;38320;38321;38322;38323;38324;38325;38326;38327;38328;38329;38330;38331;38332;38333;38334;38335;38336;38337;38338;38339;38340;38341;38342;38343;38344;38345;38346;38347;60525;60526;60527;60528;605…	42968;42969;42970;42971;42972;42973;42974;42975;42976;42977;42978;42979;42980;42981;42982;42983;42984;42985;42986;42987;42988;42989;42990;42991;42992;42993;42994;42995;42996;42997;67008;67009;67010;67011;67012;67013;67014;67015;67016;67017;67018;67019;67020;67021;67022;67023;67024;67025;67026;67027;67028;67029;67030;67031;67032;67033;67034;67035;67036;67037;67038;67039;67040;67041;103964;103965;1…	42971;67017;103965;1049691			P25325	THTM_HUMAN	3-mercaptopyruvate sulfurtransferase OS=Homo sapiens (Human) GN=MPST PE=1 SV=3	9e-62	0.92	0.96	ok			55127	68568	124800	116940	78181	77398	137020	113010
66	D2GZL9	D2GZL9;G1LX74	D2GZL9;G1LX74	Adenylosuccinate lyase	tr|D2GZL9|D2GZL9_AILME Adenylosuccinate lyase OS=Ailuropoda melanoleuca (Giant panda) GN=PANDA_002542 PE=3 SV=1;tr|G1LX74|G1LX74_AILME Adenylosuccinate lyase OS=Ailuropoda melanoleuca (Giant panda) GN=ADSL PE=3 SV=1	---	10;10	10;10	10;10	2	10	10	10	27.4	54.098	474	474;490	0	70.115				95	145;243;3643;4327;4831;6305;6934;6941;7806;9167	True;True;True;True;True;True;True;True;True;True	155;256;3879;4621;5182;6860;7535;7542;8470;9924	8702;8703;8704;8705;8706;8707;8708;8709;8710;8711;8712;8713;8714;8715;8716;8717;8718;8719;8720;8721;8722;8723;8724;8725;8726;8727;8728;8729;8730;8731;8732;8733;8734;8735;8736;8737;8738;8739;8740;8741;8742;8743;8744;8745;8746;8747;8748;8749;8750;8751;8752;8753;8754;8755;8756;8757;8758;8759;8760;8761;8762;8763;8764;8765;8766;8767;8768;8769;13776;13777;13778;13779;13780;13781;13782;13783;13784;13785…	15463;15464;15465;15466;15467;15468;15469;15470;15471;15472;15473;15474;15475;15476;15477;15478;15479;15480;15481;15482;15483;15484;15485;15486;15487;15488;15489;15490;15491;15492;15493;15494;15495;15496;15497;15498;15499;15500;15501;15502;15503;15504;15505;15506;15507;15508;15509;15510;15511;15512;15513;15514;15515;15516;15517;15518;15519;15520;15521;15522;15523;15524;15525;15526;15527;15528;155…	15518;23941;434325;525596;588939;801661;865092;865226;950929;1159743			P30566	PUR8_HUMAN	Adenylosuccinate lyase OS=Homo sapiens (Human) GN=ADSL PE=1 SV=2	0	0.973	0.998	ok	167650	184950	345830	359340	179610	170830	329910	338410	130800	156190	320740
67	D2GZN4	D2GZN4;G1M0B9	D2GZN4;G1M0B9	Putative uncharacterized protein	tr|D2GZN4|D2GZN4_AILME Putative uncharacterized protein OS=Ailuropoda melanoleuca (Giant panda) GN=PANDA_002563 PE=4 SV=1;tr|G1M0B9|G1M0B9_AILME Uncharacterized protein OS=Ailuropoda melanoleuca (Giant panda) GN=TNNI1 PE=4 SV=1	---	8;8	7;7	7;7	2	8	7	7	31.4	20.182	175	175;188	0	170.75				96	1815;2273;3200;4269;4580;4761;6700;9364	True;True;True;True;False;True;True;True	1934;2429;3408;4559;4899;5108;5109;7289;7290;7291;10133;10134	118364;118365;118366;118367;118368;118369;118370;118371;118372;118373;118374;118375;118376;118377;118378;118379;118380;118381;149436;149437;149438;149439;149440;149441;149442;149443;149444;149445;149446;149447;149448;149449;149450;149451;149452;149453;149454;149455;149456;149457;149458;149459;149460;149461;149462;149463;149464;149465;149466;149467;149468;149469;149470;149471;149472;149473;149474;…	216131;216132;216133;216134;216135;216136;216137;216138;216139;216140;216141;216142;216143;216144;216145;216146;216147;216148;275185;275186;275187;275188;275189;275190;275191;275192;275193;275194;275195;275196;275197;275198;275199;275200;275201;275202;275203;275204;275205;275206;275207;275208;275209;275210;275211;275212;275213;275214;275215;275216;275217;275218;275219;275220;275221;275222;275223;…	216133;275248;367522;516713;560466;584330;849750;1184158	71;72;73	111;156;159	P19237	TNNI1_HUMAN	Troponin I, slow skeletal muscle OS=Homo sapiens (Human) GN=TNNI1 PE=1 SV=3	1.4e-70	0.949	0.983	ok	3267300	3814600	3460000	3107500	3052500	2946800	3496500	3431500	627270	604700	3121900
68	D2GZT1	D2GZT1;G1MFD4	D2GZT1;G1MFD4	Putative uncharacterized protein	tr|D2GZT1|D2GZT1_AILME Putative uncharacterized protein OS=Ailuropoda melanoleuca (Giant panda) GN=PANDA_002622 PE=4 SV=1;tr|G1MFD4|G1MFD4_AILME Uncharacterized protein OS=Ailuropoda melanoleuca (Giant panda) GN=C9 PE=4 SV=1	---	7;7	7;7	7;7	2	7	7	7	17.6	59.161	524	524;551	0	12.106				97	842;1255;2786;3250;5820;7369;8481	True;True;True;True;True;True;True	909;1337;2971;3464;6255;7995;9187	54648;78161;78162;78163;78164;78165;78166;78167;78168;78169;78170;78171;78172;78173;78174;78175;78176;78177;78178;78179;180082;180083;180084;180085;180086;180087;180088;180089;180090;180091;180092;180093;180094;180095;180096;180097;180098;180099;180100;180101;180102;180103;180104;180105;180106;180107;180108;180109;180110;180111;180112;180113;180114;180115;180116;180117;180118;180119;180120;205136…	92814;134635;134636;134637;134638;134639;134640;134641;134642;134643;134644;134645;134646;134647;134648;134649;134650;134651;134652;134653;330934;330935;330936;330937;330938;330939;330940;330941;330942;330943;330944;330945;330946;330947;330948;330949;330950;330951;330952;330953;330954;330955;330956;330957;330958;330959;330960;330961;330962;330963;330964;330965;330966;330967;330968;330969;330970;3…	92814;134635;330946;372098;733999;910232;1029132			P02748	CO9_HUMAN	Complement component C9 OS=Homo sapiens (Human) GN=C9 PE=1 SV=2	1.7e-173	0.736	0.914	not checked	62847	79075	81540	78677	32722	12888	34440	42712	41682	37226	79672
69	D2GZV8	D2GZV8;G1MIV1	D2GZV8;G1MIV1	Putative uncharacterized protein	tr|D2GZV8|D2GZV8_AILME Putative uncharacterized protein OS=Ailuropoda melanoleuca (Giant panda) GN=PANDA_002659 PE=4 SV=1;tr|G1MIV1|G1MIV1_AILME Uncharacterized protein OS=Ailuropoda melanoleuca (Giant panda) GN=COQ6 PE=4 SV=1	---	5;5	5;5	5;5	2	5	5	5	15.6	44.463	405	405;475	0	23.902				98	4157;4920;5475;8575;9120	True;True;True;True;True	4432;5280;5876;9289;9870	275556;275557;275558;275559;275560;275561;275562;275563;275564;275565;275566;275567;331246;331247;331248;374229;374230;374231;374232;374233;374234;374235;374236;374237;374238;374239;374240;374241;374242;374243;374244;374245;374246;374247;374248;374249;374250;374251;374252;374253;374254;374255;577661;577662;633294;633295	502807;502808;502809;502810;502811;502812;502813;502814;502815;502816;502817;502818;595398;595399;595400;686775;686776;686777;686778;686779;686780;686781;686782;686783;686784;686785;686786;686787;686788;686789;686790;686791;686792;686793;686794;686795;686796;686797;686798;686799;686800;686801;1049299;1049300;1151584;1151585	502811;595400;686801;1049299;1151584			Q9Y2Z9	COQ6_HUMAN	Ubiquinone biosynthesis monooxygenase COQ6, mitochondrial OS=Homo sapiens (Human) GN=COQ6 PE=1 SV=2	0	0.921	0.983	not checked	40708			332540	37150	46688			40491	32974
70	D2GZW1	D2GZW1;G1MIX0	D2GZW1;G1MIX0	Putative uncharacterized protein	tr|D2GZW1|D2GZW1_AILME Putative uncharacterized protein OS=Ailuropoda melanoleuca (Giant panda) GN=PANDA_002662 PE=3 SV=1;tr|G1MIX0|G1MIX0_AILME Uncharacterized protein OS=Ailuropoda melanoleuca (Giant panda) GN=ALDH6A1 PE=3 SV=1	---	11;11	11;11	11;11	2	11	11	11	31.5	54.073	498	498;534	0	46.005				99	252;385;1839;1894;5366;6994;8307;8713;9207;9722;10038	True;True;True;True;True;True;True;True;True;True;True	265;415;1958;2019;5764;7600;9001;9439;9969;10515;10855	13985;13986;13987;13988;13989;13990;13991;13992;13993;13994;13995;13996;13997;13998;13999;14000;14001;14002;14003;14004;14005;14006;14007;14008;28356;28357;28358;28359;28360;28361;28362;28363;28364;28365;28366;28367;28368;28369;28370;28371;28372;28373;28374;28375;28376;28377;28378;28379;28380;28381;118774;118775;118776;118777;118778;118779;122559;122560;122561;366830;366831;366832;366833;366834;3…	24192;24193;24194;24195;24196;24197;24198;24199;24200;24201;24202;24203;24204;24205;24206;24207;24208;24209;24210;24211;24212;24213;24214;24215;24216;24217;24218;24219;24220;24221;24222;24223;24224;24225;50347;50348;50349;50350;50351;50352;50353;50354;50355;50356;50357;50358;50359;50360;50361;50362;50363;50364;50365;50366;50367;50368;50369;50370;50371;50372;216772;216773;216774;216775;216776;2167…	24213;50360;216777;223947;674683;872270;1010676;1092405;1161988;1228187;1259336			Q02252	MMSA_HUMAN	Methylmalonate-semialdehyde dehydrogenase [acylating], mitochondrial OS=Homo sapiens (Human) GN=ALDH6A1 PE=1 SV=2	0	0.97	0.998	ok	75090	101220	224710	246750	235130	244670	212850	148580	144360	169040	135750
71	D2H007	D2H007;G1LL39	D2H007;G1LL39	Putative uncharacterized protein	tr|D2H007|D2H007_AILME Putative uncharacterized protein OS=Ailuropoda melanoleuca (Giant panda) GN=PANDA_002718 PE=4 SV=1;tr|G1LL39|G1LL39_AILME Uncharacterized protein OS=Ailuropoda melanoleuca (Giant panda) GN=GDA PE=4 SV=1	---	2;2	2;2	2;2	2	2	2	2	8.8	48.286	432	432;485	0	7.9888				100	2341;2824	True;True	2500;3013	152351;152352;152353;152354;152355;183044;183045;183046;183047;183048;183049;183050;183051;183052;183053	279450;279451;279452;279453;279454;335935;335936;335937;335938;335939;335940;335941;335942;335943;335944	279454;335944			Q9Y2T3	GUAD_HUMAN	Guanine deaminase OS=Homo sapiens (Human) GN=GDA PE=1 SV=1	7.2e-168	0.887	0.965	ok					18393		21896		18654	17415
72	D2H018	D2H018;G1LQK7	D2H018;G1LQK7	Putative uncharacterized protein	tr|D2H018|D2H018_AILME Putative uncharacterized protein OS=Ailuropoda melanoleuca (Giant panda) GN=PANDA_002732 PE=4 SV=1;tr|G1LQK7|G1LQK7_AILME Uncharacterized protein OS=Ailuropoda melanoleuca (Giant panda) GN=LOC100467802 PE=4 SV=1	---	3;3	3;3	3;3	2	3	3	3	28.7	18.18	157	157;215	0	13.423				101	4095;4655;7362	True;True;True	4363;4978;7988	270799;270800;270801;270802;270803;270804;270805;270806;270807;270808;270809;270810;270811;270812;270813;270814;270815;270816;270817;270818;270819;270820;270821;270822;270823;270824;270825;270826;270827;270828;270829;270830;270831;270832;270833;270834;312601;312602;312603;312604;312605;312606;312607;312608;312609;312610;312611;312612;312613;312614;312615;312616;312617;312618;312619;312620;312621;…	493335;493336;493337;493338;493339;493340;493341;493342;493343;493344;493345;493346;493347;493348;493349;493350;493351;493352;493353;493354;493355;493356;493357;493358;493359;493360;493361;493362;493363;493364;493365;493366;493367;493368;493369;493370;493371;493372;566839;566840;566841;566842;566843;566844;566845;566846;566847;566848;566849;566850;566851;566852;566853;566854;566855;566856;566857;…	493335;566840;909844			P09429	HMGB1_HUMAN	High mobility group protein B1 OS=Homo sapiens (Human) GN=HMGB1 PE=1 SV=3	1.7e-58	0.994	0.994	not checked	91119		58602	54788	72039	80482			93201	95677	114970
73	D2H073	D2H073;G1L2C1	D2H073;G1L2C1	Putative uncharacterized protein	tr|D2H073|D2H073_AILME Putative uncharacterized protein OS=Ailuropoda melanoleuca (Giant panda) GN=PANDA_002799 PE=3 SV=1;tr|G1L2C1|G1L2C1_AILME Uncharacterized protein OS=Ailuropoda melanoleuca (Giant panda) GN=EIF4A2 PE=3 SV=1	---	12;12	12;12	5;5	2	12	12	5	32.1	45.606	399	399;408	0	31.584				102	2051;2332;2971;3118;3431;3499;4635;5662;6149;6982;8850;9135	True;True;True;True;True;True;True;True;True;True;True;True	2187;2491;3168;3322;3657;3728;4956;6088;6633;7588;9588;9887	134216;134217;134218;134219;134220;134221;134222;134223;134224;134225;134226;134227;134228;134229;134230;134231;134232;134233;134234;151885;151886;190629;190630;190631;198288;198289;198290;198291;198292;198293;198294;198295;198296;198297;198298;198299;198300;198301;198302;198303;198304;198305;198306;198307;198308;198309;198310;198311;198312;198313;198314;198315;218511;223426;223427;223428;223429;…	247126;247127;247128;247129;247130;247131;247132;247133;247134;247135;247136;247137;247138;247139;247140;247141;247142;247143;247144;278882;278883;348214;348215;348216;360897;360898;360899;360900;360901;360902;360903;360904;360905;360906;360907;360908;360909;360910;360911;360912;360913;360914;360915;360916;360917;360918;360919;360920;360921;360922;360923;360924;360925;360926;360927;399034;407488;…	247143;278883;348214;360908;399034;407495;564186;708797;782083;871735;1110245;1153593			Q14240	IF4A2_HUMAN	Eukaryotic initiation factor 4A-II OS=Homo sapiens (Human) GN=EIF4A2 PE=1 SV=2	1.2e-217	0.997	1	not checked	154120	138370	333420	284950	206330	222370	101290	100660	251630	258300	145690
74	D2H0B3	D2H0B3;G1LB35	D2H0B3;G1LB35	Putative uncharacterized protein	tr|D2H0B3|D2H0B3_AILME Putative uncharacterized protein OS=Ailuropoda melanoleuca (Giant panda) GN=PANDA_002848 PE=4 SV=1;tr|G1LB35|G1LB35_AILME Uncharacterized protein OS=Ailuropoda melanoleuca (Giant panda) GN=IPO5 PE=4 SV=1	---	10;9	10;9	10;9	2	10	10	10	13.3	120.45	1067	1067;1099	0	21.048				103	369;755;2354;4383;5519;5689;5992;7743;7772;9382	True;True;True;True;True;True;True;True;True;True	396;813;2513;4683;5922;6116;6442;8398;8428;10152	27150;27151;27152;27153;27154;27155;49657;49658;49659;49660;49661;152926;291050;291051;291052;291053;291054;291055;291056;291057;291058;376945;376946;376947;389944;389945;389946;389947;389948;389949;389950;389951;389952;389953;389954;415383;415384;415385;415386;415387;415388;415389;415390;415391;415392;415393;415394;415395;415396;415397;415398;415399;415400;415401;415402;415403;415404;415405;4154…	47972;47973;47974;47975;47976;47977;85197;85198;85199;85200;85201;280311;530506;530507;530508;530509;530510;530511;530512;530513;530514;691268;691269;691270;713978;713979;713980;713981;713982;713983;713984;713985;713986;713987;713988;713989;760693;760694;760695;760696;760697;760698;760699;760700;760701;760702;760703;760704;760705;760706;760707;760708;760709;760710;760711;760712;760713;760714;7607…	47976;85198;280311;530513;691268;713982;760710;943979;946967;1185826			O00410	IPO5_HUMAN	Importin-5 OS=Homo sapiens (Human) GN=IPO5 PE=1 SV=4	0	0.993	0.998	ok	73190	121790	141440	388920	113260	124560	148290	1751200	124240	214760	128410
75	D2H0C1	D2H0C1	D2H0C1	Uncharacterized protein	tr|D2H0C1|D2H0C1_AILME Uncharacterized protein OS=Ailuropoda melanoleuca (Giant panda) GN=CLYBL PE=4 SV=1	CLYBL	6	6	6	1	6	6	6	25.4	35.555	319	319	0	24.264				104	2334;4709;7227;8316;8809;9662	True;True;True;True;True;True	2493;5045;7844;9010;9545;10452	151934;151935;151936;151937;151938;151939;151940;151941;151942;151943;151944;317965;317966;317967;317968;317969;491492;491493;491494;491495;491496;491497;491498;491499;491500;491501;491502;491503;491504;559068;608291;608292;608293;608294;608295;608296;672227;672228;672229;672230;672231;672232;672233;672234;672235;672236;672237;672238;672239;672240;672241;672242;672243	278942;278943;278944;278945;278946;278947;278948;278949;278950;278951;278952;278953;575424;575425;575426;575427;575428;895987;895988;895989;895990;895991;895992;895993;895994;895995;895996;895997;895998;895999;1011899;1105241;1105242;1105243;1105244;1105245;1105246;1217979;1217980;1217981;1217982;1217983;1217984;1217985;1217986;1217987;1217988;1217989;1217990;1217991;1217992;1217993;1217994;12179…	278952;575424;895994;1011899;1105246;1217985			Q8N0X4	CLYBL_HUMAN	Citrate lyase subunit beta-like protein, mitochondrial OS=Homo sapiens (Human) GN=CLYBL PE=1 SV=2	9.5e-180	0.931	0.972	ok			42048	41863	47072	44428	53031	37342	54047	71282
76	D2H0C3	D2H0C3;G1MAN4	D2H0C3;G1MAN4	Putative uncharacterized protein	tr|D2H0C3|D2H0C3_AILME Putative uncharacterized protein OS=Ailuropoda melanoleuca (Giant panda) GN=PANDA_002861 PE=3 SV=1;tr|G1MAN4|G1MAN4_AILME Uncharacterized protein OS=Ailuropoda melanoleuca (Giant panda) GN=CCT7 PE=3 SV=1	---	7;7	7;7	7;7	2	7	7	7	15.3	59.431	543	543;555	0	8.4432				105	451;788;1968;5441;7229;7849;9262	True;True;True;True;True;True;True	487;851;2099;5842;7846;8517;10026	32389;32390;51745;51746;51747;51748;51749;51750;51751;51752;51753;51754;51755;51756;51757;51758;51759;51760;51761;51762;51763;51764;51765;51766;51767;51768;51769;51770;51771;51772;51773;51774;51775;51776;125984;125985;371425;371426;371427;371428;371429;371430;371431;371432;371433;371434;371435;371436;371437;371438;371439;371440;371441;371442;371443;371444;371445;371446;371447;491528;491529;491530…	56550;56551;88588;88589;88590;88591;88592;88593;88594;88595;88596;88597;88598;88599;88600;88601;88602;88603;88604;88605;88606;88607;88608;88609;88610;88611;88612;88613;88614;88615;88616;88617;88618;88619;229804;229805;681327;681328;681329;681330;681331;681332;681333;681334;681335;681336;681337;681338;681339;681340;681341;681342;681343;681344;681345;681346;681347;681348;681349;896023;896024;896025…	56551;88589;229805;681348;896024;954900;1171665			Q99832	TCPH_HUMAN	T-complex protein 1 subunit eta OS=Homo sapiens (Human) GN=CCT7 PE=1 SV=2	0	0.974	0.993	not checked			54924	62525	45664		57732	54736	47457	53906
77	D2H0C8	D2H0C8;G1MAW6	D2H0C8;G1MAW6	Putative uncharacterized protein	tr|D2H0C8|D2H0C8_AILME Putative uncharacterized protein OS=Ailuropoda melanoleuca (Giant panda) GN=PANDA_002868 PE=4 SV=1;tr|G1MAW6|G1MAW6_AILME Uncharacterized protein OS=Ailuropoda melanoleuca (Giant panda) GN=SPR PE=4 SV=1	---	5;5	5;5	5;5	2	5	5	5	27.4	25.54	234	234;238	0	16.753				106	5516;5517;7584;9140;9250	True;True;True;True;True	5919;5920;8229;9893;10014	376880;376881;376882;376883;376884;376885;376886;376887;376888;376889;376890;376891;376892;376893;376894;376895;376896;376897;376898;376899;376900;376901;376902;376903;376904;376905;376906;376907;376908;376909;376910;376911;376912;376913;376914;376915;376916;376917;376918;376919;376920;376921;376922;376923;376924;376925;376926;376927;376928;376929;376930;376931;376932;376933;376934;376935;376936;…	691203;691204;691205;691206;691207;691208;691209;691210;691211;691212;691213;691214;691215;691216;691217;691218;691219;691220;691221;691222;691223;691224;691225;691226;691227;691228;691229;691230;691231;691232;691233;691234;691235;691236;691237;691238;691239;691240;691241;691242;691243;691244;691245;691246;691247;691248;691249;691250;691251;691252;691253;691254;691255;691256;691257;691258;691259;…	691213;691234;930657;1153705;1170273			P35270	SPRE_HUMAN	Sepiapterin reductase OS=Homo sapiens (Human) GN=SPR PE=1 SV=1	1.5e-89	0.868	0.962	ok		42619	58972	60575	83768	77191		46668	72495	64212	47288
78	D2H0E3	D2H0E3;G1MC33	D2H0E3;G1MC33	Putative uncharacterized protein	tr|D2H0E3|D2H0E3_AILME Putative uncharacterized protein OS=Ailuropoda melanoleuca (Giant panda) GN=PANDA_002887 PE=4 SV=1;tr|G1MC33|G1MC33_AILME Uncharacterized protein OS=Ailuropoda melanoleuca (Giant panda) GN=PCYOX1 PE=4 SV=1	---	3;3	3;3	3;3	2	3	3	3	7	52.981	469	469;508	0.0053836	4.1862				107	5182;7473;8343	True;True;True	5566;8111;9039	353094;353095;353096;353097;353098;506834;506835;506836;506837;506838;506839;560688	646171;646172;646173;646174;646175;919710;919711;919712;919713;919714;919715;1015085	646175;919713;1015085			Q9UHG3	PCYOX_HUMAN	Prenylcysteine oxidase 1 OS=Homo sapiens (Human) GN=PCYOX1 PE=1 SV=3	1.8e-187	0.893	0.97	ok								47892
79	G1MCC0	G1MCC0;D2H0E6	G1MCC0;D2H0E6;D2HB30;G1L4L2;G1L4L8	Uncharacterized protein	tr|G1MCC0|G1MCC0_AILME Uncharacterized protein OS=Ailuropoda melanoleuca (Giant panda) GN=PCBP1 PE=4 SV=1;tr|D2H0E6|D2H0E6_AILME Putative uncharacterized protein OS=Ailuropoda melanoleuca (Giant panda) GN=PANDA_002891 PE=4 SV=1	PCBP1	6;6;1;1;1	6;6;1;1;1	5;5;0;0;0	5	6	6	5	23.4	36.466	346	346;356;323;352;367	0	26.702				108	391;3786;4075;4221;6985;7240	True;True;True;True;True;True	425;4033;4342;4506;7591;7858	29386;29387;29388;29389;29390;29391;29392;29393;29394;29395;29396;29397;29398;29399;29400;29401;29402;29403;29404;29405;29406;29407;29408;29409;29410;29411;29412;29413;29414;29415;29416;29417;29418;29419;29420;246838;246839;246840;246841;246842;246843;246844;246845;269860;269861;269862;269863;269864;269865;269866;269867;269868;269869;269870;269871;269872;269873;269874;269875;269876;269877;269878;…	51834;51835;51836;51837;51838;51839;51840;51841;51842;51843;51844;51845;51846;51847;51848;51849;51850;51851;51852;51853;51854;51855;51856;51857;51858;51859;51860;51861;51862;51863;51864;51865;51866;51867;51868;451010;451011;451012;451013;451014;451015;451016;451017;491871;491872;491873;491874;491875;491876;491877;491878;491879;491880;491881;491882;491883;491884;491885;491886;491887;491888;491889;…	51842;451014;491875;510654;871808;896259			Q15365	PCBP1_HUMAN	Poly(rC)-binding protein 1 OS=Homo sapiens (Human) GN=PCBP1 PE=1 SV=2	6e-105	0.972	0.972	ok	90439	98249	103860	99459	113150	106550	112900	95530	99723	130290	83453
80	D2H0F1	D2H0F1;G1MCK4	D2H0F1;G1MCK4	Annexin	tr|D2H0F1|D2H0F1_AILME Annexin OS=Ailuropoda melanoleuca (Giant panda) GN=PANDA_002897 PE=3 SV=1;tr|G1MCK4|G1MCK4_AILME Annexin OS=Ailuropoda melanoleuca (Giant panda) GN=ANXA4 PE=3 SV=1	---	4;4	4;4	4;4	2	4	4	4	14	34.147	301	301;323	0.0067114	4.169				109	2656;2847;4861;9181	True;True;True;True	2834;3038;5214;9938	173873;173874;173875;173876;184606;329437;638026;638027;638028;638029	320736;320737;320738;320739;339084;593070;1160532;1160533;1160534;1160535	320737;339084;593070;1160533			P09525	ANXA4_HUMAN	Annexin A4 OS=Homo sapiens (Human) GN=ANXA4 PE=1 SV=4	5e-159	0.94	0.987	ok						30552
81	D2H0H5	D2H0H5;G1LE04	D2H0H5;G1LE04	Putative uncharacterized protein	tr|D2H0H5|D2H0H5_AILME Putative uncharacterized protein OS=Ailuropoda melanoleuca (Giant panda) GN=PANDA_002926 PE=4 SV=1;tr|G1LE04|G1LE04_AILME Uncharacterized protein OS=Ailuropoda melanoleuca (Giant panda) GN=TMOD1 PE=4 SV=1	---	2;2	1;1	1;1	2	2	1	1	6.2	38.1	338	338;359	0.0091146	3.6615				111	2574;5091	False;True	2749;5470	168912;168913;168914;168915;168916;168917;168918;168919;168920;168921;168922;348281;348282;348283;348284;348285;348286;348287	312112;312113;312114;312115;312116;312117;312118;312119;312120;312121;312122;637730;637731;637732;637733;637734;637735;637736	312117;637733			P28289	TMOD1_HUMAN	Tropomodulin-1 OS=Homo sapiens (Human) GN=TMOD1 PE=1 SV=1	1.2e-149	0.976	0.997	ok				22580
82	D2H0J7	D2H0J7	D2H0J7	Uncharacterized protein	tr|D2H0J7|D2H0J7_AILME Uncharacterized protein OS=Ailuropoda melanoleuca (Giant panda) GN=TPT1 PE=4 SV=1	TPT1	4	4	4	1	4	4	4	26.3	20.464	179	179	0	35.959				112	1393;1961;3617;9060	True;True;True;True	1480;2092;3850;9810	90031;90032;90033;90034;90035;90036;90037;90038;90039;90040;90041;90042;90043;90044;90045;90046;90047;90048;90049;90050;90051;90052;90053;90054;90055;90056;90057;90058;90059;90060;90061;90062;90063;90064;90065;90066;90067;90068;125824;125825;125826;125827;125828;125829;125830;125831;235747;627736;627737;627738;627739;627740;627741;627742;627743;627744;627745;627746;627747;627748;627749;627750;627…	158755;158756;158757;158758;158759;158760;158761;158762;158763;158764;158765;158766;158767;158768;158769;158770;158771;158772;158773;158774;158775;158776;158777;158778;158779;158780;158781;158782;158783;158784;158785;158786;158787;158788;158789;158790;158791;158792;158793;158794;158795;158796;158797;158798;229560;229561;229562;229563;229564;229565;229566;229567;431102;1143025;1143026;1143027;1143…	158783;229563;431102;1143034			P13693	TCTP_HUMAN	Translationally-controlled tumor protein OS=Homo sapiens (Human) GN=TPT1 PE=1 SV=1	4.6e-85	1	1	ok	69024	79405	104420	108500				174500			121810
83	D2H129	D2H129;G1M9F0	D2H129;G1M9F0	Putative uncharacterized protein	tr|D2H129|D2H129_AILME Putative uncharacterized protein OS=Ailuropoda melanoleuca (Giant panda) GN=PANDA_003186 PE=3 SV=1;tr|G1M9F0|G1M9F0_AILME Adenylate kinase isoenzyme 1 OS=Ailuropoda melanoleuca (Giant panda) GN=AK1 PE=3 SV=1	---	16;16	16;16	16;16	2	16	16	16	67.5	22.769	206	206;210	0	323.31				113	770;771;2393;2394;2972;3298;3998;4047;4845;6199;7314;7330;8725;8726;9205;9914	True;True;True;True;True;True;True;True;True;True;True;True;True;True;True;True	829;830;2556;2557;3169;3516;3517;4261;4262;4312;5198;6704;6705;6706;7936;7937;7953;9453;9454;9967;10723	50757;50758;50759;50760;50761;50762;50763;50764;50765;50766;50767;50768;50769;50770;50771;50772;50773;50774;50775;50776;50777;50778;50779;50780;50781;50782;50783;50784;50785;50786;50787;50788;50789;50790;50791;50792;50793;50794;50795;50796;50797;50798;50799;50800;50801;50802;50803;50804;50805;50806;50807;50808;50809;50810;50811;50812;50813;50814;50815;50816;50817;50818;50819;50820;50821;50822;508…	87221;87222;87223;87224;87225;87226;87227;87228;87229;87230;87231;87232;87233;87234;87235;87236;87237;87238;87239;87240;87241;87242;87243;87244;87245;87246;87247;87248;87249;87250;87251;87252;87253;87254;87255;87256;87257;87258;87259;87260;87261;87262;87263;87264;87265;87266;87267;87268;87269;87270;87271;87272;87273;87274;87275;87276;87277;87278;87279;87280;87281;87282;87283;87284;87285;87286;872…	87374;87383;285046;285071;348415;376924;477465;488209;590284;787804;905699;907054;1094919;1094985;1161881;1249082	74;75	87;137	P00568	KAD1_HUMAN	Adenylate kinase isoenzyme 1 OS=Homo sapiens (Human) GN=AK1 PE=1 SV=3	6.6e-86	0.979	0.995	ok	4011000	4119000	4157900	4844500	1878300	1978400	6044400	5897500	455420	476920	3619200
84	D2H134	D2H134;G1M9P2;G1M9P6	D2H134;G1M9P2;G1M9P6	Putative uncharacterized protein	tr|D2H134|D2H134_AILME Putative uncharacterized protein OS=Ailuropoda melanoleuca (Giant panda) GN=PANDA_003194 PE=4 SV=1;tr|G1M9P2|G1M9P2_AILME Uncharacterized protein OS=Ailuropoda melanoleuca (Giant panda) GN=PTGES2 PE=3 SV=1;tr|G1M9P6|G1M9P6_AILME Un	---	8;8;8	8;8;8	8;8;8	3	8	8	8	35.6	34.873	303	303;354;361	0	80.159				114	247;248;2538;3602;4304;4851;7243;7420	True;True;True;True;True;True;True;True	260;261;2710;3835;4596;5204;7861;8051	13903;13904;13905;13906;13907;13908;13909;13910;13911;13912;13913;13914;13915;13916;13917;13918;13919;13920;13921;13922;13923;13924;13925;13926;13927;13928;13929;13930;13931;13932;13933;13934;13935;13936;13937;13938;13939;167046;167047;167048;167049;167050;167051;167052;167053;167054;167055;167056;167057;167058;167059;167060;167061;167062;167063;167064;235091;286676;286677;328069;328070;328071;32…	24104;24105;24106;24107;24108;24109;24110;24111;24112;24113;24114;24115;24116;24117;24118;24119;24120;24121;24122;24123;24124;24125;24126;24127;24128;24129;24130;24131;24132;24133;24134;24135;24136;24137;24138;24139;24140;24141;24142;24143;309404;309405;309406;309407;309408;309409;309410;309411;309412;309413;309414;309415;309416;309417;309418;309419;309420;309421;309422;430136;524209;524210;59042…	24138;24143;309418;430136;524209;590448;896782;915159			Q9H7Z7	PGES2_HUMAN	Prostaglandin E synthase 2 OS=Homo sapiens (Human) GN=PTGES2 PE=1 SV=1	1.3e-170	0.917	0.99	ok	67094	50938	77180	73527	258520	157520	98004	90753	244160	162110
85	D2H159	D2H159;G1MBW9	D2H159;G1MBW9	Putative uncharacterized protein	tr|D2H159|D2H159_AILME Putative uncharacterized protein OS=Ailuropoda melanoleuca (Giant panda) GN=PANDA_003230 PE=3 SV=1;tr|G1MBW9|G1MBW9_AILME Uncharacterized protein OS=Ailuropoda melanoleuca (Giant panda) GN=CRAT PE=3 SV=1	---	18;18	18;18	18;18	2	18	18	18	26.4	69.807	617	617;626	0	131.68				115	495;921;941;2227;2586;2680;4487;4488;4809;5657;6886;6928;7093;7828;8086;8139;9381;9974	True;True;True;True;True;True;True;True;True;True;True;True;True;True;True;True;True;True	533;990;1010;2379;2761;2861;4794;4795;5160;6083;7485;7528;7702;8496;8768;8823;10151;10785	34344;34345;61844;61845;61846;61847;61848;61849;61850;61851;61852;61853;61854;61855;61856;61857;61858;61859;61860;61861;61862;61863;61864;61865;61866;61867;61868;61869;61870;61871;61872;61873;61874;61875;61876;61877;61878;61879;62459;62460;62461;62462;62463;62464;62465;62466;62467;62468;62469;62470;62471;62472;62473;62474;62475;62476;62477;62478;62479;62480;62481;62482;62483;62484;62485;145468;14…	59474;59475;105725;105726;105727;105728;105729;105730;105731;105732;105733;105734;105735;105736;105737;105738;105739;105740;105741;105742;105743;105744;105745;105746;105747;105748;105749;105750;105751;105752;105753;105754;105755;105756;105757;105758;105759;105760;105761;105762;105763;105764;105765;105766;105767;105768;105769;105770;105771;105772;105773;105774;105775;105776;105777;105778;105779;10…	59474;105731;106495;266511;313087;322537;549197;549275;587257;707276;859196;864165;884349;954020;988091;993449;1185822;1252129			P43155	CACP_HUMAN	Carnitine O-acetyltransferase OS=Homo sapiens (Human) GN=CRAT PE=1 SV=5	0	0.922	0.982	ok	822470	867380	973370	1040900	1008800	982110	1137000	1166500	1206500	1184200	915570
86	D2H1B9	D2H1B9;G1LH49	D2H1B9;G1LH49	Putative uncharacterized protein	tr|D2H1B9|D2H1B9_AILME Putative uncharacterized protein OS=Ailuropoda melanoleuca (Giant panda) GN=PANDA_003307 PE=4 SV=1;tr|G1LH49|G1LH49_AILME Uncharacterized protein OS=Ailuropoda melanoleuca (Giant panda) GN=PDLIM5 PE=4 SV=1	---	11;6	11;6	11;6	2	11	11	11	21.3	64.18	596	596;514	0	241.69				116	709;1220;2887;3971;4094;4114;4115;4116;5323;6678;7814	True;True;True;True;True;True;True;True;True;True;True	763;1299;1300;3078;3079;4232;4233;4362;4383;4384;4385;5719;7262;8480	47539;47540;47541;47542;47543;47544;47545;47546;47547;47548;47549;47550;47551;47552;47553;47554;47555;47556;47557;47558;47559;47560;47561;47562;47563;47564;47565;47566;47567;47568;47569;47570;47571;47572;47573;47574;47575;47576;47577;47578;47579;47580;47581;47582;47583;47584;47585;47586;47587;47588;47589;47590;47591;47592;47593;47594;47595;47596;47597;47598;47599;47600;47601;47602;47603;47604;476…	82178;82179;82180;82181;82182;82183;82184;82185;82186;82187;82188;82189;82190;82191;82192;82193;82194;82195;82196;82197;82198;82199;82200;82201;82202;82203;82204;82205;82206;82207;82208;82209;82210;82211;82212;82213;82214;82215;82216;82217;82218;82219;82220;82221;82222;82223;82224;82225;82226;82227;82228;82229;82230;82231;82232;82233;82234;82235;82236;82237;82238;82239;82240;82241;82242;82243;822…	82329;131752;342260;471348;493322;497020;497086;497095;667885;847990;951852	76;77;78	26;61;79	Q96HC4	PDLI5_HUMAN	PDZ and LIM domain protein 5 OS=Homo sapiens (Human) GN=PDLIM5 PE=1 SV=5	3.1e-125	0.916	0.963	ok	3619100	3744400	4205700	4361900	5023600	4569200	3938900	3739600	4414500	3919800	4342000
87	D2H1D0	D2H1D0;G1MF49	D2H1D0;G1MF49	Putative uncharacterized protein	tr|D2H1D0|D2H1D0_AILME Putative uncharacterized protein OS=Ailuropoda melanoleuca (Giant panda) GN=PANDA_003323 PE=3 SV=1;tr|G1MF49|G1MF49_AILME Uncharacterized protein OS=Ailuropoda melanoleuca (Giant panda) GN=SERPINH1 PE=3 SV=1	---	5;5	5;5	5;5	2	5	5	5	18.2	45.187	407	407;420	0	19.041				117	1504;1609;3472;5199;6759	True;True;True;True;True	1605;1715;3700;5584;7354	100694;100695;100696;100697;100698;100699;100700;100701;100702;100703;100704;100705;100706;107291;107292;107293;107294;107295;220773;220774;353930;353931;353932;353933;353934;353935;353936;466288	184017;184018;184019;184020;184021;184022;184023;184024;184025;184026;184027;184028;184029;196571;196572;196573;196574;196575;402795;402796;647687;647688;647689;647690;647691;647692;647693;854128	184024;196574;402796;647687;854128			P50454	SERPH_HUMAN	Serpin H1 OS=Homo sapiens (Human) GN=SERPINH1 PE=1 SV=2	4.9e-196	0.968	0.993	ok			82037	63390	24087	21810	17706	14234	35751	34829
88	D2H1D2	D2H1D2;F2X1Z9;G1MF88	D2H1D2;F2X1Z9;G1MF88	Putative uncharacterized protein	tr|D2H1D2|D2H1D2_AILME Putative uncharacterized protein OS=Ailuropoda melanoleuca (Giant panda) GN=PANDA_003327 PE=3 SV=1;tr|F2X1Z9|F2X1Z9_AILME Ribosomal protein S3 OS=Ailuropoda melanoleuca (Giant panda) GN=RPS3 PE=2 SV=1;tr|G1MF88|G1MF88_AILME Unchara	---	12;12;12	12;12;12	12;12;12	3	12	12	12	57.9	25.504	233	233;243;248	0	30.586				118	200;1193;2042;2144;2547;2798;2800;2875;3145;4202;5463;8130	True;True;True;True;True;True;True;True;True;True;True;True	213;1270;2177;2286;2720;2984;2986;3066;3351;4484;5864;8814	11757;11758;11759;11760;75181;75182;75183;75184;75185;75186;75187;75188;75189;75190;75191;75192;75193;75194;75195;75196;75197;75198;75199;75200;75201;75202;75203;75204;75205;75206;75207;75208;75209;75210;75211;75212;75213;75214;75215;75216;75217;75218;75219;75220;75221;75222;75223;133934;133935;133936;139961;167282;167283;181592;181593;181594;181595;181596;181597;181598;181599;181600;181601;18160…	20736;20737;20738;20739;129127;129128;129129;129130;129131;129132;129133;129134;129135;129136;129137;129138;129139;129140;129141;129142;129143;129144;129145;129146;129147;129148;129149;129150;129151;129152;129153;129154;129155;129156;129157;129158;129159;129160;129161;129162;129163;129164;129165;129166;129167;129168;129169;246722;246723;246724;257670;309729;309730;333345;333346;333347;333348;3333…	20738;129127;246724;257670;309730;333370;333472;340988;363202;508563;684066;993081			P23396	RS3_HUMAN	40S ribosomal protein S3 OS=Homo sapiens (Human) GN=RPS3 PE=1 SV=2	1.2e-80	0.996	1	ok	81577	115500	130280	123610	175920	202470	76912	60867	184390	235380	65794
89	D2H1K5	D2H1K5;G1LTZ6	D2H1K5;G1LTZ6	Putative uncharacterized protein	tr|D2H1K5|D2H1K5_AILME Putative uncharacterized protein OS=Ailuropoda melanoleuca (Giant panda) GN=PANDA_003418 PE=3 SV=1;tr|G1LTZ6|G1LTZ6_AILME Uncharacterized protein OS=Ailuropoda melanoleuca (Giant panda) GN=GLUD1 PE=3 SV=1	---	5;5	5;5	5;5	2	5	5	5	13.2	55.494	500	500;527	0	13.082				120	3585;4031;8046;9996;10052	True;True;True;True;True	3816;4295;8725;10809;10870	233625;233626;233627;233628;233629;233630;233631;233632;263650;263651;263652;542321;542322;542323;542324;542325;542326;542327;542328;542329;542330;691187;691188;691189;691190;691191;691192;694622;694623;694624;694625;694626;694627;694628;694629;694630;694631;694632;694633;694634;694635;694636;694637;694638;694639	427595;427596;427597;427598;427599;427600;427601;427602;480733;480734;480735;983420;983421;983422;983423;983424;983425;983426;983427;983428;983429;1254943;1254944;1254945;1254946;1254947;1254948;1260539;1260540;1260541;1260542;1260543;1260544;1260545;1260546;1260547;1260548;1260549;1260550;1260551;1260552;1260553;1260554;1260555;1260556	427598;480733;983427;1254947;1260543			P00367	DHE3_HUMAN	Glutamate dehydrogenase 1, mitochondrial OS=Homo sapiens (Human) GN=GLUD1 PE=1 SV=2	0	0.994	1	ok			40943	46795	37124	37723	38727	47330	37584	37284
90	D2H1L9	D2H1L9;G1LTZ8	D2H1L9;G1LTZ8	Putative uncharacterized protein	tr|D2H1L9|D2H1L9_AILME Putative uncharacterized protein OS=Ailuropoda melanoleuca (Giant panda) GN=PANDA_003435 PE=4 SV=1;tr|G1LTZ8|G1LTZ8_AILME Uncharacterized protein OS=Ailuropoda melanoleuca (Giant panda) GN=LOC100478555 PE=4 SV=1	---	11;11	11;11	11;11	2	11	11	11	67.8	26.795	245	245;257	0	179.74				122	253;574;1422;1671;3154;3382;3653;4756;6424;7976;9983	True;True;True;True;True;True;True;True;True;True;True	266;620;1510;1781;3360;3604;3889;5101;6985;6986;8650;10794	14009;14010;14011;14012;14013;14014;14015;14016;14017;14018;14019;14020;14021;14022;14023;14024;14025;14026;14027;14028;14029;14030;14031;14032;14033;14034;14035;14036;14037;14038;14039;14040;14041;14042;14043;14044;14045;14046;14047;14048;14049;14050;14051;14052;14053;14054;14055;14056;14057;14058;14059;14060;14061;14062;14063;14064;14065;14066;14067;14068;14069;14070;14071;14072;14073;14074;140…	24226;24227;24228;24229;24230;24231;24232;24233;24234;24235;24236;24237;24238;24239;24240;24241;24242;24243;24244;24245;24246;24247;24248;24249;24250;24251;24252;24253;24254;24255;24256;24257;24258;24259;24260;24261;24262;24263;24264;24265;24266;24267;24268;24269;24270;24271;24272;24273;24274;24275;24276;24277;24278;24279;24280;24281;24282;24283;24284;24285;24286;24287;24288;24289;24290;24291;242…	24228;68311;164356;203628;364073;390170;436038;584133;814395;964729;1252319	79	145	P30048	PRDX3_HUMAN	Thioredoxin-dependent peroxide reductase, mitochondrial OS=Homo sapiens (Human) GN=PRDX3 PE=1 SV=3	4.1e-117	0.931	0.967	ok	1825600	2116100	1337500	1362600	1719900	1853100	1687700	1987500	702340	788870	2074700
91	D2H1M3	D2H1M3	D2H1M3	Uncharacterized protein	tr|D2H1M3|D2H1M3_AILME Uncharacterized protein OS=Ailuropoda melanoleuca (Giant panda) GN=BAG3 PE=4 SV=1	BAG3	7	7	7	1	7	7	7	17.7	55.083	519	519	0	27.984				123	2103;6804;7434;7898;8116;8788;8789	True;True;True;True;True;True;True	2242;7401;8070;8568;8799;9522;9523	138047;138048;138049;138050;138051;138052;138053;138054;138055;138056;138057;138058;138059;138060;467213;467214;467215;467216;467217;467218;467219;467220;467221;467222;467223;467224;467225;467226;467227;467228;467229;467230;467231;467232;467233;467234;467235;467236;467237;467238;467239;467240;504542;530365;530366;530367;530368;547061;547062;607299;607300;607301;607302;607303;607304;607305;607306;…	254233;254234;254235;254236;254237;254238;254239;254240;254241;254242;254243;254244;254245;254246;254247;855532;855533;855534;855535;855536;855537;855538;855539;855540;855541;855542;855543;855544;855545;855546;855547;855548;855549;855550;855551;855552;855553;855554;855555;855556;855557;855558;855559;916219;959159;959160;959161;959162;991358;991359;1103736;1103737;1103738;1103739;1103740;1103741;1…	254236;855555;916219;959161;991358;1103736;1103763			O95817	BAG3_HUMAN	BAG family molecular chaperone regulator 3 OS=Homo sapiens (Human) GN=BAG3 PE=1 SV=3	6e-65	0.844	0.929	ok			53100		84692	57792	46959	33312		22305
92	D2H1Q0	D2H1Q0;G1M9Q4	D2H1Q0;G1M9Q4	Putative uncharacterized protein	tr|D2H1Q0|D2H1Q0_AILME Putative uncharacterized protein OS=Ailuropoda melanoleuca (Giant panda) GN=PANDA_003474 PE=4 SV=1;tr|G1M9Q4|G1M9Q4_AILME Uncharacterized protein OS=Ailuropoda melanoleuca (Giant panda) GN=PSMD6 PE=4 SV=1	---	2;2	2;2	2;2	2	2	2	2	6.7	45.222	387	387;390	0.0014837	6.1179				125	2839;9655	True;True	3030;10444	184284;184285;184286;184287;184288;184289;184290;184291;184292;184293;184294;671768	338646;338647;338648;338649;338650;338651;338652;338653;338654;338655;338656;1217190	338652;1217190			Q15008	PSMD6_HUMAN	26S proteasome non-ATPase regulatory subunit 6 OS=Homo sapiens (Human) GN=PSMD6 PE=1 SV=1	0	0.985	0.992	not checked
93	D2H1S5	D2H1S5;G1LIX2	D2H1S5;G1LIX2	Putative uncharacterized protein	tr|D2H1S5|D2H1S5_AILME Putative uncharacterized protein OS=Ailuropoda melanoleuca (Giant panda) GN=PANDA_003507 PE=4 SV=1;tr|G1LIX2|G1LIX2_AILME Uncharacterized protein OS=Ailuropoda melanoleuca (Giant panda) GN=NT5DC3 PE=4 SV=1	---	4;4	4;4	4;4	2	4	4	4	10.4	59.928	508	508;515	0	11.273				126	3824;6402;8172;9188	True;True;True;True	4073;6963;8857;9945	249157;444053;444054;444055;444056;444057;444058;444059;444060;444061;444062;444063;444064;444065;444066;550206;550207;638442	454534;813261;813262;813263;813264;813265;813266;813267;813268;813269;813270;813271;813272;813273;813274;997348;997349;1161113	454534;813268;997348;1161113			Q86UY8	NT5D3_HUMAN	5'-nucleotidase domain-containing protein 3 OS=Homo sapiens (Human) GN=NT5DC3 PE=1 SV=1	0	0.959	0.988	not checked
94	D2H267	D2H267;G1L7Z7	D2H267;G1L7Z7	Putative uncharacterized protein	tr|D2H267|D2H267_AILME Putative uncharacterized protein OS=Ailuropoda melanoleuca (Giant panda) GN=PANDA_003696 PE=3 SV=1;tr|G1L7Z7|G1L7Z7_AILME Uncharacterized protein OS=Ailuropoda melanoleuca (Giant panda) GN=ALDH4A1 PE=3 SV=1	---	2;2	2;2	2;2	2	2	2	2	6.5	59.141	540	540;570	0.0079156	3.931				128	8662;8893	True;True	9387;9631	585026;585027;585028;613564;613565	1062845;1062846;1062847;1113460;1113461	1062846;1113460			P30038	AL4A1_HUMAN	Delta-1-pyrroline-5-carboxylate dehydrogenase, mitochondrial OS=Homo sapiens (Human) GN=ALDH4A1 PE=1 SV=3	0	0.941	0.991	ok
95	D2H271	D2H271;G1L8K5	D2H271;G1L8K5	Putative uncharacterized protein	tr|D2H271|D2H271_AILME Putative uncharacterized protein OS=Ailuropoda melanoleuca (Giant panda) GN=PANDA_003702 PE=4 SV=1;tr|G1L8K5|G1L8K5_AILME Uncharacterized protein OS=Ailuropoda melanoleuca (Giant panda) GN=AKR7A2 PE=4 SV=1	---	5;5	5;5	5;5	2	5	5	5	29.1	29.6	261	261;332	0	30.615				129	664;2191;2816;7218;8756	True;True;True;True;True	717;2339;3005;7835;9490	45247;45248;45249;45250;45251;45252;45253;45254;45255;45256;45257;45258;45259;45260;45261;45262;45263;45264;142429;142430;142431;142432;142433;142434;142435;142436;142437;142438;182884;182885;182886;182887;182888;182889;182890;182891;182892;182893;182894;182895;182896;182897;182898;182899;182900;182901;182902;182903;182904;182905;182906;182907;182908;182909;182910;182911;182912;182913;182914;1829…	78589;78590;78591;78592;78593;78594;78595;78596;78597;78598;78599;78600;78601;78602;78603;78604;78605;78606;261612;261613;261614;261615;261616;261617;261618;261619;261620;261621;335739;335740;335741;335742;335743;335744;335745;335746;335747;335748;335749;335750;335751;335752;335753;335754;335755;335756;335757;335758;335759;335760;335761;335762;335763;335764;335765;335766;335767;335768;335769;3357…	78598;261612;335742;893100;1097930			O43488	ARK72_HUMAN	Aflatoxin B1 aldehyde reductase member 2 OS=Homo sapiens (Human) GN=AKR7A2 PE=1 SV=3	8.7e-127	0.912	0.985	not checked		39933		24943	63565	63002	54464	59228	83851	113980
96	D2H273	D2H273;G1L8P5	D2H273;G1L8P5	Putative uncharacterized protein	tr|D2H273|D2H273_AILME Putative uncharacterized protein OS=Ailuropoda melanoleuca (Giant panda) GN=PANDA_003704 PE=4 SV=1;tr|G1L8P5|G1L8P5_AILME Uncharacterized protein OS=Ailuropoda melanoleuca (Giant panda) GN=CAPZB PE=4 SV=1	---	13;11	13;11	13;11	2	13	13	13	55.2	31.327	277	277;314	0	75.704				130	1339;2141;2888;4713;5152;5964;6533;7099;7615;7842;7948;7972;8296	True;True;True;True;True;True;True;True;True;True;True;True;True	1422;2283;3080;5052;5535;6414;7099;7708;8263;8510;8622;8646;8990	83231;83232;83233;83234;83235;83236;83237;83238;83239;83240;83241;83242;83243;83244;139916;139917;139918;139919;139920;139921;139922;139923;139924;139925;139926;139927;139928;139929;139930;139931;139932;139933;139934;139935;139936;139937;139938;139939;139940;139941;139942;139943;139944;139945;139946;139947;139948;139949;139950;139951;139952;139953;186756;186757;186758;186759;186760;186761;186762;…	143456;143457;143458;143459;143460;143461;143462;143463;143464;143465;143466;143467;143468;143469;143470;257586;257587;257588;257589;257590;257591;257592;257593;257594;257595;257596;257597;257598;257599;257600;257601;257602;257603;257604;257605;257606;257607;257608;257609;257610;257611;257612;257613;257614;257615;257616;257617;257618;257619;257620;257621;257622;257623;257624;257625;257626;257627;…	143465;257640;342453;576798;644445;756904;831664;884454;932875;954505;962565;964436;1009388			P47756	CAPZB_HUMAN	F-actin-capping protein subunit beta OS=Homo sapiens (Human) GN=CAPZB PE=1 SV=4	1.4e-147	0.978	0.996	ok	410040	477870	523840	537070	668400	647940	523230	495860	686210	708570	495610
97	D2H2A6	D2H2A6;G1MFJ8	D2H2A6;G1MFJ8	Putative uncharacterized protein	tr|D2H2A6|D2H2A6_AILME Putative uncharacterized protein OS=Ailuropoda melanoleuca (Giant panda) GN=PANDA_003745 PE=4 SV=1;tr|G1MFJ8|G1MFJ8_AILME Uncharacterized protein OS=Ailuropoda melanoleuca (Giant panda) GN=PSMD2 PE=4 SV=1	---	4;4	4;4	4;4	2	4	4	4	6.2	100.26	908	908;913	0	7.4872				131	888;5584;8282;9724	True;True;True;True	957;6003;8976;10517	60224;60225;60226;60227;60228;60229;60230;60231;60232;60233;60234;60235;60236;60237;60238;60239;60240;60241;60242;60243;60244;60245;60246;60247;60248;60249;60250;60251;60252;60253;60254;383274;383275;383276;383277;383278;383279;383280;383281;383282;383283;383284;383285;383286;383287;383288;383289;383290;383291;383292;383293;383294;383295;383296;383297;383298;383299;383300;383301;383302;383303;383…	103530;103531;103532;103533;103534;103535;103536;103537;103538;103539;103540;103541;103542;103543;103544;103545;103546;103547;103548;103549;103550;103551;103552;103553;103554;103555;103556;103557;103558;103559;103560;103561;103562;702046;702047;702048;702049;702050;702051;702052;702053;702054;702055;702056;702057;702058;702059;702060;702061;702062;702063;702064;702065;702066;702067;702068;702069;…	103540;702070;1008398;1228213			Q13200	PSMD2_HUMAN	26S proteasome non-ATPase regulatory subunit 2 OS=Homo sapiens (Human) GN=PSMD2 PE=1 SV=3	0	0.991	0.998	ok						26411	25027	30690		36201
98	D2H2F0	D2H2F0	D2H2F0	Uncharacterized protein	tr|D2H2F0|D2H2F0_AILME Uncharacterized protein OS=Ailuropoda melanoleuca (Giant panda) GN=CPT2 PE=3 SV=1	CPT2	5	5	5	1	5	5	5	9.4	73.856	659	659	0	13.477				133	305;446;661;6022;8140	True;True;True;True;True	326;482;714;6472;8824	21767;21768;21769;21770;21771;21772;21773;21774;21775;21776;21777;21778;21779;21780;21781;21782;21783;21784;21785;21786;21787;21788;21789;21790;21791;21792;21793;21794;21795;21796;21797;21798;21799;21800;21801;21802;21803;21804;21805;21806;21807;32095;32096;32097;32098;32099;32100;32101;32102;32103;32104;32105;32106;32107;32108;32109;32110;32111;32112;32113;32114;32115;32116;32117;32118;32119;321…	37546;37547;37548;37549;37550;37551;37552;37553;37554;37555;37556;37557;37558;37559;37560;37561;37562;37563;37564;37565;37566;37567;37568;37569;37570;37571;37572;37573;37574;37575;37576;37577;37578;37579;37580;37581;37582;37583;37584;37585;37586;56132;56133;56134;56135;56136;56137;56138;56139;56140;56141;56142;56143;56144;56145;56146;56147;56148;56149;56150;56151;56152;56153;56154;56155;56156;561…	37554;56157;77789;763177;993467			P23786	CPT2_HUMAN	Carnitine O-palmitoyltransferase 2, mitochondrial OS=Homo sapiens (Human) GN=CPT2 PE=1 SV=2	0	0.879	0.973	ok	66446	67679	96137	84547	47587	37857	88482	104640	76773	107780	70473
99	D2H2L3	D2H2L3;G1LUR1	D2H2L3;G1LUR1	Putative uncharacterized protein	tr|D2H2L3|D2H2L3_AILME Putative uncharacterized protein OS=Ailuropoda melanoleuca (Giant panda) GN=PANDA_003875 PE=3 SV=1;tr|G1LUR1|G1LUR1_AILME Uncharacterized protein OS=Ailuropoda melanoleuca (Giant panda) GN=ALDH5A1 PE=3 SV=1	---	3;3	3;3	3;3	2	3	3	3	8.1	45.287	419	419;456	0.0014451	5.2305				134	5794;6401;8525	True;True;True	6229;6962;9234	400124;400125;400126;400127;400128;400129;400130;400131;400132;444038;444039;444040;444041;444042;444043;444044;444045;444046;444047;444048;444049;444050;444051;444052;574167;574168;574169;574170;574171;574172	731401;731402;731403;731404;731405;731406;731407;731408;731409;813244;813245;813246;813247;813248;813249;813250;813251;813252;813253;813254;813255;813256;813257;813258;813259;813260;1039759;1039760;1039761;1039762;1039763;1039764	731405;813248;1039760			P51649	SSDH_HUMAN	Succinate-semialdehyde dehydrogenase, mitochondrial OS=Homo sapiens (Human) GN=ALDH5A1 PE=1 SV=2	1.2e-215	0.897	0.981	ok	23895		31962			28289			32608	28202
100	D2H2Q3	D2H2Q3	D2H2Q3	Uncharacterized protein	tr|D2H2Q3|D2H2Q3_AILME Uncharacterized protein OS=Ailuropoda melanoleuca (Giant panda) GN=NDUFB3 PE=4 SV=1	NDUFB3	2	2	2	1	2	2	2	19.4	11.134	98	98	0.0014535	5.4813				135	3899;5124	True;True	4158;5504	255189;255190;350088	465864;465865;640730	465865;640730			O43676	NDUB3_HUMAN	NADH dehydrogenase [ubiquinone] 1 beta subcomplex subunit 3 OS=Homo sapiens (Human) GN=NDUFB3 PE=1 SV=3	4e-42	0.847	0.949	ok
101	D2H303	D2H303;G1L294	D2H303;G1L294	Putative uncharacterized protein	tr|D2H303|D2H303_AILME Putative uncharacterized protein OS=Ailuropoda melanoleuca (Giant panda) GN=PANDA_004040 PE=4 SV=1;tr|G1L294|G1L294_AILME Uncharacterized protein OS=Ailuropoda melanoleuca (Giant panda) GN=GSN PE=4 SV=1	---	13;13	13;13	5;5	2	13	13	5	22.7	81.212	735	735;773	0	83.342				136	269;298;1570;2204;2392;3737;5155;6743;7198;7506;8174;9157;9922	True;True;True;True;True;True;True;True;True;True;True;True;True	284;317;1674;2352;2555;3984;5538;7338;7814;8145;8859;9912;10731	14748;14749;14750;14751;14752;14753;14754;14755;14756;14757;14758;14759;14760;14761;14762;14763;14764;14765;14766;14767;14768;14769;14770;14771;21351;21352;21353;21354;21355;21356;21357;21358;21359;21360;21361;21362;21363;104029;104030;104031;143621;143622;155330;155331;155332;155333;155334;155335;155336;155337;155338;155339;155340;155341;155342;155343;155344;155345;155346;155347;155348;243256;24…	25446;25447;25448;25449;25450;25451;25452;25453;25454;25455;25456;25457;25458;25459;25460;25461;25462;25463;25464;25465;25466;25467;25468;25469;25470;25471;25472;25473;25474;36856;36857;36858;36859;36860;36861;36862;36863;36864;36865;36866;36867;36868;189748;189749;189750;263813;263814;284972;284973;284974;284975;284976;284977;284978;284979;284980;284981;284982;284983;284984;284985;284986;284987;…	25457;36858;189749;263814;284973;444703;644456;853402;891674;921446;998051;1158585;1249290			P06396	GELS_HUMAN	Gelsolin OS=Homo sapiens (Human) GN=GSN PE=1 SV=1	0	0.958	0.99	ok	114030	45262	22333		164060	167880	176010	186280	240350	244230	44496
102	D2H337	D2H337;G1L918;D2HXC6	D2H337;G1L918;D2HXC6	Putative uncharacterized protein	tr|D2H337|D2H337_AILME Putative uncharacterized protein OS=Ailuropoda melanoleuca (Giant panda) GN=PANDA_004070 PE=3 SV=1;tr|G1L918|G1L918_AILME Uncharacterized protein OS=Ailuropoda melanoleuca (Giant panda) GN=RAB5B PE=3 SV=1;tr|D2HXC6|D2HXC6_AILME Unc	---	2;2;1	2;2;1	1;1;0	3	2	2	1	11.6	23.753	215	215;217;215	0.0014164	4.9253				137	5996;6909	True;True	6446;7508	415702;415703;415704;415705;415706;415707;415708;415709;415710;415711;415712;415713;415714;415715;415716;415717;415718;415719;415720;415721;415722;415723;415724;415725;415726;415727;415728;415729;415730;415731;415732;415733;415734;415735;415736;415737;415738;415739;415740;415741;415742;415743;415744;472091;472092;472093;472094;472095;472096;472097;472098;472099	761496;761497;761498;761499;761500;761501;761502;761503;761504;761505;761506;761507;761508;761509;761510;761511;761512;761513;761514;761515;761516;761517;761518;761519;761520;761521;761522;761523;761524;761525;761526;761527;761528;761529;761530;761531;761532;761533;761534;761535;761536;761537;761538;761539;761540;761541;761542;761543;863557;863558;863559;863560;863561;863562;863563;863564;863565	761518;863561			P61020	RAB5B_HUMAN	Ras-related protein Rab-5B OS=Homo sapiens (Human) GN=RAB5B PE=1 SV=1	4.6e-90	0.995	0.995	not checked	36964	34609	45116	40703	44556	49872	49478	44616	33349	30068
103	D2H342	D2H342;G1L9M3	D2H342;G1L9M3	Uncharacterized protein	tr|D2H342|D2H342_AILME Uncharacterized protein OS=Ailuropoda melanoleuca (Giant panda) GN=PA2G4 PE=4 SV=1;tr|G1L9M3|G1L9M3_AILME Uncharacterized protein OS=Ailuropoda melanoleuca (Giant panda) GN=PA2G4 PE=4 SV=1	PA2G4	3;3	3;3	3;3	2	3	3	3	8.6	43.802	394	394;402	0.0090674	3.6448				138	496;3561;8261	True;True;True	534;3792;8953	34346;34347;232738;232739;555596;555597	59476;59477;426184;426185;1005926;1005927	59477;426185;1005926			Q9UQ80	PA2G4_HUMAN	Proliferation-associated protein 2G4 OS=Homo sapiens (Human) GN=PA2G4 PE=1 SV=3	0	0.997	0.997	ok			37718
104	D2H344	D2H344	D2H344	Putative uncharacterized protein	tr|D2H344|D2H344_AILME Putative uncharacterized protein OS=Ailuropoda melanoleuca (Giant panda) GN=PANDA_004078 PE=4 SV=1	---	14	14	4	1	14	14	4	55.2	22.907	210	210	0	150.18				139	213;465;1714;3726;4191;4763;7396;8291;8432;8734;9195;9581;9582;9583	True;True;True;True;True;True;True;True;True;True;True;True;True;True	226;501;1825;3972;4466;4467;5112;8024;8025;8985;9135;9462;9953;9954;10365;10366;10367	12263;12264;12265;12266;12267;12268;12269;12270;12271;12272;12273;12274;12275;12276;12277;12278;12279;12280;12281;12282;12283;12284;12285;12286;12287;12288;12289;12290;12291;12292;12293;12294;12295;12296;12297;12298;12299;12300;12301;12302;32742;32743;32744;32745;32746;32747;32748;32749;32750;32751;32752;32753;32754;32755;32756;32757;32758;32759;32760;32761;32762;32763;32764;32765;32766;32767;327…	21299;21300;21301;21302;21303;21304;21305;21306;21307;21308;21309;21310;21311;21312;21313;21314;21315;21316;21317;21318;21319;21320;21321;21322;21323;21324;21325;21326;21327;21328;21329;21330;21331;21332;21333;21334;21335;21336;21337;21338;21339;57100;57101;57102;57103;57104;57105;57106;57107;57108;57109;57110;57111;57112;57113;57114;57115;57116;57117;57118;57119;57120;57121;57122;57123;57124;571…	21321;57122;207682;444342;507528;584503;912319;1009212;1024597;1095541;1161509;1209701;1209745;1209774	82;83	95;132	P14649	MYL6B_HUMAN	Myosin light chain 6B OS=Homo sapiens (Human) GN=MYL6B PE=1 SV=1	1.3e-41	0.948	0.981	OK	485180	497630	1019400	920210	724520	683940	188880	337560	311490	444430	747470
105	D2H345	D2H345	D2H345	Putative uncharacterized protein	tr|D2H345|D2H345_AILME Putative uncharacterized protein OS=Ailuropoda melanoleuca (Giant panda) GN=PANDA_004079 PE=4 SV=1	---	5	4	1	1	5	4	1	34.8	15.11	135	135	0.0027624	4.4012				140	465;1507;1508;1717;3727	False;True;True;True;True	501;1608;1609;1829;3973	32742;32743;32744;32745;32746;32747;32748;32749;32750;32751;32752;32753;32754;32755;32756;32757;32758;32759;32760;32761;32762;32763;32764;32765;32766;32767;32768;32769;32770;32771;32772;32773;32774;32775;32776;32777;32778;32779;32780;32781;32782;32783;32784;32785;32786;32787;32788;32789;32790;32791;32792;32793;32794;32795;32796;32797;32798;32799;32800;32801;32802;32803;32804;32805;32806;32807;328…	57100;57101;57102;57103;57104;57105;57106;57107;57108;57109;57110;57111;57112;57113;57114;57115;57116;57117;57118;57119;57120;57121;57122;57123;57124;57125;57126;57127;57128;57129;57130;57131;57132;57133;57134;57135;57136;57137;57138;57139;57140;57141;57142;57143;57144;57145;57146;57147;57148;57149;57150;57151;57152;57153;57154;57155;57156;57157;57158;57159;57160;57161;57162;57163;57164;57165;571…	57122;184856;184880;208630;444360			P60660	MYL6_HUMAN	Myosin light polypeptide 6 OS=Homo sapiens (Human) GN=MYL6 PE=1 SV=2	5.2e-57	0.978	1	not checked			95051	96317		67715			43257		65589
106	D2H351	D2H351;G1LAP7	D2H351;G1LAP7	Putative uncharacterized protein	tr|D2H351|D2H351_AILME Putative uncharacterized protein OS=Ailuropoda melanoleuca (Giant panda) GN=PANDA_004086 PE=4 SV=1;tr|G1LAP7|G1LAP7_AILME Uncharacterized protein OS=Ailuropoda melanoleuca (Giant panda) GN=COQ10A PE=4 SV=1	---	4;4	4;4	4;4	2	4	4	4	18.2	26.13	231	231;238	0	21.876				141	665;2566;2749;5184	True;True;True;True	718;2740;2932;5568	45265;45266;45267;168256;168257;177272;177273;177274;177275;177276;353106;353107;353108;353109;353110;353111;353112;353113;353114;353115;353116;353117;353118;353119;353120;353121;353122	78607;78608;78609;78610;310981;310982;310983;326291;326292;326293;326294;326295;646183;646184;646185;646186;646187;646188;646189;646190;646191;646192;646193;646194;646195;646196;646197;646198;646199	78608;310983;326291;646186			Q96MF6	CQ10A_HUMAN	Coenzyme Q-binding protein COQ10 homolog A, mitochondrial OS=Homo sapiens (Human) GN=COQ10A PE=2 SV=2	1.6e-105	0.946	0.99	not checked			58557	39717			82881	93533
107	D2H352	D2H352;G1LAU6	D2H352;G1LAU6	Citrate synthase	tr|D2H352|D2H352_AILME Citrate synthase OS=Ailuropoda melanoleuca (Giant panda) GN=PANDA_004087 PE=3 SV=1;tr|G1LAU6|G1LAU6_AILME Citrate synthase OS=Ailuropoda melanoleuca (Giant panda) GN=CS PE=3 SV=1	---	21;21	21;21	21;21	2	21	21	21	52.9	48.731	435	435;466	0	323.31				142	51;462;463;470;922;1320;1648;1674;1932;2374;3209;3524;3648;4462;5051;5617;5758;5951;7788;8572;9605	True;True;True;True;True;True;True;True;True;True;True;True;True;True;True;True;True;True;True;True;True	54;55;498;499;506;991;1402;1758;1784;2062;2536;3417;3755;3884;4769;5424;6039;6192;6399;8447;8448;9286;10394	2200;2201;2202;2203;2204;2205;2206;2207;2208;2209;2210;2211;2212;2213;2214;2215;2216;2217;2218;2219;2220;2221;2222;2223;2224;2225;2226;2227;2228;2229;2230;2231;2232;2233;2234;2235;2236;2237;2238;2239;2240;2241;2242;2243;2244;2245;2246;2247;2248;2249;2250;2251;2252;2253;2254;2255;2256;2257;2258;2259;2260;2261;2262;2263;2264;2265;2266;2267;2268;2269;2270;2271;2272;2273;2274;2275;2276;2277;2278;2279…	3202;3203;3204;3205;3206;3207;3208;3209;3210;3211;3212;3213;3214;3215;3216;3217;3218;3219;3220;3221;3222;3223;3224;3225;3226;3227;3228;3229;3230;3231;3232;3233;3234;3235;3236;3237;3238;3239;3240;3241;3242;3243;3244;3245;3246;3247;3248;3249;3250;3251;3252;3253;3254;3255;3256;3257;3258;3259;3260;3261;3262;3263;3264;3265;3266;3267;3268;3269;3270;3271;3272;3273;3274;3275;3276;3277;3278;3279;3280;3281…	3319;56936;56985;58485;105852;141919;201881;204871;227787;283554;368546;417952;434659;540124;632991;705044;728003;755726;948779;1049224;1213059	84;85	123;134	O75390	CISY_HUMAN	Citrate synthase, mitochondrial OS=Homo sapiens (Human) GN=CS PE=1 SV=2	0	0.97	0.991	ok	2837400	3139700	4166400	4046000	2959300	2377500	3846700	3145000	2922200	2980300	3605600
108	D2H363	D2H363	D2H363	ATP synthase subunit beta	tr|D2H363|D2H363_AILME ATP synthase subunit beta OS=Ailuropoda melanoleuca (Giant panda) GN=ATP5B PE=3 SV=1	ATP5B	27	27	27	1	27	27	27	69.9	56.368	528	528	0	323.31				143	344;352;1505;1923;2650;2787;2980;3351;3992;3993;4205;4268;4272;4628;5993;6010;6965;7762;7763;8234;8448;8551;8654;8656;9099;9100;9551	True;True;True;True;True;True;True;True;True;True;True;True;True;True;True;True;True;True;True;True;True;True;True;True;True;True;True	368;377;1606;2052;2053;2827;2828;2972;3177;3178;3572;4255;4256;4488;4489;4556;4557;4558;4562;4949;6443;6460;7568;7569;7570;8417;8418;8419;8921;8922;9152;9153;9261;9262;9375;9377;9378;9849;9850;10328	25466;25467;25468;25469;25470;25471;25472;25473;25474;25475;25476;25477;25478;25479;25480;25481;25482;25483;25484;25485;25486;25487;25488;25489;25490;25491;25492;25493;25494;25495;25496;25497;25498;25499;25500;25501;25502;25503;25504;25505;25506;25507;25508;25509;25510;25511;25512;25513;25514;25515;25516;25517;25518;25519;25520;25521;25522;25523;25524;25525;25526;25527;25528;25529;25530;25531;255…					P06576	ATPB_HUMAN	ATP synthase subunit beta, mitochondrial OS=Homo sapiens (Human) GN=ATP5B PE=1 SV=3	0	0.972	0.989	ok	20339000	21595000	29124000	28221000	25620000	23635000	26393000	26225000	22412000	24262000	21990000
109	D2H3N4	D2H3N4;G1MB47	D2H3N4;G1MB47	Putative uncharacterized protein	tr|D2H3N4|D2H3N4_AILME Putative uncharacterized protein OS=Ailuropoda melanoleuca (Giant panda) GN=PANDA_004323 PE=4 SV=1;tr|G1MB47|G1MB47_AILME Uncharacterized protein OS=Ailuropoda melanoleuca (Giant panda) GN=THBS4 PE=4 SV=1	---	7;7	7;7	5;5	2	7	7	5	9.9	100.99	918	918;984	0	16.907				145	827;990;1081;3855;6655;6973;7906	True;True;True;True;True;True;True	893;1059;1154;4105;7239;7579;8577	53917;64576;69363;69364;69365;69366;69367;250247;461418;461419;461420;461421;461422;461423;461424;461425;461426;461427;461428;476920;476921;476922;476923;476924;476925;476926;476927;476928;476929;476930;476931;530656;530657	91752;110403;119564;119565;119566;119567;119568;456212;846629;846630;846631;846632;846633;846634;846635;846636;846637;846638;846639;871537;871538;871539;871540;871541;871542;871543;871544;871545;871546;871547;871548;871549;959530;959531	91752;110403;119566;456212;846638;871541;959531			P35443	TSP4_HUMAN	Thrombospondin-4 OS=Homo sapiens (Human) GN=THBS4 PE=1 SV=2	0	0.935	0.977	not checked					218340	47170
110	D2H3P2	D2H3P2;G1MBJ2	D2H3P2;G1MBJ2	Putative uncharacterized protein	tr|D2H3P2|D2H3P2_AILME Putative uncharacterized protein OS=Ailuropoda melanoleuca (Giant panda) GN=PANDA_004332 PE=3 SV=1;tr|G1MBJ2|G1MBJ2_AILME Uncharacterized protein OS=Ailuropoda melanoleuca (Giant panda) GN=CKMT2 PE=3 SV=1	---	24;22	24;22	21;19	2	24	24	21	61.3	47.478	419	419;421	0	323.31				146	807;2365;3198;3395;3484;3661;3665;3687;4413;4654;5188;5189;5291;5318;5319;5787;7280;7300;7550;7551;8154;8545;9198;9292	True;True;True;True;True;True;True;True;True;True;True;True;True;True;True;True;True;True;True;True;True;True;True;True	870;2525;2526;3406;3617;3712;3713;3897;3901;3902;3926;4716;4976;4977;5572;5573;5682;5712;5713;5714;6221;6222;7899;7900;7922;8192;8193;8838;9254;9255;9957;9958;10060	53049;53050;53051;53052;53053;53054;53055;53056;53057;53058;53059;53060;53061;53062;53063;53064;53065;53066;53067;53068;53069;53070;53071;53072;53073;53074;53075;53076;53077;53078;53079;53080;53081;53082;53083;53084;53085;53086;53087;53088;53089;53090;53091;53092;53093;53094;53095;53096;53097;53098;53099;53100;53101;53102;53103;53104;53105;53106;53107;53108;53109;53110;53111;53112;53113;53114;531…	90582;90583;90584;90585;90586;90587;90588;90589;90590;90591;90592;90593;90594;90595;90596;90597;90598;90599;90600;90601;90602;90603;90604;90605;90606;90607;90608;90609;90610;90611;90612;90613;90614;90615;90616;90617;90618;90619;90620;90621;90622;90623;90624;90625;90626;90627;90628;90629;90630;90631;90632;90633;90634;90635;90636;90637;90638;90639;90640;90641;90642;90643;90644;90645;90646;90647;906…				P17540	KCRS_HUMAN	Creatine kinase S-type, mitochondrial OS=Homo sapiens (Human) GN=CKMT2 PE=1 SV=2	0	0.955	0.986	OK	7632900	7896800	12909000	12548000	11086000	11272000	11704000	10446000	9073300	8594200	9967600
111	D2H3S2	D2H3S2	D2H3S2	Uncharacterized protein	tr|D2H3S2|D2H3S2_AILME Uncharacterized protein OS=Ailuropoda melanoleuca (Giant panda) GN=QDPR PE=4 SV=1	QDPR	10	10	10	1	10	10	10	53.1	25.569	241	241	0	62.923				147	48;1247;2870;4760;6636;6647;7177;8136;8721;9185	True;True;True;True;True;True;True;True;True;True	50;51;1329;3061;5106;5107;7217;7228;7229;7230;7793;8820;9449;9942	2151;2152;2153;2154;2155;2156;2157;2158;2159;2160;2161;2162;2163;2164;2165;2166;2167;2168;2169;2170;2171;2172;2173;2174;2175;2176;2177;2178;2179;2180;2181;2182;77785;77786;77787;77788;77789;77790;77791;77792;77793;77794;77795;77796;77797;77798;77799;77800;77801;77802;77803;77804;77805;77806;77807;77808;77809;77810;77811;77812;77813;77814;77815;77816;77817;77818;77819;77820;77821;77822;77823;77824…	3153;3154;3155;3156;3157;3158;3159;3160;3161;3162;3163;3164;3165;3166;3167;3168;3169;3170;3171;3172;3173;3174;3175;3176;3177;3178;3179;3180;3181;3182;3183;3184;134072;134073;134074;134075;134076;134077;134078;134079;134080;134081;134082;134083;134084;134085;134086;134087;134088;134089;134090;134091;134092;134093;134094;134095;134096;134097;134098;134099;134100;134101;134102;134103;134104;134105;1…	3176;134115;340172;584321;844843;846338;890354;993374;1094536;1161028	104;105;106;107	144;149;168;186	P09417	DHPR_HUMAN	Dihydropteridine reductase OS=Homo sapiens (Human) GN=QDPR PE=1 SV=2	1.8e-123	0.959	0.992	ok	433670	428170	454750	459960	605090	624290	436040	422830	658420	613980	527600
112	D2H3S4	D2H3S4;G1L4M4	D2H3S4;G1L4M4	Putative uncharacterized protein	tr|D2H3S4|D2H3S4_AILME Putative uncharacterized protein OS=Ailuropoda melanoleuca (Giant panda) GN=PANDA_004368 PE=3 SV=1;tr|G1L4M4|G1L4M4_AILME Uncharacterized protein OS=Ailuropoda melanoleuca (Giant panda) GN=LAP3 PE=3 SV=1	---	7;7	7;7	7;7	2	7	7	7	20.4	56.224	519	519;521	0	40.795				148	1995;3332;3361;5590;8170;8277;8336	True;True;True;True;True;True;True	2126;3552;3582;6010;8855;8969;9032	127280;127281;127282;127283;127284;127285;211140;211141;211142;211143;211144;211145;211146;211147;211148;211149;211150;211151;211152;211153;212409;212410;383790;383791;383792;383793;383794;383795;383796;383797;383798;383799;383800;383801;383802;383803;383804;383805;383806;383807;383808;383809;383810;383811;383812;383813;383814;383815;383816;383817;383818;550190;550191;550192;550193;550194;550195;…	231864;231865;231866;231867;231868;231869;384251;384252;384253;384254;384255;384256;384257;384258;384259;384260;384261;384262;384263;384264;386120;386121;702863;702864;702865;702866;702867;702868;702869;702870;702871;702872;702873;702874;702875;702876;702877;702878;702879;702880;702881;702882;702883;702884;702885;702886;702887;702888;702889;702890;702891;702892;997332;997333;997334;997335;997336;…	231866;384254;386121;702877;997336;1008141;1014692			P28838	AMPL_HUMAN	Cytosol aminopeptidase OS=Homo sapiens (Human) GN=LAP3 PE=1 SV=3	0	0.915	0.988	ok			45974	53177	29990		47916	46011		24094
113	D2H3W8	D2H3W8;G1MDU7	D2H3W8;G1MDU7	Putative uncharacterized protein	tr|D2H3W8|D2H3W8_AILME Putative uncharacterized protein OS=Ailuropoda melanoleuca (Giant panda) GN=PANDA_004422 PE=3 SV=1;tr|G1MDU7|G1MDU7_AILME Uncharacterized protein OS=Ailuropoda melanoleuca (Giant panda) GN=HSPA5 PE=3 SV=1	---	18;18	15;15	15;15	2	18	15	15	33.9	72.252	654	654;655	0	62.054				149	409;1112;1465;2061;4058;4060;4411;4800;5331;5910;6387;6620;7862;8144;8576;8811;9491;9644	True;True;True;True;False;True;True;True;False;True;True;True;True;True;True;False;True;True	443;1187;1566;2199;4323;4325;4714;5151;5727;6354;6948;7200;8530;8828;9290;9547;10263;10433	30480;30481;30482;30483;30484;30485;70781;70782;70783;98795;135132;135133;135134;135135;135136;135137;135138;135139;135140;135141;135142;135143;135144;135145;135146;268366;268367;268368;268369;268370;268371;268372;268373;268374;268375;268376;268377;268378;268379;268380;268381;268382;268383;268384;268385;268386;268387;268388;268389;268390;268391;268392;268393;268394;268395;268396;268397;268398;268…	53596;53597;53598;53599;53600;53601;121508;121509;121510;180828;248895;248896;248897;248898;248899;248900;248901;248902;248903;248904;248905;248906;248907;248908;248909;489537;489538;489539;489540;489541;489542;489543;489544;489545;489546;489547;489548;489549;489550;489551;489552;489553;489554;489555;489556;489557;489558;489559;489560;489561;489562;489563;489564;489565;489566;489567;489568;489569…	53599;121509;180828;248903;489582;489995;535201;587001;668307;751492;812200;843306;955810;993485;1049301;1105313;1196375;1216487			P11021	GRP78_HUMAN	78 kDa glucose-regulated protein OS=Homo sapiens (Human) GN=HSPA5 PE=1 SV=2	0	0.991	0.998	OK	44594		108500	53746	97601	57363	101910	110550	68945	107610
114	D2H449	D2H449;G1LTE1	D2H449;G1LTE1	Putative uncharacterized protein	tr|D2H449|D2H449_AILME Putative uncharacterized protein OS=Ailuropoda melanoleuca (Giant panda) GN=PANDA_004532 PE=4 SV=1;tr|G1LTE1|G1LTE1_AILME Uncharacterized protein OS=Ailuropoda melanoleuca (Giant panda) GN=CEP250 PE=4 SV=1	---	7;7	7;7	7;7	2	7	7	7	3.7	279.36	2442	2442;2446	0.0090439	3.6117				150	2040;5103;5532;6926;7139;7642;8244	True;True;True;True;True;True;True	2175;5482;5936;7526;7752;8290;8932	133924;133925;133926;348812;377414;377415;472538;486102;486103;486104;486105;486106;486107;486108;486109;486110;486111;486112;486113;486114;486115;515623;554910	246708;246709;246710;638550;691830;691831;864107;886695;886696;886697;886698;886699;886700;886701;886702;886703;886704;886705;886706;886707;886708;935099;1004983	246710;638550;691830;864107;886697;935099;1004983			Q9BV73	CP250_HUMAN	Centrosome-associated protein CEP250 OS=Homo sapiens (Human) GN=CEP250 PE=1 SV=2	0	0.827	0.947	not checked							54782	62932			47334
115	D2H479	D2H479;G1MF30	D2H479;G1MF30	Putative uncharacterized protein	tr|D2H479|D2H479_AILME Putative uncharacterized protein OS=Ailuropoda melanoleuca (Giant panda) GN=PANDA_004561 PE=4 SV=1;tr|G1MF30|G1MF30_AILME Uncharacterized protein OS=Ailuropoda melanoleuca (Giant panda) GN=RAD23B PE=4 SV=1	---	3;3	3;3	2;2	2	3	3	2	9.3	40.476	386	386;410	0	30.447				151	1097;2258;7022	True;True;True	1171;2413;7630	70047;70048;70049;70050;148534;148535;148536;148537;148538;148539;479184;479185;479186;479187;479188;479189;479190;479191;479192;479193;479194;479195;479196;479197;479198;479199;479200;479201;479202;479203;479204;479205;479206;479207;479208;479209;479210;479211;479212;479213;479214;479215;479216;479217;479218;479219;479220;479221;479222;479223;479224;479225;479226;479227;479228	120500;120501;120502;120503;273567;273568;273569;273570;273571;273572;875282;875283;875284;875285;875286;875287;875288;875289;875290;875291;875292;875293;875294;875295;875296;875297;875298;875299;875300;875301;875302;875303;875304;875305;875306;875307;875308;875309;875310;875311;875312;875313;875314;875315;875316;875317;875318;875319;875320;875321;875322;875323;875324;875325;875326;875327;875328;…	120502;273570;875288			P54727	RD23B_HUMAN	UV excision repair protein RAD23 homolog B OS=Homo sapiens (Human) GN=RAD23B PE=1 SV=1	3.4e-62	0.925	0.974	ok	29375	27260			37913	31476	27751	28400		33967
116	D2H496	D2H496;D2I7P0	D2H496;D2I7P0;H1AGA3	Uncharacterized protein	tr|D2H496|D2H496_AILME Uncharacterized protein OS=Ailuropoda melanoleuca (Giant panda) GN=LOC100481739 PE=3 SV=1;tr|D2I7P0|D2I7P0_AILME Uncharacterized protein OS=Ailuropoda melanoleuca (Giant panda) GN=ACTG1 PE=3 SV=1	LOC100481739	31;30;14	12;11;8	10;9;7	3	31	12	10	77.1	41.746	375	375;375;169	0	272.09				152	281;850;851;971;1035;1151;1319;1428;1429;1443;1585;1586;2009;2010;2029;3520;3692;3693;3694;4035;4036;4098;4485;4570;4990;5026;6961;7296;8018;8511;8669	False;False;False;True;True;True;True;False;False;True;False;False;False;False;True;True;False;False;False;False;False;False;False;True;True;False;True;False;False;True;True	297;917;918;1040;1105;1226;1401;1516;1517;1518;1519;1537;1538;1690;1691;2140;2141;2142;2164;3750;3931;3932;3933;3934;3935;3936;3937;4299;4300;4367;4792;4888;4889;5361;5362;5398;7564;7918;8694;9219;9395	15567;15568;15569;15570;15571;15572;15573;15574;15575;15576;15577;15578;15579;15580;15581;15582;15583;15584;15585;15586;15587;15588;15589;15590;15591;15592;15593;15594;15595;15596;15597;15598;15599;15600;15601;15602;15603;15604;15605;15606;15607;15608;15609;15610;15611;15612;15613;15614;15615;15616;15617;15618;15619;15620;15621;15622;15623;15624;15625;15626;15627;15628;15629;15630;15631;15632;156…					P60709	ACTB_HUMAN	Actin, cytoplasmic 1 OS=Homo sapiens (Human) GN=ACTB PE=1 SV=1	3e-189	0.997	0.997	ok	1005000	1178200	1530500	1362400	1356100	1395700	1588400	1094700	1164800	1473800	1503900
117	D2H4D1	D2H4D1;G1LVT1	D2H4D1;G1LVT1	Putative uncharacterized protein	tr|D2H4D1|D2H4D1_AILME Putative uncharacterized protein OS=Ailuropoda melanoleuca (Giant panda) GN=PANDA_004636 PE=4 SV=1;tr|G1LVT1|G1LVT1_AILME Uncharacterized protein OS=Ailuropoda melanoleuca (Giant panda) GN=KLHL41 PE=4 SV=1	---	31;31	31;31	31;31	2	31	31	31	51.5	68.116	606	606;607	0	249.28				153	266;1014;1015;1295;1826;1827;1864;1865;2145;2405;2409;2421;2583;2711;3215;4508;4599;4928;5250;5342;6076;6525;7324;7784;7894;8865;9648;9690;9788;9817;9859	True;True;True;True;True;True;True;True;True;True;True;True;True;True;True;True;True;True;True;True;True;True;True;True;True;True;True;True;True;True;True	280;1084;1085;1377;1945;1946;1987;1988;2287;2568;2572;2585;2586;2758;2892;3424;3425;4818;4918;5290;5638;5738;6526;7091;7947;8441;8564;9603;10437;10481;10482;10586;10622;10666	14542;65222;65223;65224;65225;65226;65227;65228;65229;65230;65231;65232;65233;65234;65235;65236;65237;65238;65239;80405;80406;80407;80408;80409;80410;80411;80412;80413;80414;80415;80416;80417;80418;80419;80420;80421;80422;80423;80424;80425;80426;80427;80428;80429;80430;80431;80432;80433;80434;80435;80436;80437;80438;80439;80440;80441;80442;80443;80444;80445;80446;80447;80448;80449;80450;80451;804…	25014;111256;111257;111258;111259;111260;111261;111262;111263;111264;111265;111266;111267;111268;111269;111270;111271;111272;111273;111274;111275;111276;111277;111278;111279;111280;111281;111282;137856;137857;137858;137859;137860;137861;137862;137863;137864;137865;137866;137867;137868;137869;137870;137871;137872;137873;137874;137875;137876;137877;137878;137879;137880;137881;137882;137883;137884;1…	25014;111262;111282;137882;216487;216506;218829;218993;257703;285572;285983;287192;312901;324382;369322;551188;561332;597167;653161;669109;768534;826409;906694;948655;959145;1111494;1216520;1219207;1235970;1240046;1243280	114;115	66;525	O60662	KLH41_HUMAN	Kelch-like protein 41 OS=Homo sapiens (Human) GN=KLHL41 PE=1 SV=2	0	0.97	0.997	ok	1671600	1722000	2772300	2632800	2412200	2460100	2672800	2668300	2577700	2632800	1929400
118	D2H4D7	D2H4D7;G1LWJ8	D2H4D7;G1LWJ8	Putative uncharacterized protein	tr|D2H4D7|D2H4D7_AILME Putative uncharacterized protein OS=Ailuropoda melanoleuca (Giant panda) GN=PANDA_004644 PE=4 SV=1;tr|G1LWJ8|G1LWJ8_AILME Uncharacterized protein OS=Ailuropoda melanoleuca (Giant panda) GN=NOSTRIN PE=4 SV=1	---	2;1	2;1	2;1	2	2	2	2	8.2	56.941	503	503;562	0.0027473	4.3606				154	4369;5418	True;True	4668;5819	290443;290444;290445;290446;290447;290448;369900;369901;369902;369903;369904;369905;369906;369907;369908;369909;369910;369911;369912;369913;369914;369915	529738;529739;529740;529741;529742;529743;529744;679080;679081;679082;679083;679084;679085;679086;679087;679088;679089;679090;679091;679092;679093;679094;679095;679096;679097	529739;679091			Q8IVI9	NOSTN_HUMAN	Nostrin OS=Homo sapiens (Human) GN=NOSTRIN PE=1 SV=2	1.2e-143	0.815	0.936	ok										577560
119	D2H4I5	D2H4I5;G1LMH6;G1LKL7	D2H4I5;G1LMH6;G1LKL7	Elongation factor 1-alpha	tr|D2H4I5|D2H4I5_AILME Elongation factor 1-alpha OS=Ailuropoda melanoleuca (Giant panda) GN=PANDA_004708 PE=3 SV=1;tr|G1LMH6|G1LMH6_AILME Elongation factor 1-alpha OS=Ailuropoda melanoleuca (Giant panda) GN=LOC100480871 PE=3 SV=1;tr|G1LKL7|G1LKL7_AILME E	---	10;9;6	4;4;2	2;2;1	3	10	4	2	33	50.725	467	467;469;471	0	14.458				155	1271;3979;5636;6559;7071;7201;7961;8218;8831;10139	True;False;False;False;False;True;False;False;True;True	1353;4242;6059;7132;7680;7817;8635;8905;9568;10962	79478;79479;79480;79481;79482;79483;79484;79485;79486;79487;79488;79489;79490;79491;79492;79493;79494;260645;260646;260647;260648;260649;260650;260651;260652;260653;260654;260655;260656;260657;260658;260659;260660;260661;260662;260663;260664;260665;260666;260667;260668;260669;260670;260671;260672;260673;260674;260675;260676;260677;260678;260679;260680;260681;260682;260683;260684;260685;260686;260…	136620;136621;136622;136623;136624;136625;136626;136627;136628;136629;136630;136631;136632;136633;136634;136635;136636;476050;476051;476052;476053;476054;476055;476056;476057;476058;476059;476060;476061;476062;476063;476064;476065;476066;476067;476068;476069;476070;476071;476072;476073;476074;476075;476076;476077;476078;476079;476080;476081;476082;476083;476084;476085;476086;476087;476088;476089;…	136628;476207;705699;837006;881317;892100;963373;1001214;1108016;1266483			P68104	EF1A1_HUMAN	Elongation factor 1-alpha 1 OS=Homo sapiens (Human) GN=EEF1A1 PE=1 SV=1	0	0.987	0.989	ok	444900	508540	616650	647810	555880	265500	601040	579640	576450	576860	393980
120	G1LQU3	G1LQU3;D2H4K0;G1LQV1	G1LQU3;D2H4K0;G1LQV1	Uncharacterized protein	tr|G1LQU3|G1LQU3_AILME Uncharacterized protein OS=Ailuropoda melanoleuca (Giant panda) GN=DNM1L PE=3 SV=1;tr|D2H4K0|D2H4K0_AILME Putative uncharacterized protein OS=Ailuropoda melanoleuca (Giant panda) GN=PANDA_004723 PE=3 SV=1;tr|G1LQV1|G1LQV1_AILME Unc	DNM1L	3;3;3	3;3;3	3;3;3	3	3	3	3	8.5	82.1	738	738;745;758	0	6.9551				156	5294;5679;8328	True;True;True	5685;6106;9024	361284;361285;389729;389730;389731;389732;560117;560118;560119;560120;560121;560122;560123;560124;560125;560126;560127;560128;560129	664646;664647;713712;713713;713714;713715;1013751;1013752;1013753;1013754;1013755;1013756;1013757;1013758;1013759;1013760;1013761;1013762;1013763	664646;713714;1013758			O00429	DNM1L_HUMAN	Dynamin-1-like protein OS=Homo sapiens (Human) GN=DNM1L PE=1 SV=2	0	0.991	0.995	ok			16123	18666	14723	13669		8903.3
121	D2H4M7	D2H4M7;G1MFH6;G1L2T4;G1L2T8	D2H4M7;G1MFH6;G1L2T4;G1L2T8;D2HXX6	Putative uncharacterized protein	tr|D2H4M7|D2H4M7_AILME Putative uncharacterized protein OS=Ailuropoda melanoleuca (Giant panda) GN=PANDA_004764 PE=3 SV=1;tr|G1MFH6|G1MFH6_AILME Uncharacterized protein OS=Ailuropoda melanoleuca (Giant panda) GN=RAB1B PE=3 SV=1;tr|G1L2T4|G1L2T4_AILME Unc	---	3;3;2;2;1	3;3;2;2;1	2;2;1;1;1	5	3	3	2	21.4	21.536	196	196;201;204;205;173	0.0040984	4.2952				157	1863;5489;6156	True;True;True	1986;5891;6643	120060;374786;374787;374788;374789;374790;374791;374792;374793;374794;374795;374796;374797;374798;374799;374800;374801;374802;374803;374804;374805;374806;374807;374808;374809;374810;374811;374812;374813;374814;374815;374816;374817;426822	218816;687644;687645;687646;687647;687648;687649;687650;687651;687652;687653;687654;687655;687656;687657;687658;687659;687660;687661;687662;687663;687664;687665;687666;687667;687668;687669;687670;687671;687672;687673;687674;687675;687676;687677;782322	218816;687663;782322			Q9H0U4	RAB1B_HUMAN	Ras-related protein Rab-1B OS=Homo sapiens (Human) GN=RAB1B PE=1 SV=1	2e-78	1	1	not checked	76343	72361	93363	84258	39135	42548		103910			77677
122	D2H4P3	D2H4P3;G1MG27	D2H4P3;G1MG27	Putative uncharacterized protein	tr|D2H4P3|D2H4P3_AILME Putative uncharacterized protein OS=Ailuropoda melanoleuca (Giant panda) GN=PANDA_004783 PE=4 SV=1;tr|G1MG27|G1MG27_AILME Uncharacterized protein OS=Ailuropoda melanoleuca (Giant panda) GN=CFL1 PE=4 SV=1	---	7;7	3;3	3;3	2	7	3	3	49.7	18.371	165	165;226	0	13.756				158	733;864;1808;2293;4579;6462;9786	True;True;False;False;False;True;False	790;931;1925;2451;4898;7026;10584	48601;58459;58460;58461;117770;150258;308277;308278;308279;308280;308281;308282;308283;308284;308285;308286;308287;308288;308289;308290;308291;308292;308293;308294;308295;308296;308297;308298;308299;308300;308301;308302;308303;308304;308305;308306;308307;308308;308309;308310;308311;308312;308313;308314;308315;308316;308317;308318;308319;308320;308321;308322;308323;308324;446232;446233;446234;4462…	83673;100918;100919;100920;215347;276227;560390;560391;560392;560393;560394;560395;560396;560397;560398;560399;560400;560401;560402;560403;560404;560405;560406;560407;560408;560409;560410;560411;560412;560413;560414;560415;560416;560417;560418;560419;560420;560421;560422;560423;560424;560425;560426;560427;560428;560429;560430;560431;560432;560433;560434;560435;560436;560437;560438;560439;560440;5…	83673;100920;215347;276227;560444;816452;1235872			P23528	COF1_HUMAN	Cofilin-1 OS=Homo sapiens (Human) GN=CFL1 PE=1 SV=3	9.1e-86	1	1	ok				23031			28311	28983
123	G1MHL0	G1MHL0;D2H4S8	G1MHL0;D2H4S8	Alpha-1,4 glucan phosphorylase	tr|G1MHL0|G1MHL0_AILME Alpha-1,4 glucan phosphorylase OS=Ailuropoda melanoleuca (Giant panda) GN=PYGM PE=3 SV=1;tr|D2H4S8|D2H4S8_AILME Alpha-1,4 glucan phosphorylase OS=Ailuropoda melanoleuca (Giant panda) GN=PANDA_004837 PE=3 SV=1	PYGM	67;67	67;67	54;54	2	67	67	54	67.8	97.297	842	842;846	0	323.31				159	618;619;692;915;1221;1340;1693;2018;2019;2434;2542;2617;3141;3142;3516;3517;3640;3651;3814;3972;3973;4023;4024;4184;4225;4726;4797;4874;5050;5364;5415;5514;5515;5612;6252;6253;6491;6576;6779;6963;7079;7124;7225;7332;7344;7345;7412;7875;7876;8088;8237;8440;8463;8464;8555;8603;8645;8796;8838;8991;9016;9190;9728;9737;9752;9828;9885	True;True;True;True;True;True;True;True;True;True;True;True;True;True;True;True;True;True;True;True;True;True;True;True;True;True;True;True;True;True;True;True;True;True;True;True;True;True;True;True;True;True;True;True;True;True;True;True;True;True;True;True;True;True;True;True;True;True;True;True;True;True;True;True;True;True;True	667;668;745;984;1301;1423;1424;1425;1803;2151;2152;2600;2714;2794;3347;3348;3746;3747;3876;3887;4061;4062;4234;4235;4287;4288;4459;4510;4511;5065;5147;5229;5230;5423;5762;5816;5917;5918;6034;6785;6786;6787;6788;7056;7154;7155;7374;7566;7688;7737;7842;7955;7969;7970;7971;8043;8543;8544;8770;8925;9144;9169;9170;9267;9268;9320;9363;9364;9531;9575;9733;9764;9765;9947;10521;10532;10547;10548;10633;106…	42485;42486;42487;42488;42489;42490;42491;42492;42493;42494;42495;42496;42497;42498;42499;42500;42501;42502;42503;42504;42505;42506;42507;42508;42509;42510;42511;42512;42513;42514;42515;42516;42517;42518;42519;42520;42521;42522;42523;42524;42525;42526;42527;42528;42529;42530;42531;42532;42533;42534;42535;42536;42537;42538;42539;42540;42541;42542;42543;42544;42545;42546;42547;42548;42549;42550;425…					P11217	PYGM_HUMAN	Glycogen phosphorylase, muscle form OS=Homo sapiens (Human) GN=PYGM PE=1 SV=6	0	0.975	0.993	ok	39270000	41018000	41967000	40843000	44792000	44574000	46532000	45869000	52745000	56972000	30639000
124	D2H4T3	D2H4T3;G1MHY5	D2H4T3;G1MHY5	Putative uncharacterized protein	tr|D2H4T3|D2H4T3_AILME Putative uncharacterized protein OS=Ailuropoda melanoleuca (Giant panda) GN=PANDA_004844 PE=4 SV=1;tr|G1MHY5|G1MHY5_AILME Uncharacterized protein OS=Ailuropoda melanoleuca (Giant panda) GN=PRDX5 PE=4 SV=1	---	3;3	3;3	3;3	2	3	3	3	25.5	16.53	157	157;219	0	7.9443				160	2317;8222;9221	True;True;True	2476;8909;9984	151544;151545;151546;151547;151548;151549;552877;552878;552879;552880;639633;639634;639635;639636	278461;278462;278463;278464;278465;278466;1001288;1001289;1001290;1001291;1162623;1162624;1162625;1162626	278462;1001290;1162625			P30044	PRDX5_HUMAN	Peroxiredoxin-5, mitochondrial OS=Homo sapiens (Human) GN=PRDX5 PE=1 SV=4	2.9e-70	0.904	0.975	ok			33688					34024
125	D2H4W3	D2H4W3;G1M7K6	D2H4W3;G1M7K6	Putative uncharacterized protein	tr|D2H4W3|D2H4W3_AILME Putative uncharacterized protein OS=Ailuropoda melanoleuca (Giant panda) GN=PANDA_004882 PE=4 SV=1;tr|G1M7K6|G1M7K6_AILME Uncharacterized protein OS=Ailuropoda melanoleuca (Giant panda) GN=IMPA1 PE=4 SV=1	---	7;7	7;7	7;7	2	7	7	7	30.7	30.191	277	277;334	0	21.265				161	2000;5431;5753;7752;7902;7985;8553	True;True;True;True;True;True;True	2131;5832;6187;8407;8573;8660;9264	127304;370759;370760;370761;370762;370763;370764;370765;370766;370767;370768;370769;370770;370771;370772;370773;370774;370775;370776;397672;397673;397674;397675;397676;397677;397678;397679;397680;397681;397682;397683;521413;521414;521415;521416;521417;521418;521419;521420;521421;521422;521423;521424;521425;530479;530480;530481;530482;530483;534939;534940;534941;534942;534943;534944;534945;534946;…	231891;680303;680304;680305;680306;680307;680308;680309;680310;680311;680312;680313;680314;680315;680316;680317;680318;680319;680320;727863;727864;727865;727866;727867;727868;727869;727870;727871;727872;727873;727874;944280;944281;944282;944283;944284;944285;944286;944287;944288;944289;944290;944291;944292;959280;959281;959282;959283;959284;965280;965281;965282;965283;965284;965285;965286;965287;…	231891;680305;727873;944283;959280;965299;1043960			P29218	IMPA1_HUMAN	Inositol monophosphatase 1 OS=Homo sapiens (Human) GN=IMPA1 PE=1 SV=1	1.1e-168	0.91	0.978	ok					42146	42479			55125
126	D2H4W9	D2H4W9;J7FAN4;G1M7V2	D2H4W9;J7FAN4;G1M7V2	Putative uncharacterized protein	tr|D2H4W9|D2H4W9_AILME Putative uncharacterized protein OS=Ailuropoda melanoleuca (Giant panda) GN=PANDA_004888 PE=3 SV=1;tr|J7FAN4|J7FAN4_AILME Fatty acid binding protein 5 OS=Ailuropoda melanoleuca (Giant panda) GN=FABP5 PE=2 SV=1;tr|G1M7V2|G1M7V2_AILM	---	2;2;1	2;2;1	2;2;1	3	2	2	2	17.1	13.002	117	117;135;135	0	10.479				162	786;8524	True;True	849;9233	51708;51709;51710;51711;574166	88542;88543;88544;88545;88546;88547;88548;1039758	88544;1039758			Q01469	FABP5_HUMAN	Fatty acid-binding protein, epidermal OS=Homo sapiens (Human) GN=FABP5 PE=1 SV=3	1.6e-50	0.88	0.983	ok
127	D2H532	D2H532;G1LBY9	D2H532;G1LBY9;D2HW92	Putative uncharacterized protein	tr|D2H532|D2H532_AILME Putative uncharacterized protein OS=Ailuropoda melanoleuca (Giant panda) GN=PANDA_004958 PE=4 SV=1;tr|G1LBY9|G1LBY9_AILME Uncharacterized protein OS=Ailuropoda melanoleuca (Giant panda) GN=CACNB1 PE=4 SV=1	---	5;5;2	5;5;2	3;3;0	3	5	5	3	11.3	64.359	585	585;609;549	0	12.49				163	457;784;7897;8355;8476	True;True;True;True;True	493;845;8567;9052;9182	32558;32559;32560;32561;51599;51600;51601;51602;51603;51604;51605;51606;51607;51608;51609;530363;530364;561137;561138;561139;561140;561141;561142;561143;561144;561145;561146;561147;561148;561149;561150;561151;561152;561153;561154;561155;561156;561157;561158;561159;561160;561161;561162;561163;561164;561165;561166;561167;561168;561169;561170;561171;561172;569411;569412;569413;569414;569415;569416;5…	56835;56836;56837;56838;88397;88398;88399;88400;88401;88402;88403;88404;88405;88406;88407;959157;959158;1015706;1015707;1015708;1015709;1015710;1015711;1015712;1015713;1015714;1015715;1015716;1015717;1015718;1015719;1015720;1015721;1015722;1015723;1015724;1015725;1015726;1015727;1015728;1015729;1015730;1015731;1015732;1015733;1015734;1015735;1015736;1015737;1015738;1015739;1015740;1015741;1028606…	56837;88397;959158;1015729;1028611			Q02641	CACB1_HUMAN	Voltage-dependent L-type calcium channel subunit beta-1 OS=Homo sapiens (Human) GN=CACNB1 PE=2 SV=3	1.2e-114	0.953	0.97	ok			39335	42200			47128	53192	47180	47726
128	G1LD60	G1LD60;D2H546	G1LD60;D2H546	Uncharacterized protein	tr|G1LD60|G1LD60_AILME Uncharacterized protein OS=Ailuropoda melanoleuca (Giant panda) GN=NPEPPS PE=4 SV=1;tr|D2H546|D2H546_AILME Uncharacterized protein OS=Ailuropoda melanoleuca (Giant panda) GN=NPEPPS PE=4 SV=1	NPEPPS	26;26	26;26	26;26	2	26	26	26	41.4	92.484	821	821;833	0	124.68				164	239;292;648;774;1091;1627;1670;2315;2448;3831;4779;5254;5287;5587;5849;6298;7025;7841;8276;8445;8652;9122;9504;9770;10009;10086	True;True;True;True;True;True;True;True;True;True;True;True;True;True;True;True;True;True;True;True;True;True;True;True;True;True	252;310;699;833;1165;1734;1780;2474;2615;4081;5129;5643;5678;6007;6286;6851;7633;8509;8968;9149;9373;9873;10276;10566;10823;10907	13492;13493;21250;21251;21252;21253;21254;21255;21256;21257;21258;21259;21260;21261;21262;21263;21264;21265;21266;21267;21268;21269;21270;21271;21272;21273;21274;21275;21276;21277;43940;43941;43942;43943;43944;43945;43946;43947;43948;43949;43950;43951;43952;43953;43954;43955;43956;43957;43958;43959;43960;43961;43962;43963;43964;43965;43966;43967;43968;43969;43970;43971;43972;43973;50909;50910;509…	23552;23553;36750;36751;36752;36753;36754;36755;36756;36757;36758;36759;36760;36761;36762;36763;36764;36765;36766;36767;36768;36769;36770;36771;36772;36773;36774;36775;36776;36777;36778;76253;76254;76255;76256;76257;76258;76259;76260;76261;76262;76263;76264;76265;76266;76267;76268;76269;76270;76271;76272;76273;76274;76275;76276;76277;76278;76279;76280;76281;76282;76283;76284;76285;76286;87449;874…	23552;36766;76256;87454;120216;199494;203521;278420;290034;455140;585343;653783;663710;702823;742966;800665;875479;954470;1008138;1025100;1060991;1151806;1196769;1234642;1256143;1263088			P55786	PSA_HUMAN	Puromycin-sensitive aminopeptidase OS=Homo sapiens (Human) GN=NPEPPS PE=1 SV=2	0	0.972	0.987	ok	149840	82963	348680	279600	360110	340530	348740	347760	404910	413190	67407
129	D2H547	D2H547;G1LDC2	D2H547;G1LDC2	Putative uncharacterized protein	tr|D2H547|D2H547_AILME Putative uncharacterized protein OS=Ailuropoda melanoleuca (Giant panda) GN=PANDA_004988 PE=4 SV=1;tr|G1LDC2|G1LDC2_AILME Uncharacterized protein OS=Ailuropoda melanoleuca (Giant panda) GN=KPNB1 PE=4 SV=1	---	7;7	7;7	7;7	2	7	7	7	10	93.473	843	843;844	0	29.059				165	2856;4884;4885;8608;8610;9072;9334	True;True;True;True;True;True;True	3047;5240;5241;9326;9328;9822;10102	185078;185079;185080;185081;185082;185083;185084;185085;185086;185087;185088;185089;185090;185091;185092;185093;185094;185095;185096;185097;185098;185099;185100;185101;185102;185103;185104;185105;185106;185107;185108;185109;185110;185111;185112;185113;185114;185115;185116;185117;185118;185119;185120;185121;185122;185123;185124;185125;185126;185127;185128;185129;185130;185131;330232;330233;330234;…	339695;339696;339697;339698;339699;339700;339701;339702;339703;339704;339705;339706;339707;339708;339709;339710;339711;339712;339713;339714;339715;339716;339717;339718;339719;339720;339721;339722;339723;339724;339725;339726;339727;339728;339729;339730;339731;339732;339733;339734;339735;339736;339737;339738;339739;339740;339741;339742;339743;339744;339745;339746;339747;339748;339749;339750;339751;…	339734;594213;594221;1054007;1054034;1144183;1178783			Q14974	IMB1_HUMAN	Importin subunit beta-1 OS=Homo sapiens (Human) GN=KPNB1 PE=1 SV=2	0	0.994	1	ok		29327	24324	36353		50632	19178	18432		18023
130	D2H5C1	D2H5C1;G1L6Y9	D2H5C1;G1L6Y9	Putative uncharacterized protein	tr|D2H5C1|D2H5C1_AILME Putative uncharacterized protein OS=Ailuropoda melanoleuca (Giant panda) GN=PANDA_005082 PE=4 SV=1;tr|G1L6Y9|G1L6Y9_AILME Uncharacterized protein OS=Ailuropoda melanoleuca (Giant panda) GN=CA1 PE=4 SV=1	---	10;10	10;10	10;10	2	10	10	10	58.3	27.646	247	247;261	0	135.78				167	1988;3022;3552;6071;6586;6626;7746;9082;10034;10048	True;True;True;True;True;True;True;True;True;True	2119;3222;3783;6521;7166;7206;8401;9832;10849;10865	126824;126825;126826;126827;126828;126829;126830;126831;126832;126833;126834;126835;126836;126837;126838;126839;126840;126841;126842;126843;126844;126845;126846;126847;126848;126849;126850;126851;126852;126853;126854;126855;126856;126857;126858;126859;126860;126861;126862;126863;126864;126865;126866;126867;126868;126869;126870;192417;192418;192419;192420;192421;192422;192423;192424;192425;192426;…	231172;231173;231174;231175;231176;231177;231178;231179;231180;231181;231182;231183;231184;231185;231186;231187;231188;231189;231190;231191;231192;231193;231194;231195;231196;231197;231198;231199;231200;231201;231202;231203;231204;231205;231206;231207;231208;231209;231210;231211;231212;231213;231214;231215;231216;231217;231218;231219;231220;231221;231222;231223;231224;231225;231226;231227;231228;…	231212;351797;425620;768267;840378;843612;944016;1145484;1257720;1260323			P00915	CAH1_HUMAN	Carbonic anhydrase 1 OS=Homo sapiens (Human) GN=CA1 PE=1 SV=2	4.7e-98	0.827	0.96	ok	1188700	1265400	622070	611840	605870	650270	340750	386250	727880	702420	1357100
131	D2H5C3	D2H5C3;G1L761	D2H5C3;G1L761	Putative uncharacterized protein	tr|D2H5C3|D2H5C3_AILME Putative uncharacterized protein OS=Ailuropoda melanoleuca (Giant panda) GN=PANDA_005084 PE=4 SV=1;tr|G1L761|G1L761_AILME Uncharacterized protein OS=Ailuropoda melanoleuca (Giant panda) GN=CA2 PE=4 SV=1	---	13;13	13;13	13;13	2	13	13	13	65.1	27.998	249	249;261	0	96.4				168	42;894;1899;1900;2211;3024;3172;4862;5354;7180;7424;9081;9767	True;True;True;True;True;True;True;True;True;True;True;True;True	44;963;2024;2025;2359;2360;3224;3379;5215;5751;7796;8055;9831;10563	1993;1994;1995;1996;1997;1998;1999;2000;2001;2002;2003;2004;2005;2006;2007;2008;2009;2010;2011;2012;2013;2014;2015;60390;60391;60392;60393;60394;60395;60396;60397;60398;60399;60400;60401;60402;60403;60404;60405;60406;60407;60408;60409;60410;60411;60412;60413;60414;60415;60416;60417;60418;60419;60420;60421;60422;60423;60424;60425;60426;60427;60428;60429;60430;60431;60432;60433;60434;60435;60436;60…	2933;2934;2935;2936;2937;2938;2939;2940;2941;2942;2943;2944;2945;2946;2947;2948;2949;2950;2951;2952;2953;2954;2955;2956;2957;2958;103728;103729;103730;103731;103732;103733;103734;103735;103736;103737;103738;103739;103740;103741;103742;103743;103744;103745;103746;103747;103748;103749;103750;103751;103752;103753;103754;103755;103756;103757;103758;103759;103760;103761;103762;103763;103764;103765;103…	2941;103767;224491;224505;264209;352094;365307;593073;670595;890516;915641;1145445;1234140	125	211	P00918	CAH2_HUMAN	Carbonic anhydrase 2 OS=Homo sapiens (Human) GN=CA2 PE=1 SV=2	9e-104	0.88	0.968	ok	1492300	1656400	1315400	1279800	963310	1114800	346270	803870	1102900	1030200	1842500
132	D2H5D5	D2H5D5;G1L9R1	D2H5D5;G1L9R1	Putative uncharacterized protein	tr|D2H5D5|D2H5D5_AILME Putative uncharacterized protein OS=Ailuropoda melanoleuca (Giant panda) GN=PANDA_005096 PE=4 SV=1;tr|G1L9R1|G1L9R1_AILME Uncharacterized protein OS=Ailuropoda melanoleuca (Giant panda) GN=CRYZ PE=4 SV=1	---	6;6	6;6	6;6	2	6	6	6	30.4	35.31	329	329;330	0	40.798				169	279;1294;6964;6984;8959;9128	True;True;True;True;True;True	295;1376;7567;7590;9700;9880	15523;15524;15525;15526;15527;15528;15529;15530;15531;15532;15533;15534;15535;15536;15537;15538;15539;15540;15541;15542;15543;15544;15545;15546;15547;15548;15549;15550;15551;15552;15553;15554;15555;15556;15557;15558;15559;15560;15561;15562;15563;15564;15565;80404;476199;477105;477106;477107;477108;477109;477110;477111;477112;477113;477114;477115;477116;477117;477118;477119;477120;477121;477122;47…	26489;26490;26491;26492;26493;26494;26495;26496;26497;26498;26499;26500;26501;26502;26503;26504;26505;26506;26507;26508;26509;26510;26511;26512;26513;26514;26515;26516;26517;26518;26519;26520;26521;26522;26523;26524;26525;26526;26527;26528;26529;26530;26531;26532;26533;26534;26535;26536;137855;870141;871753;871754;871755;871756;871757;871758;871759;871760;871761;871762;871763;871764;871765;871766…	26523;137855;870141;871779;1122074;1152734			Q08257	QOR_HUMAN	Quinone oxidoreductase OS=Homo sapiens (Human) GN=CRYZ PE=1 SV=1	5.5e-174	0.866	0.973	ok	90742	99089	88934	96884	132300	115710	94191	83811	136640	124860
133	D2H5H7	D2H5H7;G1MAN8	D2H5H7;G1MAN8	Putative uncharacterized protein	tr|D2H5H7|D2H5H7_AILME Putative uncharacterized protein OS=Ailuropoda melanoleuca (Giant panda) GN=PANDA_005152 PE=4 SV=1;tr|G1MAN8|G1MAN8_AILME Uncharacterized protein OS=Ailuropoda melanoleuca (Giant panda) GN=PRDX6 PE=4 SV=1	---	20;19	20;19	20;19	2	20	20	20	83.9	24.926	224	224;227	0	305.36				170	1228;1239;1240;1328;1329;1361;1362;2576;3218;4927;5804;6167;6398;6794;8680;8681;9030;9031;9566;9567	True;True;True;True;True;True;True;True;True;True;True;True;True;True;True;True;True;True;True;True	1308;1320;1321;1322;1410;1411;1446;1447;1448;2751;3429;5289;6239;6656;6657;6959;7391;9406;9407;9779;9780;10350;10351	76901;76902;76903;76904;76905;76906;76907;76908;76909;76910;76911;76912;76913;76914;76915;76916;76917;76918;76919;76920;76921;76922;76923;76924;76925;76926;76927;76928;76929;76930;76931;76932;76933;76934;76935;76936;76937;76938;76939;76940;76941;76942;76943;76944;76945;76946;76947;76948;76949;76950;76951;76952;76953;76954;76955;76956;76957;76958;76959;76960;76961;76962;76963;76964;77395;77396;773…	132706;132707;132708;132709;132710;132711;132712;132713;132714;132715;132716;132717;132718;132719;132720;132721;132722;132723;132724;132725;132726;132727;132728;132729;132730;132731;132732;132733;132734;132735;132736;132737;132738;132739;132740;132741;132742;132743;132744;132745;132746;132747;132748;132749;132750;132751;132752;132753;132754;132755;132756;132757;132758;132759;132760;132761;132762;…	132753;133573;133580;142400;142516;146054;146116;312502;369354;597075;732681;782757;813149;855046;1070257;1070267;1139892;1139946;1208939;1209006	126;127;128	68;116;188	P30041	PRDX6_HUMAN	Peroxiredoxin-6 OS=Homo sapiens (Human) GN=PRDX6 PE=1 SV=3	7.4e-113	0.942	0.982	ok	1677300	1697100	2060000	2181800	1938400	2111800	1505100	1341600	1745600	1736900	1924900
134	D2H5I3	D2H5I3;G1MAY6	D2H5I3;G1MAY6;CON__P41361	Putative uncharacterized protein	tr|D2H5I3|D2H5I3_AILME Putative uncharacterized protein OS=Ailuropoda melanoleuca (Giant panda) GN=PANDA_005159 PE=3 SV=1;tr|G1MAY6|G1MAY6_AILME Uncharacterized protein OS=Ailuropoda melanoleuca (Giant panda) GN=SERPINC1 PE=3 SV=1	---	15;15;6	15;15;6	15;15;6	3	15	15	15	38.2	51.085	450	450;465;465	0	28.653				171	249;590;2246;2497;2748;3878;5628;5728;5729;6370;7082;7488;8456;8625;8626	True;True;True;True;True;True;True;True;True;True;True;True;True;True;True	262;636;2399;2667;2931;4134;6050;6160;6161;6928;7691;8126;9161;9343;9344	13940;40957;40958;40959;40960;40961;40962;40963;40964;40965;40966;40967;40968;40969;40970;40971;40972;40973;40974;40975;40976;40977;40978;40979;40980;146998;146999;147000;147001;147002;147003;147004;147005;147006;147007;147008;147009;147010;147011;147012;147013;147014;147015;147016;161131;161132;161133;177270;177271;253392;253393;253394;385359;385360;385361;385362;385363;385364;385365;385366;3853…	24144;71613;71614;71615;71616;71617;71618;71619;71620;71621;71622;71623;71624;71625;71626;71627;71628;71629;71630;71631;71632;71633;71634;71635;71636;269419;269420;269421;269422;269423;269424;269425;269426;269427;269428;269429;269430;269431;269432;269433;269434;269435;269436;269437;269438;269439;295780;295781;295782;326289;326290;461636;461637;461638;705292;705293;705294;705295;705296;705297;7052…	24144;71616;269422;295781;326289;461636;705292;722042;722044;811507;883594;920365;1026359;1057028;1057030			P01008	ANT3_HUMAN	Antithrombin-III OS=Homo sapiens (Human) GN=SERPINC1 PE=1 SV=1	2.1e-176	0.889	0.967	not checked	523950	701660	26833	122250	83701	31627	70008	98570		882110	574740
135	D2H5L1	D2H5L1	D2H5L1	Uncharacterized protein	tr|D2H5L1|D2H5L1_AILME Uncharacterized protein OS=Ailuropoda melanoleuca (Giant panda) GN=PGAM4 PE=3 SV=1	PGAM4	8	3	3	1	8	3	3	33.9	28.852	254	254	0	9.4174				172	503;551;2739;3748;4533;7407;9132;9771	True;False;True;False;False;False;False;True	541;592;593;2922;3995;4849;8038;9884;10567	34838;34839;34840;34841;34842;34843;34844;34845;34846;34847;34848;34849;34850;34851;34852;34853;34854;34855;34856;34857;34858;34859;34860;34861;34862;34863;34864;34865;34866;34867;34868;34869;34870;34871;34872;34873;34874;34875;34876;34877;34878;34879;34880;34881;34882;34883;34884;34885;34886;34887;34888;34889;34890;34891;34892;34893;34894;34895;38389;38390;38391;38392;38393;38394;38395;38396;383…	60430;60431;60432;60433;60434;60435;60436;60437;60438;60439;60440;60441;60442;60443;60444;60445;60446;60447;60448;60449;60450;60451;60452;60453;60454;60455;60456;60457;60458;60459;60460;60461;60462;60463;60464;60465;60466;60467;60468;60469;60470;60471;60472;60473;60474;60475;60476;60477;60478;60479;60480;60481;60482;60483;60484;60485;60486;60487;60488;60489;60490;60491;60492;60493;67083;67084;670…	60472;67198;326075;445137;555238;914103;1153445;1234662	129	243	P18669	PGAM1_HUMAN	Phosphoglycerate mutase 1 OS=Homo sapiens (Human) GN=PGAM1 PE=1 SV=2	3.6e-112	0.992	1	ok	38699	48352	39695	41152	67741	70802	44888		76958	70480	44837
136	D2H5Q1	D2H5Q1;G1M795;G1M771	D2H5Q1;G1M795;G1M771	Putative uncharacterized protein	tr|D2H5Q1|D2H5Q1_AILME Putative uncharacterized protein OS=Ailuropoda melanoleuca (Giant panda) GN=PANDA_005239 PE=4 SV=1;tr|G1M795|G1M795_AILME Uncharacterized protein OS=Ailuropoda melanoleuca (Giant panda) GN=ACTN1 PE=4 SV=1;tr|G1M771|G1M771_AILME Unc	---	29;28;15	8;7;6	3;3;3	3	29	8	3	27.8	104.82	910	910;830;672	0	83.338				173	334;335;434;493;720;1403;1917;2311;2447;3502;3503;3553;3717;4520;4521;4644;4814;4943;5078;5548;6025;6265;7279;7391;8160;8161;8271;8825;8957	False;True;False;True;False;False;False;True;False;False;False;False;False;False;True;False;False;True;False;False;False;False;True;False;False;False;False;True;True	358;359;470;531;776;1490;2045;2470;2614;3731;3732;3784;3961;3962;4832;4833;4966;5165;5310;5454;5957;5958;6475;6805;7898;8019;8844;8845;8963;9561;9698	24774;24775;24776;24777;24778;24779;24780;24781;24782;24783;24784;24785;24786;24787;24788;24789;24790;24791;24792;24793;24794;24795;24796;24797;24798;24799;24800;24801;24802;24803;24804;24805;24806;24807;24808;24809;24810;24811;24812;24813;24814;24815;24816;24817;24818;24819;24820;24821;24822;24823;24824;24825;24826;24827;24828;24829;24830;24831;24832;24833;24834;24835;24836;24837;24838;24839;248…	44079;44080;44081;44082;44083;44084;44085;44086;44087;44088;44089;44090;44091;44092;44093;44094;44095;44096;44097;44098;44099;44100;44101;44102;44103;44104;44105;44106;44107;44108;44109;44110;44111;44112;44113;44114;44115;44116;44117;44118;44119;44120;44121;44122;44123;44124;44125;44126;44127;44128;44129;44130;44131;44132;44133;44134;44135;44136;44137;44138;44139;44140;44141;44142;44143;44144;441…				P12814	ACTN1_HUMAN	Alpha-actinin-1 OS=Homo sapiens (Human) GN=ACTN1 PE=1 SV=2	0	0.944	0.961	ok	135020	143090	333090	304850	299200	331010	297250	314690	264910	250210	190700
137	D2H5R7	D2H5R7	D2H5R7	Ferritin	tr|D2H5R7|D2H5R7_AILME Ferritin OS=Ailuropoda melanoleuca (Giant panda) GN=LOC100473868 PE=3 SV=1	LOC100473868	9	3	3	1	9	3	3	61.2	21.305	183	183	0	21.601				174	2083;2084;3945;4955;7029;7117;7990;8501;9861	False;False;False;False;True;True;False;True;False	2221;2222;4206;5322;7637;7729;8666;9208;10668	137234;137235;137236;137237;137238;137239;137240;137241;137242;137243;257302;257303;257304;257305;257306;257307;257308;257309;257310;257311;257312;257313;257314;257315;257316;257317;257318;257319;257320;257321;257322;257323;257324;257325;257326;257327;257328;336321;336322;336323;336324;336325;336326;336327;336328;336329;336330;336331;336332;336333;336334;336335;336336;336337;336338;336339;336340;…	252746;252747;252748;252749;252750;252751;252752;252753;252754;252755;469347;469348;469349;469350;469351;469352;469353;469354;469355;469356;469357;469358;469359;469360;469361;469362;469363;469364;469365;469366;469367;469368;469369;469370;469371;469372;469373;469374;469375;469376;469377;469378;469379;469380;606367;606368;606369;606370;606371;606372;606373;606374;606375;606376;606377;606378;606379;…	252747;252750;469374;606387;875660;885399;966218;1030689;1243335			P02794	FRIH_HUMAN	Ferritin heavy chain OS=Homo sapiens (Human) GN=FTH1 PE=1 SV=2	4e-82	0.945	0.984	ok		131150	146770	150010				115160			134610
138	D2H5R9	D2H5R9;G1LY63	D2H5R9;G1LY63	Putative uncharacterized protein	tr|D2H5R9|D2H5R9_AILME Putative uncharacterized protein OS=Ailuropoda melanoleuca (Giant panda) GN=PANDA_005258 PE=4 SV=1;tr|G1LY63|G1LY63_AILME Uncharacterized protein OS=Ailuropoda melanoleuca (Giant panda) GN=PREP PE=4 SV=1	---	4;4	4;4	4;4	2	4	4	4	7.6	75.799	669	669;712	0.0014184	4.9305				175	262;7476;7801;8866	True;True;True;True	276;8114;8465;9604	14384;506960;524755;612345;612346;612347;612348	24733;919865;950627;1111559;1111560;1111561;1111562	24733;919865;950627;1111561			P48147	PPCE_HUMAN	Prolyl endopeptidase OS=Homo sapiens (Human) GN=PREP PE=1 SV=2	0	0.973	0.994	ok
139	D2H5W1	D2H5W1;G1LBD8	D2H5W1;G1LBD8	Putative uncharacterized protein	tr|D2H5W1|D2H5W1_AILME Putative uncharacterized protein OS=Ailuropoda melanoleuca (Giant panda) GN=PANDA_005314 PE=4 SV=1;tr|G1LBD8|G1LBD8_AILME Uncharacterized protein OS=Ailuropoda melanoleuca (Giant panda) GN=NIT2 PE=4 SV=1	---	5;5	5;5	5;5	2	5	5	5	25.5	30.381	275	275;282	0	33.239				176	838;2440;4468;4921;6067	True;True;True;True;True	904;2606;4775;5281;6517	54322;54323;54324;54325;54326;54327;54328;54329;54330;54331;54332;54333;54334;54335;54336;54337;54338;54339;54340;54341;54342;54343;54344;54345;54346;54347;54348;54349;54350;54351;54352;54353;54354;54355;54356;157376;157377;157378;157379;157380;157381;157382;157383;157384;157385;157386;157387;157388;157389;296917;296918;296919;296920;296921;296922;296923;296924;331249;331250;331251;331252;331253;…	92330;92331;92332;92333;92334;92335;92336;92337;92338;92339;92340;92341;92342;92343;92344;92345;92346;92347;92348;92349;92350;92351;92352;92353;92354;92355;92356;92357;92358;92359;92360;92361;92362;92363;92364;288424;288425;288426;288427;288428;288429;288430;288431;288432;288433;288434;288435;288436;288437;540482;540483;540484;540485;540486;540487;540488;540489;595401;595402;595403;595404;595405;…	92333;288428;540486;595402;768237			Q9NQR4	NIT2_HUMAN	Omega-amidase NIT2 OS=Homo sapiens (Human) GN=NIT2 PE=1 SV=1	1.5e-127	0.902	0.985	not checked			99615	71779	120310	115530		61535	103850	113960
140	D2H6D1	D2H6D1	D2H6D1	Uncharacterized protein	tr|D2H6D1|D2H6D1_AILME Uncharacterized protein OS=Ailuropoda melanoleuca (Giant panda) GN=CPT1B PE=3 SV=1	CPT1B	11	11	11	1	11	11	11	16.7	88.003	772	772	0	25.478				177	46;146;2280;2758;4122;5843;6901;7580;8482;9625;9964	True;True;True;True;True;True;True;True;True;True;True	48;156;2436;2943;4393;6280;7500;8225;9188;10414;10775	2081;2082;2083;2084;2085;8770;8771;8772;8773;8774;8775;8776;8777;8778;8779;8780;8781;8782;8783;8784;149646;178160;178161;178162;178163;178164;178165;178166;178167;178168;178169;273597;273598;402838;402839;402840;402841;402842;402843;402844;402845;402846;402847;402848;402849;402850;402851;402852;402853;402854;402855;402856;402857;471992;471993;471994;471995;471996;471997;471998;471999;472000;47200…	3069;3070;3071;3072;3073;15538;15539;15540;15541;15542;15543;15544;15545;15546;15547;15548;15549;15550;15551;15552;15553;275471;327751;327752;327753;327754;327755;327756;327757;327758;327759;327760;498777;498778;736095;736096;736097;736098;736099;736100;736101;736102;736103;736104;736105;736106;736107;736108;736109;736110;736111;736112;736113;736114;863447;863448;863449;863450;863451;863452;86345…	3071;15547;275471;327757;498778;736106;863458;930396;1029163;1214854;1251670			Q92523	CPT1B_HUMAN	Carnitine O-palmitoyltransferase 1, muscle isoform OS=Homo sapiens (Human) GN=CPT1B PE=1 SV=2	0	0.908	0.977	ok	136610	129090	148120	118050	48323	18442	116840	72115	72935	49262	70244
141	D2H6L9	D2H6L9;G1LBN8	D2H6L9;G1LBN8	Putative uncharacterized protein	tr|D2H6L9|D2H6L9_AILME Putative uncharacterized protein OS=Ailuropoda melanoleuca (Giant panda) GN=PANDA_005634 PE=3 SV=1;tr|G1LBN8|G1LBN8_AILME Uncharacterized protein OS=Ailuropoda melanoleuca (Giant panda) GN=YWHAB PE=3 SV=1	---	8;8	4;4	4;4	2	8	4	4	37.6	27.951	245	245;246	0	20.117				178	903;1574;2170;6523;8051;9798;9966;9979	True;False;False;False;True;False;True;True	972;1678;1679;2316;7088;8730;10597;10598;10777;10790	60719;60720;60721;60722;60723;60724;60725;60726;60727;60728;60729;60730;60731;60732;60733;60734;60735;60736;60737;60738;60739;60740;60741;60742;104181;104182;104183;104184;104185;104186;104187;104188;104189;104190;104191;104192;104193;104194;104195;104196;104197;104198;104199;104200;104201;104202;104203;104204;104205;104206;104207;104208;104209;104210;104211;104212;104213;104214;104215;104216;104…	104164;104165;104166;104167;104168;104169;104170;104171;104172;104173;104174;104175;104176;104177;104178;104179;104180;104181;104182;104183;104184;104185;104186;104187;189938;189939;189940;189941;189942;189943;189944;189945;189946;189947;189948;189949;189950;189951;189952;189953;189954;189955;189956;189957;189958;189959;189960;189961;189962;189963;189964;189965;189966;189967;189968;189969;189970;…	104175;190161;260448;826189;983684;1237916;1251691;1252192	30	219	P31946	1433B_HUMAN	14-3-3 protein beta/alpha OS=Homo sapiens (Human) GN=YWHAB PE=1 SV=3	2.9e-122	1	1	ok			55974	56461	81294	72843			83808	65950
142	D2H6P0	D2H6P0;G1LRG2	D2H6P0;G1LRG2;G1LS78	Putative uncharacterized protein	tr|D2H6P0|D2H6P0_AILME Putative uncharacterized protein OS=Ailuropoda melanoleuca (Giant panda) GN=PANDA_005659 PE=4 SV=1;tr|G1LRG2|G1LRG2_AILME Uncharacterized protein OS=Ailuropoda melanoleuca (Giant panda) GN=RDX PE=4 SV=1	---	12;12;5	12;12;5	6;6;0	3	12	12	6	25	68.095	579	579;583;579	0	14.855				179	231;601;1732;2529;2808;3778;3977;4113;5170;6613;7065;7084	True;True;True;True;True;True;True;True;True;True;True;True	244;647;1844;2701;2995;4025;4240;4382;5554;7193;7674;7693	12988;12989;12990;12991;12992;12993;12994;12995;12996;12997;12998;12999;13000;13001;13002;13003;13004;13005;13006;13007;13008;13009;13010;13011;13012;13013;13014;13015;13016;13017;13018;13019;13020;13021;13022;13023;41792;41793;41794;41795;114222;114223;114224;114225;114226;114227;114228;166196;166197;166198;182219;182220;182221;182222;182223;182224;182225;182226;246327;246328;246329;246330;24633…	22333;22334;22335;22336;22337;22338;22339;22340;22341;22342;22343;22344;22345;22346;22347;22348;22349;22350;22351;22352;22353;22354;22355;22356;22357;22358;22359;22360;22361;22362;22363;22364;22365;22366;22367;22368;22369;73275;73276;73277;73278;209613;209614;209615;209616;209617;209618;209619;307572;307573;307574;307575;307576;307577;334594;334595;334596;334597;334598;334599;334600;334601;450219…	22352;73278;209614;307572;334597;450219;475984;496875;645598;843114;881108;883600			P35241	RADI_HUMAN	Radixin OS=Homo sapiens (Human) GN=RDX PE=1 SV=1	1e-91	0.993	1	OK		44605	119590	140820	113540	102260	136550	107320	108490	126280	49210
143	D2H6U4	D2H6U4	D2H6U4	Uncharacterized protein	tr|D2H6U4|D2H6U4_AILME Uncharacterized protein OS=Ailuropoda melanoleuca (Giant panda) GN=CAB39 PE=4 SV=1	CAB39	4	4	4	1	4	4	4	10.3	39.871	341	341	0	7.1145				180	5325;5462;6469;8886	True;True;True;True	5721;5863;7033;9624	363466;363467;363468;363469;372976;372977;372978;372979;372980;372981;372982;372983;372984;446466;446467;613236	667905;667906;667907;667908;684055;684056;684057;684058;684059;684060;684061;684062;684063;816803;816804;1113039	667908;684057;816803;1113039			Q9Y376	CAB39_HUMAN	Calcium-binding protein 39 OS=Homo sapiens (Human) GN=CAB39 PE=1 SV=1	3.7e-143	0.994	1	ok				22187	28504	27944				28364
144	G1L505	G1L505;D2H737;G1L4Y3	G1L505;D2H737;G1L4Y3;D2HI99;G1LQM4	Uncharacterized protein	tr|G1L505|G1L505_AILME Uncharacterized protein OS=Ailuropoda melanoleuca (Giant panda) GN=FBN1 PE=4 SV=1;tr|D2H737|D2H737_AILME Putative uncharacterized protein OS=Ailuropoda melanoleuca (Giant panda) GN=PANDA_005925 PE=4 SV=1;tr|G1L4Y3|G1L4Y3_AILME Unch	FBN1	27;27;27;2;2	27;27;27;2;2	24;24;24;0;0	5	27	27	24	11.4	300.19	2773	2773;2869;2871;2804;3461	0	60.287				181	974;975;1011;1032;1053;1062;1082;2934;2969;2979;3284;3384;3485;3508;4349;5148;6515;6690;6783;6807;7294;7605;7848;8176;8240;8351;9818	True;True;True;True;True;True;True;True;True;True;True;True;True;True;True;True;True;True;True;True;True;True;True;True;True;True;True	1043;1044;1081;1102;1126;1135;1155;3129;3166;3176;3501;3606;3714;3737;4646;5529;7080;7278;7378;7405;7916;8252;8516;8861;8928;9048;10623	63719;63720;63721;63722;63723;63724;63725;65206;65207;65964;65965;65966;68057;68237;68238;69368;188750;188751;190622;190623;190624;190625;190626;190627;190850;190851;190852;190853;190854;190855;190856;190857;190858;190859;206263;206264;206265;206266;206267;206268;206269;206270;206271;214571;214572;214573;214574;222681;222682;222683;222684;222685;222686;222687;224130;224131;224132;224133;224134;22…	108426;108427;108428;108429;108430;108431;108432;111235;111236;112690;112691;112692;117800;118003;118004;119569;345540;345541;348207;348208;348209;348210;348211;348212;348777;348778;348779;348780;348781;348782;348783;348784;348785;348786;348787;348788;348789;373639;373640;373641;373642;373643;373644;373645;373646;373647;390213;390214;390215;390216;406468;406469;406470;406471;406472;406473;406474;…	108428;108432;111236;112690;117800;118003;119569;345541;348207;348782;373643;390214;406473;408889;527325;643400;825742;849157;854764;855641;901669;932278;954897;998071;1003553;1015615;1240057			P35555	FBN1_HUMAN	Fibrillin-1 OS=Homo sapiens (Human) GN=FBN1 PE=1 SV=3	0	0.969	0.987	ok	222070	161150			122450	75579
145	D2H766	D2H766;G1LLJ5	D2H766;G1LLJ5	Putative uncharacterized protein	tr|D2H766|D2H766_AILME Putative uncharacterized protein OS=Ailuropoda melanoleuca (Giant panda) GN=PANDA_005960 PE=4 SV=1;tr|G1LLJ5|G1LLJ5_AILME Uncharacterized protein OS=Ailuropoda melanoleuca (Giant panda) GN=NDUFV2 PE=4 SV=1	---	8;8	8;8	8;8	2	8	8	8	45.5	23.113	209	209;247	0	69.411				182	13;1309;1600;1601;2731;6641;6642;9645	True;True;True;True;True;True;True;True	14;1391;1706;1707;2914;7222;7223;10434	444;445;446;447;448;449;450;451;452;453;454;455;456;457;458;459;460;461;462;463;464;465;466;467;468;469;470;471;472;473;474;475;476;477;478;479;480;481;482;483;484;485;486;487;488;489;490;491;492;493;494;495;496;497;498;499;500;501;502;503;504;505;506;507;508;509;510;511;512;513;514;515;516;517;518;519;520;521;522;523;524;525;526;527;528;529;530;531;532;81981;81982;81983;81984;81985;81986;81987;8…	556;557;558;559;560;561;562;563;564;565;566;567;568;569;570;571;572;573;574;575;576;577;578;579;580;581;582;583;584;585;586;587;588;589;590;591;592;593;594;595;596;597;598;599;600;601;602;603;604;605;606;607;608;609;610;611;612;613;614;615;616;617;618;619;620;621;622;623;624;625;626;627;628;629;630;631;632;633;634;635;636;637;638;639;640;641;642;643;644;645;646;647;648;649;650;651;652;653;654;655…	643;141417;194247;194306;325591;845527;845590;1216499			P19404	NDUV2_HUMAN	NADH dehydrogenase [ubiquinone] flavoprotein 2, mitochondrial OS=Homo sapiens (Human) GN=NDUFV2 PE=1 SV=2	3.9e-90	0.99	0.995	not checked	406850	317710	490760	528130	593960	593030	370520	331810	616260	524000	525300
146	D2H7H6	D2H7H6;G1M967	D2H7H6;G1M967	Putative uncharacterized protein	tr|D2H7H6|D2H7H6_AILME Putative uncharacterized protein OS=Ailuropoda melanoleuca (Giant panda) GN=PANDA_006098 PE=3 SV=1;tr|G1M967|G1M967_AILME Uncharacterized protein OS=Ailuropoda melanoleuca (Giant panda) GN=PGM1 PE=3 SV=1	---	41;41	41;41	41;41	2	41	41	41	85	63.577	581	581;596	0	323.31				184	367;1269;1368;1735;2109;2526;2613;2678;2679;3582;3751;3783;3825;3843;4121;4321;4500;4789;4790;5329;5800;5809;5983;6059;6060;6456;6933;6978;7143;7189;7190;7785;8067;8181;8182;8247;8430;8757;8876;9424;9814	True;True;True;True;True;True;True;True;True;True;True;True;True;True;True;True;True;True;True;True;True;True;True;True;True;True;True;True;True;True;True;True;True;True;True;True;True;True;True;True;True	394;1351;1455;1849;2248;2697;2698;2789;2790;2859;2860;3813;3998;4030;4074;4075;4093;4392;4615;4809;4810;5139;5140;5725;6235;6244;6433;6509;6510;7020;7534;7584;7756;7805;7806;8442;8443;8748;8866;8867;8868;8935;9133;9491;9614;10194;10619	27025;27026;27027;27028;27029;27030;27031;27032;27033;27034;27035;27036;27037;27038;27039;27040;27041;27042;27043;27044;27045;27046;27047;27048;27049;27050;27051;27052;27053;27054;27055;27056;27057;27058;27059;27060;27061;27062;27063;27064;27065;27066;27067;27068;27069;27070;27071;27072;27073;27074;27075;27076;27077;27078;27079;27080;27081;27082;27083;27084;27085;27086;27087;27088;27089;27090;270…	47800;47801;47802;47803;47804;47805;47806;47807;47808;47809;47810;47811;47812;47813;47814;47815;47816;47817;47818;47819;47820;47821;47822;47823;47824;47825;47826;47827;47828;47829;47830;47831;47832;47833;47834;47835;47836;47837;47838;47839;47840;47841;47842;47843;47844;47845;47846;47847;47848;47849;47850;47851;47852;47853;47854;47855;47856;47857;47858;47859;47860;47861;47862;47863;47864;47865;478…				P36871	PGM1_HUMAN	Phosphoglucomutase-1 OS=Homo sapiens (Human) GN=PGM1 PE=1 SV=3	0	0.972	0.993	OK	6421600	6604100	6910100	7089500	6877900	7016300	8807100	8779900	7870500	8273800	7319700
147	D2H7K3	D2H7K3	D2H7K3	Putative uncharacterized protein	tr|D2H7K3|D2H7K3_AILME Putative uncharacterized protein OS=Ailuropoda melanoleuca (Giant panda) GN=PANDA_006133 PE=4 SV=1	---	8	1	1	1	8	1	1	10.1	111.26	984	984	0.0091265	3.6946				185	2812;3528;3842;4105;5481;6633;6811;8885	False;False;False;False;False;False;True;False	3000;3759;4092;4374;5882;7214;7409;9623	182593;182594;182595;182596;182597;182598;182599;182600;182601;182602;182603;182604;182605;182606;182607;182608;182609;182610;182611;182612;182613;182614;182615;182616;229416;249890;249891;272287;272288;272289;272290;272291;272292;272293;272294;272295;272296;272297;272298;272299;272300;272301;272302;272303;272304;272305;272306;272307;272308;272309;272310;272311;272312;272313;272314;272315;272316;…	335185;335186;335187;335188;335189;335190;335191;335192;335193;335194;335195;335196;335197;335198;335199;335200;335201;335202;335203;335204;335205;335206;335207;335208;419179;455685;455686;496471;496472;496473;496474;496475;496476;496477;496478;496479;496480;496481;496482;496483;496484;496485;496486;496487;496488;496489;496490;496491;496492;496493;496494;496495;496496;496497;496498;496499;496500;…	335195;419179;455685;496482;687075;844544;855929;1113037			P54289	CA2D1_HUMAN	Voltage-dependent calcium channel subunit alpha-2/delta-1 OS=Homo sapiens (Human) GN=CACNA2D1 PE=1 SV=3	0	0.962	0.981	not checked			18848	21233			20223	23093	25153	26528
148	D2H7T2	D2H7T2;G1M383	D2H7T2;G1M383	Putative uncharacterized protein	tr|D2H7T2|D2H7T2_AILME Putative uncharacterized protein OS=Ailuropoda melanoleuca (Giant panda) GN=PANDA_006236 PE=4 SV=1;tr|G1M383|G1M383_AILME Uncharacterized protein OS=Ailuropoda melanoleuca (Giant panda) GN=MYBPC2 PE=4 SV=1	---	56;56	55;55	55;55	2	56	55	55	56	123.81	1101	1101;1141	0	323.31				186	316;401;718;879;983;985;1069;1070;1150;1286;1463;2014;2121;2222;2408;2654;2655;2997;3771;4014;4397;4559;4678;4698;4765;5048;5049;5573;5575;5982;6034;6790;6842;6845;6863;7064;7199;7364;7469;7494;7544;7591;8194;8373;8455;8460;9514;9524;9525;9546;9557;9619;9656;9712;9801;10100	True;True;True;True;True;True;True;True;True;True;True;True;True;True;True;True;True;True;False;True;True;True;True;True;True;True;True;True;True;True;True;True;True;True;True;True;True;True;True;True;True;True;True;True;True;True;True;True;True;True;True;True;True;True;True;True	339;340;435;774;947;1052;1054;1142;1143;1225;1368;1564;2146;2261;2373;2571;2832;2833;3196;4018;4278;4699;4875;5005;5034;5114;5421;5422;5992;5994;6432;6484;7386;7387;7441;7444;7462;7673;7815;7990;8107;8132;8186;8236;8880;9070;9071;9160;9166;10290;10300;10301;10322;10338;10408;10445;10505;10601;10922	23862;23863;23864;23865;23866;23867;23868;23869;23870;23871;23872;23873;23874;23875;23876;23877;23878;23879;23880;23881;23882;23883;23884;23885;23886;23887;23888;23889;23890;23891;23892;23893;23894;23895;23896;23897;23898;23899;23900;23901;23902;23903;23904;23905;23906;23907;23908;23909;23910;23911;23912;23913;23914;23915;23916;23917;23918;23919;23920;23921;23922;23923;30093;30094;30095;30096;300…	42848;42849;42850;42851;42852;42853;42854;42855;42856;42857;42858;42859;42860;42861;42862;42863;42864;42865;42866;42867;42868;42869;42870;42871;42872;42873;42874;42875;42876;42877;42878;42879;42880;42881;42882;42883;42884;42885;42886;42887;42888;42889;42890;42891;42892;42893;42894;42895;42896;42897;42898;42899;42900;42901;42902;42903;42904;42905;42906;42907;42908;42909;42910;42911;42912;42913;429…				Q14324	MYPC2_HUMAN	Myosin-binding protein C, fast-type OS=Homo sapiens (Human) GN=MYBPC2 PE=1 SV=2	0	0.907	0.972	not checked	6439800	6777000	6150400	6317300	5485200	4048600	9217400	9004800	10467000	9845800	5972000
149	D2H7W8	D2H7W8;G1M730	D2H7W8;G1M730	Putative uncharacterized protein	tr|D2H7W8|D2H7W8_AILME Putative uncharacterized protein OS=Ailuropoda melanoleuca (Giant panda) GN=PANDA_006286 PE=4 SV=1;tr|G1M730|G1M730_AILME Uncharacterized protein OS=Ailuropoda melanoleuca (Giant panda) GN=HRC PE=4 SV=1	---	2;2	2;2	2;2	2	2	2	2	4.3	71.232	627	627;698	0.0091027	3.6499				187	2741;7459	True;True	2924;8096	177197;177198;177199;177200;177201;177202;177203;177204;177205;506171;506172	326141;326142;326143;326144;326145;326146;326147;326148;326149;918783;918784	326143;918783			P23327	SRCH_HUMAN	Sarcoplasmic reticulum histidine-rich calcium-binding protein OS=Homo sapiens (Human) GN=HRC PE=1 SV=1	8.3e-70	0.639	0.767	not checked				18350			27360
150	D2H7X7	D2H7X7	D2H7X7;D2I1F2;G1MCP9	Uncharacterized protein	tr|D2H7X7|D2H7X7_AILME Uncharacterized protein OS=Ailuropoda melanoleuca (Giant panda) GN=GYS1 PE=4 SV=1	GYS1	19;1;1	19;1;1	19;1;1	3	19	19	19	34.2	83.754	737	737;703;705	0	155.89				188	5;2729;2834;4749;4785;5653;5778;6776;7098;7333;7696;8369;8392;8441;8914;8990;9471;9951;9952	True;True;True;True;True;True;True;True;True;True;True;True;True;True;True;True;True;True;True	6;2912;3024;5088;5135;6079;6212;7371;7707;7956;8349;9066;9091;9145;9654;9732;10242;10760;10761	169;170;171;172;173;174;175;176;177;178;179;180;181;182;183;184;185;186;187;188;189;190;191;192;193;194;195;196;197;198;199;200;201;202;203;204;205;206;207;208;209;210;211;212;213;214;215;216;217;218;219;220;221;222;223;224;225;226;227;228;229;230;231;232;233;234;235;236;237;238;239;240;241;242;243;244;245;246;247;248;249;250;251;252;253;254;255;256;257;258;259;260;261;262;263;176777;176778;18409…	235;236;237;238;239;240;241;242;243;244;245;246;247;248;249;250;251;252;253;254;255;256;257;258;259;260;261;262;263;264;265;266;267;268;269;270;271;272;273;274;275;276;277;278;279;280;281;282;283;284;285;286;287;288;289;290;291;292;293;294;295;296;297;298;299;300;301;302;303;304;305;306;307;308;309;310;311;312;313;314;315;316;317;318;319;320;321;322;323;324;325;326;327;328;329;330;331;332;333;334…	279;325477;338409;582184;585722;707015;729756;854677;884449;907269;940159;1016701;1018939;1024957;1116182;1123846;1194338;1250665;1250674			P13807	GYS1_HUMAN	Glycogen [starch] synthase, muscle OS=Homo sapiens (Human) GN=GYS1 PE=1 SV=2	0	0.972	0.993	ok	528000	453300	664530	705470	527310	554080	780350	695280	744760	776280	512610
151	D2H7X8	D2H7X8	D2H7X8;D2HX70	Ferritin	tr|D2H7X8|D2H7X8_AILME Ferritin OS=Ailuropoda melanoleuca (Giant panda) GN=LOC100476634 PE=2 SV=1	LOC100476634	5;1	5;1	5;1	2	5	5	5	40	19.9	175	175;173	0	26.582				189	2906;4906;6005;7119;7756	True;True;True;True;True	3098;5266;6455;7732;8411	187536;187537;330882;330883;330884;330885;416120;416121;485465;521604;521605;521606;521607;521608;521609;521610;521611;521612	343667;343668;594973;594974;594975;594976;594977;594978;594979;762030;762031;885620;944584;944585;944586;944587;944588;944589;944590;944591;944592;944593;944594	343668;594979;762031;885620;944592			P02792	FRIL_HUMAN	Ferritin light chain OS=Homo sapiens (Human) GN=FTL PE=1 SV=2	6.4e-69	0.863	0.971	ok
152	D2H814	D2H814	D2H814	Uncharacterized protein	tr|D2H814|D2H814_AILME Uncharacterized protein OS=Ailuropoda melanoleuca (Giant panda) GN=EHD2 PE=4 SV=1	EHD2	21	21	20	1	21	21	20	48.6	61.189	543	543	0	123.91				191	1270;1334;2536;2664;3303;3495;4295;4730;5114;5166;5444;5504;5594;5641;5654;7684;8469;9576;9647;9651;9652	True;True;True;True;True;True;True;True;True;True;True;True;True;True;True;True;True;True;True;True;True	1352;1416;2708;2842;3522;3724;4586;5069;5493;5549;5845;5907;6014;6065;6080;8335;9175;10360;10436;10440;10441	79477;83016;83017;83018;83019;83020;83021;83022;83023;83024;83025;83026;83027;83028;83029;83030;83031;83032;166856;166857;166858;166859;166860;174015;174016;174017;174018;174019;174020;174021;174022;174023;174024;174025;174026;174027;174028;174029;174030;174031;208719;208720;208721;208722;208723;208724;208725;223014;223015;223016;223017;223018;223019;223020;223021;223022;223023;223024;223025;2230…	136619;143191;143192;143193;143194;143195;143196;143197;143198;143199;143200;143201;143202;143203;143204;143205;143206;143207;143208;309160;309161;309162;309163;309164;320901;320902;320903;320904;320905;320906;320907;320908;320909;320910;320911;320912;320913;320914;320915;320916;320917;320918;378180;378181;378182;378183;378184;378185;378186;407015;407016;407017;407018;407019;407020;407021;407022;…	136619;143208;309162;320913;378182;407026;519646;577930;639881;645449;681385;689067;702965;706344;707060;939274;1027515;1209656;1216512;1216797;1216848			Q9NZN4	EHD2_HUMAN	EH domain-containing protein 2 OS=Homo sapiens (Human) GN=EHD2 PE=1 SV=2	0	0.991	1	ok	134920	68168	200360	228650	251810	236790	255270	233520	255290	236020	22269
153	D2H883	D2H883;G1M6S8	D2H883;G1M6S8	Putative uncharacterized protein	tr|D2H883|D2H883_AILME Putative uncharacterized protein OS=Ailuropoda melanoleuca (Giant panda) GN=PANDA_006422 PE=4 SV=1;tr|G1M6S8|G1M6S8_AILME Uncharacterized protein OS=Ailuropoda melanoleuca (Giant panda) GN=MYO1B PE=4 SV=1	---	3;3	3;3	3;3	2	3	3	3	3.3	131.89	1136	1136;1138	0.0090206	3.5777				192	5374;7864;9430	True;True;True	5773;8532;10200	367283;528315;528316;655805	675278;956023;956024;956025;1190682	675278;956023;1190682			O43795	MYO1B_HUMAN	Unconventional myosin-Ib OS=Homo sapiens (Human) GN=MYO1B PE=1 SV=3	0	0.984	0.995	ok											78617
154	D2H8C2	D2H8C2;G1LMP2	D2H8C2;G1LMP2;CON__P28800	Putative uncharacterized protein	tr|D2H8C2|D2H8C2_AILME Putative uncharacterized protein OS=Ailuropoda melanoleuca (Giant panda) GN=PANDA_006473 PE=3 SV=1;tr|G1LMP2|G1LMP2_AILME Uncharacterized protein OS=Ailuropoda melanoleuca (Giant panda) GN=SERPINF2 PE=3 SV=1	---	5;5;1	5;5;1	5;5;1	3	5	5	5	15.7	51.574	458	458;491;492	0	22.301				194	2976;4609;4932;5252;5644	True;True;True;True;True	3173;4929;5294;5641;6068	190735;309228;309229;309230;332204;356920;356921;356922;356923;356924;356925;356926;356927;356928;356929;356930;356931;356932;356933;356934;356935;356936;356937;356938;356939;356940;356941;356942;356943;356944;356945;356946;356947;356948;356949;356950;356951;356952;356953;356954;356955;386137	348551;561719;561720;561721;597266;653630;653631;653632;653633;653634;653635;653636;653637;653638;653639;653640;653641;653642;653643;653644;653645;653646;653647;653648;653649;653650;653651;653652;653653;653654;653655;653656;653657;653658;653659;653660;653661;653662;653663;653664;653665;706570	348551;561720;597266;653665;706570			P08697	A2AP_HUMAN	Alpha-2-antiplasmin OS=Homo sapiens (Human) GN=SERPINF2 PE=1 SV=3	2e-173	0.825	0.93	not checked	49008	49599		30876	21620	17700	26319	28065	34247	31099	44997
155	D2H8F7	D2H8F7;G1LTZ2	D2H8F7;G1LTZ2	Putative uncharacterized protein	tr|D2H8F7|D2H8F7_AILME Putative uncharacterized protein OS=Ailuropoda melanoleuca (Giant panda) GN=PANDA_006523 PE=4 SV=1;tr|G1LTZ2|G1LTZ2_AILME Uncharacterized protein OS=Ailuropoda melanoleuca (Giant panda) GN=ALDH7A1 PE=3 SV=1	---	4;4	4;4	4;4	2	4	4	4	13.2	44.72	417	417;479	0.004065	4.2538				195	5181;6997;8934;9225	True;True;True;True	5565;7603;9675;9989	353093;477846;477847;477848;477849;616323;640065;640066;640067	646170;873122;873123;873124;873125;1118328;1163422;1163423;1163424	646170;873124;1118328;1163423			P49419	AL7A1_HUMAN	Alpha-aminoadipic semialdehyde dehydrogenase OS=Homo sapiens (Human) GN=ALDH7A1 PE=1 SV=5	9.7e-215	0.966	0.995	ok
156	D2H8I5	D2H8I5;G1LPC4;G1LHX0	D2H8I5;G1LPC4;G1LHX0	Putative uncharacterized protein	tr|D2H8I5|D2H8I5_AILME Putative uncharacterized protein OS=Ailuropoda melanoleuca (Giant panda) GN=PANDA_006554 PE=3 SV=1;tr|G1LPC4|G1LPC4_AILME Uncharacterized protein OS=Ailuropoda melanoleuca (Giant panda) GN=PAICS PE=3 SV=1;tr|G1LHX0|G1LHX0_AILME Unc	---	2;2;1	2;2;1	2;2;1	3	2	2	2	6	46.527	420	420;429;395	0	8.6705				196	736;2012	True;True	794;2144	48985;48986;48987;48988;48989;132249;132250;132251;132252;132253;132254;132255	84227;84228;84229;84230;84231;243618;243619;243620;243621;243622;243623;243624	84228;243623			P22234	PUR6_HUMAN	Multifunctional protein ADE2 OS=Homo sapiens (Human) GN=PAICS PE=1 SV=3	3.5e-214	0.96	0.99	ok
157	D2H8J8	D2H8J8;G1M1T5	D2H8J8;G1M1T5	ATP synthase subunit alpha	tr|D2H8J8|D2H8J8_AILME ATP synthase subunit alpha OS=Ailuropoda melanoleuca (Giant panda) GN=PANDA_006569 PE=3 SV=1;tr|G1M1T5|G1M1T5_AILME ATP synthase subunit alpha OS=Ailuropoda melanoleuca (Giant panda) GN=ATP5A1 PE=3 SV=1	---	35;35	35;35	35;35	2	35	35	35	71	54.883	507	507;554	0	323.31				197	608;841;1768;2016;2098;2217;2356;2511;2671;3102;3222;3512;3537;4141;4366;5118;5386;5865;6048;6049;6724;6764;7000;7102;7206;7339;7387;7389;7963;8173;8472;8939;9162;9547;10073	True;True;True;True;True;True;True;True;True;True;True;True;True;True;True;True;True;True;True;True;True;True;True;True;True;True;True;True;True;True;True;True;True;True;True	654;908;1885;2148;2237;2367;2368;2515;2681;2851;3303;3434;3435;3741;3768;4412;4665;5497;5785;6303;6304;6498;6499;7317;7359;7606;7607;7711;7712;7823;7962;7963;8015;8017;8637;8858;9178;9680;9917;10323;10892	41939;41940;41941;41942;41943;41944;41945;41946;41947;41948;41949;41950;41951;41952;41953;41954;41955;41956;41957;41958;41959;41960;41961;41962;41963;41964;41965;41966;41967;41968;41969;41970;41971;41972;41973;41974;41975;41976;41977;41978;41979;41980;41981;41982;41983;41984;41985;41986;41987;41988;41989;41990;41991;41992;41993;41994;41995;41996;41997;54515;54516;54517;54518;54519;54520;54521;545…	73467;73468;73469;73470;73471;73472;73473;73474;73475;73476;73477;73478;73479;73480;73481;73482;73483;73484;73485;73486;73487;73488;73489;73490;73491;73492;73493;73494;73495;73496;73497;73498;73499;73500;73501;73502;73503;73504;73505;73506;73507;73508;73509;73510;73511;73512;73513;73514;73515;73516;73517;73518;73519;73520;73521;73522;73523;73524;73525;73526;73527;73528;73529;73530;73531;73532;735…				P25705	ATPA_HUMAN	ATP synthase subunit alpha, mitochondrial OS=Homo sapiens (Human) GN=ATP5A1 PE=1 SV=1	1.2e-210	0.984	1	ok	19128000	19720000	26050000	25089000	23411000	22001000	25716000	24356000	21933000	23958000	20861000
158	D2H8L6	D2H8L6	D2H8L6	Uncharacterized protein	tr|D2H8L6|D2H8L6_AILME Uncharacterized protein OS=Ailuropoda melanoleuca (Giant panda) GN=SYNPO PE=4 SV=1	SYNPO	5	5	5	1	5	5	5	8.3	98.774	924	924	0	15.134				198	6080;7361;7908;9517;10056	True;True;True;True;True	6530;7987;8579;10293;10874	420035;420036;499976;499977;499978;499979;499980;499981;499982;499983;499984;499985;499986;499987;499988;499989;499990;499991;499992;499993;530785;530786;530787;530788;661283;661284;661285;661286;661287;661288;661289;661290;661291;661292;661293;661294;661295;661296;661297;661298;661299;661300;661301;661302;661303;661304;661305;661306;661307;661308;661309;661310;661311;661312;661313;661314;694701	768760;768761;909825;909826;909827;909828;909829;909830;909831;909832;909833;909834;909835;909836;909837;909838;909839;909840;909841;909842;959676;959677;959678;959679;1198426;1198427;1198428;1198429;1198430;1198431;1198432;1198433;1198434;1198435;1198436;1198437;1198438;1198439;1198440;1198441;1198442;1198443;1198444;1198445;1198446;1198447;1198448;1198449;1198450;1198451;1198452;1198453;1198454…	768760;909830;959677;1198461;1260619			Q8N3V7	SYNPO_HUMAN	Synaptopodin OS=Homo sapiens (Human) GN=SYNPO PE=1 SV=2	9e-152	0.827	0.916	ok	46044		33880	34541	37993		40981	36952	44964	56945
159	D2H8P0	D2H8P0;G1LRJ2	D2H8P0;G1LRJ2	Putative uncharacterized protein	tr|D2H8P0|D2H8P0_AILME Putative uncharacterized protein OS=Ailuropoda melanoleuca (Giant panda) GN=PANDA_006618 PE=4 SV=1;tr|G1LRJ2|G1LRJ2_AILME Uncharacterized protein OS=Ailuropoda melanoleuca (Giant panda) GN=HNRNPU PE=4 SV=1	---	2;2	2;2	2;2	2	2	2	2	3.6	89.194	810	810;821	0.0053981	4.2051				199	2035;5603	True;True	2170;6025	133639;133640;133641;133642;133643;133644;384366	246341;246342;246343;246344;246345;246346;703588	246341;703588			Q00839	HNRPU_HUMAN	Heterogeneous nuclear ribonucleoprotein U OS=Homo sapiens (Human) GN=HNRNPU PE=1 SV=6	4.1e-165	0.935	0.957	ok					21917		21421	20347
160	D2H8Q0	D2H8Q0;G1M450	D2H8Q0;G1M450	Putative uncharacterized protein	tr|D2H8Q0|D2H8Q0_AILME Putative uncharacterized protein OS=Ailuropoda melanoleuca (Giant panda) GN=PANDA_006635 PE=3 SV=1;tr|G1M450|G1M450_AILME Uncharacterized protein OS=Ailuropoda melanoleuca (Giant panda) GN=CBR4 PE=3 SV=1	---	2;1	2;1	2;1	2	2	2	2	10.5	25.435	237	237;241	0.0014124	4.7943				200	3352;9216	True;True	3573;9978	212027;212028;212029;212030;212031;212032;639482;639483;639484;639485;639486;639487;639488;639489;639490;639491;639492;639493;639494;639495	385552;385553;385554;385555;385556;385557;1162434;1162435;1162436;1162437;1162438;1162439;1162440;1162441;1162442;1162443;1162444;1162445;1162446;1162447	385556;1162443			Q8N4T8	CBR4_HUMAN	Carbonyl reductase family member 4 OS=Homo sapiens (Human) GN=CBR4 PE=1 SV=3	5.3e-106	0.907	0.987	not checked				25900	34740	34553		28793	30346	32238
161	D2H8Q9	D2H8Q9	D2H8Q9	Uncharacterized protein	tr|D2H8Q9|D2H8Q9_AILME Uncharacterized protein OS=Ailuropoda melanoleuca (Giant panda) GN=PRELP PE=4 SV=1	PRELP	15	15	15	1	15	15	15	43.3	43.515	379	379	0	175.43				201	1782;2977;3923;4357;5007;5041;5104;5511;5652;5829;6524;6618;9307;9308;9706	True;True;True;True;True;True;True;True;True;True;True;True;True;True;True	1899;3174;4182;4656;5379;5414;5483;5914;6077;6078;6265;7089;7090;7198;10075;10076;10499	116679;116680;190736;190737;190738;190739;190740;190741;190742;190743;190744;190745;190746;190747;190748;190749;190750;190751;190752;190753;190754;190755;190756;190757;190758;190759;190760;190761;190762;190763;190764;190765;190766;190767;190768;190769;190770;190771;190772;190773;190774;190775;190776;190777;190778;190779;190780;190781;190782;190783;190784;190785;190786;190787;256266;256267;256268;…	213800;213801;348552;348553;348554;348555;348556;348557;348558;348559;348560;348561;348562;348563;348564;348565;348566;348567;348568;348569;348570;348571;348572;348573;348574;348575;348576;348577;348578;348579;348580;348581;348582;348583;348584;348585;348586;348587;348588;348589;348590;348591;348592;348593;348594;348595;348596;348597;348598;348599;348600;348601;348602;348603;348604;348605;348606;…	213801;348618;467269;528764;629261;632358;638619;689336;706944;734537;826310;843207;1175583;1175595;1227164	148;149	154;221	P51888	PRELP_HUMAN	Prolargin OS=Homo sapiens (Human) GN=PRELP PE=1 SV=1	1.2e-64	0.93	0.977	ok	575370	610480	205780	231170	1018700	853940	202250	173000	201570	233650	660630
162	G1MCS1	G1MCS1;D2H8X9	G1MCS1;D2H8X9	Uncharacterized protein	tr|G1MCS1|G1MCS1_AILME Uncharacterized protein OS=Ailuropoda melanoleuca (Giant panda) GN=CD36 PE=4 SV=1;tr|D2H8X9|D2H8X9_AILME Putative uncharacterized protein OS=Ailuropoda melanoleuca (Giant panda) GN=PANDA_006740 PE=4 SV=1	CD36	2;2	2;2	2;2	2	2	2	2	4	52.616	472	472;475	0	10.106				202	2531;5709	True;True	2703;6136	166672;166673;166674;166675;166676;166677;166678;391907;391908;391909;391910;391911;391912;391913;391914;391915;391916;391917;391918;391919;391920;391921;391922;391923;391924;391925;391926;391927;391928;391929;391930	308792;308793;308794;308795;308796;308797;308798;717302;717303;717304;717305;717306;717307;717308;717309;717310;717311;717312;717313;717314;717315;717316;717317;717318;717319;717320;717321;717322;717323;717324;717325	308795;717311			P16671	CD36_HUMAN	Platelet glycoprotein 4 OS=Homo sapiens (Human) GN=CD36 PE=1 SV=2	0	0.818	0.966	ok	36056	35475						28546
163	D2H8Y1	D2H8Y1;G1M2Y8	D2H8Y1;G1M2Y8	Putative uncharacterized protein	tr|D2H8Y1|D2H8Y1_AILME Putative uncharacterized protein OS=Ailuropoda melanoleuca (Giant panda) GN=PANDA_006743 PE=4 SV=1;tr|G1M2Y8|G1M2Y8_AILME Uncharacterized protein OS=Ailuropoda melanoleuca (Giant panda) GN=SNTA1 PE=4 SV=1	---	2;2	2;2	2;2	2	2	2	2	8.1	46.659	432	432;437	0	8.3815				203	7019;7425	True;True	7627;8056	479160;479161;479162;479163;479164;479165;479166;479167;479168;479169;479170;479171;479172;479173;479174;504058;504059;504060	875258;875259;875260;875261;875262;875263;875264;875265;875266;875267;875268;875269;875270;875271;875272;915650;915651;915652	875260;915651			Q13424	SNTA1_HUMAN	Alpha-1-syntrophin OS=Homo sapiens (Human) GN=SNTA1 PE=1 SV=1	5.2e-123	0.942	0.979	ok				20614						17947
164	D2H913	D2H913;G1M4Y3	D2H913;G1M4Y3	Putative uncharacterized protein	tr|D2H913|D2H913_AILME Putative uncharacterized protein OS=Ailuropoda melanoleuca (Giant panda) GN=PANDA_006778 PE=4 SV=1;tr|G1M4Y3|G1M4Y3_AILME Uncharacterized protein OS=Ailuropoda melanoleuca (Giant panda) GN=MYLK2 PE=4 SV=1	---	8;8	8;8	8;8	2	8	8	8	21.9	61.359	567	567;624	0	15.315				204	1229;3069;3242;4445;6209;7552;9131;9215	True;True;True;True;True;True;True;True	1309;3269;3456;4750;4751;6725;8194;9883;9977	76965;76966;76967;76968;76969;76970;76971;76972;76973;76974;76975;76976;76977;76978;76979;194550;194551;194552;194553;194554;194555;194556;194557;194558;194559;194560;194561;194562;194563;194564;194565;194566;194567;194568;194569;194570;194571;204972;295818;295819;295820;295821;295822;430043;430044;430045;430046;430047;509659;634162;639472;639473;639474;639475;639476;639477;639478;639479;639480;6…	132803;132804;132805;132806;132807;132808;132809;132810;132811;132812;132813;132814;132815;132816;132817;132818;132819;132820;132821;132822;132823;132824;354826;354827;354828;354829;354830;354831;354832;354833;354834;354835;354836;354837;354838;354839;354840;354841;354842;354843;354844;354845;354846;354847;371857;538734;538735;538736;538737;538738;788084;788085;788086;788087;788088;923682;1153087…	132811;354846;371857;538735;788087;923682;1153087;1162431	150	282	Q9H1R3	MYLK2_HUMAN	Myosin light chain kinase 2, skeletal/cardiac muscle OS=Homo sapiens (Human) GN=MYLK2 PE=1 SV=3	1.3e-80	0.877	0.942	not checked	64054	68710	79004	34400	79170		88691	84142	68783	92525	64180
165	D2H979	D2H979;G1LES3	D2H979;G1LES3	Putative uncharacterized protein	tr|D2H979|D2H979_AILME Putative uncharacterized protein OS=Ailuropoda melanoleuca (Giant panda) GN=PANDA_006857 PE=4 SV=1;tr|G1LES3|G1LES3_AILME Uncharacterized protein OS=Ailuropoda melanoleuca (Giant panda) GN=VDAC3 PE=4 SV=1	---	10;9	10;9	10;9	2	10	10	10	39.6	30.717	283	283;294	0	185.01				206	21;1030;3507;5828;5901;5902;8924;9228;9229;9733	True;True;True;True;True;True;True;True;True;True	22;1100;3736;6264;6345;6346;9664;9992;9993;10528	898;899;900;901;902;903;904;905;906;907;908;909;910;911;912;913;914;915;916;917;918;919;920;921;65955;224098;224099;224100;224101;224102;224103;224104;224105;224106;224107;224108;224109;224110;224111;224112;224113;224114;224115;224116;224117;224118;224119;224120;224121;224122;224123;224124;224125;224126;224127;224128;224129;402084;402085;402086;402087;402088;402089;402090;402091;402092;402093;402…	1238;1239;1240;1241;1242;1243;1244;1245;1246;1247;1248;1249;1250;1251;1252;1253;1254;1255;1256;1257;1258;1259;1260;1261;112680;408843;408844;408845;408846;408847;408848;408849;408850;408851;408852;408853;408854;408855;408856;408857;408858;408859;408860;408861;408862;408863;408864;408865;408866;408867;408868;408869;408870;408871;408872;408873;408874;408875;408876;408877;408878;408879;408880;408881…	1241;112680;408853;734517;749313;749573;1117152;1163529;1163554;1229674			Q9Y277	VDAC3_HUMAN	Voltage-dependent anion-selective channel protein 3 OS=Homo sapiens (Human) GN=VDAC3 PE=1 SV=1	8.4e-193	0.972	0.993	ok	966890	1003200	1059500	865810	1139900	1642700	1080200	1117800	1758500	1534200	994780
166	D2H9D5	D2H9D5;G1MFV3	D2H9D5;G1MFV3	Putative uncharacterized protein	tr|D2H9D5|D2H9D5_AILME Putative uncharacterized protein OS=Ailuropoda melanoleuca (Giant panda) GN=PANDA_006922 PE=4 SV=1;tr|G1MFV3|G1MFV3_AILME Uncharacterized protein OS=Ailuropoda melanoleuca (Giant panda) GN=NOL3 PE=4 SV=1	---	2;2	2;2	2;2	2	2	2	2	13.4	22.159	202	202;222	0.0090556	3.6362				207	5490;5969	True;True	5892;6419	374818;374819;374820;374821;374822;374823;374824;374825;374826;374827;374828;374829;374830;374831;374832;374833;374834;374835;374836;374837;374838;374839;374840;374841;374842;374843;413819;413820;413821;413822;413823;413824;413825;413826;413827;413828;413829;413830;413831;413832;413833	687678;687679;687680;687681;687682;687683;687684;687685;687686;687687;687688;687689;687690;687691;687692;687693;687694;687695;687696;687697;687698;687699;687700;687701;687702;687703;687704;757508;757509;757510;757511;757512;757513;757514;757515;757516;757517;757518;757519;757520;757521;757522;757523;757524	687687;757516			O60936	NOL3_HUMAN	Nucleolar protein 3 OS=Homo sapiens (Human) GN=NOL3 PE=1 SV=2	1.9e-45	0.827	0.875	not checked			23375	26618	13487	11869	27616	23104	31750	36130
167	D2H9H6	D2H9H6;G1M611	D2H9H6;G1M611	Putative uncharacterized protein	tr|D2H9H6|D2H9H6_AILME Putative uncharacterized protein OS=Ailuropoda melanoleuca (Giant panda) GN=PANDA_006972 PE=3 SV=1;tr|G1M611|G1M611_AILME Uncharacterized protein OS=Ailuropoda melanoleuca (Giant panda) GN=FH PE=3 SV=1	---	22;22	22;22	22;22	2	22	22	22	62.1	49.96	467	467;509	0	323.31				208	3;362;760;1887;2499;2637;3759;4493;5295;5551;5562;6224;7601;7676;7867;8229;8611;8612;8803;8804;9289;10128	True;True;True;True;True;True;True;True;True;True;True;True;True;True;True;True;True;True;True;True;True;True	4;388;389;818;2012;2669;2814;4006;4801;5686;5962;5980;5981;6745;8246;8247;8325;8535;8916;9329;9330;9539;9540;10057;10951	49;50;51;52;53;54;55;56;57;58;59;60;61;62;63;64;65;66;67;68;69;70;71;72;73;74;75;76;77;78;79;80;81;82;83;84;85;86;87;88;89;90;91;92;93;94;95;96;97;98;99;100;101;102;103;104;105;106;107;108;109;110;111;112;113;114;115;116;117;118;119;120;121;122;123;124;125;126;127;128;129;130;131;132;133;134;135;136;137;138;139;140;141;142;143;144;145;146;147;148;149;150;151;152;153;154;155;156;157;158;159;160;16…	59;60;61;62;63;64;65;66;67;68;69;70;71;72;73;74;75;76;77;78;79;80;81;82;83;84;85;86;87;88;89;90;91;92;93;94;95;96;97;98;99;100;101;102;103;104;105;106;107;108;109;110;111;112;113;114;115;116;117;118;119;120;121;122;123;124;125;126;127;128;129;130;131;132;133;134;135;136;137;138;139;140;141;142;143;144;145;146;147;148;149;150;151;152;153;154;155;156;157;158;159;160;161;162;163;164;165;166;167;168;…	65;47702;85436;223645;295787;318578;446183;549414;664650;698213;700183;789009;931863;938700;956106;1002045;1054045;1054107;1104875;1104978;1173081;1265614	151;152;153	108;121;325	P07954	FUMH_HUMAN	Fumarate hydratase, mitochondrial OS=Homo sapiens (Human) GN=FH PE=1 SV=3	1.8e-192	0.959	0.987	ok	848260	984340	2108500	2501400	1261400	1143400	1894300	1991100	1151500	1121300	1453000
168	D2H9P5	D2H9P5;G1L7F1	D2H9P5;G1L7F1	Putative uncharacterized protein	tr|D2H9P5|D2H9P5_AILME Putative uncharacterized protein OS=Ailuropoda melanoleuca (Giant panda) GN=PANDA_007067 PE=4 SV=1;tr|G1L7F1|G1L7F1_AILME Uncharacterized protein OS=Ailuropoda melanoleuca (Giant panda) GN=ANK1 PE=4 SV=1	---	7;7	7;7	7;7	2	7	7	7	7	206.73	1884	1884;1886	0	11.406				209	2157;4034;4922;5465;5484;8184;8630	True;True;True;True;True;True;True	2299;4298;5282;5866;5886;8870;9348	141041;141042;263684;263685;263686;263687;263688;263689;263690;263691;263692;263693;263694;263695;263696;263697;263698;263699;263700;263701;263702;263703;263704;263705;263706;263707;263708;331284;331285;373011;374524;374525;550902;550903;550904;581813;581814;581815;581816	259748;259749;480767;480768;480769;480770;480771;480772;480773;480774;480775;480776;480777;480778;480779;480780;480781;480782;480783;480784;480785;480786;480787;480788;480789;480790;480791;480792;595437;595438;684090;687197;687198;998663;998664;998665;1057456;1057457;1057458;1057459	259749;480786;595437;684090;687198;998663;1057459			P16157	ANK1_HUMAN	Ankyrin-1 OS=Homo sapiens (Human) GN=ANK1 PE=1 SV=3	0	0.917	0.964	ok	50093			38178							36697
169	D2H9W7	D2H9W7	D2H9W7	Uncharacterized protein	tr|D2H9W7|D2H9W7_AILME Uncharacterized protein OS=Ailuropoda melanoleuca (Giant panda) GN=CMBL PE=4 SV=1	CMBL	15	15	15	1	15	15	15	55.5	28.102	245	245	0	105.07				210	339;858;952;1546;1547;1790;2360;2395;3841;3930;4660;6517;6606;7349;8158	True;True;True;True;True;True;True;True;True;True;True;True;True;True;True	363;925;1021;1648;1649;1907;2519;2558;4091;4189;4983;7082;7186;7975;8842	25340;25341;25342;25343;25344;25345;25346;25347;25348;25349;25350;25351;25352;25353;25354;25355;25356;25357;25358;25359;25360;25361;25362;25363;25364;25365;25366;25367;25368;25369;25370;25371;25372;25373;58211;58212;58213;58214;58215;58216;58217;58218;58219;58220;58221;58222;58223;58224;58225;58226;58227;58228;58229;58230;58231;58232;58233;58234;58235;58236;58237;58238;58239;58240;58241;58242;582…	45019;45020;45021;45022;45023;45024;45025;45026;45027;45028;45029;45030;45031;45032;45033;45034;45035;45036;45037;45038;45039;45040;45041;45042;45043;45044;45045;45046;45047;45048;45049;45050;45051;45052;45053;45054;45055;45056;45057;45058;100586;100587;100588;100589;100590;100591;100592;100593;100594;100595;100596;100597;100598;100599;100600;100601;100602;100603;100604;100605;100606;100607;10060…	45019;100636;106924;188540;188542;214162;281472;285098;455684;467469;568138;825991;842633;907952;995968			Q96DG6	CMBL_HUMAN	Carboxymethylenebutenolidase homolog OS=Homo sapiens (Human) GN=CMBL PE=1 SV=1	1.9e-128	0.869	0.971	ok	142800	247390	199480	223820	358010	269800	207260	222210	374290	340790	214520
170	D2H9W8	D2H9W8	D2H9W8	Uncharacterized protein	tr|D2H9W8|D2H9W8_AILME Uncharacterized protein OS=Ailuropoda melanoleuca (Giant panda) GN=CCT5 PE=3 SV=1	CCT5	5	5	5	1	5	5	5	12.2	59.682	541	541	0	14.463				211	753;2733;3777;5221;9753	True;True;True;True;True	811;2916;4024;5609;10549	49643;49644;49645;49646;49647;49648;49649;49650;49651;49652;49653;49654;176893;246325;246326;355799;355800;355801;355802;355803;355804;355805;355806;355807;355808;355809;355810;355811;355812;355813;355814;355815;355816;355817;677910;677911;677912;677913;677914;677915;677916;677917;677918;677919;677920	85182;85183;85184;85185;85186;85187;85188;85189;85190;85191;85192;85193;325595;450217;450218;651694;651695;651696;651697;651698;651699;651700;651701;651702;651703;651704;651705;651706;651707;651708;651709;651710;651711;651712;1233046;1233047;1233048;1233049;1233050;1233051;1233052;1233053;1233054;1233055;1233056	85187;325595;450218;651712;1233053			P48643	TCPE_HUMAN	T-complex protein 1 subunit epsilon OS=Homo sapiens (Human) GN=CCT5 PE=1 SV=1	0	0.982	1	ok			25160	24335	30139		19586		23359
171	D2HA03	D2HA03;G1L427	D2HA03;G1L427	Putative uncharacterized protein	tr|D2HA03|D2HA03_AILME Putative uncharacterized protein OS=Ailuropoda melanoleuca (Giant panda) GN=PANDA_007201 PE=4 SV=1;tr|G1L427|G1L427_AILME Uncharacterized protein OS=Ailuropoda melanoleuca (Giant panda) GN=EEPD1 PE=4 SV=1	---	2;2	2;2	2;2	2	2	2	2	4.7	62.553	569	569;571	0.0027663	4.4089				212	5142;8794	True;True	5523;9529	351500;607416;607417;607418;607419;607420;607421;607422;607423;607424;607425;607426;607427;607428;607429;607430;607431;607432;607433;607434;607435;607436;607437;607438;607439;607440	643342;643343;1103884;1103885;1103886;1103887;1103888;1103889;1103890;1103891;1103892;1103893;1103894;1103895;1103896;1103897;1103898;1103899;1103900;1103901;1103902;1103903;1103904;1103905;1103906;1103907;1103908	643342;1103904			Q7L9B9	EEPD1_HUMAN	Endonuclease/exonuclease/phosphatase family domain-containing protein 1 OS=Homo sapiens (Human) GN=EEPD1 PE=1 SV=2	0	0.928	0.981	ok				23254	16979	26923	22984			21606
172	D2HA21	D2HA21	D2HA21	Uncharacterized protein	tr|D2HA21|D2HA21_AILME Uncharacterized protein OS=Ailuropoda melanoleuca (Giant panda) GN=PARK7 PE=4 SV=1	PARK7	11	11	11	1	11	11	11	65.1	19.993	189	189	0	160.88				214	536;1264;1926;2838;3166;3259;3260;4586;4623;9494;9495	True;True;True;True;True;True;True;True;True;True;True	577;1346;2056;3028;3029;3373;3474;3475;4905;4944;10266;10267	38145;38146;38147;38148;38149;38150;38151;38152;38153;38154;38155;38156;38157;38158;38159;38160;38161;38162;79391;79392;79393;79394;79395;79396;79397;79398;79399;79400;79401;79402;79403;79404;79405;79406;79407;79408;79409;79410;79411;79412;79413;79414;79415;79416;79417;79418;79419;79420;79421;79422;79423;79424;124454;124455;124456;124457;124458;124459;124460;124461;124462;124463;124464;124465;124…	66804;66805;66806;66807;66808;66809;66810;66811;66812;66813;66814;66815;66816;66817;66818;66819;66820;66821;66822;66823;66824;66825;66826;66827;136493;136494;136495;136496;136497;136498;136499;136500;136501;136502;136503;136504;136505;136506;136507;136508;136509;136510;136511;136512;136513;136514;136515;136516;136517;136518;136519;136520;136521;136522;136523;136524;136525;136526;136527;136528;136…	66823;136541;227680;338603;364885;372614;372644;561002;562409;1196466;1196522	154	17	Q99497	PARK7_HUMAN	Protein deglycase DJ-1 OS=Homo sapiens (Human) GN=PARK7 PE=1 SV=2	1.3e-91	0.963	0.995	ok	1071400	1143100	1043500	1095900	608470	527210	1421700	1580100	94006	91543	1134900
173	D2HAD1	D2HAD1;G1LXR8	D2HAD1;G1LXR8	Isocitrate dehydrogenase [NAD] subunit, mitochondrial	tr|D2HAD1|D2HAD1_AILME Isocitrate dehydrogenase [NAD] subunit, mitochondrial OS=Ailuropoda melanoleuca (Giant panda) GN=PANDA_007371 PE=3 SV=1;tr|G1LXR8|G1LXR8_AILME Isocitrate dehydrogenase [NAD] subunit, mitochondrial OS=Ailuropoda melanoleuca (Giant p	---	18;18	18;18	18;18	2	18	18	18	54.1	38.989	355	355;385	0	170				215	80;81;2256;2442;2935;3449;3646;3667;3676;4026;4697;5027;5143;5144;5209;6444;7320;8807	True;True;True;True;True;True;True;True;True;True;True;True;True;True;True;True;True;True	86;87;2411;2608;3130;3676;3882;3904;3913;4290;5033;5399;5524;5525;5596;7008;7943;9543	3933;3934;3935;3936;3937;3938;3939;3940;3941;3942;3943;3944;3945;3946;3947;3948;3949;3950;3951;3952;3953;3954;3955;3956;3957;3958;3959;3960;3961;3962;3963;148446;148447;148448;148449;148450;148451;148452;148453;148454;148455;148456;148457;148458;148459;148460;148461;148462;148463;148464;148465;148466;148467;148468;148469;148470;148471;148472;148473;148474;148475;148476;148477;148478;148479;148480…	5922;5923;5924;5925;5926;5927;5928;5929;5930;5931;5932;5933;5934;5935;5936;5937;5938;5939;5940;5941;5942;5943;5944;5945;5946;5947;5948;5949;5950;5951;5952;273455;273456;273457;273458;273459;273460;273461;273462;273463;273464;273465;273466;273467;273468;273469;273470;273471;273472;273473;273474;273475;273476;273477;273478;273479;273480;273481;273482;273483;273484;273485;273486;273487;273488;273489…	5923;5945;273467;288471;345549;401655;434415;436667;436922;480698;573837;631538;643345;643390;648684;815230;906677;1105051	155	95	O43837	IDH3B_HUMAN	Isocitrate dehydrogenase [NAD] subunit beta, mitochondrial OS=Homo sapiens (Human) GN=IDH3B PE=1 SV=2	1.4e-199	0.946	0.98	ok	453040	552450	1159200	1078200	649830	564900	1028600	865940	631690	638870	767510
174	D2HAI8	D2HAI8;G1MIN3	D2HAI8;G1MIN3	Putative uncharacterized protein	tr|D2HAI8|D2HAI8_AILME Putative uncharacterized protein OS=Ailuropoda melanoleuca (Giant panda) GN=PANDA_007435 PE=4 SV=1;tr|G1MIN3|G1MIN3_AILME Uncharacterized protein OS=Ailuropoda melanoleuca (Giant panda) GN=EIF5 PE=4 SV=1	---	4;4	4;4	4;4	2	4	4	4	10.1	46.464	406	406;430	0.0015106	6.5128				216	555;4982;9172;9219	True;True;True;True	599;5352;9929;9982	38563;38564;38565;38566;337540;637535;637536;637537;637538;637539;639608;639609;639610;639611;639612;639613;639614;639615;639616;639617;639618;639619;639620;639621;639622;639623;639624;639625;639626;639627;639628;639629	67451;67452;67453;67454;608012;1159950;1159951;1159952;1159953;1159954;1162598;1162599;1162600;1162601;1162602;1162603;1162604;1162605;1162606;1162607;1162608;1162609;1162610;1162611;1162612;1162613;1162614;1162615;1162616;1162617;1162618;1162619	67452;608012;1159950;1162616			P55010	IF5_HUMAN	Eukaryotic translation initiation factor 5 OS=Homo sapiens (Human) GN=EIF5 PE=1 SV=2	5.2e-107	0.968	0.993	ok										21685
175	D2HAK6	D2HAK6;G1LSK6	D2HAK6;G1LSK6	Putative uncharacterized protein	tr|D2HAK6|D2HAK6_AILME Putative uncharacterized protein OS=Ailuropoda melanoleuca (Giant panda) GN=PANDA_007475 PE=3 SV=1;tr|G1LSK6|G1LSK6_AILME Uncharacterized protein OS=Ailuropoda melanoleuca (Giant panda) GN=TPM2 PE=4 SV=1	---	45;35	45;35	7;0	2	45	45	7	75.5	29.752	257	257;312	0	323.31				217	18;215;227;558;762;763;987;988;1004;1129;1130;1188;1798;1799;3390;3391;3392;3611;3612;4302;4303;4472;4540;4541;4747;4748;4867;4952;4953;5081;5402;5403;5989;5990;6134;7058;7059;7318;7319;7515;7702;7703;10031;10032;10053	True;True;True;True;True;True;True;True;True;True;True;True;True;True;True;True;True;True;True;True;True;True;True;True;True;True;True;True;True;True;True;True;True;True;True;True;True;True;True;True;True;True;True;True;True	19;228;240;603;821;822;1056;1057;1074;1204;1205;1265;1915;1916;3612;3613;3614;3844;3845;4594;4595;4779;4856;4857;5086;5087;5220;5319;5320;5457;5803;5804;6439;6440;6611;7667;7668;7941;7942;8156;8355;8356;10846;10847;10871	833;834;835;836;837;838;839;840;841;842;843;844;845;846;847;848;849;850;851;852;853;854;855;856;857;858;859;860;861;12465;12466;12467;12468;12469;12470;12471;12472;12473;12474;12873;12874;38642;38643;38644;38645;38646;50021;50022;50023;50024;50025;50026;50027;50028;50029;50030;50031;50032;50033;50034;50035;50036;50037;50038;50039;50040;50041;50042;50043;50044;50045;50046;50047;50048;50049;50050;5…					P07951	TPM2_HUMAN	Tropomyosin beta chain OS=Homo sapiens (Human) GN=TPM2 PE=1 SV=1	3.8e-42	0.996	1	ok	28194000	28217000	25609000	27640000	44770000	46941000	34963000	32264000	29469000	36644000	25659000
176	D2HAP9	D2HAP9;G1LUV8;I0IVB4	D2HAP9;G1LUV8;I0IVB4	Putative uncharacterized protein	tr|D2HAP9|D2HAP9_AILME Putative uncharacterized protein OS=Ailuropoda melanoleuca (Giant panda) GN=PANDA_007532 PE=4 SV=1;tr|G1LUV8|G1LUV8_AILME Uncharacterized protein OS=Ailuropoda melanoleuca (Giant panda) GN=PDK4 PE=4 SV=1;tr|I0IVB4|I0IVB4_URSTH Pyru	---	4;4;3	4;4;3	4;4;3	3	4	4	4	10	46.233	408	408;444;223	0.002751	4.3799				218	518;1971;6323;8462	True;True;True;True	556;2102;6879;9168	36212;36213;36214;36215;36216;36217;36218;36219;36220;36221;36222;36223;36224;36225;36226;36227;36228;36229;36230;36231;36232;126096;126097;126098;126099;126100;439247;439248;439249;439250;439251;568455;568456;568457;568458;568459;568460;568461;568462;568463	63413;63414;63415;63416;63417;63418;63419;63420;63421;63422;63423;63424;63425;63426;63427;63428;63429;63430;63431;63432;63433;63434;229986;229987;229988;229989;229990;804647;804648;804649;804650;804651;1026827;1026828;1026829;1026830;1026831;1026832;1026833;1026834;1026835	63428;229987;804648;1026831			Q16654	PDK4_HUMAN	[Pyruvate dehydrogenase (acetyl-transferring)] kinase isozyme 4, mitochondrial OS=Homo sapiens (Human) GN=PDK4 PE=1 SV=1	0	0.946	0.988	OK
177	D2HAQ2	D2HAQ2;G1LV51;G1LV59	D2HAQ2;G1LV51;G1LV59	Putative uncharacterized protein	tr|D2HAQ2|D2HAQ2_AILME Putative uncharacterized protein OS=Ailuropoda melanoleuca (Giant panda) GN=PANDA_007536 PE=3 SV=1;tr|G1LV51|G1LV51_AILME Uncharacterized protein OS=Ailuropoda melanoleuca (Giant panda) GN=SLC25A13 PE=3 SV=1;tr|G1LV59|G1LV59_AILME	---	7;7;6	4;4;3	4;4;3	3	7	4	4	15.2	71.898	653	653;671;484	0	22.557				219	2559;3173;3790;5751;5937;7903;9830	True;True;True;False;False;True;False	2732;3380;4037;6185;6385;8574;10635	167965;167966;167967;167968;167969;167970;167971;167972;167973;167974;167975;167976;167977;167978;167979;167980;167981;167982;167983;201278;201279;201280;201281;201282;201283;201284;201285;201286;201287;201288;201289;201290;201291;201292;201293;201294;201295;201296;201297;201298;201299;201300;201301;201302;201303;201304;201305;201306;201307;201308;201309;201310;201311;201312;201313;201314;201315;…	310631;310632;310633;310634;310635;310636;310637;310638;310639;310640;310641;310642;310643;310644;310645;310646;310647;310648;310649;365308;365309;365310;365311;365312;365313;365314;365315;365316;365317;365318;365319;365320;365321;365322;365323;365324;365325;365326;365327;365328;365329;365330;365331;365332;365333;365334;365335;365336;365337;365338;365339;365340;365341;365342;365343;365344;365345;…	310640;365379;451298;727636;754163;959285;1241790			Q9UJS0	CMC2_HUMAN	Calcium-binding mitochondrial carrier protein Aralar2 OS=Homo sapiens (Human) GN=SLC25A13 PE=1 SV=2	0	0.971	0.991	ok	227320	138980	242980	175530	247890	299630	129020	330290	323420	330440	205270
178	D2HAR8	D2HAR8;G1LMU0	D2HAR8;G1LMU0	Putative uncharacterized protein	tr|D2HAR8|D2HAR8_AILME Putative uncharacterized protein OS=Ailuropoda melanoleuca (Giant panda) GN=PANDA_007559 PE=4 SV=1;tr|G1LMU0|G1LMU0_AILME Uncharacterized protein OS=Ailuropoda melanoleuca (Giant panda) GN=TKT PE=4 SV=1	---	8;8	8;8	8;8	2	8	8	8	20.1	64.164	587	587;597	0	19.135				220	844;4033;4186;4963;5268;6555;7673;9093	True;True;True;True;True;True;True;True	911;4297;4461;5332;5659;7125;8322;9843	54652;263674;263675;263676;263677;263678;263679;263680;263681;263682;263683;277257;277258;277259;336582;336583;336584;336585;336586;336587;357510;357511;455430;455431;455432;517526;630240;630241;630242;630243;630244;630245;630246;630247;630248;630249;630250;630251;630252;630253;630254;630255;630256;630257;630258;630259;630260;630261;630262;630263;630264;630265;630266;630267;630268;630269;630270;6…	92818;480757;480758;480759;480760;480761;480762;480763;480764;480765;480766;506052;506053;506054;606762;606763;606764;606765;606766;606767;654633;654634;836635;836636;836637;938614;1147049;1147050;1147051;1147052;1147053;1147054;1147055;1147056;1147057;1147058;1147059;1147060;1147061;1147062;1147063;1147064;1147065;1147066;1147067;1147068;1147069;1147070;1147071;1147072;1147073;1147074;1147075;11…	92818;480758;506053;606764;654634;836636;938614;1147051			P29401	TKT_HUMAN	Transketolase OS=Homo sapiens (Human) GN=TKT PE=1 SV=3	0	0.915	0.983	ok			39529	36804	36130	43360		37210	39296	40738
179	D2HAS3	D2HAS3;G1LNJ1	D2HAS3;G1LNJ1	Putative uncharacterized protein	tr|D2HAS3|D2HAS3_AILME Putative uncharacterized protein OS=Ailuropoda melanoleuca (Giant panda) GN=PANDA_007564 PE=4 SV=1;tr|G1LNJ1|G1LNJ1_AILME Uncharacterized protein OS=Ailuropoda melanoleuca (Giant panda) GN=ITIH4 PE=4 SV=1	---	8;8	8;8	7;7	2	8	8	7	9.4	99.865	901	901;920	0	12.914				221	747;2326;4915;5757;6709;9330;9342;9500	True;True;True;True;True;True;True;True	805;2485;5275;6191;7300;10098;10110;10272	49462;151748;151749;151750;151751;151752;151753;151754;151755;151756;151757;151758;331139;397725;397726;397727;397728;397729;397730;397731;397732;397733;397734;464071;464072;647870;647871;647872;647873;647874;647875;647876;647877;647878;647879;647880;647881;647882;649175;660198;660199;660200;660201;660202;660203;660204;660205;660206;660207;660208;660209;660210	84868;278688;278689;278690;278691;278692;278693;278694;278695;278696;278697;278698;595265;727918;727919;727920;727921;727922;727923;727924;727925;727926;727927;850347;850348;1178287;1178288;1178289;1178290;1178291;1178292;1178293;1178294;1178295;1178296;1178297;1178298;1178299;1180827;1196679;1196680;1196681;1196682;1196683;1196684;1196685;1196686;1196687;1196688;1196689;1196690;1196691	84868;278691;595265;727921;850348;1178293;1180827;1196679			Q14624	ITIH4_HUMAN	Inter-alpha-trypsin inhibitor heavy chain H4 OS=Homo sapiens (Human) GN=ITIH4 PE=1 SV=4	0	0.728	0.874	ok	53102	56444	50690	90329	40201				30724	26935	41009
180	D2HAU6	D2HAU6;G1LRI0	D2HAU6;G1LRI0	Putative uncharacterized protein	tr|D2HAU6|D2HAU6_AILME Putative uncharacterized protein OS=Ailuropoda melanoleuca (Giant panda) GN=PANDA_007594 PE=4 SV=1;tr|G1LRI0|G1LRI0_AILME Uncharacterized protein OS=Ailuropoda melanoleuca (Giant panda) PE=4 SV=1	---	10;10	10;10	10;10	2	10	10	10	33.9	45.601	407	407;498	0	42.022				222	282;1898;2801;5836;8423;8562;8666;9202;9522;9615	True;True;True;True;True;True;True;True;True;True	298;2023;2987;6273;9126;9275;9392;9963;10298;10404	20441;20442;20443;20444;20445;20446;122773;122774;122775;122776;122777;122778;122779;122780;122781;122782;122783;122784;122785;122786;122787;122788;122789;122790;181706;181707;181708;402383;402384;402385;402386;402387;402388;402389;402390;402391;402392;402393;402394;402395;402396;402397;402398;402399;402400;402401;402402;402403;402404;402405;402406;402407;402408;402409;402410;402411;402412;402413…	34865;34866;34867;34868;34869;34870;224472;224473;224474;224475;224476;224477;224478;224479;224480;224481;224482;224483;224484;224485;224486;224487;224488;224489;224490;333473;333474;333475;734815;734816;734817;734818;734819;734820;734821;734822;734823;734824;734825;734826;734827;734828;734829;734830;734831;734832;734833;734834;734835;734836;734837;734838;734839;734840;734841;734842;734843;734844…	34869;224473;333473;734841;1023299;1048694;1063066;1161662;1198798;1213911			Q03154	ACY1_HUMAN	Aminoacylase-1 OS=Homo sapiens (Human) GN=ACY1 PE=1 SV=1	0	0.867	0.963	ok			101510	96658	57443		111430	85997	85294	88399
181	D2HAY5	D2HAY5;G1LCW8	D2HAY5;G1LCW8	Putative uncharacterized protein	tr|D2HAY5|D2HAY5_AILME Putative uncharacterized protein OS=Ailuropoda melanoleuca (Giant panda) GN=PANDA_007641 PE=4 SV=1;tr|G1LCW8|G1LCW8_AILME Uncharacterized protein OS=Ailuropoda melanoleuca (Giant panda) GN=NDUFA5 PE=4 SV=1	---	3;3	3;3	3;3	2	3	3	3	47.4	11.269	95	95;116	0	7.4003				223	4130;4707;10066	True;True;True	4401;5043;10885	273954;273955;273956;273957;317958;317959;317960;317961;317962;694922	499438;499439;499440;499441;499442;575416;575417;575418;575419;575420;575421;1260895	499442;575419;1260895			Q16718	NDUA5_HUMAN	NADH dehydrogenase [ubiquinone] 1 alpha subcomplex subunit 5 OS=Homo sapiens (Human) GN=NDUFA5 PE=1 SV=3	5.3e-35	0.905	0.979	not checked				24634				29900
182	D2HB51	D2HB51;G1MM79;D2HJZ3	D2HB51;G1MM79;D2HJZ3	Putative uncharacterized protein	tr|D2HB51|D2HB51_AILME Putative uncharacterized protein OS=Ailuropoda melanoleuca (Giant panda) GN=PANDA_007722 PE=4 SV=1;tr|G1MM79|G1MM79_AILME Uncharacterized protein OS=Ailuropoda melanoleuca (Giant panda) GN=CHCHD3 PE=4 SV=1;tr|D2HJZ3|D2HJZ3_AILME Pu	---	5;5;3	5;5;3	4;4;3	3	5	5	4	20.5	25.583	220	220;221;123	0	10.383				224	234;3712;5788;8624;9526	True;True;True;True;True	247;3956;6223;9342;10302	13058;13059;13060;13061;13062;13063;13064;13065;13066;13067;13068;13069;13070;13071;13072;13073;13074;13075;13076;13077;13078;13079;13080;13081;13082;13083;13084;13085;13086;13087;13088;13089;13090;13091;13092;13093;13094;13095;13096;242021;242022;242023;242024;242025;242026;242027;242028;400058;400059;400060;400061;400062;400063;400064;400065;400066;400067;400068;400069;581568;581569;581570;5815…	22405;22406;22407;22408;22409;22410;22411;22412;22413;22414;22415;22416;22417;22418;22419;22420;22421;22422;22423;22424;22425;22426;22427;22428;22429;22430;22431;22432;22433;22434;22435;22436;22437;22438;22439;22440;22441;22442;22443;22444;22445;22446;22447;22448;22449;22450;22451;22452;22453;22454;22455;22456;22457;22458;22459;22460;22461;22462;22463;22464;22465;22466;22467;22468;22469;22470;224…	22411;442453;731339;1057021;1198954			Q9NX63	MIC19_HUMAN	MICOS complex subunit MIC19 OS=Homo sapiens (Human) GN=CHCHD3 PE=1 SV=1	1.5e-51	0.876	0.96	ok	136780	134460	178440	185430	223330	218490		140770	156390	157760	160300
183	D2HBH1	D2HBH1;G1LDS9	D2HBH1;G1LDS9	Putative uncharacterized protein	tr|D2HBH1|D2HBH1_AILME Putative uncharacterized protein OS=Ailuropoda melanoleuca (Giant panda) GN=PANDA_007871 PE=4 SV=1;tr|G1LDS9|G1LDS9_AILME Uncharacterized protein OS=Ailuropoda melanoleuca (Giant panda) GN=SYPL2 PE=4 SV=1	---	2;2	2;2	2;2	2	2	2	2	8.6	29.608	268	268;373	0	25.462				226	1650;5089	True;True	1760;5468	110131;110132;110133;110134;110135;110136;110137;110138;110139;110140;110141;110142;110143;110144;110145;110146;110147;110148;110149;110150;110151;110152;110153;110154;110155;110156;110157;110158;110159;110160;110161;110162;110163;110164;110165;110166;110167;110168;110169;110170;110171;110172;110173;110174;110175;110176;110177;110178;110179;110180;110181;110182;110183;110184;110185;110186;110187;…	201912;201913;201914;201915;201916;201917;201918;201919;201920;201921;201922;201923;201924;201925;201926;201927;201928;201929;201930;201931;201932;201933;201934;201935;201936;201937;201938;201939;201940;201941;201942;201943;201944;201945;201946;201947;201948;201949;201950;201951;201952;201953;201954;201955;201956;201957;201958;201959;201960;201961;201962;201963;201964;201965;201966;201967;201968;…	202091;637632			Q5VXT5	SYPL2_HUMAN	Synaptophysin-like protein 2 OS=Homo sapiens (Human) GN=SYPL2 PE=2 SV=1	5.8e-133	0.926	0.967	ok	122320	120220	92093	96450	50959	63561	105730	92814	86225	81255	140220
184	D2HBH9	D2HBH9;G1LEG7	D2HBH9;G1LEG7	Putative uncharacterized protein	tr|D2HBH9|D2HBH9_AILME Putative uncharacterized protein OS=Ailuropoda melanoleuca (Giant panda) GN=PANDA_007882 PE=3 SV=1;tr|G1LEG7|G1LEG7_AILME Uncharacterized protein OS=Ailuropoda melanoleuca (Giant panda) GN=LOC100483428 PE=3 SV=1	---	21;21	21;21	3;3	2	21	21	3	69.8	23.925	202	202;229	0	190.11				227	1013;2611;3663;3664;3806;4328;4652;4653;4872;5241;5485;5486;5766;5767;6083;6112;7368;7869;8748;9520;10080	True;True;True;True;True;True;True;True;True;True;True;True;True;True;True;True;True;True;True;True;True	1083;2787;3899;3900;4053;4622;4623;4974;4975;5226;5227;5629;5887;5888;6200;6201;6533;6573;7994;8537;9478;9479;10296;10900;10901	65210;65211;65212;65213;65214;65215;65216;65217;65218;65219;65220;65221;170998;170999;171000;171001;171002;171003;171004;171005;171006;171007;171008;171009;171010;171011;171012;171013;171014;171015;238367;238368;238369;238370;238371;238372;238373;238374;238375;238376;238377;238378;238379;248120;248121;248122;287771;287772;287773;287774;287775;287776;287777;287778;287779;287780;287781;287782;28778…	111239;111240;111241;111242;111243;111244;111245;111246;111247;111248;111249;111250;111251;111252;111253;111254;111255;315801;315802;315803;315804;315805;315806;315807;315808;315809;315810;315811;315812;315813;315814;315815;315816;315817;315818;436443;436444;436445;436446;436447;436448;436449;436450;436451;436452;436453;436454;436455;436456;452995;452996;452997;525599;525600;525601;525602;525603;…	111239;315806;436444;436456;452996;525600;566773;566789;593486;652638;687338;687343;728886;729039;768938;770902;910219;956130;1096585;1198555;1261866	158;159	19;89	P09488	GSTM1_HUMAN	Glutathione S-transferase Mu 1 OS=Homo sapiens (Human) GN=GSTM1 PE=1 SV=3	1.6e-86	0.827	0.95	ok	1562800	1859400	2161000	2214100	3202900	3238900	3036300	2800400	2687500	2494800	2016700
185	D2HBJ3	D2HBJ3	D2HBJ3	Leukotriene A(4) hydrolase	tr|D2HBJ3|D2HBJ3_AILME Leukotriene A(4) hydrolase OS=Ailuropoda melanoleuca (Giant panda) GN=LTA4H PE=3 SV=1	LTA4H	7	7	7	1	7	7	7	16.9	69.317	611	611	0	31.37				228	374;1425;3360;6032;7735;7766;9677	True;True;True;True;True;True;True	401;1513;3581;6482;8390;8422;10467	27356;27357;92293;92294;92295;92296;92297;92298;92299;92300;92301;92302;92303;92304;92305;92306;92307;92308;92309;92310;92311;92312;92313;92314;92315;92316;92317;92318;92319;212408;417909;417910;417911;417912;520957;522122;672636;672637;672638;672639;672640;672641;672642;672643;672644;672645;672646;672647;672648;672649;672650;672651;672652;672653;672654;672655;672656;672657;672658;672659;672660;6…	48255;48256;164722;164723;164724;164725;164726;164727;164728;164729;164730;164731;164732;164733;164734;164735;164736;164737;164738;164739;164740;164741;164742;164743;164744;164745;164746;164747;164748;386119;765622;765623;765624;765625;943656;945408;1218483;1218484;1218485;1218486;1218487;1218488;1218489;1218490;1218491;1218492;1218493;1218494;1218495;1218496;1218497;1218498;1218499;1218500;12185…	48255;164733;386119;765624;943656;945408;1218483			P09960	LKHA4_HUMAN	Leukotriene A-4 hydrolase OS=Homo sapiens (Human) GN=LTA4H PE=1 SV=2	0	0.951	0.993	ok			41198	41396			39701	39788		37161
186	D2HBK3	D2HBK3;G1L684	D2HBK3;G1L684	Putative uncharacterized protein	tr|D2HBK3|D2HBK3_AILME Putative uncharacterized protein OS=Ailuropoda melanoleuca (Giant panda) GN=PANDA_007910 PE=4 SV=1;tr|G1L684|G1L684_AILME Uncharacterized protein OS=Ailuropoda melanoleuca (Giant panda) GN=NDUFA12 PE=4 SV=1	---	5;5	5;5	5;5	2	5	5	5	43.4	17.124	145	145;149	0	9.215				229	2689;4288;6132;6680;8944	True;True;True;True;True	2870;4579;6609;7264;9685	175220;175221;175222;175223;175224;175225;283851;283852;283853;423921;423922;423923;423924;423925;423926;423927;423928;423929;423930;423931;423932;462624;616805	322987;322988;322989;322990;322991;322992;517987;517988;517989;517990;774577;774578;774579;774580;774581;774582;774583;774584;774585;774586;774587;774588;774589;774590;774591;774592;848123;1118979	322992;517988;774588;848123;1118979			Q9UI09	NDUAC_HUMAN	NADH dehydrogenase [ubiquinone] 1 alpha subcomplex subunit 12 OS=Homo sapiens (Human) GN=NDUFA12 PE=1 SV=1	1.1e-67	0.917	0.986	ok	16938	18934	42072	54954				55630
187	G1LJD7	G1LJD7;D2HBL4	G1LJD7;D2HBL4	Uncharacterized protein	tr|G1LJD7|G1LJD7_AILME Uncharacterized protein OS=Ailuropoda melanoleuca (Giant panda) GN=GARS PE=3 SV=1;tr|D2HBL4|D2HBL4_AILME Putative uncharacterized protein OS=Ailuropoda melanoleuca (Giant panda) GN=PANDA_007924 PE=3 SV=1	GARS	4;4	4;4	4;4	2	4	4	4	8.4	82.867	737	737;737	0	11.385				230	2136;5207;8150;8335	True;True;True;True	2278;5594;8834;9031	139777;354423;354424;354425;354426;354427;354428;354429;354430;354431;354432;354433;354434;354435;354436;354437;354438;354439;354440;354441;354442;354443;354444;354445;354446;354447;354448;354449;354450;354451;548834;548835;548836;548837;548838;548839;548840;548841;548842;548843;548844;548845;548846;548847;548848;548849;548850;548851;548852;548853;548854;548855;548856;548857;548858;548859;548860;…	257392;648596;648597;648598;648599;648600;648601;648602;648603;648604;648605;648606;648607;648608;648609;648610;648611;648612;648613;648614;648615;648616;648617;648618;648619;648620;648621;648622;648623;648624;994873;994874;994875;994876;994877;994878;994879;994880;994881;994882;994883;994884;994885;994886;994887;994888;994889;994890;994891;994892;994893;994894;994895;994896;994897;994898;994899;…	257392;648599;994897;1014689			P41250	SYG_HUMAN	Glycine--tRNA ligase OS=Homo sapiens (Human) GN=GARS PE=1 SV=3	0	0.942	0.974	ok		19903	13738			19153			21955	20488
188	D2HBR7	D2HBR7;G1L1C8	D2HBR7;G1L1C8	Proteasome subunit beta type	tr|D2HBR7|D2HBR7_AILME Proteasome subunit beta type OS=Ailuropoda melanoleuca (Giant panda) GN=PANDA_007986 PE=3 SV=1;tr|G1L1C8|G1L1C8_AILME Proteasome subunit beta type OS=Ailuropoda melanoleuca (Giant panda) GN=PSMB4 PE=3 SV=1	---	3;3	3;3	3;3	2	3	3	3	15.8	28.757	260	260;264	0	17.498				231	2710;7133;7232	True;True;True	2891;7746;7850	176014;176015;176016;176017;176018;176019;176020;176021;176022;176023;176024;176025;176026;176027;176028;176029;176030;176031;176032;176033;176034;176035;176036;485929;485930;485931;485932;485933;485934;485935;485936;485937;485938;485939;485940;485941;485942;485943;485944;485945;485946;485947;485948;485949;485950;485951;485952;485953;485954;485955;485956;485957;485958;485959;485960;485961;485962;…	324353;324354;324355;324356;324357;324358;324359;324360;324361;324362;324363;324364;324365;324366;324367;324368;324369;324370;324371;324372;324373;324374;324375;324376;324377;324378;886475;886476;886477;886478;886479;886480;886481;886482;886483;886484;886485;886486;886487;886488;886489;886490;886491;886492;886493;886494;886495;886496;886497;886498;886499;886500;886501;886502;886503;886504;886505;…	324360;886482;896098			P28070	PSB4_HUMAN	Proteasome subunit beta type-4 OS=Homo sapiens (Human) GN=PSMB4 PE=1 SV=4	1.9e-124	0.927	0.962	ok	65395	67990			64884	74546			69370	54696
189	D2HBS2	D2HBS2;G1L1M2	D2HBS2;G1L1M2	Putative uncharacterized protein	tr|D2HBS2|D2HBS2_AILME Putative uncharacterized protein OS=Ailuropoda melanoleuca (Giant panda) GN=PANDA_007991 PE=4 SV=1;tr|G1L1M2|G1L1M2_AILME Uncharacterized protein OS=Ailuropoda melanoleuca (Giant panda) GN=PSMD4 PE=4 SV=1	---	3;3	3;3	3;3	2	3	3	3	12	39.695	368	368;377	0	6.8431				232	4032;5665;5863	True;True;True	4296;6092;6301	263653;263654;263655;263656;263657;263658;263659;263660;263661;263662;263663;263664;263665;263666;263667;263668;263669;263670;263671;263672;263673;387763;405628	480736;480737;480738;480739;480740;480741;480742;480743;480744;480745;480746;480747;480748;480749;480750;480751;480752;480753;480754;480755;480756;709393;744170	480736;709393;744170			P55036	PSMD4_HUMAN	26S proteasome non-ATPase regulatory subunit 4 OS=Homo sapiens (Human) GN=PSMD4 PE=1 SV=1	9.2e-154	0.992	1	not checked
190	G1L233	G1L233;D2HBS4	G1L233;D2HBS4	Uncharacterized protein	tr|G1L233|G1L233_AILME Uncharacterized protein OS=Ailuropoda melanoleuca (Giant panda) GN=TMOD4 PE=4 SV=1;tr|D2HBS4|D2HBS4_AILME Uncharacterized protein OS=Ailuropoda melanoleuca (Giant panda) GN=TMOD4 PE=4 SV=1	TMOD4	13;13	13;13	12;12	2	13	13	12	46.8	39.156	344	344;345	0	142.53				233	1122;1305;2177;2265;2574;4806;6567;7246;7575;7588;7838;9944;10021	True;True;True;True;True;True;True;True;True;True;True;True;True	1197;1387;2323;2420;2749;5157;7143;7864;8220;8233;8506;10753;10836	71435;71436;71437;71438;71439;71440;71441;71442;71443;71444;71445;71446;71447;71448;71449;71450;71451;71452;71453;71454;71455;71456;71457;71458;71459;71460;71461;71462;71463;71464;71465;71466;71467;71468;71469;71470;71471;71472;71473;71474;71475;71476;71477;71478;71479;71480;71481;71482;71483;71484;71485;71486;71487;71488;71489;71490;71491;71492;71493;71494;71495;71496;71497;71498;71499;71500;715…	122417;122418;122419;122420;122421;122422;122423;122424;122425;122426;122427;122428;122429;122430;122431;122432;122433;122434;122435;122436;122437;122438;122439;122440;122441;122442;122443;122444;122445;122446;122447;122448;122449;122450;122451;122452;122453;122454;122455;122456;122457;122458;122459;122460;122461;122462;122463;122464;122465;122466;122467;122468;122469;122470;122471;122472;122473;…	122445;141223;260539;275123;312117;587175;838028;896874;930041;930831;954300;1250226;1256993			Q9NZQ9	TMOD4_HUMAN	Tropomodulin-4 OS=Homo sapiens (Human) GN=TMOD4 PE=2 SV=1	4.5e-145	0.959	0.991	ok	435500	320350	578510	647920	499390	476410	457750	407170	541080	494320	383400
191	D2HC07	D2HC07;G1LRE4	D2HC07;G1LRE4	Putative uncharacterized protein	tr|D2HC07|D2HC07_AILME Putative uncharacterized protein OS=Ailuropoda melanoleuca (Giant panda) GN=PANDA_008095 PE=4 SV=1;tr|G1LRE4|G1LRE4_AILME Uncharacterized protein OS=Ailuropoda melanoleuca (Giant panda) GN=LRRC47 PE=4 SV=1	---	2;2	2;2	2;2	2	2	2	2	6.2	48.202	435	435;458	0.0015015	6.3415				234	2140;8102	True;True	2282;8784	139905;139906;139907;139908;139909;139910;139911;139912;139913;139914;139915;546366;546367;546368;546369;546370;546371;546372;546373;546374;546375;546376;546377;546378;546379;546380;546381;546382	257575;257576;257577;257578;257579;257580;257581;257582;257583;257584;257585;990166;990167;990168;990169;990170;990171;990172;990173;990174;990175;990176;990177;990178;990179;990180;990181;990182	257584;990172			Q8N1G4	LRC47_HUMAN	Leucine-rich repeat-containing protein 47 OS=Homo sapiens (Human) GN=LRRC47 PE=1 SV=1	4.5e-119	0.811	0.938	ok								32673
192	D2HC22	D2HC22;G1L9G2	D2HC22;G1L9G2	Putative uncharacterized protein	tr|D2HC22|D2HC22_AILME Putative uncharacterized protein OS=Ailuropoda melanoleuca (Giant panda) GN=PANDA_008113 PE=4 SV=1;tr|G1L9G2|G1L9G2_AILME Uncharacterized protein OS=Ailuropoda melanoleuca (Giant panda) GN=AMACR PE=4 SV=1	---	11;11	11;11	11;11	2	11	11	11	35.4	41.266	376	376;381	0	78.783				235	1389;2438;3312;3341;5474;5715;5795;7692;8047;8115;8635	True;True;True;True;True;True;True;True;True;True;True	1476;2604;3532;3561;5875;6142;6230;8345;8726;8797;8798;9353	89892;89893;89894;89895;89896;89897;89898;89899;89900;89901;89902;157338;157339;157340;157341;157342;157343;157344;157345;157346;157347;157348;157349;157350;157351;157352;157353;157354;157355;157356;157357;157358;157359;157360;157361;157362;157363;157364;157365;157366;157367;157368;210463;210464;211450;211451;211452;211453;211454;211455;211456;211457;211458;211459;211460;211461;211462;211463;2114…	158556;158557;158558;158559;158560;158561;158562;158563;158564;158565;158566;288384;288385;288386;288387;288388;288389;288390;288391;288392;288393;288394;288395;288396;288397;288398;288399;288400;288401;288402;288403;288404;288405;288406;288407;288408;288409;288410;288411;288412;288413;288414;288415;288416;383395;383396;384616;384617;384618;384619;384620;384621;384622;384623;384624;384625;384626;…	158562;288405;383396;384642;686709;717424;731419;939980;983440;991301;1057871	160	85	Q9UHK6	AMACR_HUMAN	Alpha-methylacyl-CoA racemase OS=Homo sapiens (Human) GN=AMACR PE=1 SV=2	1.8e-157	0.806	0.947	not checked	428650	498500	793740	804490	452350	302170	663530	549660	451520	430140	552950
193	D2HC39	D2HC39	D2HC39	Uncharacterized protein	tr|D2HC39|D2HC39_AILME Uncharacterized protein OS=Ailuropoda melanoleuca (Giant panda) GN=PRDX1 PE=4 SV=1	PRDX1	14	13	11	1	14	13	11	73.4	22.124	199	199	0	93.828				236	121;761;1423;3152;3581;3984;4727;4783;5559;6014;6990;7034;7970;8235	True;True;True;True;True;True;True;True;True;True;True;False;True;True	130;819;820;1511;3358;3812;4247;5066;5133;5977;6464;7596;7642;8644;8923	7237;7238;7239;7240;7241;7242;7243;7244;7245;7246;7247;7248;7249;7250;7251;7252;7253;7254;7255;7256;7257;7258;7259;7260;7261;7262;7263;7264;7265;7266;7267;7268;7269;7270;7271;7272;7273;7274;7275;7276;7277;7278;7279;7280;7281;7282;7283;49937;49938;49939;49940;49941;49942;49943;49944;49945;49946;49947;49948;49949;49950;49951;49952;49953;49954;49955;49956;49957;49958;49959;49960;49961;49962;49963;49…	12931;12932;12933;12934;12935;12936;12937;12938;12939;12940;12941;12942;12943;12944;12945;12946;12947;12948;12949;12950;12951;12952;12953;12954;12955;12956;12957;12958;12959;12960;12961;12962;12963;12964;12965;12966;12967;12968;12969;12970;12971;12972;12973;12974;12975;12976;12977;12978;12979;12980;12981;12982;12983;12984;12985;12986;12987;12988;12989;12990;12991;12992;12993;12994;12995;12996;129…	12964;85637;164454;363895;427095;476728;577790;585497;700083;762487;872179;876124;964337;1002900	161	21	Q06830	PRDX1_HUMAN	Peroxiredoxin-1 OS=Homo sapiens (Human) GN=PRDX1 PE=1 SV=1	5e-104	0.99	1	ok	1015500	1144500	1606200	1688600	830700	782770	908310	1563000	49099	80714	1124400
194	D2HC73	D2HC73	D2HC73	Transgelin	tr|D2HC73|D2HC73_AILME Transgelin OS=Ailuropoda melanoleuca (Giant panda) GN=TAGLN PE=3 SV=1	TAGLN	5	5	5	1	5	5	5	32.8	22.609	201	201	0	12.116				238	1227;5970;6004;7100;8106	True;True;True;True;True	1307;6420;6454;7709;8788	76899;76900;413834;413835;416118;416119;484697;484698;546911;546912	132704;132705;757525;757526;762028;762029;884456;884457;991169;991170	132704;757525;762028;884456;991170			Q01995	TAGL_HUMAN	Transgelin OS=Homo sapiens (Human) GN=TAGLN PE=1 SV=4	3e-89	0.97	0.99	ok			44486
195	D2HC75	D2HC75	D2HC75	Uncharacterized protein	tr|D2HC75|D2HC75_AILME Uncharacterized protein OS=Ailuropoda melanoleuca (Giant panda) GN=PAFAH1B2 PE=4 SV=1	PAFAH1B2	2	2	2	1	2	2	2	12.2	25.569	229	229	0.0014903	6.1527				239	2080;4078	True;True	2218;4345	137117;269935;269936;269937;269938;269939;269940;269941;269942;269943;269944;269945;269946;269947;269948;269949;269950	252545;491946;491947;491948;491949;491950;491951;491952;491953;491954;491955;491956;491957;491958;491959;491960;491961	252545;491955			P68402	PA1B2_HUMAN	Platelet-activating factor acetylhydrolase IB subunit beta OS=Homo sapiens (Human) GN=PAFAH1B2 PE=1 SV=1	1e-117	1	1	ok
196	D2HC77	D2HC77	D2HC77	Apolipoprotein A-I	sp|D2HC77|APOA1_AILME Apolipoprotein A-I OS=Ailuropoda melanoleuca (Giant panda) GN=APOA1 PE=2 SV=1	APOA1	24	24	22	1	24	24	22	70.7	30.208	266	266	0	323.31				240	416;662;715;1364;1687;1792;1909;2239;5437;5664;5690;5691;5762;5763;5821;5822;6740;6765;6945;6996;7038;8670;9042;9343	True;True;True;True;True;True;True;True;True;True;True;True;True;True;True;True;True;True;True;True;True;True;True;True	450;715;770;1450;1797;1909;2035;2391;5838;6091;6117;6118;6196;6197;6256;6257;7335;7360;7547;7548;7602;7646;9396;9791;10111	30563;30564;30565;30566;30567;30568;30569;30570;30571;30572;30573;30574;30575;30576;30577;30578;30579;30580;30581;30582;30583;30584;30585;30586;30587;30588;30589;30590;30591;30592;30593;30594;30595;30596;30597;30598;30599;30600;30601;30602;30603;30604;30605;30606;30607;30608;30609;30610;30611;30612;30613;30614;30615;30616;30617;30618;30619;30620;30621;30622;30623;30624;30625;30626;30627;30628;306…	53688;53689;53690;53691;53692;53693;53694;53695;53696;53697;53698;53699;53700;53701;53702;53703;53704;53705;53706;53707;53708;53709;53710;53711;53712;53713;53714;53715;53716;53717;53718;53719;53720;53721;53722;53723;53724;53725;53726;53727;53728;53729;53730;53731;53732;53733;53734;53735;53736;53737;53738;53739;53740;53741;53742;53743;53744;53745;53746;53747;53748;53749;53750;53751;53752;53753;537…	53737;77826;82752;146465;205572;214290;225230;268275;680766;709230;714083;714128;728231;728358;734052;734318;853169;854271;865326;872728;876539;1069876;1140940;1180907	162	109	P02647	APOA1_HUMAN	Apolipoprotein A-I OS=Homo sapiens (Human) GN=APOA1 PE=1 SV=1	9.1e-71	0.85	0.966	ok	21981000	21980000	11117000	11168000	14208000	14327000	11299000	10689000	16185000	15440000	23979000
197	D2HCA2	D2HCA2;G1LHM6	D2HCA2;G1LHM6	Putative uncharacterized protein	tr|D2HCA2|D2HCA2_AILME Putative uncharacterized protein OS=Ailuropoda melanoleuca (Giant panda) GN=PANDA_008202 PE=4 SV=1;tr|G1LHM6|G1LHM6_AILME Uncharacterized protein OS=Ailuropoda melanoleuca (Giant panda) GN=GC PE=4 SV=1	---	7;7	7;7	6;6	2	7	7	6	16.3	47.296	423	423;475	0	51.855				241	359;2142;3820;4136;7390;8221;9306	True;True;True;True;True;True;True	385;2284;4068;4407;8018;8908;10074	26877;26878;26879;26880;26881;26882;26883;26884;26885;26886;26887;26888;26889;26890;26891;26892;26893;26894;26895;26896;26897;26898;26899;26900;26901;26902;26903;26904;26905;26906;26907;26908;26909;26910;26911;26912;26913;26914;26915;26916;26917;26918;26919;26920;26921;26922;26923;139954;139955;139956;139957;248870;248871;248872;248873;248874;248875;248876;248877;248878;248879;248880;248881;24888…	47604;47605;47606;47607;47608;47609;47610;47611;47612;47613;47614;47615;47616;47617;47618;47619;47620;47621;47622;47623;47624;47625;47626;47627;47628;47629;47630;47631;47632;47633;47634;47635;47636;47637;47638;47639;47640;47641;47642;47643;47644;47645;47646;47647;47648;47649;47650;47651;47652;47653;47654;47655;47656;47657;47658;47659;47660;47661;47662;47663;47664;47665;47666;47667;47668;47669;476…	47605;257664;454176;499826;912143;1001285;1175513			P02774	VTDB_HUMAN	Vitamin D-binding protein OS=Homo sapiens (Human) GN=GC PE=1 SV=1	4e-181	0.849	0.962	ok	491240	444050	485840	302090	198490	206990	248440	229260	287360	268620	403420
198	D2HCA8	D2HCA8;G1M7J6	D2HCA8;G1M7J6	Putative uncharacterized protein	tr|D2HCA8|D2HCA8_AILME Putative uncharacterized protein OS=Ailuropoda melanoleuca (Giant panda) GN=PANDA_008209 PE=4 SV=1;tr|G1M7J6|G1M7J6_AILME Uncharacterized protein OS=Ailuropoda melanoleuca (Giant panda) GN=HSPG2 PE=4 SV=1	---	13;13	13;13	13;13	2	13	13	13	4.5	466.98	4388	4388;4396	0	68.674				242	233;310;1955;2517;3688;3774;5044;5097;7122;7610;7856;9607;9838	True;True;True;True;True;True;True;True;True;True;True;True;True	246;333;2085;2687;3927;4021;5417;5476;7735;8258;8524;10396;10644	13050;13051;13052;13053;13054;13055;13056;13057;23810;23811;23812;23813;23814;23815;125534;164583;239503;239504;239505;239506;239507;239508;239509;239510;239511;239512;239513;239514;239515;239516;239517;239518;246233;246234;246235;246236;345238;345239;345240;345241;345242;345243;345244;345245;345246;345247;345248;345249;345250;345251;345252;345253;345254;345255;345256;345257;345258;345259;345260;…	22397;22398;22399;22400;22401;22402;22403;22404;42787;42788;42789;42790;42791;42792;229202;303303;438116;438117;438118;438119;438120;438121;438122;438123;438124;438125;438126;438127;438128;438129;438130;438131;450064;450065;450066;450067;632621;632622;632623;632624;632625;632626;632627;632628;632629;632630;632631;632632;632633;632634;632635;632636;632637;632638;632639;632640;632641;632642;632643;…	22399;42788;229202;303303;438116;450067;632629;638424;885789;932696;955674;1213192;1242464			P98160	PGBM_HUMAN	Basement membrane-specific heparan sulfate proteoglycan core protein OS=Homo sapiens (Human) GN=HSPG2 PE=1 SV=4	0	0.9	0.967	not checked	27937	25226	82716	83210	59077	41879	35235	59942	63928	52398
199	D2HCF4	D2HCF4;G1M832	D2HCF4;G1M832	Putative uncharacterized protein	tr|D2HCF4|D2HCF4_AILME Putative uncharacterized protein OS=Ailuropoda melanoleuca (Giant panda) GN=PANDA_008265 PE=3 SV=1;tr|G1M832|G1M832_AILME Uncharacterized protein OS=Ailuropoda melanoleuca (Giant panda) GN=LOC100478407 PE=3 SV=1	---	6;6	6;6	6;6	2	6	6	6	48.6	20.345	185	185;213	0	146.62				243	2750;2952;5032;6096;8108;8675	True;True;True;True;True;True	2933;3149;5405;6548;6549;8790;9401	177277;177278;177279;177280;177281;177282;177283;177284;177285;177286;177287;177288;177289;177290;177291;177292;177293;177294;177295;177296;177297;177298;177299;177300;177301;177302;177303;177304;177305;177306;177307;177308;177309;177310;177311;177312;177313;177314;177315;177316;177317;177318;177319;177320;177321;177322;177323;177324;177325;177326;177327;177328;177329;177330;177331;177332;177333;…	326296;326297;326298;326299;326300;326301;326302;326303;326304;326305;326306;326307;326308;326309;326310;326311;326312;326313;326314;326315;326316;326317;326318;326319;326320;326321;326322;326323;326324;326325;326326;326327;326328;326329;326330;326331;326332;326333;326334;326335;326336;326337;326338;326339;326340;326341;326342;326343;326344;326345;326346;326347;326348;326349;326350;326351;326352;…	326425;347119;631890;770170;991229;1070036	163;164	47;52	P48047	ATPO_HUMAN	ATP synthase subunit O, mitochondrial OS=Homo sapiens (Human) GN=ATP5O PE=1 SV=1	7.9e-88	0.859	0.989	ok	872830	950430	975480	1223300	417060	394390	1477400	1554200	98532	94700	760180
200	D2HCF9	D2HCF9;G1M8N1	D2HCF9;G1M8N1	Putative uncharacterized protein	tr|D2HCF9|D2HCF9_AILME Putative uncharacterized protein OS=Ailuropoda melanoleuca (Giant panda) GN=PANDA_008270 PE=3 SV=1;tr|G1M8N1|G1M8N1_AILME Uncharacterized protein OS=Ailuropoda melanoleuca (Giant panda) GN=GART PE=3 SV=1	---	4;4	4;4	4;4	2	4	4	4	5	108.24	1010	1010;1040	0.0014556	5.5901				244	353;3438;9176;9179	True;True;True;True	378;3665;9933;9936	26603;219066;219067;219068;219069;219070;219071;219072;219073;219074;219075;219076;637751;637752;637854;637855	47243;399958;399959;399960;399961;399962;399963;399964;399965;399966;399967;399968;1160220;1160221;1160324;1160325	47243;399968;1160221;1160325			P22102	PUR2_HUMAN	Trifunctional purine biosynthetic protein adenosine-3 OS=Homo sapiens (Human) GN=GART PE=1 SV=1	0	0.914	0.977	ok
201	G1M9T8	G1M9T8;D2HCK7	G1M9T8;D2HCK7	Uncharacterized protein	tr|G1M9T8|G1M9T8_AILME Uncharacterized protein OS=Ailuropoda melanoleuca (Giant panda) GN=FERMT2 PE=4 SV=1;tr|D2HCK7|D2HCK7_AILME Uncharacterized protein OS=Ailuropoda melanoleuca (Giant panda) GN=FERMT2 PE=4 SV=1	FERMT2	4;4	4;4	4;4	2	4	4	4	9.3	77.873	680	680;687	0.0015038	6.4212				245	1851;2597;5479;8488	True;True;True;True	1971;2772;5880;9195	119122;170159;170160;170161;170162;170163;170164;170165;374415;569860;569861;569862;569863;569864	217296;314469;314470;314471;314472;314473;314474;314475;687071;1029221;1029222;1029223;1029224;1029225	217296;314471;687071;1029221			Q96AC1	FERM2_HUMAN	Fermitin family homolog 2 OS=Homo sapiens (Human) GN=FERMT2 PE=1 SV=1	0	0.999	1	ok					15760					13792
202	D2HCU1	D2HCU1;G1MJ09	D2HCU1;G1MJ09	Putative uncharacterized protein	tr|D2HCU1|D2HCU1_AILME Putative uncharacterized protein OS=Ailuropoda melanoleuca (Giant panda) GN=PANDA_008433 PE=4 SV=1;tr|G1MJ09|G1MJ09_AILME Uncharacterized protein OS=Ailuropoda melanoleuca (Giant panda) GN=DUSP3 PE=4 SV=1	---	2;2	2;2	2;2	2	2	2	2	17.6	15.906	142	142;153	0.0027435	4.3403				247	19;5236	True;True	20;5624	862;863;864;865;866;867;868;869;870;871;872;873;874;875;876;877;878;879;880;881;882;883;884;885;886;887;888;889;890;356307;356308	1200;1201;1202;1203;1204;1205;1206;1207;1208;1209;1210;1211;1212;1213;1214;1215;1216;1217;1218;1219;1220;1221;1222;1223;1224;1225;1226;1227;1228;1229;652386;652387	1212;652387			P51452	DUS3_HUMAN	Dual specificity protein phosphatase 3 OS=Homo sapiens (Human) GN=DUSP3 PE=1 SV=1	6.4e-65	0.979	1	ok			28093	30359	36436	33605	42976	42871			38238
203	D2HCY1	D2HCY1;G1M4G0	D2HCY1;G1M4G0;D2H627;D2H8H7	Putative uncharacterized protein	tr|D2HCY1|D2HCY1_AILME Putative uncharacterized protein OS=Ailuropoda melanoleuca (Giant panda) GN=PANDA_008486 PE=4 SV=1;tr|G1M4G0|G1M4G0_AILME Isocitrate dehydrogenase [NADP] OS=Ailuropoda melanoleuca (Giant panda) GN=IDH2 PE=3 SV=1	---	25;25;1;1	25;25;1;1	25;25;1;1	4	25	25	25	49	46.444	412	412;421;185;414	0	323.31				249	764;960;1314;1522;2031;2456;2605;3128;3326;4082;5008;5320;5339;6008;6009;6465;6862;6877;7886;8243;8649;8718;9736;9856;9857	True;True;True;True;True;True;True;True;True;True;True;True;True;True;True;True;True;True;True;True;True;True;True;True;True	823;1029;1396;1624;2166;2623;2781;3334;3546;4349;5380;5715;5716;5735;6458;6459;7029;7461;7476;8554;8931;9368;9369;9370;9444;9445;10531;10663;10664	50596;50597;50598;50599;50600;50601;50602;50603;50604;50605;50606;50607;50608;50609;50610;50611;50612;50613;50614;50615;50616;50617;50618;50619;50620;50621;50622;50623;50624;50625;50626;50627;50628;50629;50630;50631;50632;50633;50634;50635;50636;50637;50638;50639;50640;50641;50642;50643;50644;50645;50646;50647;50648;50649;50650;50651;50652;50653;50654;50655;50656;50657;50658;50659;50660;50661;631…	86983;86984;86985;86986;86987;86988;86989;86990;86991;86992;86993;86994;86995;86996;86997;86998;86999;87000;87001;87002;87003;87004;87005;87006;87007;87008;87009;87010;87011;87012;87013;87014;87015;87016;87017;87018;87019;87020;87021;87022;87023;87024;87025;87026;87027;87028;87029;87030;87031;87032;87033;87034;87035;87036;87037;87038;87039;87040;87041;87042;87043;87044;87045;87046;87047;87048;870…	87035;107545;141712;187345;245433;290905;315359;361581;384089;492317;629272;667504;669040;762047;762134;816636;857987;858914;957444;1004957;1060759;1092726;1230029;1243186;1243233	165;166;167;168	14;19;254;372	P48735	IDHP_HUMAN	Isocitrate dehydrogenase [NADP], mitochondrial OS=Homo sapiens (Human) GN=IDH2 PE=1 SV=2	0	0.959	0.998	ok	3769800	3568600	5459700	5308800	4580000	4811700	4669400	4370200	4010700	3721700	4776400
204	D2HD33	D2HD33	D2HD33	Uncharacterized protein	tr|D2HD33|D2HD33_AILME Uncharacterized protein OS=Ailuropoda melanoleuca (Giant panda) GN=ATP5H PE=4 SV=1	ATP5H	7	7	7	1	7	7	7	43.5	18.633	161	161	0	61.027				250	312;313;690;3890;4960;6464;7461	True;True;True;True;True;True;True	335;336;743;4146;5329;7028;8099	23824;23825;23826;23827;23828;23829;23830;23831;23832;23833;23834;23835;23836;23837;23838;23839;23840;23841;23842;23843;23844;23845;23846;23847;23848;23849;23850;23851;23852;23853;23854;23855;23856;46407;46408;46409;254926;254927;254928;254929;254930;254931;254932;254933;254934;254935;254936;254937;254938;254939;254940;254941;254942;254943;254944;336548;336549;336550;336551;336552;336553;336554;3…	42801;42802;42803;42804;42805;42806;42807;42808;42809;42810;42811;42812;42813;42814;42815;42816;42817;42818;42819;42820;42821;42822;42823;42824;42825;42826;42827;42828;42829;42830;42831;42832;42833;42834;42835;42836;42837;42838;42839;42840;42841;42842;80158;80159;80160;465444;465445;465446;465447;465448;465449;465450;465451;465452;465453;465454;465455;465456;465457;465458;465459;465460;465461;465…	42805;42816;80159;465446;606714;816529;919078			O75947	ATP5H_HUMAN	ATP synthase subunit d, mitochondrial OS=Homo sapiens (Human) GN=ATP5H PE=1 SV=3	1e-66	0.882	0.981	ok	233100	327450	762220	734180			823280	906210			280550
205	D2HD52	D2HD52	D2HD52	Histone H3	tr|D2HD52|D2HD52_AILME Histone H3 OS=Ailuropoda melanoleuca (Giant panda) GN=LOC100470602 PE=3 SV=1	LOC100470602	4	4	1	1	4	4	1	40.4	15.328	136	136	0	13.287				251	1965;2717;7934;10026	True;True;True;True	2096;2898;8608;10841	125914;125915;125916;125917;125918;125919;125920;125921;125922;125923;125924;125925;125926;125927;125928;125929;125930;125931;125932;125933;125934;125935;125936;125937;125938;125939;125940;125941;125942;125943;125944;176285;176286;176287;176288;176289;176290;176291;176292;176293;176294;532126;532127;532128;532129;532130;532131;532132;532133;532134;532135;532136;532137;532138;532139;532140;532141;…	229715;229716;229717;229718;229719;229720;229721;229722;229723;229724;229725;229726;229727;229728;229729;229730;229731;229732;229733;229734;229735;229736;229737;229738;229739;229740;229741;229742;229743;229744;229745;229746;229747;229748;229749;229750;229751;229752;229753;229754;229755;324722;324723;324724;324725;324726;324727;324728;324729;324730;324731;324732;324733;961547;961548;961549;961550;…	229738;324733;961647;1257201			P84243	H33_HUMAN	Histone H3.3 OS=Homo sapiens (Human) GN=H3F3A PE=1 SV=2	3.2e-57	1	1	ok	61971	153020	234250	217690	26981		87297	207250			81675
206	D2HDS3	D2HDS3;G1L5H8	D2HDS3;G1L5H8	Putative uncharacterized protein	tr|D2HDS3|D2HDS3_AILME Putative uncharacterized protein OS=Ailuropoda melanoleuca (Giant panda) GN=PANDA_008874 PE=3 SV=1;tr|G1L5H8|G1L5H8_AILME Uncharacterized protein OS=Ailuropoda melanoleuca (Giant panda) GN=LOC100464994 PE=3 SV=1	---	5;5	5;5	5;5	2	5	5	5	15.1	37.27	345	345;385	0	21.925				252	949;2490;6458;7127;9429	True;True;True;True;True	1018;2657;7022;7740;10199	62740;62741;62742;62743;62744;62745;62746;62747;62748;62749;62750;62751;62752;62753;62754;62755;62756;62757;62758;62759;62760;62761;62762;62763;62764;62765;62766;62767;62768;62769;62770;62771;62772;62773;62774;62775;62776;62777;62778;62779;62780;160644;160645;160646;160647;160648;160649;160650;160651;446147;446148;446149;446150;446151;446152;446153;446154;446155;446156;446157;446158;446159;446160…	106810;106811;106812;106813;106814;106815;106816;106817;106818;106819;106820;106821;106822;106823;106824;106825;106826;106827;106828;106829;106830;106831;106832;106833;106834;106835;106836;106837;106838;106839;106840;106841;106842;106843;106844;106845;106846;106847;106848;106849;106850;106851;106852;106853;106854;106855;106856;106857;106858;106859;106860;106861;106862;106863;294782;294783;294784;…	106847;294788;816315;886295;1190657			P07339	CATD_HUMAN	Cathepsin D OS=Homo sapiens (Human) GN=CTSD PE=1 SV=1	5.4e-163	0.876	0.954	ok	103010	102170	73898	67521	112580	117150	64827	56976	103280	95019
207	D2HDS4	D2HDS4;G1L5K1	D2HDS4;G1L5K1	Putative uncharacterized protein	tr|D2HDS4|D2HDS4_AILME Putative uncharacterized protein OS=Ailuropoda melanoleuca (Giant panda) GN=PANDA_008876 PE=4 SV=1;tr|G1L5K1|G1L5K1_AILME Uncharacterized protein OS=Ailuropoda melanoleuca (Giant panda) GN=TNNI2 PE=4 SV=1	---	9;9	9;9	8;8	2	9	9	8	47.8	20.964	178	178;200	0	182.26				253	2058;2284;3821;3822;4580;6242;7070;7118;7987	True;True;True;True;True;True;True;True;True	2194;2195;2440;2441;4069;4070;4071;4899;6769;6770;6771;7679;7730;7731;8662;8663	134855;134856;134857;134858;134859;134860;134861;134862;134863;134864;134865;134866;134867;134868;134869;134870;134871;134872;134873;134874;134875;134876;134877;134878;134879;134880;134881;134882;134883;134884;134885;134886;134887;134888;134889;134890;134891;134892;134893;134894;134895;134896;134897;134898;134899;134900;134901;134902;134903;134904;134905;134906;134907;134908;134909;134910;134911;…	248268;248269;248270;248271;248272;248273;248274;248275;248276;248277;248278;248279;248280;248281;248282;248283;248284;248285;248286;248287;248288;248289;248290;248291;248292;248293;248294;248295;248296;248297;248298;248299;248300;248301;248302;248303;248304;248305;248306;248307;248308;248309;248310;248311;248312;248313;248314;248315;248316;248317;248318;248319;248320;248321;248322;248323;248324;…	248300;275528;454270;454332;560466;793360;881265;885532;965461	169;170;171;172;173	18;54;78;92;118	P48788	TNNI2_HUMAN	Troponin I, fast skeletal muscle OS=Homo sapiens (Human) GN=TNNI2 PE=1 SV=2	8.6e-63	0.949	1	ok	2372100	2522200	2183500	1872400	1591000	1508000	3953100	2961900	420630	430350	2744200
208	P18970	P18970;D2HDV4	P18970;D2HDV4	Hemoglobin subunit alpha	sp|P18970|HBA_AILME Hemoglobin subunit alpha OS=Ailuropoda melanoleuca (Giant panda) GN=HBA PE=1 SV=2;tr|D2HDV4|D2HDV4_AILME Hemoglobin subunit alpha OS=Ailuropoda melanoleuca (Giant panda) GN=HBA PE=3 SV=1	HBA	9;9	3;3	3;3	2	9	3	3	78.2	15.219	142	142;142	0.0066934	4.1615				254	2530;4827;5771;8145;8586;8617;8766;8767;9164	False;True;False;False;False;True;False;True;False	2702;5178;6205;8829;9300;9335;9500;9501;9920	166199;166200;166201;166202;166203;166204;166205;166206;166207;166208;166209;166210;166211;166212;166213;166214;166215;166216;166217;166218;166219;166220;166221;166222;166223;166224;166225;166226;166227;166228;166229;166230;166231;166232;166233;166234;166235;166236;166237;166238;166239;166240;166241;166242;166243;166244;166245;166246;166247;166248;166249;166250;166251;166252;166253;166254;166255;…	307578;307579;307580;307581;307582;307583;307584;307585;307586;307587;307588;307589;307590;307591;307592;307593;307594;307595;307596;307597;307598;307599;307600;307601;307602;307603;307604;307605;307606;307607;307608;307609;307610;307611;307612;307613;307614;307615;307616;307617;307618;307619;307620;307621;307622;307623;307624;307625;307626;307627;307628;307629;307630;307631;307632;307633;307634;…				P69905	HBA_HUMAN	Hemoglobin subunit alpha OS=Homo sapiens (Human) GN=HBA1 PE=1 SV=2	9.7e-56	0.866	0.965	ok			27702
209	D2HDZ9	D2HDZ9;G1LPD0	D2HDZ9;G1LPD0	Putative uncharacterized protein	tr|D2HDZ9|D2HDZ9_AILME Putative uncharacterized protein OS=Ailuropoda melanoleuca (Giant panda) GN=PANDA_008978 PE=3 SV=1;tr|G1LPD0|G1LPD0_AILME Uncharacterized protein OS=Ailuropoda melanoleuca (Giant panda) GN=HAGH PE=3 SV=1	---	8;8	8;8	8;8	2	8	8	8	41.2	31.391	284	284;308	0	74.174				255	474;2818;3721;5926;8563;9493;9640;10039	True;True;True;True;True;True;True;True	510;3007;3967;6374;9276;10265;10429;10856	33641;33642;33643;33644;33645;33646;33647;33648;33649;33650;33651;33652;33653;33654;33655;33656;33657;33658;33659;33660;33661;33662;33663;33664;33665;33666;33667;33668;33669;33670;33671;33672;33673;33674;33675;33676;33677;33678;33679;33680;33681;33682;33683;33684;33685;33686;33687;33688;33689;182923;182924;182925;182926;182927;242563;242564;242565;242566;242567;242568;242569;242570;242571;242572;…	58670;58671;58672;58673;58674;58675;58676;58677;58678;58679;58680;58681;58682;58683;58684;58685;58686;58687;58688;58689;58690;58691;58692;58693;58694;58695;58696;58697;58698;58699;58700;58701;58702;58703;58704;58705;58706;58707;58708;58709;58710;58711;58712;58713;58714;58715;58716;58717;58718;58719;58720;58721;58722;58723;58724;58725;58726;58727;58728;58729;58730;58731;58732;58733;58734;58735;587…	58732;335778;443169;753499;1048715;1196416;1216154;1259340			Q16775	GLO2_HUMAN	Hydroxyacylglutathione hydrolase, mitochondrial OS=Homo sapiens (Human) GN=HAGH PE=1 SV=2	2.6e-125	0.877	0.979	ok	218370	191160	200780	206730	260670	309330	150430	141320	201900	203480	192410
210	D2HE03	D2HE03	D2HE03	Uncharacterized protein	tr|D2HE03|D2HE03_AILME Uncharacterized protein OS=Ailuropoda melanoleuca (Giant panda) GN=NDUFB10 PE=4 SV=1	NDUFB10	8	8	8	1	8	8	8	47.7	21.005	176	176	0	138.73				256	236;1676;2070;6777;7392;8399;8768;9915	True;True;True;True;True;True;True;True	249;1786;2208;7372;8020;9098;9502;10724	13124;13125;13126;13127;13128;13129;13130;13131;13132;13133;13134;13135;13136;13137;13138;13139;13140;13141;13142;13143;13144;13145;13146;13147;13148;13149;13150;13151;13152;13153;13154;13155;13156;13157;13158;13159;13160;13161;13162;13163;13164;13165;13166;13167;13168;13169;13170;13171;13172;13173;13174;13175;13176;13177;13178;111541;111542;111543;111544;111545;111546;111547;111548;111549;111550…	22508;22509;22510;22511;22512;22513;22514;22515;22516;22517;22518;22519;22520;22521;22522;22523;22524;22525;22526;22527;22528;22529;22530;22531;22532;22533;22534;22535;22536;22537;22538;22539;22540;22541;22542;22543;22544;22545;22546;22547;22548;22549;22550;22551;22552;22553;22554;22555;22556;22557;22558;22559;22560;22561;22562;22563;22564;22565;22566;22567;22568;22569;22570;22571;22572;22573;225…	22586;204906;252158;854678;912244;1019742;1099317;1249140			O96000	NDUBA_HUMAN	NADH dehydrogenase [ubiquinone] 1 beta subcomplex subunit 10 OS=Homo sapiens (Human) GN=NDUFB10 PE=1 SV=3	2.8e-54	0.818	0.938	ok	719840	702070	686300	726100	565230	536870	557990	513030	179580	111380	792520
211	D2HE13	D2HE13;G1M0I2	D2HE13;G1M0I2	Putative uncharacterized protein	tr|D2HE13|D2HE13_AILME Putative uncharacterized protein OS=Ailuropoda melanoleuca (Giant panda) GN=PANDA_008995 PE=4 SV=1;tr|G1M0I2|G1M0I2_AILME Uncharacterized protein OS=Ailuropoda melanoleuca (Giant panda) GN=LOC100475225 PE=4 SV=1	---	4;4	4;4	4;4	2	4	4	4	13.9	27.669	245	245;263	0	22.795				257	3990;4239;8014;8015	True;True;True;True	4253;4526;8690;8691	261321;261322;261323;261324;261325;261326;261327;261328;261329;261330;261331;261332;261333;261334;261335;261336;261337;261338;261339;261340;261341;261342;261343;261344;261345;261346;261347;261348;261349;261350;261351;261352;261353;261354;261355;281071;281072;281073;281074;281075;281076;281077;281078;281079;281080;281081;281082;281083;281084;281085;281086;281087;281088;281089;281090;281091;281092;…	477003;477004;477005;477006;477007;477008;477009;477010;477011;477012;477013;477014;477015;477016;477017;477018;477019;477020;477021;477022;477023;477024;477025;477026;477027;477028;477029;477030;477031;477032;477033;477034;477035;477036;477037;513276;513277;513278;513279;513280;513281;513282;513283;513284;513285;513286;513287;513288;513289;513290;513291;513292;513293;513294;513295;513296;513297;…	477009;513418;967168;967169			Q9NTK5	OLA1_HUMAN	Obg-like ATPase 1 OS=Homo sapiens (Human) GN=OLA1 PE=1 SV=2	1e-116	0.996	1	ok	120360	125630	114110	117580	92713	90384	118700	100070	145960	133310	99841
212	D2HE44	D2HE44;G1LW46	D2HE44;G1LW46	Uncharacterized protein	tr|D2HE44|D2HE44_AILME Uncharacterized protein OS=Ailuropoda melanoleuca (Giant panda) GN=SLC25A3 PE=3 SV=1;tr|G1LW46|G1LW46_AILME Uncharacterized protein OS=Ailuropoda melanoleuca (Giant panda) GN=SLC25A3 PE=3 SV=1	SLC25A3	13;12	13;12	13;12	2	13	13	13	37.6	39.99	362	362;361	0	174.78				258	2027;2527;2548;3363;3432;3482;4310;5648;5649;6241;6287;8538;9191	True;True;True;True;True;True;True;True;True;True;True;True;True	2161;2699;2721;3584;3658;3659;3710;4602;6072;6073;6074;6767;6768;6839;9247;9948;9949	132938;166154;166155;166156;166157;166158;166159;166160;166161;166162;166163;166164;166165;167284;167285;167286;167287;167288;167289;167290;167291;167292;167293;167294;167295;167296;167297;167298;167299;167300;167301;167302;167303;167304;167305;167306;167307;167308;167309;167310;167311;167312;167313;212550;212551;212552;212553;212554;212555;212556;212557;212558;212559;212560;212561;212562;212563;…	244893;307495;307496;307497;307498;307499;307500;307501;307502;307503;307504;307505;307506;307507;307508;307509;309731;309732;309733;309734;309735;309736;309737;309738;309739;309740;309741;309742;309743;309744;309745;309746;309747;309748;309749;309750;309751;309752;309753;309754;309755;309756;309757;309758;309759;309760;309761;309762;309763;309764;309765;309766;309767;309768;309769;309770;309771;…	244893;307502;309771;386516;399075;406024;524605;706649;706762;793248;799841;1040493;1161377	174;175	151;350	Q00325	MPCP_HUMAN	Phosphate carrier protein, mitochondrial OS=Homo sapiens (Human) GN=SLC25A3 PE=1 SV=2	7.9e-155	0.964	0.981	ok	2048400	1831600	1503200	1393600	1681000	1831600	1270400	1296800	1596300	1326700	2194000
213	D2HE77	D2HE77;G1M5L6	D2HE77;G1M5L6;G1LWF3	Putative uncharacterized protein	tr|D2HE77|D2HE77_AILME Putative uncharacterized protein OS=Ailuropoda melanoleuca (Giant panda) GN=PANDA_009078 PE=3 SV=1;tr|G1M5L6|G1M5L6_AILME ATP-dependent 6-phosphofructokinase OS=Ailuropoda melanoleuca (Giant panda) GN=PFKM PE=3 SV=1	---	36;36;4	36;36;4	28;28;2	3	36	36	28	60.8	85.852	785	785;853;768	0	323.31				259	355;533;534;561;609;1026;1418;1520;1759;2677;3035;3110;3294;3933;3994;4041;4762;4803;5424;5581;5582;5635;6157;6429;6713;7297;7555;7562;7570;7924;8168;8859;8919;9183;9532;9833	True;True;True;True;True;True;True;True;True;True;True;True;True;True;True;True;True;True;True;True;True;True;True;True;True;True;True;True;True;True;True;True;True;True;True;True	380;381;573;574;607;655;656;657;1096;1506;1622;1874;1875;2858;3235;3313;3512;4192;4193;4257;4305;5110;5111;5154;5825;6000;6001;6057;6058;6644;6645;6991;7304;7305;7919;8197;8207;8215;8597;8598;8852;8853;9597;9659;9940;10308;10639	26625;26626;26627;26628;26629;26630;26631;26632;26633;26634;26635;26636;26637;26638;26639;26640;26641;26642;26643;26644;26645;26646;26647;26648;26649;26650;26651;26652;26653;26654;26655;26656;26657;26658;26659;26660;26661;26662;26663;26664;26665;26666;26667;26668;26669;26670;26671;26672;26673;26674;26675;26676;26677;26678;26679;26680;26681;26682;26683;26684;26685;26686;26687;26688;26689;26690;266…	47265;47266;47267;47268;47269;47270;47271;47272;47273;47274;47275;47276;47277;47278;47279;47280;47281;47282;47283;47284;47285;47286;47287;47288;47289;47290;47291;47292;47293;47294;47295;47296;47297;47298;47299;47300;47301;47302;47303;47304;47305;47306;47307;47308;47309;47310;47311;47312;47313;47314;47315;47316;47317;47318;47319;47320;47321;47322;47323;47324;47325;47326;47327;47328;47329;47330;473…				P08237	PFKAM_HUMAN	ATP-dependent 6-phosphofructokinase, muscle type OS=Homo sapiens (Human) GN=PFKM PE=1 SV=2	0	0.972	0.995	ok	6331500	6258700	8940500	8391700	7860700	7990600	10171000	10021000	9065000	8773500	7407000
214	D2HE85	D2HE85;G1LYB9	D2HE85;G1LYB9	Putative uncharacterized protein	tr|D2HE85|D2HE85_AILME Putative uncharacterized protein OS=Ailuropoda melanoleuca (Giant panda) GN=PANDA_009086 PE=3 SV=1;tr|G1LYB9|G1LYB9_AILME Uncharacterized protein OS=Ailuropoda melanoleuca (Giant panda) GN=FBP2 PE=3 SV=1	---	13;13	13;13	12;12	2	13	13	12	48.5	36.686	338	338;339	0	218.56				260	301;302;3394;4502;4518;4700;4819;7821;8368;8458;9283;9854;10102	True;True;True;True;True;True;True;True;True;True;True;True;True	322;323;3616;4812;4830;5036;5170;8487;8488;9065;9163;10048;10660;10924;10925	21553;21554;21555;21556;21557;21558;21559;21560;21561;21562;21563;21564;21565;21566;21567;21568;21569;21570;21571;21572;21573;21574;21575;21576;21577;21578;21579;21580;21581;21582;21583;21584;21585;21586;21587;21588;21589;21590;21591;21592;21593;21594;21595;21596;21597;21598;21599;21600;21601;21602;21603;21604;21605;21606;21607;21608;21609;21610;21611;21612;21613;21614;21615;21616;21617;21618;216…	37205;37206;37207;37208;37209;37210;37211;37212;37213;37214;37215;37216;37217;37218;37219;37220;37221;37222;37223;37224;37225;37226;37227;37228;37229;37230;37231;37232;37233;37234;37235;37236;37237;37238;37239;37240;37241;37242;37243;37244;37245;37246;37247;37248;37249;37250;37251;37252;37253;37254;37255;37256;37257;37258;37259;37260;37261;37262;37263;37264;37265;37266;37267;37268;37269;37270;372…	37273;37340;391116;550574;552396;574070;587641;952438;1016597;1026420;1172665;1242997;1264161	185;186	11;249	O00757	F16P2_HUMAN	Fructose-1,6-bisphosphatase isozyme 2 OS=Homo sapiens (Human) GN=FBP2 PE=1 SV=2	0	0.953	0.991	ok	1122500	1213500	1162600	1199800	1086200	1130100	768630	1055900	1408200	1327600	952580
215	D2HEB7	D2HEB7;G1L5G2	D2HEB7;G1L5G2	Putative uncharacterized protein	tr|D2HEB7|D2HEB7_AILME Putative uncharacterized protein OS=Ailuropoda melanoleuca (Giant panda) GN=PANDA_009130 PE=4 SV=1;tr|G1L5G2|G1L5G2_AILME Uncharacterized protein OS=Ailuropoda melanoleuca (Giant panda) GN=GDI2 PE=4 SV=1	---	12;12	12;12	7;7	2	12	12	7	33	48.652	430	430;506	0	88.675				261	1388;2001;2492;2810;3316;4600;6079;7843;8148;8980;9305;9464	True;True;True;True;True;True;True;True;True;True;True;True	1475;2132;2661;2998;3536;4919;6529;8511;8832;9722;10073;10234	89862;89863;89864;89865;89866;89867;89868;89869;89870;89871;89872;89873;89874;89875;89876;89877;89878;89879;89880;89881;89882;89883;89884;89885;89886;89887;89888;89889;89890;89891;127305;127306;127307;127308;127309;160897;160898;160899;160900;160901;160902;160903;160904;160905;160906;160907;160908;160909;160910;160911;160912;160913;160914;182343;182344;182345;182346;182347;182348;182349;182350;18…	158525;158526;158527;158528;158529;158530;158531;158532;158533;158534;158535;158536;158537;158538;158539;158540;158541;158542;158543;158544;158545;158546;158547;158548;158549;158550;158551;158552;158553;158554;158555;231892;231893;231894;231895;231896;295155;295156;295157;295158;295159;295160;295161;295162;295163;295164;295165;295166;295167;295168;295169;295170;295171;295172;295173;295174;295175;…	158550;231894;295175;334740;383441;561342;768756;954562;994860;1123156;1175348;1193766			P50395	GDIB_HUMAN	Rab GDP dissociation inhibitor beta OS=Homo sapiens (Human) GN=GDI2 PE=1 SV=2	0	0.972	0.986	ok	197700	210640	258560	269090	206380	230070	190710	152240	199110	197740	152320
216	G1M0W3	G1M0W3;D2HEE0;G1M0X3	G1M0W3;D2HEE0;G1M0X3	Uncharacterized protein	tr|G1M0W3|G1M0W3_AILME Uncharacterized protein OS=Ailuropoda melanoleuca (Giant panda) GN=LMCD1 PE=4 SV=1;tr|D2HEE0|D2HEE0_AILME Putative uncharacterized protein OS=Ailuropoda melanoleuca (Giant panda) GN=PANDA_009158 PE=4 SV=1;tr|G1M0X3|G1M0X3_AILME Unc	LMCD1	19;19;18	19;19;18	19;19;18	3	19	19	19	55.6	41.014	363	363;396;334	0	77.707				262	1058;1500;2825;3169;3296;3383;3576;3744;5255;6172;6251;6355;6356;7134;7244;7251;8795;9194;10055	True;True;True;True;True;True;True;True;True;True;True;True;True;True;True;True;True;True;True	1131;1601;3014;3376;3514;3605;3807;3991;5644;6664;6784;6912;6913;7747;7862;7869;9530;9952;10873	68160;100603;100604;100605;100606;100607;100608;100609;100610;100611;100612;100613;100614;100615;100616;100617;100618;100619;100620;100621;100622;100623;100624;100625;100626;100627;100628;100629;183054;183055;183056;183057;183058;183059;183060;183061;183062;183063;183064;183065;183066;183067;183068;183069;183070;183071;183072;183073;183074;183075;183076;183077;183078;183079;183080;183081;183082;1…	117925;183850;183851;183852;183853;183854;183855;183856;183857;183858;183859;183860;183861;183862;183863;183864;183865;183866;183867;183868;183869;183870;183871;183872;183873;183874;183875;183876;183877;335945;335946;335947;335948;335949;335950;335951;335952;335953;335954;335955;335956;335957;335958;335959;335960;335961;335962;335963;335964;335965;335966;335967;335968;335969;335970;335971;335972;…	117925;183864;335994;365005;376459;390207;427065;444975;653807;783035;795461;809302;809316;886520;896789;897191;1103920;1161505;1260618			Q9NZU5	LMCD1_HUMAN	LIM and cysteine-rich domains protein 1 OS=Homo sapiens (Human) GN=LMCD1 PE=1 SV=1	3.2e-133	0.921	0.967	ok	26856		446540	505280	224580	186910	186510	279680	203090	201610
217	D2HEE4	D2HEE4;G1ME38	D2HEE4;G1ME38	Putative uncharacterized protein	tr|D2HEE4|D2HEE4_AILME Putative uncharacterized protein OS=Ailuropoda melanoleuca (Giant panda) GN=PANDA_009166 PE=4 SV=1;tr|G1ME38|G1ME38_AILME Uncharacterized protein OS=Ailuropoda melanoleuca (Giant panda) GN=VCL PE=4 SV=1	---	27;26	27;26	27;26	2	27	27	27	27.8	123.83	1134	1134;1137	0	107.63				263	380;428;429;677;829;969;1499;1677;2106;2147;2347;2348;3224;3446;4142;4271;6263;7208;7566;7723;8092;8249;8389;8391;8771;9160;9704	True;True;True;True;True;True;True;True;True;True;True;True;True;True;True;True;True;True;True;True;True;True;True;True;True;True;True	409;464;465;730;895;1038;1600;1787;2245;2289;2506;2507;3437;3673;4413;4561;6802;7825;8211;8377;8774;8938;9088;9090;9505;9915;10497	27782;27783;27784;27785;27786;27787;27788;27789;27790;27791;27792;27793;27794;27795;27796;27797;27798;27799;27800;27801;27802;27803;27804;27805;27806;27807;27808;27809;27810;27811;27812;27813;27814;27815;27816;27817;27818;27819;27820;27821;27822;27823;27824;27825;27826;27827;27828;27829;27830;27831;27832;27833;27834;27835;27836;27837;27838;27839;27840;27841;27842;27843;27844;27845;27846;27847;278…	49154;49155;49156;49157;49158;49159;49160;49161;49162;49163;49164;49165;49166;49167;49168;49169;49170;49171;49172;49173;49174;49175;49176;49177;49178;49179;49180;49181;49182;49183;49184;49185;49186;49187;49188;49189;49190;49191;49192;49193;49194;49195;49196;49197;49198;49199;49200;49201;49202;49203;49204;49205;49206;49207;49208;49209;49210;49211;49212;49213;49214;49215;49216;49217;49218;49219;492…	49234;54994;55062;79237;92001;108333;183849;204981;254559;257739;280099;280105;369975;401639;500766;516794;796674;892302;924716;942683;988913;1005230;1018822;1018909;1099389;1158953;1227143			P18206	VINC_HUMAN	Vinculin OS=Homo sapiens (Human) GN=VCL PE=1 SV=4	0	0.991	0.998	ok	104710	131950	301630	311120	244280	82648	261040	258330	322860	325650	26183
218	D2HEF2	D2HEF2;G1MEJ7	D2HEF2;G1MEJ7	Putative uncharacterized protein	tr|D2HEF2|D2HEF2_AILME Putative uncharacterized protein OS=Ailuropoda melanoleuca (Giant panda) GN=PANDA_009174 PE=4 SV=1;tr|G1MEJ7|G1MEJ7_AILME Uncharacterized protein OS=Ailuropoda melanoleuca (Giant panda) GN=SYNPO2L PE=4 SV=1	---	15;15	15;15	15;15	2	15	15	15	20.8	101.87	969	969;987	0	60.526				264	84;198;622;2761;2863;3001;3151;4365;6788;6793;6991;7452;8060;8238;10115	True;True;True;True;True;True;True;True;True;True;True;True;True;True;True	90;211;672;2946;3054;3200;3357;4664;7384;7390;7597;8089;8740;8926;10938	4006;4007;4008;4009;4010;4011;4012;4013;4014;4015;4016;4017;4018;4019;4020;4021;4022;4023;4024;4025;4026;4027;4028;4029;4030;4031;4032;4033;4034;4035;4036;4037;4038;4039;4040;4041;4042;4043;4044;4045;4046;4047;4048;4049;4050;4051;11542;11543;11544;11545;11546;11547;11548;11549;11550;11551;11552;11553;11554;11555;11556;11557;11558;11559;11560;11561;11562;11563;11564;11565;11566;11567;11568;11569;1…	6013;6014;6015;6016;6017;6018;6019;6020;6021;6022;6023;6024;6025;6026;6027;6028;6029;6030;6031;6032;6033;6034;6035;6036;6037;6038;6039;6040;6041;6042;6043;6044;6045;6046;6047;6048;6049;6050;6051;6052;6053;6054;6055;6056;6057;6058;6059;6060;6061;6062;6063;6064;6065;6066;6067;6068;6069;6070;6071;20448;20449;20450;20451;20452;20453;20454;20455;20456;20457;20458;20459;20460;20461;20462;20463;20464;20…	6014;20454;74486;327844;339986;351099;363847;529502;854830;855022;872187;918203;984452;1003510;1264823			Q9H987	SYP2L_HUMAN	Synaptopodin 2-like protein OS=Homo sapiens (Human) GN=SYNPO2L PE=2 SV=3	1e-91	0.914	0.949	OK		11737	160000	174580	176240	24653	225500	236040	271190	234040
219	G1MEU2	G1MEU2;D2HEF6;G1MEU5	G1MEU2;D2HEF6;G1MEU5	Annexin	tr|G1MEU2|G1MEU2_AILME Annexin OS=Ailuropoda melanoleuca (Giant panda) GN=ANXA7 PE=3 SV=1;tr|D2HEF6|D2HEF6_AILME Annexin OS=Ailuropoda melanoleuca (Giant panda) GN=PANDA_009180 PE=3 SV=1;tr|G1MEU5|G1MEU5_AILME Annexin OS=Ailuropoda melanoleuca (Giant pa	ANXA7	7;7;7	7;7;7	7;7;7	3	7	7	7	17.5	49.593	462	462;471;487	0	12.273				265	1407;2967;5275;6070;7523;8266;9133	True;True;True;True;True;True;True	1494;3164;5666;6520;8164;8958;9885	90377;90378;90379;90380;90381;90382;190472;190473;190474;190475;190476;190477;360193;360194;419658;419659;419660;419661;419662;508851;508852;508853;508854;508855;508856;508857;508858;508859;508860;508861;508862;508863;508864;508865;508866;508867;508868;508869;508870;508871;508872;508873;508874;508875;508876;508877;508878;508879;508880;508881;508882;508883;508884;508885;508886;555706;555707;555708…	159467;159468;159469;159470;159471;159472;347977;347978;347979;347980;347981;347982;662658;662659;768260;768261;768262;768263;768264;922417;922418;922419;922420;922421;922422;922423;922424;922425;922426;922427;922428;922429;922430;922431;922432;922433;922434;922435;922436;922437;922438;922439;922440;922441;922442;922443;922444;922445;922446;922447;922448;922449;922450;922451;922452;922453;1006059…	159468;347980;662658;768263;922429;1006061;1153563			P20073	ANXA7_HUMAN	Annexin A7 OS=Homo sapiens (Human) GN=ANXA7 PE=1 SV=3	6e-41	0.883	0.93	ok			53995		45153		53715	56499	49065	49966
220	D2HEG6	D2HEG6;G1MF85	D2HEG6;G1MF85	Putative uncharacterized protein	tr|D2HEG6|D2HEG6_AILME Putative uncharacterized protein OS=Ailuropoda melanoleuca (Giant panda) GN=PANDA_009191 PE=4 SV=1;tr|G1MF85|G1MF85_AILME Uncharacterized protein OS=Ailuropoda melanoleuca (Giant panda) GN=MCU PE=4 SV=1	---	4;4	4;4	4;4	2	4	4	4	20.1	32.514	278	278;301	0	7.551				266	1406;5756;8366;8648	True;True;True;True	1493;6190;9063;9367	90376;397723;397724;561673;561674;561675;561676;561677;561678;561679;561680;583802;583803;583804;583805;583806;583807;583808;583809;583810;583811;583812	159466;727916;727917;1016498;1016499;1016500;1016501;1016502;1016503;1016504;1016505;1060698;1060699;1060700;1060701;1060702;1060703;1060704;1060705;1060706;1060707;1060708	159466;727916;1016498;1060708			Q8NE86	MCU_HUMAN	Calcium uniporter protein, mitochondrial OS=Homo sapiens (Human) GN=MCU PE=1 SV=1	3.9e-143	1	1	ok			23542	23335	28664	35029			25138
221	D2HEJ4	D2HEJ4;G1MAY8	D2HEJ4;G1MAY8	Putative uncharacterized protein	tr|D2HEJ4|D2HEJ4_AILME Putative uncharacterized protein OS=Ailuropoda melanoleuca (Giant panda) GN=PANDA_009221 PE=4 SV=1;tr|G1MAY8|G1MAY8_AILME Uncharacterized protein OS=Ailuropoda melanoleuca (Giant panda) GN=LOC100469424 PE=4 SV=1	---	13;13	13;13	13;13	2	13	13	13	46.1	40.852	360	360;378	0	175.67				267	1095;1096;2587;2641;4267;5168;5310;6789;7135;7913;9692;9727;10117	True;True;True;True;True;True;True;True;True;True;True;True;True	1169;1170;2762;2818;4555;5551;5552;5703;5704;7385;7748;8584;10484;10520;10940	69944;69945;69946;69947;69948;69949;69950;69951;69952;69953;69954;69955;69956;69957;69958;69959;69960;69961;69962;69963;69964;69965;69966;69967;69968;69969;69970;69971;69972;69973;69974;69975;69976;69977;69978;69979;69980;69981;69982;69983;69984;69985;69986;69987;69988;69989;69990;69991;69992;69993;69994;69995;69996;69997;69998;69999;70000;70001;70002;70003;70004;70005;70006;70007;70008;70009;700…	120310;120311;120312;120313;120314;120315;120316;120317;120318;120319;120320;120321;120322;120323;120324;120325;120326;120327;120328;120329;120330;120331;120332;120333;120334;120335;120336;120337;120338;120339;120340;120341;120342;120343;120344;120345;120346;120347;120348;120349;120350;120351;120352;120353;120354;120355;120356;120357;120358;120359;120360;120361;120362;120363;120364;120365;120366;…	120450;120490;313132;318709;516020;645487;666075;854848;886528;959974;1219234;1228224;1264857	187;188	290;310	Q16795	NDUA9_HUMAN	NADH dehydrogenase [ubiquinone] 1 alpha subcomplex subunit 9, mitochondrial OS=Homo sapiens (Human) GN=NDUFA9 PE=1 SV=2	6.7e-189	0.852	0.95	OK	964510	1343700	1039200	1030000	1581900	1456300	1186600	1065700	1126800	1105800	1395400
222	D2HEM3	D2HEM3;G1LID2	D2HEM3;G1LID2	Putative uncharacterized protein	tr|D2HEM3|D2HEM3_AILME Putative uncharacterized protein OS=Ailuropoda melanoleuca (Giant panda) GN=PANDA_009257 PE=3 SV=1;tr|G1LID2|G1LID2_AILME Uncharacterized protein OS=Ailuropoda melanoleuca (Giant panda) GN=SERPINA1 PE=3 SV=1	---	6;6	6;6	5;5	2	6	6	5	14	46.776	421	421;464	0	48.452				268	4437;6239;6250;7028;7827;8881	True;True;True;True;True;True	4741;6764;6765;6782;6783;7636;8495;9619	295372;295373;295374;295375;295376;295377;295378;295379;295380;295381;295382;295383;295384;295385;295386;295387;295388;295389;295390;295391;295392;295393;295394;295395;295396;295397;295398;295399;295400;295401;295402;295403;295404;295405;295406;295407;295408;295409;295410;295411;295412;295413;295414;295415;295416;295417;295418;295419;295420;295421;295422;295423;295424;295425;295426;295427;295428;…	537727;537728;537729;537730;537731;537732;537733;537734;537735;537736;537737;537738;537739;537740;537741;537742;537743;537744;537745;537746;537747;537748;537749;537750;537751;537752;537753;537754;537755;537756;537757;537758;537759;537760;537761;537762;537763;537764;537765;537766;537767;537768;537769;537770;537771;537772;537773;537774;537775;537776;537777;537778;537779;537780;537781;537782;537783;…	537776;793132;795395;875627;953990;1112689	189;190	287;318	P01009	A1AT_HUMAN	Alpha-1-antitrypsin OS=Homo sapiens (Human) GN=SERPINA1 PE=1 SV=3	1.7e-155	0.717	0.933	not checked	1835200	1890500	1657000	1673100	793870	819330	1241700	1234200	762540	919240	2698100
223	D2HEP4	D2HEP4;G1L8G3	D2HEP4;G1L8G3	Putative uncharacterized protein	tr|D2HEP4|D2HEP4_AILME Putative uncharacterized protein OS=Ailuropoda melanoleuca (Giant panda) GN=PANDA_009281 PE=3 SV=1;tr|G1L8G3|G1L8G3_AILME Uncharacterized protein OS=Ailuropoda melanoleuca (Giant panda) GN=EEF1B2 PE=3 SV=1	---	3;3	3;3	3;3	2	3	3	3	16.4	24.821	225	225;228	0	11.59				269	6013;7651;7815	True;True;True	6463;8300;8481	416362;416363;416364;416365;416366;416367;416368;416369;416370;515992;515993;515994;515995;515996;515997;515998;515999;516000;516001;516002;516003;516004;516005;516006;516007;525489;525490;525491;525492;525493;525494;525495;525496;525497;525498;525499;525500;525501	762356;762357;762358;762359;762360;762361;762362;762363;762364;935762;935763;935764;935765;935766;935767;935768;935769;935770;935771;935772;935773;935774;935775;935776;935777;952023;952024;952025;952026;952027;952028;952029;952030;952031;952032;952033;952034;952035;952036	762359;935763;952033			P24534	EF1B_HUMAN	Elongation factor 1-beta OS=Homo sapiens (Human) GN=EEF1B2 PE=1 SV=3	1.8e-83	0.982	0.996	ok			37648		37513	42577	39052		54013	52433
224	D2HEP5	D2HEP5;G1L8K6	D2HEP5;G1L8K6	Putative uncharacterized protein	tr|D2HEP5|D2HEP5_AILME Putative uncharacterized protein OS=Ailuropoda melanoleuca (Giant panda) GN=PANDA_009282 PE=3 SV=1;tr|G1L8K6|G1L8K6_AILME Uncharacterized protein OS=Ailuropoda melanoleuca (Giant panda) GN=NDUFS1 PE=3 SV=1	---	34;34	34;34	34;34	2	34	34	34	54.2	77.338	707	707;741	0	323.31				270	522;902;1233;2459;2466;2467;2500;3180;3226;3488;3797;3798;4773;4811;5092;5844;5872;6003;6111;6143;6144;6161;6256;6361;6460;6635;6880;7457;8009;8692;8775;8930;9119;9539	True;True;True;True;True;True;True;True;True;True;True;True;True;True;True;True;True;True;True;True;True;True;True;True;True;True;True;True;True;True;True;True;True;True	561;971;1313;1314;2626;2633;2634;2670;3387;3439;3440;3717;4044;4045;5122;5123;5162;5471;6281;6311;6453;6571;6572;6623;6624;6649;6650;6791;6792;6918;7024;7216;7479;8094;8685;9418;9509;9671;9869;10315	36522;36523;36524;36525;36526;36527;36528;36529;36530;36531;36532;36533;36534;36535;36536;36537;36538;36539;36540;36541;36542;36543;36544;36545;36546;36547;36548;36549;36550;36551;36552;36553;36554;36555;36556;36557;36558;36559;36560;36561;36562;36563;36564;36565;36566;36567;36568;36569;36570;36571;36572;36573;36574;36575;36576;36577;36578;36579;36580;36581;36582;36583;36584;36585;60712;60713;607…	63864;63865;63866;63867;63868;63869;63870;63871;63872;63873;63874;63875;63876;63877;63878;63879;63880;63881;63882;63883;63884;63885;63886;63887;63888;63889;63890;63891;63892;63893;63894;63895;63896;63897;63898;63899;63900;63901;63902;63903;63904;63905;63906;63907;63908;63909;63910;63911;63912;63913;63914;63915;63916;63917;63918;63919;63920;63921;63922;63923;63924;63925;63926;63927;63928;63929;639…	63920;104158;132976;291561;292228;292234;295944;366023;370058;406605;451891;451970;584974;587284;637806;736120;744852;762026;770895;781161;781163;782561;796290;810059;816353;844572;859030;918728;967044;1090940;1100533;1117325;1151534;1200011	191;192;193;194;195;196;197;198	57;74;77;184;257;453;482;676	P28331	NDUS1_HUMAN	NADH-ubiquinone oxidoreductase 75 kDa subunit, mitochondrial OS=Homo sapiens (Human) GN=NDUFS1 PE=1 SV=3	0	0.987	0.997	ok	2016000	2073800	2605400	2851300	2437800	2413500	2336900	2375100	2331600	2307100	2090200
225	D2HEQ7	D2HEQ7;G1MIW8	D2HEQ7;G1MIW8	Protein-L-isoaspartate O-methyltransferase	tr|D2HEQ7|D2HEQ7_AILME Protein-L-isoaspartate O-methyltransferase OS=Ailuropoda melanoleuca (Giant panda) GN=PANDA_009296 PE=3 SV=1;tr|G1MIW8|G1MIW8_AILME Protein-L-isoaspartate O-methyltransferase OS=Ailuropoda melanoleuca (Giant panda) GN=PCMT1 PE=3 SV	---	8;8	8;8	8;8	2	8	8	8	59.8	22.529	209	209;281	0	53.366				271	442;2153;4560;5340;5341;6159;6185;9340	True;True;True;True;True;True;True;True	478;2295;4876;5736;5737;6647;6683;10108	31744;31745;31746;31747;31748;31749;31750;31751;31752;31753;31754;31755;31756;31757;31758;31759;31760;31761;31762;31763;31764;31765;31766;31767;31768;31769;31770;31771;31772;31773;31774;31775;31776;31777;31778;31779;31780;31781;31782;31783;31784;31785;31786;31787;31788;31789;31790;31791;140722;140723;140724;140725;140726;140727;140728;140729;140730;140731;140732;306462;306463;306464;306465;306466…	55514;55515;55516;55517;55518;55519;55520;55521;55522;55523;55524;55525;55526;55527;55528;55529;55530;55531;55532;55533;55534;55535;55536;55537;55538;55539;55540;55541;55542;55543;55544;55545;55546;55547;55548;55549;55550;55551;55552;55553;55554;55555;55556;55557;55558;55559;55560;55561;55562;55563;259335;259336;259337;259338;259339;259340;259341;259342;259343;259344;259345;556791;556792;556793;5…	55554;259338;556791;669059;669076;782532;785545;1180715	199	175	P22061	PIMT_HUMAN	Protein-L-isoaspartate(D-aspartate) O-methyltransferase OS=Homo sapiens (Human) GN=PCMT1 PE=1 SV=4	3.3e-98	0.962	0.986	ok	203550	142170	198570	180860	213460	215840	198460	142380	204450	203280	245980
226	G1M291	G1M291;D2HEV8	G1M291;D2HEV8	Uncharacterized protein	tr|G1M291|G1M291_AILME Uncharacterized protein OS=Ailuropoda melanoleuca (Giant panda) GN=LAMB2 PE=4 SV=1;tr|D2HEV8|D2HEV8_AILME Putative uncharacterized protein OS=Ailuropoda melanoleuca (Giant panda) GN=PANDA_009358 PE=4 SV=1	LAMB2	4;4	4;4	4;4	2	4	4	4	4	195.26	1797	1797;1805	0	7.6332				272	217;5686;9117;9328	True;True;True;True	230;6113;9867;10096	12476;12477;12478;12479;389835;389836;389837;389838;389839;389840;389841;633157;647843;647844;647845;647846;647847;647848;647849	21599;21600;21601;21602;713829;713830;713831;713832;713833;713834;713835;1151386;1178260;1178261;1178262;1178263;1178264;1178265;1178266	21599;713831;1151386;1178260			P55268	LAMB2_HUMAN	Laminin subunit beta-2 OS=Homo sapiens (Human) GN=LAMB2 PE=1 SV=2	0	0.909	0.971	ok
227	D2HF00	D2HF00	D2HF00	Uncharacterized protein	tr|D2HF00|D2HF00_AILME Uncharacterized protein OS=Ailuropoda melanoleuca (Giant panda) GN=PDHX PE=3 SV=1	PDHX	13	13	13	1	13	13	13	32.1	54.007	501	501	0	81.547				274	583;1630;3167;3536;4160;4380;4473;5137;5271;5272;5727;9434;9548	True;True;True;True;True;True;True;True;True;True;True;True;True	629;1737;3374;3767;4435;4679;4780;5518;5662;5663;6158;6159;10204;10324	39725;39726;39727;39728;39729;39730;39731;39732;39733;39734;39735;39736;39737;39738;39739;39740;39741;39742;39743;39744;39745;39746;109002;201004;201005;201006;201007;201008;201009;201010;201011;201012;201013;201014;201015;201016;201017;201018;201019;201020;201021;201022;201023;201024;201025;201026;201027;201028;201029;201030;201031;201032;201033;201034;201035;201036;201037;201038;201039;201040;2…	68898;68899;68900;68901;68902;68903;68904;68905;68906;68907;68908;68909;68910;68911;68912;68913;68914;68915;68916;68917;68918;68919;68920;200118;364915;364916;364917;364918;364919;364920;364921;364922;364923;364924;364925;364926;364927;364928;364929;364930;364931;364932;364933;364934;364935;364936;364937;364938;364939;364940;364941;364942;364943;364944;364945;364946;364947;364948;364949;364950;36…	68907;200118;364922;424021;502840;530335;541653;641606;654719;654767;722035;1191142;1202595	200	471	O00330	ODPX_HUMAN	Pyruvate dehydrogenase protein X component, mitochondrial OS=Homo sapiens (Human) GN=PDHX PE=1 SV=3	1.4e-97	0.892	0.952	ok	135930	152500	356490	448130	256630	333060	493810	454650	335790	174180	65841
228	D2HF47	D2HF47;G1MBX3	D2HF47;G1MBX3	Putative uncharacterized protein	tr|D2HF47|D2HF47_AILME Putative uncharacterized protein OS=Ailuropoda melanoleuca (Giant panda) GN=PANDA_009471 PE=3 SV=1;tr|G1MBX3|G1MBX3_AILME Uncharacterized protein OS=Ailuropoda melanoleuca (Giant panda) GN=LOC100465916 PE=3 SV=1	---	3;3	3;3	2;2	2	3	3	2	5.2	86.611	769	769;824	0	16.144				276	6839;9437;9570	True;True;True	7438;10207;10354	468169;656201;656202;656203;656204;656205;656206;656207;656208;656209;656210;656211;656212;656213;656214;656215;656216;656217;656218;656219;656220;656221;656222;656223;656224;656225;656226;656227;656228;656229;656230;656231;656232;656233;656234;656235;656236;656237;656238;656239;656240;666837;666838;666839;666840;666841	856766;1191191;1191192;1191193;1191194;1191195;1191196;1191197;1191198;1191199;1191200;1191201;1191202;1191203;1191204;1191205;1191206;1191207;1191208;1191209;1191210;1191211;1191212;1191213;1191214;1191215;1191216;1191217;1191218;1191219;1191220;1191221;1191222;1191223;1191224;1191225;1191226;1191227;1191228;1191229;1191230;1209173;1209174;1209175;1209176;1209177	856766;1191193;1209176			P00747	PLMN_HUMAN	Plasminogen OS=Homo sapiens (Human) GN=PLG PE=1 SV=2	2.2e-149	0.791	0.909	ok	23709			23463			20819	36245	25539	33238	23080
229	G1LR84	G1LR84;D2HFF1	G1LR84;D2HFF1	Uncharacterized protein	tr|G1LR84|G1LR84_AILME Uncharacterized protein OS=Ailuropoda melanoleuca (Giant panda) GN=AGL PE=4 SV=1;tr|D2HFF1|D2HFF1_AILME Putative uncharacterized protein OS=Ailuropoda melanoleuca (Giant panda) GN=PANDA_009617 PE=4 SV=1	AGL	68;68	68;68	68;68	2	68	68	68	54.2	174.52	1533	1533;1546	0	323.31				279	450;906;1016;1041;1281;1591;1954;2025;2094;2233;2290;2414;2974;3170;3179;3241;3266;3460;3494;3588;3652;3658;3697;3707;3750;3887;3889;3948;4065;4081;4151;4253;4281;4670;4672;5030;5138;5172;5173;5235;5266;5469;5558;5899;6277;6307;6364;6395;6461;7103;7557;7590;7597;7616;7617;7715;8314;9226;9414;9617;9618;9708;9709;9718;9726;9778;9884;10091	True;True;True;True;True;True;True;True;True;True;True;True;True;True;True;True;True;True;True;True;True;True;True;True;True;True;True;True;True;True;True;True;True;True;True;True;True;True;True;True;True;True;True;True;True;True;True;True;True;True;True;True;True;True;True;True;True;True;True;True;True;True;True;True;True;True;True;True	486;975;1086;1114;1363;1697;2084;2159;2233;2385;2447;2448;2577;3171;3377;3386;3455;3482;3687;3688;3723;3819;3888;3894;3940;3951;3997;4143;4145;4209;4330;4348;4424;4425;4540;4572;4997;4999;5403;5519;5556;5557;5623;5656;5870;5975;5976;6343;6825;6862;6921;6956;7025;7713;8199;8235;8242;8264;8265;8368;9008;9990;10184;10406;10407;10501;10502;10511;10519;10574;10575;10693;10912	32382;32383;32384;32385;32386;32387;32388;60766;60767;60768;60769;60770;60771;60772;60773;60774;60775;60776;60777;60778;60779;60780;60781;60782;60783;60784;60785;60786;60787;60788;60789;60790;60791;60792;60793;60794;60795;60796;60797;60798;60799;60800;60801;60802;60803;60804;60805;60806;60807;60808;60809;60810;60811;60812;60813;60814;60815;60816;60817;60818;60819;60820;60821;60822;60823;60824;608…	56543;56544;56545;56546;56547;56548;56549;104211;104212;104213;104214;104215;104216;104217;104218;104219;104220;104221;104222;104223;104224;104225;104226;104227;104228;104229;104230;104231;104232;104233;104234;104235;104236;104237;104238;104239;104240;104241;104242;104243;104244;104245;104246;104247;104248;104249;104250;104251;104252;104253;104254;104255;104256;104257;104258;104259;104260;104261;…	56546;104280;111304;116830;137348;193554;229191;244800;253259;266641;276171;286454;348510;365087;365969;371847;372899;402319;406890;427641;435945;436389;441112;442241;445344;465311;465405;469509;490732;492177;501336;515034;517506;570173;570195;631799;641698;645850;645857;652274;654608;685653;700068;749013;797935;802058;810509;813002;816391;884647;923848;931190;931650;932962;933035;942245;1011590;…	202;203;204;205;206	157;281;941;992;1261	P35573	GDE_HUMAN	Glycogen debranching enzyme OS=Homo sapiens (Human) GN=AGL PE=1 SV=3	0	0.939	0.983	ok	1828600	1799100	3415100	3517400	3009400	2029400	3208800	3233600	3468900	3662200	1665300
230	D2HFJ1	D2HFJ1;G1LG83;D2HJS3	D2HFJ1;G1LG83;D2HJS3	Putative uncharacterized protein	tr|D2HFJ1|D2HFJ1_AILME Putative uncharacterized protein OS=Ailuropoda melanoleuca (Giant panda) GN=PANDA_009667 PE=3 SV=1;tr|G1LG83|G1LG83_AILME Uncharacterized protein OS=Ailuropoda melanoleuca (Giant panda) GN=SLC25A6 PE=3 SV=1;tr|D2HJS3|D2HJS3_AILME U	---	10;10;8	2;2;1	2;2;1	3	10	2	2	42.4	29.315	264	264;288;265	0	33.217				280	102;2238;2871;3214;3216;3233;4877;6206;9851;9865	False;True;False;True;False;False;False;False;False;False	108;2390;3062;3423;3426;3427;3447;5233;6717;6718;6719;10657;10672	5015;5016;5017;5018;5019;5020;5021;5022;5023;5024;5025;5026;5027;5028;5029;5030;5031;5032;5033;5034;5035;5036;5037;5038;5039;5040;5041;5042;5043;5044;5045;5046;5047;5048;5049;5050;5051;5052;5053;146385;146386;146387;146388;146389;146390;185453;185454;185455;185456;185457;185458;185459;185460;185461;185462;185463;185464;185465;185466;185467;185468;185469;185470;185471;185472;185473;185474;185475;1…	8021;8022;8023;8024;8025;8026;8027;8028;8029;8030;8031;8032;8033;8034;8035;8036;8037;8038;8039;8040;8041;8042;8043;8044;8045;8046;8047;8048;8049;8050;8051;8052;8053;8054;8055;8056;8057;8058;8059;8060;8061;8062;8063;8064;8065;8066;8067;8068;8069;8070;8071;8072;8073;8074;8075;8076;8077;8078;8079;8080;8081;8082;8083;8084;8085;8086;8087;8088;8089;8090;8091;8092;8093;8094;8095;8096;8097;8098;8099;8100…	8041;268203;340495;369285;369345;370590;593875;788004;1242796;1243637			P12236	ADT3_HUMAN	ADP/ATP translocase 3 OS=Homo sapiens (Human) GN=SLC25A6 PE=1 SV=4	3.3e-129	0.977	0.996	ok	468960	547670	640390	703070	833550	1000400	52788	535200	406080	326530	577340
231	D2HFS8	D2HFS8	D2HFS8;G1L1B3	Putative uncharacterized protein	tr|D2HFS8|D2HFS8_AILME Putative uncharacterized protein OS=Ailuropoda melanoleuca (Giant panda) GN=PANDA_009772 PE=3 SV=1	---	9;4	9;4	9;4	2	9	9	9	93.3	16.003	150	150;183	0	323.31				281	634;708;2544;3557;3572;5651;7262;9568;10025	True;True;True;True;True;True;True;True;True	684;762;2717;3788;3803;6076;7880;10352;10840	43422;43423;43424;43425;43426;43427;43428;43429;43430;43431;43432;43433;43434;43435;43436;43437;43438;43439;43440;43441;43442;43443;43444;43445;43446;43447;43448;43449;43450;43451;43452;43453;43454;43455;43456;43457;43458;43459;43460;43461;43462;43463;43464;43465;43466;43467;43468;43469;43470;43471;43472;43473;43474;43475;43476;43477;43478;43479;43480;43481;43482;43483;43484;43485;43486;43487;434…	75568;75569;75570;75571;75572;75573;75574;75575;75576;75577;75578;75579;75580;75581;75582;75583;75584;75585;75586;75587;75588;75589;75590;75591;75592;75593;75594;75595;75596;75597;75598;75599;75600;75601;75602;75603;75604;75605;75606;75607;75608;75609;75610;75611;75612;75613;75614;75615;75616;75617;75618;75619;75620;75621;75622;75623;75624;75625;75626;75627;75628;75629;75630;75631;75632;75633;756…	75657;82135;309660;425998;426739;706852;898721;1209154;1257160			O14558	HSPB6_HUMAN	Heat shock protein beta-6 OS=Homo sapiens (Human) GN=HSPB6 PE=1 SV=2	6.7e-48	0.913	0.96	not checked	1402700	1215500	1428600	1130500	2727000	2553900	2537700	2218000	1024900	884030	1246900
232	D2HFU7	D2HFU7;G1L2I3	D2HFU7;G1L2I3	Putative uncharacterized protein	tr|D2HFU7|D2HFU7_AILME Putative uncharacterized protein OS=Ailuropoda melanoleuca (Giant panda) GN=PANDA_009795 PE=4 SV=1;tr|G1L2I3|G1L2I3_AILME Uncharacterized protein OS=Ailuropoda melanoleuca (Giant panda) GN=COX7A1 PE=4 SV=1	---	2;2	2;2	2;2	2	2	2	2	34.3	7.4084	67	67;80	0	18.064				282	3009;5190	True;True	3208;5574	191990;191991;191992;191993;353388;353389;353390;353391;353392;353393;353394;353395;353396;353397;353398;353399;353400;353401;353402;353403;353404;353405;353406;353407;353408;353409;353410;353411;353412;353413;353414	351175;351176;351177;351178;646966;646967;646968;646969;646970;646971;646972;646973;646974;646975;646976;646977;646978;646979;646980;646981;646982;646983;646984;646985;646986;646987;646988;646989;646990;646991;646992;646993;646994;646995	351176;646990			P24310	CX7A1_HUMAN	Cytochrome c oxidase subunit 7A1, mitochondrial OS=Homo sapiens (Human) GN=COX7A1 PE=1 SV=2	6.1e-26	0.806	0.925	ok	137430	138670	54307	66878			73100	59542			81043
233	D2HFZ1	D2HFZ1;G1M3I9;D2HVX2	D2HFZ1;G1M3I9;D2HVX2	Putative uncharacterized protein	tr|D2HFZ1|D2HFZ1_AILME Putative uncharacterized protein OS=Ailuropoda melanoleuca (Giant panda) GN=PANDA_009900 PE=4 SV=1;tr|G1M3I9|G1M3I9_AILME Uncharacterized protein OS=Ailuropoda melanoleuca (Giant panda) GN=PRKACA PE=4 SV=1;tr|D2HVX2|D2HVX2_AILME Un	---	10;10;7	10;10;7	10;10;7	3	10	10	10	32.5	38.65	332	332;343;397	0	27.632				283	1396;2701;2702;4169;4834;4860;6521;6522;7013;9691	True;True;True;True;True;True;True;True;True;True	1483;2882;2883;4444;5186;5213;7086;7087;7621;10483	90078;90079;175565;175566;175567;175568;175569;175570;175571;175572;175573;175574;175575;175576;175577;175578;175579;175580;175581;175582;175583;175584;175585;175586;175587;175588;175589;276284;276285;276286;276287;276288;276289;276290;276291;276292;276293;276294;276295;276296;276297;276298;276299;276300;276301;276302;276303;276304;276305;276306;276307;276308;276309;276310;276311;276312;276313;27…	158808;158809;323577;323578;323579;323580;323581;323582;323583;323584;323585;323586;323587;323588;323589;323590;323591;323592;323593;323594;323595;323596;323597;323598;323599;323600;323601;323602;323603;323604;323605;504459;504460;504461;504462;504463;504464;504465;504466;504467;504468;504469;504470;504471;504472;504473;504474;504475;504476;504477;504478;504479;504480;504481;504482;504483;504484;…	158808;323599;323605;504530;589116;593069;826108;826145;874578;1219211			P17612	KAPCA_HUMAN	cAMP-dependent protein kinase catalytic subunit alpha OS=Homo sapiens (Human) GN=PRKACA PE=1 SV=2	3.9e-84	0.991	1	not checked	148700	172740	132660	191310	113470	96744	201360	120010	132480	137390	111740
234	D2HG09	D2HG09;G1M0V1	D2HG09;G1M0V1	Putative uncharacterized protein	tr|D2HG09|D2HG09_AILME Putative uncharacterized protein OS=Ailuropoda melanoleuca (Giant panda) GN=PANDA_009860 PE=4 SV=1;tr|G1M0V1|G1M0V1_AILME Uncharacterized protein OS=Ailuropoda melanoleuca (Giant panda) GN=PRDX2 PE=4 SV=1	---	14;14	14;14	13;13	2	14	14	13	84.3	21.928	198	198;199	0	278.32				284	345;1190;1907;3153;4561;4584;4719;5206;6015;6534;6535;7034;7971;9982	True;True;True;True;True;True;True;True;True;True;True;True;True;True	369;1267;2033;3359;4877;4903;5058;5593;6465;7100;7101;7642;8645;10793	25603;25604;25605;25606;25607;25608;25609;25610;25611;25612;25613;25614;25615;25616;25617;25618;25619;25620;25621;25622;25623;25624;25625;25626;25627;25628;25629;25630;25631;25632;25633;25634;25635;25636;25637;25638;25639;25640;25641;25642;25643;25644;25645;25646;25647;25648;25649;25650;25651;25652;25653;25654;25655;25656;25657;25658;25659;25660;25661;25662;25663;25664;25665;25666;25667;25668;256…	45467;45468;45469;45470;45471;45472;45473;45474;45475;45476;45477;45478;45479;45480;45481;45482;45483;45484;45485;45486;45487;45488;45489;45490;45491;45492;45493;45494;45495;45496;45497;45498;45499;45500;45501;45502;45503;45504;45505;45506;45507;45508;45509;45510;45511;45512;45513;45514;45515;45516;45517;45518;45519;45520;45521;45522;45523;45524;45525;45526;45527;45528;45529;45530;45531;45532;455…	45839;128920;224958;363997;556818;560699;577075;648538;762530;831676;831821;876124;964399;1252316			P32119	PRDX2_HUMAN	Peroxiredoxin-2 OS=Homo sapiens (Human) GN=PRDX2 PE=1 SV=5	5.2e-95	0.944	0.98	ok	5029600	5314600	3480500	3527800	4086500	4043200	3357000	3184100	2447000	2413000	5208200
235	D2HG18	D2HG18;G1M1K2	D2HG18;G1M1K2	Putative uncharacterized protein	tr|D2HG18|D2HG18_AILME Putative uncharacterized protein OS=Ailuropoda melanoleuca (Giant panda) GN=PANDA_009870 PE=4 SV=1;tr|G1M1K2|G1M1K2_AILME Uncharacterized protein OS=Ailuropoda melanoleuca (Giant panda) GN=RAD23A PE=4 SV=1	---	2;2	1;1	1;1	2	2	1	1	11.5	36.845	339	339;380	0	9.7123				285	1097;7228	False;True	1171;7845	70047;70048;70049;70050;491505;491506;491507;491508;491509;491510;491511;491512;491513;491514;491515;491516;491517;491518;491519;491520;491521;491522;491523;491524;491525;491526;491527	120500;120501;120502;120503;896000;896001;896002;896003;896004;896005;896006;896007;896008;896009;896010;896011;896012;896013;896014;896015;896016;896017;896018;896019;896020;896021;896022	120502;896002			P54725	RD23A_HUMAN	UV excision repair protein RAD23 homolog A OS=Homo sapiens (Human) GN=RAD23A PE=1 SV=1	1.5e-72	0.973	0.997	ok					18449	12220			12966	11178
236	D2HG63	D2HG63;G1MDT3	D2HG63;G1MDT3	Putative uncharacterized protein	tr|D2HG63|D2HG63_AILME Putative uncharacterized protein OS=Ailuropoda melanoleuca (Giant panda) GN=PANDA_009952 PE=3 SV=1;tr|G1MDT3|G1MDT3_AILME Uncharacterized protein OS=Ailuropoda melanoleuca (Giant panda) GN=DHRS4 PE=3 SV=1	---	3;3	3;3	3;3	2	3	3	3	11.9	28.609	268	268;284	0.0014684	5.8233				286	4124;8057;8655	True;True;True	4395;8737;9376	273608;273609;273610;273611;273612;273613;273614;273615;273616;273617;273618;273619;273620;273621;273622;273623;542680;542681;542682;542683;542684;542685;542686;542687;542688;542689;542690;542691;542692;542693;542694;542695;542696;542697;542698;542699;542700;542701;542702;542703;542704;542705;542706;542707;542708;542709;542710;542711;542712;542713;542714;542715;542716;542717;542718;542719;542720;…	498788;498789;498790;498791;498792;498793;498794;498795;498796;498797;498798;498799;498800;498801;498802;498803;984070;984071;984072;984073;984074;984075;984076;984077;984078;984079;984080;984081;984082;984083;984084;984085;984086;984087;984088;984089;984090;984091;984092;984093;984094;984095;984096;984097;984098;984099;984100;984101;984102;984103;984104;984105;984106;984107;984108;984109;984110;…	498799;984077;1061922			Q9BTZ2	DHRS4_HUMAN	Dehydrogenase/reductase SDR family member 4 OS=Homo sapiens (Human) GN=DHRS4 PE=1 SV=3	1.6e-112	0.881	0.966	ok		105890	92996	110640	133080	135780	81062	92443	215880	166670	121690
237	D2HG69	D2HG69;G1MEG9	D2HG69;G1MEG9;Q1M0N4;G8Z296;G8Z295;REV__D2H6M9;REV__G1LC14	Putative uncharacterized protein	tr|D2HG69|D2HG69_AILME Putative uncharacterized protein OS=Ailuropoda melanoleuca (Giant panda) GN=PANDA_009961 PE=4 SV=1;tr|G1MEG9|G1MEG9_AILME Uncharacterized protein OS=Ailuropoda melanoleuca (Giant panda) GN=MYH7 PE=4 SV=1	---	153;153;22;22;22;1;1	118;118;15;15;15;1;1	42;42;6;6;6;1;1	7	153	118	42	60.7	214.01	1865	1865;1893;165;165;167;581;623	0	323.31				287	129;130;219;306;510;511;591;663;1028;1209;1304;1371;1372;1496;1556;1628;1629;1672;1744;1812;1813;1856;1857;2036;2060;2068;2069;2150;2151;2152;2164;2192;2234;2257;2263;2264;2491;3129;3130;3191;3299;3367;3404;3533;3541;3544;3873;3876;3886;4009;4090;4091;4163;4190;4211;4528;4529;4562;4595;4607;4631;4643;4680;4686;4691;4695;4702;4704;4752;4855;4856;4893;4894;4942;5064;5065;5071;5074;5077;5084;5119;51…	False;False;True;False;True;True;False;True;False;True;False;False;False;False;True;True;True;True;True;True;True;True;True;True;True;True;True;False;False;True;True;False;False;True;True;True;True;True;True;True;True;True;True;True;False;True;True;True;True;True;True;True;True;True;True;True;True;True;False;True;True;True;True;True;True;True;False;True;True;True;True;True;True;False;True;True;Fa…	138;139;232;327;328;548;549;637;716;1098;1286;1386;1458;1459;1597;1658;1735;1736;1782;1858;1929;1930;1931;1932;1978;1979;1980;2171;2198;2206;2207;2292;2293;2294;2306;2307;2308;2340;2386;2412;2418;2419;2658;2659;2660;3335;3336;3399;3518;3588;3627;3764;3772;3775;4124;4127;4128;4129;4142;4273;4357;4358;4438;4465;4496;4843;4844;4878;4914;4927;4952;4965;5007;5014;5024;5025;5030;5031;5038;5040;5093;509…	7742;7743;7744;7745;7746;7747;7748;7749;7750;7751;7752;7753;7754;7755;7756;7757;7758;7759;7760;7761;7762;7763;7764;7765;7766;7767;7768;7769;7770;7771;7772;7773;7774;7775;7776;7777;7778;7779;7780;7781;7782;7783;7784;7785;7786;7787;7788;7789;7790;7791;7792;7793;7794;7795;7796;7797;7798;7799;7800;7801;7802;7803;7804;7805;7806;7807;7808;7809;7810;7811;7812;7813;7814;7815;7816;7817;7818;7819;7820;7821…					P12883	MYH7_HUMAN	Myosin-7 OS=Homo sapiens (Human) GN=MYH7 PE=1 SV=5	0	0.915	0.941	ok	79481000	80430000	74364000	75683000	74567000	79218000	40702000	40356000	36681000	36655000	76168000
238	D2HG70	D2HG70	D2HG70	Putative uncharacterized protein	tr|D2HG70|D2HG70_AILME Putative uncharacterized protein OS=Ailuropoda melanoleuca (Giant panda) GN=PANDA_009963 PE=4 SV=1	---	121	9	9	1	121	9	9	45	218.55	1913	1913	0	203.93				288	129;130;306;388;389;510;511;591;663;1028;1304;1371;1372;1496;1744;1812;1813;2036;2060;2068;2069;2164;2192;2234;2263;2264;2491;3129;3130;3191;3367;3404;3533;3541;3544;3869;3876;3886;4009;4163;4190;4211;4524;4525;4528;4529;4566;4595;4607;4631;4643;4686;4689;4691;4695;4702;4703;4750;4752;4855;4856;4893;4894;4942;5071;5072;5073;5077;5084;5119;5126;5139;5140;5406;5407;5471;5747;5884;5916;5943;5944;605…	False;False;False;False;False;False;False;False;False;False;False;False;False;False;False;False;False;False;False;False;False;False;False;False;False;False;False;False;False;False;False;False;False;False;False;True;False;False;False;False;False;False;False;False;False;False;False;False;False;False;False;False;True;False;False;False;False;True;False;False;False;False;False;False;False;False;False;…	138;139;327;328;418;419;420;421;422;423;548;549;637;716;1098;1386;1458;1459;1597;1858;1929;1930;1931;1932;2171;2198;2206;2207;2306;2307;2308;2340;2386;2418;2419;2658;2659;2660;3335;3336;3399;3588;3627;3764;3772;3775;4119;4127;4128;4129;4142;4273;4438;4465;4496;4836;4837;4838;4839;4840;4843;4844;4882;4914;4927;4952;4965;5014;5020;5024;5025;5030;5031;5038;5039;5089;5093;5094;5095;5208;5209;5250;525…	7742;7743;7744;7745;7746;7747;7748;7749;7750;7751;7752;7753;7754;7755;7756;7757;7758;7759;7760;7761;7762;7763;7764;7765;7766;7767;7768;7769;7770;7771;7772;7773;7774;7775;7776;7777;7778;7779;7780;7781;7782;7783;7784;7785;7786;7787;7788;7789;7790;7791;7792;7793;7794;7795;7796;7797;7798;7799;7800;7801;7802;7803;7804;7805;7806;7807;7808;7809;7810;7811;7812;7813;7814;7815;7816;7817;7818;7819;7820;7821…					P13533	MYH6_HUMAN	Myosin-6 OS=Homo sapiens (Human) GN=MYH6 PE=1 SV=5	1e-201	0.874	0.918	ok	2112500	2263500	1380800	1278200	2020200	1972400	837160	717620	647280	786100	1597000
239	D2HG83	D2HG83	D2HG83	Acetyltransferase component of pyruvate dehydrogenase complex	tr|D2HG83|D2HG83_AILME Acetyltransferase component of pyruvate dehydrogenase complex OS=Ailuropoda melanoleuca (Giant panda) GN=DLAT PE=3 SV=1	DLAT	17	17	17	1	17	17	17	33.7	69.13	647	647	0	135.59				289	703;1308;1643;1644;2115;3148;4152;4183;4364;5196;5726;6006;6410;9260;9284;9549;9958	True;True;True;True;True;True;True;True;True;True;True;True;True;True;True;True;True	757;1390;1753;1754;2254;3354;4426;4458;4663;5581;6156;6157;6456;6971;10024;10049;10050;10325;10767;10768	47401;47402;47403;47404;47405;47406;47407;47408;47409;47410;47411;47412;47413;47414;47415;47416;47417;47418;47419;47420;47421;47422;47423;47424;47425;47426;47427;47428;47429;81906;81907;81908;81909;81910;81911;81912;81913;81914;81915;81916;81917;81918;81919;81920;81921;81922;81923;81924;81925;81926;81927;81928;81929;81930;81931;81932;81933;81934;81935;81936;81937;81938;81939;81940;81941;81942;819…	81989;81990;81991;81992;81993;81994;81995;81996;81997;81998;81999;82000;82001;82002;82003;82004;82005;82006;82007;82008;82009;82010;82011;82012;82013;82014;82015;82016;82017;141291;141292;141293;141294;141295;141296;141297;141298;141299;141300;141301;141302;141303;141304;141305;141306;141307;141308;141309;141310;141311;141312;141313;141314;141315;141316;141317;141318;141319;141320;141321;141322;1…	82010;141412;201715;201753;254910;363367;501395;505764;529440;647350;721932;762037;813585;1171512;1172746;1202647;1251354	238;239	103;570	P10515	ODP2_HUMAN	Dihydrolipoyllysine-residue acetyltransferase component of pyruvate dehydrogenase complex, mitochondrial OS=Homo sapiens (Human) GN=DLAT PE=1 SV=3	8e-111	0.904	0.957	ok	1064100	990370	1591500	1718500	1437400	1428200	1429500	1527900	1305600	1373000	1175000
240	D2HG86	D2HG86	D2HG86	Uncharacterized protein	tr|D2HG86|D2HG86_AILME Uncharacterized protein OS=Ailuropoda melanoleuca (Giant panda) GN=HSPB2 PE=3 SV=1	HSPB2	7	7	7	1	7	7	7	54.4	20.339	182	182	0	63.791				290	53;2545;2546;2706;7991;8537;8600	True;True;True;True;True;True;True	57;2718;2719;2887;8667;9246;9316	2407;2408;2409;2410;2411;2412;2413;2414;2415;2416;2417;2418;2419;2420;2421;2422;2423;2424;2425;2426;2427;2428;2429;2430;2431;2432;2433;2434;167227;167228;167229;167230;167231;167232;167233;167234;167235;167236;167237;167238;167239;167240;167241;167242;167243;167244;167245;167246;167247;167248;167249;167250;167251;167252;167253;167254;167255;167256;167257;167258;167259;167260;167261;167262;167263;…	3462;3463;3464;3465;3466;3467;3468;3469;3470;3471;3472;3473;3474;3475;3476;3477;3478;3479;3480;3481;3482;3483;3484;3485;3486;3487;3488;3489;3490;3491;3492;3493;3494;3495;3496;3497;3498;3499;3500;309666;309667;309668;309669;309670;309671;309672;309673;309674;309675;309676;309677;309678;309679;309680;309681;309682;309683;309684;309685;309686;309687;309688;309689;309690;309691;309692;309693;309694;3…	3474;309668;309671;324031;966236;1040403;1052110			Q16082	HSPB2_HUMAN	Heat shock protein beta-2 OS=Homo sapiens (Human) GN=HSPB2 PE=1 SV=2	4e-82	0.973	0.984	ok	181810	173080	136930	154480	309130	278500	156990	168120	271790	268970	142970
241	D2HG87	D2HG87	D2HG87	Alpha B-crystallin protein	tr|D2HG87|D2HG87_AILME Alpha B-crystallin protein OS=Ailuropoda melanoleuca (Giant panda) GN=CRYAB PE=2 SV=1	CRYAB	13	13	13	1	13	13	13	85.7	20.067	175	175	0	278.37				291	635;1529;1848;2765;3558;3573;4237;5162;6116;6918;7356;9123;10023	True;True;True;True;True;True;True;True;True;True;True;True;True	685;686;1631;1968;2950;3789;3804;4524;5545;6580;6581;7517;7982;9874;10838	43562;43563;43564;43565;43566;43567;43568;43569;43570;43571;43572;43573;43574;43575;43576;43577;43578;43579;43580;43581;43582;43583;43584;43585;43586;43587;43588;43589;43590;43591;43592;43593;43594;43595;43596;43597;43598;43599;43600;43601;43602;43603;43604;43605;43606;43607;43608;43609;43610;43611;43612;43613;43614;43615;43616;43617;43618;43619;43620;43621;43622;43623;43624;43625;43626;43627;436…	75783;75784;75785;75786;75787;75788;75789;75790;75791;75792;75793;75794;75795;75796;75797;75798;75799;75800;75801;75802;75803;75804;75805;75806;75807;75808;75809;75810;75811;75812;75813;75814;75815;75816;75817;75818;75819;75820;75821;75822;75823;75824;75825;75826;75827;75828;75829;75830;75831;75832;75833;75834;75835;75836;75837;75838;75839;75840;75841;75842;75843;75844;75845;75846;75847;75848;758…	75908;187601;217253;328022;426037;426822;513151;644937;771502;863799;909558;1151892;1257134	240;241	1;68	P02511	CRYAB_HUMAN	Alpha-crystallin B chain OS=Homo sapiens (Human) GN=CRYAB PE=1 SV=2	1.1e-75	0.983	1	ok	985860	1535700	4186200	4031300	1145900	801920	2162100	3162800		41963	1400000
242	D2HGA6	D2HGA6;G1LNI2	D2HGA6;G1LNI2	Putative uncharacterized protein	tr|D2HGA6|D2HGA6_AILME Putative uncharacterized protein OS=Ailuropoda melanoleuca (Giant panda) GN=PANDA_010008 PE=3 SV=1;tr|G1LNI2|G1LNI2_AILME Uncharacterized protein OS=Ailuropoda melanoleuca (Giant panda) GN=CCT8 PE=3 SV=1	---	7;7	7;7	7;7	2	7	7	7	15.3	57.556	528	528;548	0	22.606				292	351;2439;4961;5198;6007;6047;8543	True;True;True;True;True;True;True	376;2605;5330;5583;6457;6497;9252	26212;157369;157370;157371;157372;157373;157374;157375;336580;353886;353887;353888;353889;353890;353891;353892;353893;353894;353895;353896;353897;353898;353899;353900;353901;353902;353903;353904;353905;353906;353907;353908;353909;353910;353911;353912;353913;353914;353915;353916;353917;353918;353919;353920;353921;353922;353923;353924;353925;353926;353927;353928;353929;416128;416129;416130;416131;4…	46481;288417;288418;288419;288420;288421;288422;288423;606760;647643;647644;647645;647646;647647;647648;647649;647650;647651;647652;647653;647654;647655;647656;647657;647658;647659;647660;647661;647662;647663;647664;647665;647666;647667;647668;647669;647670;647671;647672;647673;647674;647675;647676;647677;647678;647679;647680;647681;647682;647683;647684;647685;647686;762040;762041;762042;762043;7…	46481;288420;606760;647678;762040;766758;1040735			P50990	TCPQ_HUMAN	T-complex protein 1 subunit theta OS=Homo sapiens (Human) GN=CCT8 PE=1 SV=4	0	0.981	0.996	ok			45082	46060	32511			47230	38661	39703
243	D2HGC1	D2HGC1;G1LQL2	D2HGC1;G1LQL2	Putative uncharacterized protein	tr|D2HGC1|D2HGC1_AILME Putative uncharacterized protein OS=Ailuropoda melanoleuca (Giant panda) GN=PANDA_010027 PE=3 SV=1;tr|G1LQL2|G1LQL2_AILME Uncharacterized protein OS=Ailuropoda melanoleuca (Giant panda) GN=CANX PE=3 SV=1	---	5;5	5;5	5;5	2	5	5	5	10.5	57.517	507	507;594	0	11.193				293	641;3407;4265;4671;8404	True;True;True;True;True	692;3630;4553;4998;9103	43828;217451;217452;217453;217454;217455;217456;217457;217458;217459;217460;217461;217462;217463;217464;217465;217466;217467;217468;217469;217470;217471;217472;217473;217474;217475;217476;217477;217478;217479;217480;217481;217482;217483;217484;282477;314228;564125;564126;564127;564128;564129;564130	76135;397599;397600;397601;397602;397603;397604;397605;397606;397607;397608;397609;397610;397611;397612;397613;397614;397615;397616;397617;397618;397619;397620;397621;397622;397623;397624;397625;397626;397627;397628;397629;397630;397631;397632;515801;570193;1020120;1020121;1020122;1020123;1020124;1020125	76135;397607;515801;570193;1020124			P27824	CALX_HUMAN	Calnexin OS=Homo sapiens (Human) GN=CANX PE=1 SV=2	2.2e-212	0.955	0.994	not checked			24231		31053	39240
244	D2HGC3	D2HGC3;I0IVC1;D2H6F1;D2I2N0	D2HGC3;I0IVC1;D2H6F1;D2I2N0	Uncharacterized protein	tr|D2HGC3|D2HGC3_AILME Uncharacterized protein OS=Ailuropoda melanoleuca (Giant panda) GN=HNRNPH1 PE=4 SV=1;tr|I0IVC1|I0IVC1_URSTH Heterogenous nuclear ribonucleoprotein F OS=Ursus thibetanus japonicus (Japanese black bear) GN=HNRPF PE=2 SV=1;tr|D2H6F1|D	HNRNPH1	2;1;1;1	2;1;1;1	2;1;1;1	4	2	2	2	7	51.084	472	472;150;414;449	0.0014728	5.8942				294	769;3714	True;True	828;3958	50755;50756;242094;242095;242096;242097;242098;242099;242100;242101	87219;87220;442544;442545;442546;442547;442548;442549;442550;442551	87219;442547			P31943	HNRH1_HUMAN	Heterogeneous nuclear ribonucleoprotein H OS=Homo sapiens (Human) GN=HNRNPH1 PE=1 SV=4	9.9e-125	0.98	0.984	ok								24150
245	D2HGG8	D2HGG8;G1L1D7	D2HGG8;G1L1D7	Putative uncharacterized protein	tr|D2HGG8|D2HGG8_AILME Putative uncharacterized protein OS=Ailuropoda melanoleuca (Giant panda) GN=PANDA_010114 PE=4 SV=1;tr|G1L1D7|G1L1D7_AILME Uncharacterized protein OS=Ailuropoda melanoleuca (Giant panda) GN=MYH3 PE=4 SV=1	---	83;83	10;10	8;8	2	83	10	8	29.5	223.07	1933	1933;1942	0	69.45				295	129;130;175;388;389;510;591;1028;1186;1304;1496;1606;1607;1608;1858;2062;2165;2192;2234;2242;2261;2262;2400;3287;3306;3366;3405;3531;3541;3542;3543;3764;3765;4010;4229;4524;4525;4528;4566;4595;4630;4684;4702;4703;4798;4942;4997;4998;5071;5072;5073;5389;5428;5675;5735;5736;5885;6312;6484;6557;6835;6896;6897;6930;6931;7158;7321;7374;7375;7430;7431;7767;7878;8021;8121;8306;8793;8932;9062;9144;9145;9…	False;False;False;False;False;False;False;False;True;False;False;False;False;False;False;True;False;False;False;False;False;False;False;False;True;False;True;True;False;False;False;True;True;False;False;False;False;False;False;False;False;False;False;False;False;False;False;False;False;False;False;True;False;False;False;False;False;False;False;False;False;False;False;False;False;False;False;False…	138;139;187;418;419;420;421;422;423;548;637;1098;1263;1386;1597;1712;1713;1714;1981;2200;2309;2310;2311;2340;2386;2394;2395;2416;2417;2563;3504;3505;3526;3587;3628;3762;3772;3773;3774;4011;4012;4274;4516;4836;4837;4838;4839;4840;4843;4882;4914;4951;5012;5038;5039;5148;5149;5309;5369;5370;5446;5447;5448;5788;5829;6102;6167;6168;6169;6170;6326;6327;6328;6867;7049;7128;7129;7434;7495;7496;7530;7531;…	7742;7743;7744;7745;7746;7747;7748;7749;7750;7751;7752;7753;7754;7755;7756;7757;7758;7759;7760;7761;7762;7763;7764;7765;7766;7767;7768;7769;7770;7771;7772;7773;7774;7775;7776;7777;7778;7779;7780;7781;7782;7783;7784;7785;7786;7787;7788;7789;7790;7791;7792;7793;7794;7795;7796;7797;7798;7799;7800;7801;7802;7803;7804;7805;7806;7807;7808;7809;7810;7811;7812;7813;7814;7815;7816;7817;7818;7819;7820;7821…					P11055	MYH3_HUMAN	Myosin-3 OS=Homo sapiens (Human) GN=MYH3 PE=1 SV=3	0	0.982	0.997	ok	5201100	5758800	4452100	4222100	4385400	4439500	4930300	5271800	4575100	4544300	5453200
246	D2HGH7	D2HGH7;G1M5T4	D2HGH7;G1M5T4	Putative uncharacterized protein	tr|D2HGH7|D2HGH7_AILME Putative uncharacterized protein OS=Ailuropoda melanoleuca (Giant panda) GN=PANDA_010132 PE=4 SV=1;tr|G1M5T4|G1M5T4_AILME S-(hydroxymethyl)glutathione dehydrogenase OS=Ailuropoda melanoleuca (Giant panda) GN=LOC100466093 PE=3 SV=1	---	9;9	9;9	7;7	2	9	9	7	26.5	39.594	373	373;865	0	29.106				296	273;3378;3846;4049;4050;4106;6021;8711;8727	True;True;True;True;True;True;True;True;True	288;3600;4096;4314;4315;4375;6471;9437;9455	14880;14881;14882;14883;14884;14885;14886;14887;14888;14889;14890;14891;14892;14893;14894;14895;14896;14897;14898;14899;14900;14901;14902;14903;14904;14905;14906;14907;14908;14909;14910;14911;14912;14913;14914;14915;14916;14917;14918;14919;14920;14921;14922;14923;14924;14925;14926;14927;14928;14929;214233;214234;214235;214236;214237;214238;214239;214240;214241;214242;249977;249978;249979;249980;2…	25614;25615;25616;25617;25618;25619;25620;25621;25622;25623;25624;25625;25626;25627;25628;25629;25630;25631;25632;25633;25634;25635;25636;25637;25638;25639;25640;25641;25642;25643;25644;25645;25646;25647;25648;25649;25650;25651;25652;25653;25654;25655;25656;25657;25658;25659;25660;25661;25662;25663;389659;389660;389661;389662;389663;389664;389665;389666;389667;389668;389669;455876;455877;455878;4…	25640;389666;455888;488399;488431;496534;763168;1092215;1095020			P11766	ADHX_HUMAN	Alcohol dehydrogenase class-3 OS=Homo sapiens (Human) GN=ADH5 PE=1 SV=4	4.5e-179	0.962	0.992	ok	48706	49542	252810	190010	217080	272970	259100	192730	185460	270520	89859
247	D2HGI0	D2HGI0;G1L9E3	D2HGI0;G1L9E3	Putative uncharacterized protein	tr|D2HGI0|D2HGI0_AILME Putative uncharacterized protein OS=Ailuropoda melanoleuca (Giant panda) GN=PANDA_010135 PE=3 SV=1;tr|G1L9E3|G1L9E3_AILME ATP-dependent 6-phosphofructokinase OS=Ailuropoda melanoleuca (Giant panda) GN=PFKP PE=3 SV=1	---	3;3	1;1	1;1	2	3	1	1	4.7	85.28	779	779;790	0	20.124				297	370;3035;8168	True;False;False	397;3235;8852;8853	27156;27157;27158;27159;27160;192968;192969;192970;192971;192972;192973;192974;192975;192976;192977;192978;192979;192980;192981;192982;192983;192984;192985;192986;192987;192988;192989;192990;192991;192992;550056;550057;550058;550059;550060;550061;550062;550063;550064;550065;550066;550067;550068;550069;550070;550071;550072;550073;550074;550075;550076;550077;550078;550079;550080;550081;550082;55008…	47978;47979;47980;47981;47982;352706;352707;352708;352709;352710;352711;352712;352713;352714;352715;352716;352717;352718;352719;352720;352721;352722;352723;352724;352725;352726;352727;352728;352729;352730;352731;352732;352733;352734;352735;352736;352737;352738;352739;352740;352741;352742;352743;352744;997065;997066;997067;997068;997069;997070;997071;997072;997073;997074;997075;997076;997077;99707…	47982;352715;997115	9	217	Q01813	PFKAP_HUMAN	ATP-dependent 6-phosphofructokinase, platelet type OS=Homo sapiens (Human) GN=PFKP PE=1 SV=2	0	0.909	0.972	ok
248	D2HGR2	D2HGR2	D2HGR2	Uncharacterized protein	tr|D2HGR2|D2HGR2_AILME Uncharacterized protein OS=Ailuropoda melanoleuca (Giant panda) GN=LOC100466250 PE=3 SV=1	LOC100466250	9	9	4	1	9	9	4	52.9	23.522	210	210	0	70.006				299	246;710;1699;2352;2707;6194;6195;7725;10107	True;True;True;True;True;True;True;True;True	259;764;1809;2511;2888;6697;6698;6699;6700;8379;10930	13901;13902;47650;47651;47652;47653;47654;47655;47656;47657;47658;47659;47660;47661;47662;47663;47664;47665;47666;47667;47668;47669;47670;47671;47672;47673;47674;47675;47676;47677;47678;47679;47680;112753;112754;112755;112756;112757;112758;112759;112760;112761;112762;112763;112764;112765;112766;112767;112768;112769;112770;112771;112772;112773;112774;112775;112776;112777;112778;112779;112780;11278…	24102;24103;82353;82354;82355;82356;82357;82358;82359;82360;82361;82362;82363;82364;82365;82366;82367;82368;82369;82370;82371;82372;82373;82374;82375;82376;82377;82378;82379;82380;82381;82382;82383;82384;82385;82386;82387;82388;82389;82390;82391;82392;82393;82394;82395;82396;82397;82398;82399;82400;82401;82402;82403;82404;82405;82406;82407;82408;82409;82410;82411;82412;207126;207127;207128;207129…	24103;82412;207202;280279;324072;787613;787642;942723;1264447	248	20	P09211	GSTP1_HUMAN	Glutathione S-transferase P OS=Homo sapiens (Human) GN=GSTP1 PE=1 SV=2	2.2e-88	0.857	0.967	ok	607770	551210	441230	690000	504000	512390	713050	880870	25365	14371	716440
249	D2HGR3	D2HGR3;G1L2L0	D2HGR3;G1L2L0	Putative uncharacterized protein	tr|D2HGR3|D2HGR3_AILME Putative uncharacterized protein OS=Ailuropoda melanoleuca (Giant panda) GN=PANDA_010233 PE=4 SV=1;tr|G1L2L0|G1L2L0_AILME Uncharacterized protein OS=Ailuropoda melanoleuca (Giant panda) GN=NDUFV1 PE=4 SV=1	---	23;23	23;23	23;23	2	23	23	23	63.6	48.219	440	440;465	0	175.09				300	103;1765;1939;2452;2842;2890;2929;2996;2998;3248;3535;3571;3955;4820;5412;5966;6299;6762;7012;8466;9740;9985;9986	True;True;True;True;True;True;True;True;True;True;True;True;True;True;True;True;True;True;True;True;True;True;True	109;1881;2069;2619;3033;3082;3123;3195;3197;3462;3766;3802;4216;5171;5813;6416;6852;7357;7620;9172;10535;10796;10797	5054;5055;5056;5057;5058;5059;5060;5061;5062;5063;5064;5065;5066;5067;5068;5069;5070;5071;5072;5073;5074;5075;5076;5077;5078;5079;5080;5081;5082;5083;5084;5085;5086;5087;5088;5089;5090;5091;5092;5093;5094;5095;5096;5097;5098;5099;5100;5101;5102;5103;5104;5105;115708;115709;115710;115711;115712;115713;115714;115715;115716;115717;115718;115719;115720;115721;115722;115723;115724;115725;115726;115727…	8108;8109;8110;8111;8112;8113;8114;8115;8116;8117;8118;8119;8120;8121;8122;8123;8124;8125;8126;8127;8128;8129;8130;8131;8132;8133;8134;8135;8136;8137;8138;8139;8140;8141;8142;8143;8144;8145;8146;8147;8148;8149;8150;8151;8152;8153;8154;8155;8156;8157;8158;8159;8160;8161;8162;8163;8164;8165;8166;8167;8168;8169;8170;212234;212235;212236;212237;212238;212239;212240;212241;212242;212243;212244;212245;…	8133;212239;228089;290622;338830;342509;345417;350047;350118;372041;423807;426658;469576;587667;677931;757102;800694;854212;874562;1027249;1231851;1252323;1252341			P49821	NDUV1_HUMAN	NADH dehydrogenase [ubiquinone] flavoprotein 1, mitochondrial OS=Homo sapiens (Human) GN=NDUFV1 PE=1 SV=4	0	0.97	0.991	ok	978950	901820	1167200	1320400	1201900	1133200	1050100	892490	1141500	1136100	954310
250	D2HH73	D2HH73	D2HH73	Uncharacterized protein	tr|D2HH73|D2HH73_AILME Uncharacterized protein OS=Ailuropoda melanoleuca (Giant panda) GN=ACTG2 PE=3 SV=1	ACTG2	36	9	1	1	36	9	1	86.4	41.876	376	376	0	323.31				301	281;850;851;966;1036;1037;1428;1429;1441;1585;1586;2009;2010;2028;2033;2723;3521;3522;3692;3693;3694;4035;4036;4098;4484;4568;4989;5026;6267;6781;7296;8018;8510;8667;8668;10001	False;False;False;False;False;False;False;False;True;False;False;False;False;True;True;False;False;False;False;False;False;False;False;False;True;True;True;False;True;True;False;False;True;False;False;False	297;917;918;1035;1106;1107;1108;1109;1110;1516;1517;1518;1519;1532;1533;1690;1691;2140;2141;2142;2162;2163;2168;2904;2905;2906;3751;3752;3931;3932;3933;3934;3935;3936;3937;4299;4300;4367;4791;4884;5359;5360;5398;6807;6808;6809;7376;7918;8694;9217;9218;9393;9394;10814;10815	15567;15568;15569;15570;15571;15572;15573;15574;15575;15576;15577;15578;15579;15580;15581;15582;15583;15584;15585;15586;15587;15588;15589;15590;15591;15592;15593;15594;15595;15596;15597;15598;15599;15600;15601;15602;15603;15604;15605;15606;15607;15608;15609;15610;15611;15612;15613;15614;15615;15616;15617;15618;15619;15620;15621;15622;15623;15624;15625;15626;15627;15628;15629;15630;15631;15632;156…					P63267	ACTH_HUMAN	Actin, gamma-enteric smooth muscle OS=Homo sapiens (Human) GN=ACTG2 PE=1 SV=1	1.2e-190	1	1	ok	43921000	23140000	23840000	27804000	27965000	20107000	27507000	33020000	34204000	31583000	25195000
251	D2HHB0	D2HHB0	D2HHB0	Uncharacterized protein	tr|D2HHB0|D2HHB0_AILME Uncharacterized protein OS=Ailuropoda melanoleuca (Giant panda) GN=RTCB PE=3 SV=1	RTCB	3	3	3	1	3	3	3	7.7	55.183	505	505	0.001443	5.2255				302	5513;6496;7017	True;True;True	5916;7061;7625	376094;376095;376096;376097;376098;376099;376100;376101;376102;448753;479064;479065;479066;479067;479068	689598;689599;689600;689601;689602;689603;689604;689605;689606;821715;875153;875154;875155;875156;875157	689602;821715;875155			Q9Y3I0	RTCB_HUMAN	tRNA-splicing ligase RtcB homolog OS=Homo sapiens (Human) GN=RTCB PE=1 SV=1	0	0.998	1	ok				26162	28195
252	D2HHJ7	D2HHJ7;G1LL04	D2HHJ7;G1LL04	Putative uncharacterized protein	tr|D2HHJ7|D2HHJ7_AILME Putative uncharacterized protein OS=Ailuropoda melanoleuca (Giant panda) GN=PANDA_010590 PE=4 SV=1;tr|G1LL04|G1LL04_AILME Uncharacterized protein OS=Ailuropoda melanoleuca (Giant panda) GN=PACSIN3 PE=4 SV=1	---	5;5	5;5	5;5	2	5	5	5	13.4	48.635	424	424;481	0	11.747				303	161;926;5774;7818;8231	True;True;True;True;True	173;995;6208;8484;8918	9372;9373;9374;9375;9376;9377;9378;9379;9380;9381;62057;62058;62059;62060;398817;398818;398819;398820;398821;398822;398823;398824;398825;398826;398827;398828;398829;398830;398831;398832;398833;398834;398835;398836;398837;398838;398839;398840;525623;553379;553380;553381;553382;553383;553384;553385;553386	16491;16492;16493;16494;16495;16496;16497;16498;16499;16500;106023;106024;106025;106026;729548;729549;729550;729551;729552;729553;729554;729555;729556;729557;729558;729559;729560;729561;729562;729563;729564;729565;729566;729567;729568;729569;729570;729571;952242;1002138;1002139;1002140;1002141;1002142;1002143;1002144;1002145	16492;106025;729569;952242;1002144			Q9UKS6	PACN3_HUMAN	Protein kinase C and casein kinase substrate in neurons protein 3 OS=Homo sapiens (Human) GN=PACSIN3 PE=1 SV=2	4.7e-121	0.958	0.988	ok			30622	28661			33124			24492
253	D2HHK5	D2HHK5;G1LLZ1	D2HHK5;G1LLZ1	Putative uncharacterized protein	tr|D2HHK5|D2HHK5_AILME Putative uncharacterized protein OS=Ailuropoda melanoleuca (Giant panda) GN=PANDA_010598 PE=3 SV=1;tr|G1LLZ1|G1LLZ1_AILME Uncharacterized protein OS=Ailuropoda melanoleuca (Giant panda) GN=PSMC3 PE=4 SV=1	---	5;4	5;4	5;4	2	5	5	5	17.8	49.217	439	439;491	0	14.953				304	1584;2021;7203;8375;8747	True;True;True;True;True	1689;2154;7819;9073;9477	104767;132740;132741;132742;132743;132744;132745;132746;132747;132748;489731;489732;489733;489734;489735;489736;489737;489738;489739;489740;489741;561855;561856;561857;561858;603467;603468;603469;603470;603471;603472;603473;603474;603475;603476;603477;603478;603479;603480;603481;603482;603483;603484;603485;603486;603487;603488;603489;603490;603491;603492	190899;244666;244667;244668;244669;244670;244671;244672;244673;244674;892123;892124;892125;892126;892127;892128;892129;892130;892131;892132;892133;892134;892135;892136;1016790;1016791;1016792;1016793;1096551;1096552;1096553;1096554;1096555;1096556;1096557;1096558;1096559;1096560;1096561;1096562;1096563;1096564;1096565;1096566;1096567;1096568;1096569;1096570;1096571;1096572;1096573;1096574;1096575…	190899;244666;892125;1016790;1096555			P17980	PRS6A_HUMAN	26S protease regulatory subunit 6A OS=Homo sapiens (Human) GN=PSMC3 PE=1 SV=3	1.7e-188	0.995	1	ok			30959	31711
254	D2HHK9	D2HHK9;G1LM91	D2HHK9;G1LM91	Putative uncharacterized protein	tr|D2HHK9|D2HHK9_AILME Putative uncharacterized protein OS=Ailuropoda melanoleuca (Giant panda) GN=PANDA_010603 PE=3 SV=1;tr|G1LM91|G1LM91_AILME Uncharacterized protein OS=Ailuropoda melanoleuca (Giant panda) GN=NDUFS3 PE=3 SV=1	---	14;14	14;14	14;14	2	14	14	14	62.1	25.577	219	219;269	0	223.2				305	63;1223;2017;2494;2514;4177;4563;4601;7087;7114;7688;8599;9542;9543	True;True;True;True;True;True;True;True;True;True;True;True;True;True	68;1303;2149;2150;2664;2684;4452;4879;4920;7696;7726;8339;9315;10318;10319	2887;2888;2889;2890;2891;2892;2893;2894;2895;2896;76830;76831;76832;76833;76834;76835;76836;76837;76838;76839;76840;76841;76842;76843;76844;76845;76846;76847;76848;76849;76850;132413;132414;132415;132416;132417;132418;132419;132420;132421;132422;132423;132424;132425;132426;132427;132428;132429;132430;132431;132432;132433;132434;132435;132436;132437;132438;132439;132440;132441;132442;132443;132444…	4234;4235;4236;4237;4238;4239;4240;4241;4242;4243;4244;4245;132580;132581;132582;132583;132584;132585;132586;132587;132588;132589;132590;132591;132592;132593;132594;132595;132596;132597;132598;132599;132600;132601;132602;132603;132604;132605;132606;132607;132608;132609;132610;132611;132612;132613;132614;132615;132616;132617;132618;132619;132620;132621;132622;132623;132624;132625;132626;132627;132…	4235;132614;243900;295285;303072;504890;556919;561360;883683;885336;939724;1052108;1200084;1200167	257	128	O75489	NDUS3_HUMAN	NADH dehydrogenase [ubiquinone] iron-sulfur protein 3, mitochondrial OS=Homo sapiens (Human) GN=NDUFS3 PE=1 SV=1	2.2e-119	0.95	0.995	ok	1011900	1020200	970410	1128900	1204100	1320100	858570	767910	1294300	1123700	1044800
255	D2HHL1	D2HHL1	D2HHL1	Uncharacterized protein	tr|D2HHL1|D2HHL1_AILME Uncharacterized protein OS=Ailuropoda melanoleuca (Giant panda) GN=MTCH2 PE=3 SV=1	MTCH2	8	8	8	1	8	8	8	33.7	33.427	303	303	0	55.905				306	116;1834;2402;3156;3237;4981;7421;7795	True;True;True;True;True;True;True;True	125;1953;2565;3362;3451;5351;8052;8459	7150;7151;7152;7153;7154;7155;7156;7157;7158;7159;7160;7161;7162;7163;7164;7165;7166;7167;7168;7169;7170;7171;7172;7173;7174;7175;118693;155603;155604;200522;200523;200524;200525;200526;200527;200528;200529;200530;200531;200532;200533;200534;200535;200536;200537;200538;200539;200540;200541;200542;200543;200544;200545;200546;200547;200548;200549;200550;200551;204802;204803;204804;204805;337515;337…	12841;12842;12843;12844;12845;12846;12847;12848;12849;12850;12851;12852;12853;12854;12855;12856;12857;12858;12859;12860;12861;12862;12863;12864;12865;12866;216612;285344;285345;364160;364161;364162;364163;364164;364165;364166;364167;364168;364169;364170;364171;364172;364173;364174;364175;364176;364177;364178;364179;364180;364181;364182;364183;364184;364185;364186;364187;364188;364189;364190;37165…	12863;216612;285345;364163;371651;607998;915178;949911			Q9Y6C9	MTCH2_HUMAN	Mitochondrial carrier homolog 2 OS=Homo sapiens (Human) GN=MTCH2 PE=1 SV=1	4.2e-145	0.944	0.98	ok	56090	28388		171090	153650	231810	87779	120370	170310	111460	91500
256	D2HHL9	D2HHL9;G1L6D0	D2HHL9;G1L6D0	Putative uncharacterized protein	tr|D2HHL9|D2HHL9_AILME Putative uncharacterized protein OS=Ailuropoda melanoleuca (Giant panda) GN=PANDA_010617 PE=4 SV=1;tr|G1L6D0|G1L6D0_AILME Uncharacterized protein OS=Ailuropoda melanoleuca (Giant panda) GN=ETFDH PE=4 SV=1	---	23;23	23;23	23;23	2	23	23	23	43.6	67.825	608	608;617	0	124.56				307	75;238;499;573;1174;2162;2477;2554;2861;3061;3213;3603;3604;4273;5708;5879;6536;7598;8254;8255;8744;9499;10024	True;True;True;True;True;True;True;True;True;True;True;True;True;True;True;True;True;True;True;True;True;True;True	80;251;537;619;1251;2304;2644;2727;3052;3261;3422;3836;3837;4563;6135;6318;7102;8243;8943;8944;9474;10271;10839	3592;3593;3594;3595;3596;3597;3598;3599;3600;3601;3602;3603;3604;3605;3606;3607;3608;3609;3610;3611;3612;3613;3614;3615;3616;3617;3618;13456;13457;13458;13459;13460;13461;13462;13463;13464;13465;13466;13467;13468;13469;13470;13471;13472;13473;13474;13475;13476;13477;13478;13479;13480;13481;13482;13483;13484;13485;13486;13487;13488;13489;13490;13491;34358;34359;34360;34361;34362;34363;34364;34365;…	5328;5329;5330;5331;5332;5333;5334;5335;5336;5337;5338;5339;5340;5341;5342;5343;5344;5345;5346;5347;5348;5349;5350;5351;5352;5353;5354;23486;23487;23488;23489;23490;23491;23492;23493;23494;23495;23496;23497;23498;23499;23500;23501;23502;23503;23504;23505;23506;23507;23508;23509;23510;23511;23512;23513;23514;23515;23516;23517;23518;23519;23520;23521;23522;23523;23524;23525;23526;23527;23528;23529;…	5339;23504;59515;68296;127950;260017;293477;310065;339972;354726;368912;430152;430177;517005;717301;745272;831827;931677;1005521;1005542;1096303;1196673;1257153			Q16134	ETFD_HUMAN	Electron transfer flavoprotein-ubiquinone oxidoreductase, mitochondrial OS=Homo sapiens (Human) GN=ETFDH PE=1 SV=2	0	0.952	0.99	OK	392570	487970	634610	641230	591670	588670	396560	567180	505480	464950	337850
257	D2HHR4	D2HHR4	D2HHR4	Uncharacterized protein	tr|D2HHR4|D2HHR4_AILME Uncharacterized protein OS=Ailuropoda melanoleuca (Giant panda) GN=NNT PE=4 SV=1	NNT	24	24	24	1	24	24	24	27.4	113.62	1086	1086	0	74.205				308	9;37;387;617;638;685;909;1751;1873;1982;2385;2532;2553;3470;5156;6108;6466;6833;7448;7722;7726;8529;8653;9497	True;True;True;True;True;True;True;True;True;True;True;True;True;True;True;True;True;True;True;True;True;True;True;True	10;39;417;665;666;689;738;978;1865;1997;2113;2547;2704;2726;3698;5539;6568;7030;7432;8085;8376;8380;9238;9374;10269	385;386;387;388;389;390;391;1742;1743;1744;1745;1746;1747;1748;1749;1750;1751;1752;1753;1754;1755;1756;1757;1758;1759;1760;1761;1762;1763;1764;1765;1766;1767;1768;1769;1770;1771;1772;1773;1774;1775;1776;1777;28404;28405;28406;28407;28408;42449;42450;42451;42452;42453;42454;42455;42456;42457;42458;42459;42460;42461;42462;42463;42464;42465;42466;42467;42468;42469;42470;42471;42472;42473;42474;42475…	494;495;496;497;498;499;500;2625;2626;2627;2628;2629;2630;2631;2632;2633;2634;2635;2636;2637;2638;2639;2640;2641;2642;2643;2644;2645;2646;2647;2648;2649;2650;2651;2652;2653;2654;2655;2656;2657;2658;2659;2660;2661;50395;50396;50397;50398;50399;74135;74136;74137;74138;74139;74140;74141;74142;74143;74144;74145;74146;74147;74148;74149;74150;74151;74152;74153;74154;74155;74156;74157;74158;74159;74160;…	499;2628;50396;74153;76022;79735;104662;211707;220882;230780;284664;308819;310047;402560;644459;770891;816696;856606;917691;942604;942727;1039860;1060999;1196633	258	132	Q13423	NNTM_HUMAN	NAD(P) transhydrogenase, mitochondrial OS=Homo sapiens (Human) GN=NNT PE=1 SV=3	0	0.965	0.993	ok	288530	290390	815990	749610	386510	439550	477100	499380	246270	267270	145010
258	D2HHR7	D2HHR7;G1LZF5	D2HHR7;G1LZF5	Putative uncharacterized protein	tr|D2HHR7|D2HHR7_AILME Putative uncharacterized protein OS=Ailuropoda melanoleuca (Giant panda) GN=PANDA_010673 PE=4 SV=1;tr|G1LZF5|G1LZF5_AILME Uncharacterized protein OS=Ailuropoda melanoleuca (Giant panda) GN=APOH PE=4 SV=1	---	3;3	3;3	3;3	2	3	3	3	12	34.66	309	309;345	0.0014205	4.9426				309	2462;2774;3818	True;True;True	2629;2959;4066	158938;158939;158940;158941;158942;158943;158944;158945;158946;158947;158948;158949;158950;158951;158952;179206;179207;248808	291633;291634;291635;291636;291637;291638;291639;291640;291641;291642;291643;291644;291645;291646;291647;291648;291649;291650;329440;329441;454030	291635;329441;454030			P02749	APOH_HUMAN	Beta-2-glycoprotein 1 OS=Homo sapiens (Human) GN=APOH PE=1 SV=3	1.1e-109	0.78	0.935	not checked		46688	51651	41565						30253	60422
259	D2HHZ6	D2HHZ6;G1LFQ4	D2HHZ6;G1LFQ4	Malate dehydrogenase	tr|D2HHZ6|D2HHZ6_AILME Malate dehydrogenase OS=Ailuropoda melanoleuca (Giant panda) GN=PANDA_010775 PE=3 SV=1;tr|G1LFQ4|G1LFQ4_AILME Malate dehydrogenase OS=Ailuropoda melanoleuca (Giant panda) GN=MDH1 PE=3 SV=1	---	19;19	19;19	19;19	2	19	19	19	68.3	36.383	334	334;348	0	323.31				311	356;1346;1365;1632;1633;2032;2043;2178;2314;2375;2376;2928;4444;5286;5833;6711;7449;9036;9182	True;True;True;True;True;True;True;True;True;True;True;True;True;True;True;True;True;True;True	382;1431;1451;1452;1739;1740;2167;2178;2324;2473;2537;2538;3122;4749;5677;6269;6270;7302;8086;9785;9939	26816;26817;26818;26819;26820;26821;26822;26823;26824;26825;26826;26827;26828;26829;84572;84573;84574;84575;84576;85144;85145;85146;85147;85148;85149;85150;85151;85152;85153;85154;85155;85156;85157;85158;85159;85160;85161;85162;85163;85164;85165;85166;85167;85168;85169;85170;85171;85172;85173;85174;85175;85176;85177;85178;85179;85180;85181;85182;85183;85184;85185;85186;85187;85188;85189;85190;851…	47542;47543;47544;47545;47546;47547;47548;47549;47550;47551;47552;47553;47554;47555;145637;145638;145639;145640;145641;146504;146505;146506;146507;146508;146509;146510;146511;146512;146513;146514;146515;146516;146517;146518;146519;146520;146521;146522;146523;146524;146525;146526;146527;146528;146529;146530;146531;146532;146533;146534;146535;146536;146537;146538;146539;146540;146541;146542;146543;…	47550;145637;146881;200237;200510;245459;246737;260716;278402;283622;284151;345193;538668;663450;734771;850416;917721;1140292;1160578	259	90	P40925	MDHC_HUMAN	Malate dehydrogenase, cytoplasmic OS=Homo sapiens (Human) GN=MDH1 PE=1 SV=4	1.9e-209	0.955	0.994	ok	6940300	7141800	8150600	8547500	10206000	9608000	7513700	7302100	10687000	10158000	6112600
260	D2HI35	D2HI35;G1LJ80	D2HI35;G1LJ80	5'-nucleotidase	tr|D2HI35|D2HI35_AILME 5-nucleotidase OS=Ailuropoda melanoleuca (Giant panda) GN=PANDA_010820 PE=3 SV=1;tr|G1LJ80|G1LJ80_AILME 5-nucleotidase OS=Ailuropoda melanoleuca (Giant panda) GN=NT5C3A PE=3 SV=1	---	3;3	3;3	3;3	2	3	3	3	10.6	32.996	293	293;297	0	17.91				312	2936;7625;8798	True;True;True	3131;8273;9533	188774;514367;514368;514369;514370;514371;514372;514373;514374;514375;514376;514377;514378;514379;514380;514381;514382;514383;514384;514385;514386;514387;607631;607632;607633;607634;607635;607636;607637;607638;607639;607640;607641;607642;607643;607644;607645;607646;607647;607648;607649;607650;607651;607652;607653;607654;607655;607656;607657;607658;607659;607660;607661;607662	345571;933311;933312;933313;933314;933315;933316;933317;933318;933319;933320;933321;933322;933323;933324;933325;933326;933327;933328;933329;933330;933331;1104224;1104225;1104226;1104227;1104228;1104229;1104230;1104231;1104232;1104233;1104234;1104235;1104236;1104237;1104238;1104239;1104240;1104241;1104242;1104243;1104244;1104245;1104246;1104247;1104248;1104249;1104250;1104251;1104252;1104253;11042…	345571;933317;1104249			Q9H0P0	5NT3A_HUMAN	Cytosolic 5'-nucleotidase 3A OS=Homo sapiens (Human) GN=NT5C3A PE=1 SV=3	8.2e-164	0.908	0.976	ok						41778	39749	37596		53793
261	D2HI44	D2HI44	D2HI44	Adenylate kinase	tr|D2HI44|D2HI44_AILME Adenylate kinase OS=Ailuropoda melanoleuca (Giant panda) GN=AK2 PE=3 SV=1	AK2	9	9	9	1	9	9	9	43.2	26.628	241	241	0	56.579				313	566;867;2030;3089;4323;5042;5066;6421;6894	True;True;True;True;True;True;True;True;True	612;934;2165;3290;4617;5415;5441;6982;7493	38811;38812;38813;38814;38815;38816;38817;38818;38819;38820;58477;58478;58479;58480;58481;58482;58483;133202;133203;133204;133205;133206;133207;133208;196152;196153;196154;196155;196156;196157;196158;196159;196160;196161;196162;196163;196164;196165;196166;196167;196168;196169;196170;196171;196172;196173;287704;287705;345137;346155;346156;346157;346158;346159;346160;346161;346162;346163;346164;346…	67760;67761;67762;67763;67764;67765;67766;67767;67768;67769;100937;100938;100939;100940;100941;100942;100943;245401;245402;245403;245404;245405;245406;245407;357050;357051;357052;357053;357054;357055;357056;357057;357058;357059;357060;357061;357062;357063;357064;357065;357066;357067;357068;357069;357070;357071;357072;357073;357074;357075;357076;357077;357078;357079;525524;525525;632454;633891;633…	67768;100942;245405;357057;525525;632454;633921;814292;861735			P54819	KAD2_HUMAN	Adenylate kinase 2, mitochondrial OS=Homo sapiens (Human) GN=AK2 PE=1 SV=2	7.2e-88	0.95	0.979	ok	83111	78682	83905	81139	132650	105420	98736	84503	108950	122890	89546
262	D2HIA3	D2HIA3;G1LD20	D2HIA3;G1LD20	Putative uncharacterized protein	tr|D2HIA3|D2HIA3_AILME Putative uncharacterized protein OS=Ailuropoda melanoleuca (Giant panda) GN=PANDA_010912 PE=4 SV=1;tr|G1LD20|G1LD20_AILME Uncharacterized protein OS=Ailuropoda melanoleuca (Giant panda) GN=SERBP1 PE=4 SV=1	---	3;3	3;3	3;3	2	3	3	3	10.9	43.514	393	393;407	0	38.547				314	2496;7354;7419	True;True;True	2666;7980;8050	161130;499660;499661;499662;499663;499664;499665;503700;503701;503702;503703;503704;503705;503706;503707;503708;503709;503710;503711;503712;503713	295779;909430;909431;909432;909433;909434;909435;915137;915138;915139;915140;915141;915142;915143;915144;915145;915146;915147;915148;915149;915150	295779;909431;915145			Q8NC51	PAIRB_HUMAN	Plasminogen activator inhibitor 1 RNA-binding protein OS=Homo sapiens (Human) GN=SERBP1 PE=1 SV=2	1.1e-108	0.982	0.985	ok				14130	17954			16151
263	D2HIM0	D2HIM0;G1LFW7	D2HIM0;G1LFW7	Putative uncharacterized protein	tr|D2HIM0|D2HIM0_AILME Putative uncharacterized protein OS=Ailuropoda melanoleuca (Giant panda) GN=PANDA_011062 PE=4 SV=1;tr|G1LFW7|G1LFW7_AILME Uncharacterized protein OS=Ailuropoda melanoleuca (Giant panda) GN=GPT PE=4 SV=1	---	7;7	7;7	4;4	2	7	7	4	19.5	53.943	488	488;548	0	30.432				315	430;453;1246;1777;5528;5873;9171	True;True;True;True;True;True;True	466;489;1328;1894;5931;6312;9928	31358;31359;31360;32394;32395;32396;32397;32398;32399;32400;32401;32402;32403;32404;32405;32406;32407;32408;32409;32410;32411;77775;77776;77777;77778;77779;77780;77781;77782;77783;77784;116502;116503;377269;377270;377271;377272;377273;377274;377275;377276;377277;377278;377279;377280;377281;377282;377283;377284;377285;377286;377287;377288;377289;377290;377291;377292;377293;377294;377295;377296;377…	55063;55064;55065;56555;56556;56557;56558;56559;56560;56561;56562;56563;56564;56565;56566;56567;56568;56569;56570;56571;56572;134062;134063;134064;134065;134066;134067;134068;134069;134070;134071;213567;213568;691651;691652;691653;691654;691655;691656;691657;691658;691659;691660;691661;691662;691663;691664;691665;691666;691667;691668;691669;691670;691671;691672;691673;691674;691675;691676;691677;…	55065;56566;134065;213567;691677;744864;1159947			P24298	ALAT1_HUMAN	Alanine aminotransferase 1 OS=Homo sapiens (Human) GN=GPT PE=1 SV=3	3.8e-199	0.875	0.948	not checked	21952	43425	126270	104200		49151	39767	88548	44666	25105	82414
264	D2HIN7	D2HIN7;G1LHJ1	D2HIN7;G1LHJ1	Putative uncharacterized protein	tr|D2HIN7|D2HIN7_AILME Putative uncharacterized protein OS=Ailuropoda melanoleuca (Giant panda) GN=PANDA_011086 PE=4 SV=1;tr|G1LHJ1|G1LHJ1_AILME Uncharacterized protein OS=Ailuropoda melanoleuca (Giant panda) GN=CYC1 PE=4 SV=1	---	11;11	11;11	11;11	2	11	11	11	43.5	31.272	283	283;338	0	233.35				316	60;420;1620;3177;3178;3583;3655;5781;5782;6881;9669	True;True;True;True;True;True;True;True;True;True;True	65;454;455;456;1727;3384;3385;3814;3891;6215;6216;7480;10459	2730;2731;2732;2733;2734;2735;2736;2737;2738;2739;2740;2741;2742;2743;2744;2745;2746;2747;2748;2749;2750;2751;2752;2753;2754;2755;2756;2757;2758;2759;2760;2761;2762;2763;2764;2765;2766;2767;2768;2769;2770;2771;2772;2773;2774;2775;2776;2777;2778;2779;2780;2781;2782;2783;30841;30842;30843;30844;30845;30846;30847;30848;30849;30850;30851;30852;30853;30854;30855;30856;30857;30858;30859;30860;30861;308…	3971;3972;3973;3974;3975;3976;3977;3978;3979;3980;3981;3982;3983;3984;3985;3986;3987;3988;3989;3990;3991;3992;3993;3994;3995;3996;3997;3998;3999;4000;4001;4002;4003;4004;4005;4006;4007;4008;4009;4010;4011;4012;4013;4014;4015;4016;4017;4018;4019;4020;4021;4022;4023;4024;4025;4026;4027;4028;4029;4030;4031;4032;4033;4034;4035;4036;4037;4038;4039;4040;4041;4042;4043;4044;4045;4046;4047;4048;4049;4050…	4030;54171;197829;365924;365937;427315;436241;729935;730021;859035;1218271	260;261	122;124	P08574	CY1_HUMAN	Cytochrome c1, heme protein, mitochondrial OS=Homo sapiens (Human) GN=CYC1 PE=1 SV=3	4.2e-127	0.926	0.982	ok	1854100	1966000	1773500	1858300	2648400	2249500	1305900	1563000	2140700	2001700	1661900
265	G1LJ43	G1LJ43;D2HIP6	G1LJ43;D2HIP6	Uncharacterized protein	tr|G1LJ43|G1LJ43_AILME Uncharacterized protein OS=Ailuropoda melanoleuca (Giant panda) GN=EEF1D PE=3 SV=1;tr|D2HIP6|D2HIP6_AILME Putative uncharacterized protein OS=Ailuropoda melanoleuca (Giant panda) GN=PANDA_011107 PE=3 SV=1	EEF1D	4;4	4;4	4;4	2	4	4	4	8.7	63.003	572	572;644	0	15.923				317	759;3477;3795;7994	True;True;True;True	817;3705;4042;8670	49817;222257;222258;222259;222260;222261;222262;222263;222264;222265;222266;222267;222268;247312;247313;247314;247315;247316;247317;247318;247319;247320;247321;247322;535514;535515;535516	85377;405828;405829;405830;405831;405832;405833;405834;405835;405836;405837;405838;405839;405840;405841;405842;405843;405844;405845;451721;451722;451723;451724;451725;451726;451727;451728;451729;451730;451731;966326;966327;966328	85377;405843;451724;966327			P29692	EF1D_HUMAN	Elongation factor 1-delta OS=Homo sapiens (Human) GN=EEF1D PE=1 SV=5	4.1e-87	0.918	0.979	ok		45651	70384	64293					47188	52630
266	G1LF77	G1LF77;D2HIQ3	G1LF77;D2HIQ3	Uncharacterized protein	tr|G1LF77|G1LF77_AILME Uncharacterized protein OS=Ailuropoda melanoleuca (Giant panda) GN=LOC100474980 PE=3 SV=1;tr|D2HIQ3|D2HIQ3_AILME Putative uncharacterized protein OS=Ailuropoda melanoleuca (Giant panda) GN=PANDA_011114 PE=3 SV=1	LOC100474980	12;12	3;3	2;2	2	12	3	2	34.7	46.037	404	404;406	0.0027586	4.3953				318	136;137;1554;4123;5068;5605;6036;7870;8245;8556;9846;10051	True;True;False;False;False;False;False;False;False;False;True;False	145;146;1656;4394;5443;6027;6486;8538;8933;9269;10652;10869	8180;8181;8182;103481;103482;103483;103484;103485;103486;103487;103488;273599;273600;273601;273602;273603;273604;273605;273606;273607;346208;346209;346210;384376;384377;384378;384379;384380;384381;418237;418238;418239;418240;418241;418242;418243;418244;418245;418246;418247;418248;418249;418250;418251;418252;418253;418254;418255;528410;528411;528412;554911;554912;554913;554914;554915;576399;576400…	14732;14733;14734;188892;188893;188894;188895;188896;188897;188898;188899;498779;498780;498781;498782;498783;498784;498785;498786;498787;633952;633953;633954;703598;703599;703600;703601;703602;703603;766154;766155;766156;766157;766158;766159;766160;766161;766162;766163;766164;766165;766166;766167;766168;766169;766170;766171;766172;766173;766174;766175;766176;956139;956140;956141;1004984;1004985;1…	14732;14734;188898;498779;633953;703601;766170;956141;1004985;1044560;1242651;1260538			O76009	KT33A_HUMAN	Keratin, type I cuticular Ha3-I OS=Homo sapiens (Human) GN=KRT33A PE=2 SV=2	6.1e-94	0.893	0.96	ok					43643			27484
267	D2HIQ6	D2HIQ6;D2HIQ7	D2HIQ6;D2HIQ7	Putative uncharacterized protein	tr|D2HIQ6|D2HIQ6_AILME Putative uncharacterized protein OS=Ailuropoda melanoleuca (Giant panda) GN=PANDA_011119 PE=3 SV=1;tr|D2HIQ7|D2HIQ7_AILME Uncharacterized protein OS=Ailuropoda melanoleuca (Giant panda) GN=KRT38 PE=3 SV=1	---	8;8	6;6	2;2	2	8	6	2	23.8	48.248	433	433;458	0	24.692				319	135;2571;4875;4926;5045;5067;7111;8557	True;True;False;True;True;True;False;True	144;2745;5231;5288;5418;5442;7723;9270	8176;8177;8178;8179;168579;329896;329897;329898;329899;329900;329901;329902;329903;329904;329905;329906;329907;329908;329909;329910;329911;329912;329913;329914;329915;329916;329917;329918;329919;329920;329921;329922;329923;329924;329925;329926;329927;332077;345278;346202;346203;346204;346205;346206;346207;485206;485207;485208;485209;485210;576417;576418;576419;576420;576421;576422;576423;576424;5…	14728;14729;14730;14731;311432;593810;593811;593812;593813;593814;593815;593816;593817;593818;593819;593820;593821;593822;593823;593824;593825;593826;593827;593828;593829;593830;593831;593832;593833;593834;593835;593836;593837;593838;593839;593840;593841;593842;593843;593844;593845;593846;597066;632661;633946;633947;633948;633949;633950;633951;885198;885199;885200;885201;885202;1044580;1044581;10…	14730;311432;593819;597066;632661;633949;885202;1044584			O76014	KRT37_HUMAN	Keratin, type I cuticular Ha7 OS=Homo sapiens (Human) GN=KRT37 PE=3 SV=3	6.4e-92	0.76	0.881	ok			75054	52817
268	D2HIT5	D2HIT5	D2HIT5	Uncharacterized protein	tr|D2HIT5|D2HIT5_AILME Uncharacterized protein OS=Ailuropoda melanoleuca (Giant panda) GN=PTRF PE=4 SV=1	PTRF	12	12	12	1	12	12	12	29	43.332	390	390	0	86.185				320	1708;1904;4048;4319;4714;4804;6893;7492;7578;9196;9197;9290	True;True;True;True;True;True;True;True;True;True;True;True	1819;2030;4313;4613;5053;5155;7492;8130;8223;9955;9956;10058	113054;122916;122917;122918;122919;122920;122921;122922;122923;122924;122925;122926;267611;267612;267613;267614;267615;267616;267617;267618;267619;267620;267621;267622;267623;267624;267625;267626;267627;267628;267629;267630;267631;267632;267633;267634;267635;267636;267637;267638;267639;267640;267641;267642;267643;267644;267645;267646;267647;267648;267649;267650;267651;267652;267653;267654;267655;…	207555;224630;224631;224632;224633;224634;224635;224636;224637;224638;224639;224640;488236;488237;488238;488239;488240;488241;488242;488243;488244;488245;488246;488247;488248;488249;488250;488251;488252;488253;488254;488255;488256;488257;488258;488259;488260;488261;488262;488263;488264;488265;488266;488267;488268;488269;488270;488271;488272;488273;488274;488275;488276;488277;488278;488279;488280;…	207555;224638;488344;525450;576873;587164;861724;920478;930176;1161526;1161542;1173110			Q6NZI2	PTRF_HUMAN	Polymerase I and transcript release factor OS=Homo sapiens (Human) GN=PTRF PE=1 SV=1	4.9e-120	0.944	0.974	ok	153220	192890	198160	185660	136090	114530	186760	161010	145380	133150	176580
269	D2HIW0	D2HIW0;G1LZI4	D2HIW0;G1LZI4	Putative uncharacterized protein	tr|D2HIW0|D2HIW0_AILME Putative uncharacterized protein OS=Ailuropoda melanoleuca (Giant panda) GN=PANDA_011189 PE=3 SV=1;tr|G1LZI4|G1LZI4_AILME Uncharacterized protein OS=Ailuropoda melanoleuca (Giant panda) GN=CCT2 PE=3 SV=1	---	10;10	10;10	10;10	2	10	10	10	29.2	56.52	527	527;534	0	24.607				321	744;2866;4923;5231;5835;6198;6902;6903;7727;9325	True;True;True;True;True;True;True;True;True;True	802;3057;5283;5619;6272;6703;7501;7502;8381;10093	49384;49385;49386;49387;49388;49389;49390;49391;49392;49393;49394;49395;49396;49397;49398;49399;49400;49401;49402;49403;49404;49405;49406;49407;49408;49409;49410;49411;49412;49413;49414;49415;49416;49417;185293;185294;185295;185296;185297;185298;185299;185300;185301;185302;185303;185304;185305;185306;185307;185308;331286;331287;331288;331289;331290;331291;331292;331293;331294;331295;331296;331297…	84772;84773;84774;84775;84776;84777;84778;84779;84780;84781;84782;84783;84784;84785;84786;84787;84788;84789;84790;84791;84792;84793;84794;84795;84796;84797;84798;84799;84800;84801;84802;84803;84804;84805;84806;84807;340009;340010;340011;340012;340013;340014;340015;340016;340017;340018;340019;340020;340021;340022;340023;340024;340025;340026;340027;595439;595440;595441;595442;595443;595444;595445;5…	84796;340024;595440;652172;734794;787694;863474;863475;942736;1178140			P78371	TCPB_HUMAN	T-complex protein 1 subunit beta OS=Homo sapiens (Human) GN=CCT2 PE=1 SV=4	2.9e-216	0.985	0.996	ok	57383	66428	83963	97972	82930	46336	57813	57522	80839	82445	28521
270	D2HJ02	D2HJ02	D2HJ02	Uncharacterized protein	tr|D2HJ02|D2HJ02_AILME Uncharacterized protein OS=Ailuropoda melanoleuca (Giant panda) GN=ENO2 PE=3 SV=1	ENO2	7	2	2	1	7	2	2	24.4	47.228	434	434	0	89.777				322	96;97;114;1259;2537;3613;7592	False;False;False;True;False;True;False	102;103;123;1341;2709;3846;8237	4343;4344;4345;4346;4347;4348;4349;4350;4351;4352;4353;4354;4355;4356;4357;4358;4359;4360;4361;4362;4363;4364;4365;4366;4367;4368;4369;4370;4371;4372;4373;4374;4375;4376;4377;4378;4379;4380;4381;4382;4383;4384;4385;4386;4387;4388;4389;4390;4391;4392;4393;4394;4395;4396;4397;4398;4399;4400;4401;4402;4403;4404;4405;4406;4407;4408;4409;4410;4411;4412;4413;4414;4415;4416;4417;4418;4419;4420;4421;4422…	6403;6404;6405;6406;6407;6408;6409;6410;6411;6412;6413;6414;6415;6416;6417;6418;6419;6420;6421;6422;6423;6424;6425;6426;6427;6428;6429;6430;6431;6432;6433;6434;6435;6436;6437;6438;6439;6440;6441;6442;6443;6444;6445;6446;6447;6448;6449;6450;6451;6452;6453;6454;6455;6456;6457;6458;6459;6460;6461;6462;6463;6464;6465;6466;6467;6468;6469;6470;6471;6472;6473;6474;6475;6476;6477;6478;6479;6480;6481;6482…	6973;7762;12780;135277;309197;431005;931230			P09104	ENOG_HUMAN	Gamma-enolase OS=Homo sapiens (Human) GN=ENO2 PE=1 SV=3	7.2e-186	0.988	1	ok	403200	239290	433440	359680	290390	82419	315700	789930	632710	466210	517680
271	D2HJ05	D2HJ05	D2HJ05	Triosephosphate isomerase	tr|D2HJ05|D2HJ05_AILME Triosephosphate isomerase OS=Ailuropoda melanoleuca (Giant panda) GN=TPI1 PE=3 SV=1	TPI1	19	19	19	1	19	19	19	81.7	28.098	263	263	0	323.31				323	1144;2053;2534;3722;3804;4083;4603;4758;6508;7306;7811;8079;8643;8976;8977;9251;9513;9565;9592	True;True;True;True;True;True;True;True;True;True;True;True;True;True;True;True;True;True;True	1219;2189;2706;3968;4051;4350;4922;5103;7073;7928;8476;8761;9361;9718;9719;10015;10288;10289;10349;10378	72826;72827;72828;72829;72830;72831;72832;72833;72834;72835;72836;72837;72838;72839;72840;72841;72842;72843;72844;72845;72846;72847;72848;72849;72850;72851;72852;72853;72854;72855;72856;72857;72858;72859;72860;72861;72862;72863;72864;72865;72866;72867;72868;72869;72870;72871;72872;72873;72874;72875;72876;72877;72878;72879;72880;72881;72882;72883;72884;72885;72886;72887;72888;72889;72890;72891;728…	124893;124894;124895;124896;124897;124898;124899;124900;124901;124902;124903;124904;124905;124906;124907;124908;124909;124910;124911;124912;124913;124914;124915;124916;124917;124918;124919;124920;124921;124922;124923;124924;124925;124926;124927;124928;124929;124930;124931;124932;124933;124934;124935;124936;124937;124938;124939;124940;124941;124942;124943;124944;124945;124946;124947;124948;124949;…				P60174	TPIS_HUMAN	Triosephosphate isomerase OS=Homo sapiens (Human) GN=TPI1 PE=1 SV=3	8.6e-160	0.958	0.977	ok	21011000	20393000	19643000	19150000	26777000	27708000	22450000	21544000	34514000	32402000	21937000
272	G1M5W5	G1M5W5;D2HJ06	G1M5W5;D2HJ06;G1LWT2;D2GUD7	Uncharacterized protein	tr|G1M5W5|G1M5W5_AILME Uncharacterized protein OS=Ailuropoda melanoleuca (Giant panda) GN=USP5 PE=4 SV=1;tr|D2HJ06|D2HJ06_AILME Putative uncharacterized protein OS=Ailuropoda melanoleuca (Giant panda) GN=PANDA_011248 PE=4 SV=1	USP5	9;9;1;1	9;9;1;1	9;9;1;1	4	9	9	9	17.8	96.225	860	860;868;803;859	0	22.615				324	203;1262;2777;3398;3951;3975;4454;5047;7137	True;True;True;True;True;True;True;True;True	216;1344;2962;3620;4212;4238;4761;5420;7750	11777;11778;78965;78966;78967;78968;78969;78970;78971;78972;78973;179249;179250;179251;216684;216685;216686;216687;216688;216689;216690;216691;216692;216693;216694;216695;216696;216697;216698;216699;216700;257468;260489;260490;260491;260492;260493;260494;260495;260496;260497;260498;260499;260500;260501;260502;260503;260504;260505;260506;260507;260508;260509;260510;260511;260512;260513;260514;2962…	20756;20757;135807;135808;135809;135810;135811;135812;135813;135814;135815;329506;329507;329508;395908;395909;395910;395911;395912;395913;395914;395915;395916;395917;395918;395919;395920;395921;395922;395923;395924;469534;475872;475873;475874;475875;475876;475877;475878;475879;475880;475881;475882;475883;475884;475885;475886;475887;475888;475889;475890;475891;475892;475893;475894;475895;475896;47…	20757;135809;329507;395912;469534;475874;539444;632692;886690			P45974	UBP5_HUMAN	Ubiquitin carboxyl-terminal hydrolase 5 OS=Homo sapiens (Human) GN=USP5 PE=1 SV=2	0	0.979	0.992	ok	21164	20351	42550	28791			26781	34014	37615	18420
273	D2HJ86	D2HJ86	D2HJ86	Uncharacterized protein	tr|D2HJ86|D2HJ86_AILME Uncharacterized protein OS=Ailuropoda melanoleuca (Giant panda) GN=THNSL2 PE=4 SV=1	THNSL2	6	6	6	1	6	6	6	18.6	53.428	479	479	0	7.6749				326	848;1265;2692;3960;5460;6030	True;True;True;True;True;True	915;1347;2873;4221;5861;6480	54984;54985;79425;79426;79427;175281;175282;175283;175284;175285;175286;175287;175288;175289;175290;257818;257819;257820;372943;417740;417741;417742	93293;93294;136547;136548;136549;323062;323063;323064;323065;323066;323067;323068;323069;323070;323071;323072;469998;469999;470000;684022;765434;765435;765436	93294;136548;323069;469998;684022;765436			Q86YJ6	THNS2_HUMAN	Threonine synthase-like 2 OS=Homo sapiens (Human) GN=THNSL2 PE=2 SV=3	0	0.871	0.95	ok			22242	22037			17204
274	D2HJ89	D2HJ89;G1LUC4	D2HJ89;G1LUC4	Putative uncharacterized protein	tr|D2HJ89|D2HJ89_AILME Putative uncharacterized protein OS=Ailuropoda melanoleuca (Giant panda) GN=PANDA_011352 PE=3 SV=1;tr|G1LUC4|G1LUC4_AILME Uncharacterized protein OS=Ailuropoda melanoleuca (Giant panda) GN=RPIA PE=3 SV=1	---	3;3	3;3	3;3	2	3	3	3	16.1	32.522	304	304;308	0.007874	3.829				327	2603;3674;6585	True;True;True	2779;3911;7165	170525;238698;457498;457499;457500;457501;457502;457503;457504;457505;457506	314946;436863;840367;840368;840369;840370;840371;840372;840373;840374;840375	314946;436863;840371			P49247	RPIA_HUMAN	Ribose-5-phosphate isomerase OS=Homo sapiens (Human) GN=RPIA PE=1 SV=3	7.1e-100	0.935	0.961	ok					24738					28739
275	D2HJA7	D2HJA7;G1LEE6	D2HJA7;G1LEE6	Putative uncharacterized protein	tr|D2HJA7|D2HJA7_AILME Putative uncharacterized protein OS=Ailuropoda melanoleuca (Giant panda) GN=PANDA_011372 PE=3 SV=1;tr|G1LEE6|G1LEE6_AILME Uncharacterized protein OS=Ailuropoda melanoleuca (Giant panda) GN=ACADL PE=3 SV=1	---	6;6	6;6	3;3	2	6	6	3	16.3	45.422	405	405;432	0	14.514				328	261;673;2992;3954;4738;5040	True;True;True;True;True;True	275;726;3190;4215;5077;5413	14378;14379;14380;14381;14382;14383;45517;45518;45519;45520;45521;45522;45523;45524;45525;45526;45527;45528;45529;45530;45531;45532;45533;45534;45535;45536;45537;45538;45539;45540;45541;45542;45543;45544;45545;191332;191333;191334;257480;257481;257482;257483;257484;257485;257486;257487;257488;257489;257490;257491;257492;257493;257494;257495;257496;257497;257498;257499;257500;257501;257502;257503;…	24724;24725;24726;24727;24728;24729;24730;24731;24732;79020;79021;79022;79023;79024;79025;79026;79027;79028;79029;79030;79031;79032;79033;79034;79035;79036;79037;79038;79039;79040;79041;79042;79043;79044;79045;79046;79047;79048;349696;349697;349698;469546;469547;469548;469549;469550;469551;469552;469553;469554;469555;469556;469557;469558;469559;469560;469561;469562;469563;469564;469565;469566;469…	24728;79046;349696;469567;579850;632314			P28330	ACADL_HUMAN	Long-chain specific acyl-CoA dehydrogenase, mitochondrial OS=Homo sapiens (Human) GN=ACADL PE=1 SV=2	4.6e-213	0.877	0.965	ok	55117	87573	89529	104700	46275	60456		49760	38285	40035
276	D2HJE7	D2HJE7	D2HJE7	Uncharacterized protein	tr|D2HJE7|D2HJE7_AILME Uncharacterized protein OS=Ailuropoda melanoleuca (Giant panda) GN=LOC100479177 PE=4 SV=1	LOC100479177	5	5	5	1	5	5	5	32.7	17.382	153	153	0	8.2557				329	2686;4025;5692;6746;9956	True;True;True;True;True	2867;4289;6119;7341;10765	175181;175182;175183;175184;175185;175186;175187;175188;175189;175190;175191;175192;175193;175194;263610;263611;390006;390007;390008;390009;390010;390011;390012;390013;390014;390015;390016;390017;390018;390019;390020;390021;390022;390023;390024;390025;390026;390027;390028;390029;390030;390031;390032;390033;390034;390035;390036;390037;390038;390039;390040;390041;390042;390043;390044;390045;390046;…	322944;322945;322946;322947;322948;322949;322950;322951;322952;322953;322954;322955;322956;322957;480692;480693;714129;714130;714131;714132;714133;714134;714135;714136;714137;714138;714139;714140;714141;714142;714143;714144;714145;714146;714147;714148;714149;714150;714151;714152;714153;714154;714155;714156;714157;714158;714159;714160;714161;714162;714163;714164;714165;714166;714167;714168;714169;…	322947;480692;714142;853643;1250762			Q9NTK5	OLA1_HUMAN	Obg-like ATPase 1 OS=Homo sapiens (Human) GN=OLA1 PE=1 SV=2	8.8e-81	1	1	ok	31155		37068	33801	31333	34021		23270	35931	28721
277	D2HJF5	D2HJF5;G1M2V2	D2HJF5;G1M2V2	Annexin	tr|D2HJF5|D2HJF5_AILME Annexin OS=Ailuropoda melanoleuca (Giant panda) GN=PANDA_011434 PE=3 SV=1;tr|G1M2V2|G1M2V2_AILME Annexin OS=Ailuropoda melanoleuca (Giant panda) GN=ANXA11 PE=3 SV=1	---	9;9	9;9	8;8	2	9	9	8	19.5	51.212	473	473;507	0	32.048				330	346;1131;2668;2846;6689;7145;7541;8263;8422	True;True;True;True;True;True;True;True;True	370;1206;2848;3037;7277;7758;8183;8955;9125	25791;25792;25793;25794;25795;25796;25797;25798;25799;25800;25801;25802;25803;25804;25805;25806;25807;25808;25809;25810;25811;25812;25813;25814;25815;25816;25817;25818;25819;25820;25821;25822;25823;25824;25825;25826;25827;25828;25829;25830;25831;25832;25833;25834;25835;25836;25837;25838;72036;72037;72038;72039;72040;72041;72042;72043;72044;72045;174278;174279;174280;174281;174282;174283;174284;18…	45868;45869;45870;45871;45872;45873;45874;45875;45876;45877;45878;45879;45880;45881;45882;45883;45884;45885;45886;45887;45888;45889;45890;45891;45892;45893;45894;45895;45896;45897;45898;45899;45900;45901;45902;45903;45904;45905;45906;45907;45908;45909;45910;45911;45912;45913;45914;45915;123212;123213;123214;123215;123216;123217;123218;123219;123220;123221;321626;321627;321628;321629;321630;321631…	45874;123213;321632;339078;849154;887222;923121;1006054;1023249			P50995	ANX11_HUMAN	Annexin A11 OS=Homo sapiens (Human) GN=ANXA11 PE=1 SV=1	2.9e-54	0.926	0.975	ok	120170	148200	101540	138500	50211	79656	122720	121350	124870	119950	130540
278	D2HJP4	D2HJP4;G1LZH7;G1LZI3	D2HJP4;G1LZH7;G1LZI3	Putative uncharacterized protein	tr|D2HJP4|D2HJP4_AILME Putative uncharacterized protein OS=Ailuropoda melanoleuca (Giant panda) GN=PANDA_011541 PE=3 SV=1;tr|G1LZH7|G1LZH7_AILME Uncharacterized protein OS=Ailuropoda melanoleuca (Giant panda) GN=LOC100482767 PE=3 SV=1;tr|G1LZI3|G1LZI3_AI	---	42;37;23	32;27;13	18;16;9	3	42	32	18	68.8	32.968	285	285;285;205	0	323.31				331	16;17;18;216;482;1056;1057;1127;1128;1187;1798;3386;3387;3388;4302;4303;4511;4512;4743;4744;4867;4952;4953;5021;5022;5081;5400;5401;5984;5985;6133;6734;7051;7052;7318;7319;7680;7704;8241;10028;10029;10047	True;True;False;True;True;True;True;True;True;True;False;True;True;True;False;False;True;True;True;True;False;False;False;True;True;False;True;True;True;True;True;True;True;True;False;False;True;True;True;True;True;True	17;18;19;229;520;1129;1130;1202;1203;1264;1915;3608;3609;3610;4594;4595;4821;4822;5082;5083;5220;5319;5320;5393;5394;5457;5801;5802;6434;6435;6610;7327;7659;7660;7661;7941;7942;8329;8330;8357;8929;10843;10844;10864	537;538;539;540;541;542;543;544;545;546;547;548;549;550;551;552;553;554;555;556;557;558;559;560;561;562;563;564;565;566;567;568;569;570;571;572;573;574;575;576;577;578;579;580;581;582;583;584;585;586;587;588;589;590;591;592;593;594;595;596;597;598;599;600;601;602;603;604;605;606;607;608;609;610;611;612;613;614;615;616;617;618;619;620;621;622;623;624;625;626;627;628;629;630;631;632;633;634;635;636…					P06753	TPM3_HUMAN	Tropomyosin alpha-3 chain OS=Homo sapiens (Human) GN=TPM3 PE=1 SV=2	3.6e-44	0.996	1	ok	9747100	8973500	13489000	14460000	9896700	12318000	10830000	10968000	8541500	8810100	11075000
279	D2HJV9	D2HJV9	D2HJV9;G1LU82;D2H0T2;D2H1H9	Uncharacterized protein	tr|D2HJV9|D2HJV9_AILME Uncharacterized protein OS=Ailuropoda melanoleuca (Giant panda) GN=LOC100465510 PE=3 SV=1	LOC100465510	5;2;2;2	5;2;2;2	5;2;2;2	4	5	5	5	20.4	34.834	318	318;279;284;318	0	12.305				332	3953;5604;6348;9455;9636	True;True;True;True;True	4214;6026;6904;10225;10425	257475;257476;257477;257478;257479;384367;384368;384369;384370;384371;384372;384373;384374;384375;441497;657462;657463;657464;657465;657466;657467;657468;657469;657470;657471;670798;670799;670800;670801;670802	469541;469542;469543;469544;469545;703589;703590;703591;703592;703593;703594;703595;703596;703597;809058;1193029;1193030;1193031;1193032;1193033;1193034;1193035;1193036;1193037;1193038;1215862;1215863;1215864;1215865;1215866	469541;703594;809058;1193038;1215862			P60891	PRPS1_HUMAN	Ribose-phosphate pyrophosphokinase 1 OS=Homo sapiens (Human) GN=PRPS1 PE=1 SV=2	1.2e-216	1	1	ok			34843	33613	43332				37760	33208
280	D2HJY8	D2HJY8;G1LJG4	D2HJY8;G1LJG4	Putative uncharacterized protein	tr|D2HJY8|D2HJY8_AILME Putative uncharacterized protein OS=Ailuropoda melanoleuca (Giant panda) GN=PANDA_011655 PE=4 SV=1;tr|G1LJG4|G1LJG4_AILME Uncharacterized protein OS=Ailuropoda melanoleuca (Giant panda) GN=USP14 PE=4 SV=1	---	3;3	3;3	3;3	2	3	3	3	8.1	55.677	491	491;494	0	21.106				333	666;2483;5615	True;True;True	719;2650;6037	45268;45269;45270;45271;45272;45273;45274;45275;45276;45277;45278;45279;45280;45281;45282;45283;45284;45285;45286;45287;45288;45289;45290;45291;45292;45293;45294;45295;45296;45297;45298;45299;45300;45301;45302;45303;45304;160437;160438;385083	78611;78612;78613;78614;78615;78616;78617;78618;78619;78620;78621;78622;78623;78624;78625;78626;78627;78628;78629;78630;78631;78632;78633;78634;78635;78636;78637;78638;78639;78640;78641;78642;78643;78644;78645;78646;78647;294540;294541;704962	78639;294541;704962			P54578	UBP14_HUMAN	Ubiquitin carboxyl-terminal hydrolase 14 OS=Homo sapiens (Human) GN=USP14 PE=1 SV=3	0	0.99	1	OK	30499		29210		25515	29018	29145	31756
281	D2HK38	D2HK38;G1M782	D2HK38;G1M782	Putative uncharacterized protein	tr|D2HK38|D2HK38_AILME Putative uncharacterized protein OS=Ailuropoda melanoleuca (Giant panda) GN=PANDA_011719 PE=3 SV=1;tr|G1M782|G1M782_AILME Uncharacterized protein OS=Ailuropoda melanoleuca (Giant panda) GN=ALDH1A3 PE=3 SV=1	---	3;3	2;2	2;2	2	3	2	2	3.9	50.118	456	456;498	0	7.3469				334	4125;4126;9502	True;True;False	4396;4397;10274	273624;273625;273626;273627;273628;273629;273630;273631;273632;273633;273634;273635;273636;273637;273638;273639;273640;273641;273642;273643;273644;273645;273646;273647;273648;273649;273650;273651;273652;273653;273654;273655;273656;273657;273658;273659;273660;273661;273662;273663;273664;273665;273666;273667;273668;273669;273670;273671;273672;273673;273674;273675;273676;273677;273678;273679;273680;…	498804;498805;498806;498807;498808;498809;498810;498811;498812;498813;498814;498815;498816;498817;498818;498819;498820;498821;498822;498823;498824;498825;498826;498827;498828;498829;498830;498831;498832;498833;498834;498835;498836;498837;498838;498839;498840;498841;498842;498843;498844;498845;498846;498847;498848;498849;498850;498851;498852;498853;498854;498855;498856;498857;498858;498859;498860;…	498815;498859;1196738			P47895	AL1A3_HUMAN	Aldehyde dehydrogenase family 1 member A3 OS=Homo sapiens (Human) GN=ALDH1A3 PE=1 SV=2	0	0.943	0.987	ok	50388	48991	44876	30090	71713	55329	51082		37684	54401	64089
282	D2HK63	D2HK63;G1M7H1	D2HK63;G1M7H1	Putative uncharacterized protein	tr|D2HK63|D2HK63_AILME Putative uncharacterized protein OS=Ailuropoda melanoleuca (Giant panda) GN=PANDA_011751 PE=4 SV=1;tr|G1M7H1|G1M7H1_AILME Uncharacterized protein OS=Ailuropoda melanoleuca (Giant panda) GN=SMTNL1 PE=4 SV=1	---	9;9	9;9	9;9	2	9	9	9	23.9	47.445	447	447;452	0	80.968				335	36;1083;1705;2528;2549;3659;4888;4965;6561	True;True;True;True;True;True;True;True;True	38;1156;1815;2700;2722;3895;5244;5335;7135	1739;1740;1741;69369;69370;69371;69372;69373;69374;69375;69376;69377;69378;69379;112898;112899;112900;112901;112902;112903;112904;112905;112906;112907;112908;112909;112910;112911;112912;112913;112914;112915;112916;112917;112918;112919;112920;112921;112922;112923;112924;112925;112926;112927;112928;112929;112930;112931;112932;112933;112934;112935;112936;112937;112938;112939;112940;112941;112942;112…	2622;2623;2624;119570;119571;119572;119573;119574;119575;119576;119577;119578;119579;119580;207354;207355;207356;207357;207358;207359;207360;207361;207362;207363;207364;207365;207366;207367;207368;207369;207370;207371;207372;207373;207374;207375;207376;207377;207378;207379;207380;207381;207382;207383;207384;207385;207386;207387;207388;207389;207390;207391;207392;207393;207394;207395;207396;207397…	2623;119571;207408;307535;309800;436391;594309;606894;837596			A8MU46	SMTL1_HUMAN	Smoothelin-like protein 1 OS=Homo sapiens (Human) GN=SMTNL1 PE=1 SV=1	4.4e-44	0.708	0.817	not checked	26188	50923	78389	67461	104620	92242	76238	92394	59853	49613
[truncated: 443 more rows]
[truncated: 71 more columns]

## Sheet: Quantification
Metabolic reprogramming involving glycolysis in the hibernating brown bear skeletal muscle
Blandine Chazarin1,10, Kenneth B. Storey2, Anna Ziemianin1,10, Stéphanie Chanon3, Marine Plumel1, Isabelle Chery1, Christine Durand3, Alina Evans4, Jon M. Arnemo4,5, Andreas Zedrosser6,7, Jon E. Swenson8,9, Guillemette Gauquelin-Koch10, Chantal Simon3, Stephane Blanc1, Etienne Lefai3,11, and Fabrice Bertile1,*
1 Université de Strasbourg, CNRS, IPHC UMR 7178, Strasbourg F-670000, France 2 Department of Biology, Carleton University, Ottawa ON K1S 5B6, Canada. 3 CarMen Laboratory, INSERM 1060, INRA 1397, University of Lyon, Oullins F-69600, France 4 Department of Forestry and Wildlife Management, Inland Norway University of Applied Sciences, Campus Evenstad, Koppang NO-2480, Norway 5 Department of Wildlif…
[truncated: 544 more rows]
[truncated: 50 more columns]
