# Supplementary material for: Metabolic reprogramming involving glycolysis in the hibernating brown bear skeletal muscle
Source: Front Zool. 2019 May 6;16:12. doi: 10.1186/s12983-019-0312-2 (PMC6503430; doi:10.1186/s12983-019-0312-2)
Supplement: Supplementary file 2 — Table S2. List of vastus lateralis proteins identified in 2D gel spots, and exhibiting a differential abundance between hibernating (winter) and active (summer) brown bears (Ursus arctos). (XLSX 53 kb) [file 12983_2019_312_MOESM2_ESM.xlsx]

## Sheet: Identification & quantification
Metabolic reprogramming involving glycolysis in the hibernating brown bear skeletal muscle
Blandine Chazarin1,10, Kenneth B. Storey2, Anna Ziemianin1,10, Stéphanie Chanon3, Marine Plumel1, Isabelle Chery1, Christine Durand3, Alina Evans4, Jon M. Arnemo4,5, Andreas Zedrosser6,7, Jon E. Swenson8,9, Guillemette Gauquelin-Koch10, Chantal Simon3, Stephane Blanc1, Etienne Lefai3,11, and Fabrice Bertile1,*
1 Université de Strasbourg, CNRS, IPHC UMR 7178, Strasbourg F-670000, France 2 Department of Biology, Carleton University, Ottawa ON K1S 5B6, Canada. 3 CarMen Laboratory, INSERM 1060, INRA 1397, University of Lyon, Oullins F-69600, France 4 Department of Forestry and Wildlife Management, Inland Norway University of Applied Sciences, Campus Evenstad, Koppang NO-2480, Norway 5 Department of Wildlif…
* Correspondence: fbertile@unistra.fr (F. Bertile)
Supplementary Table S2. List of vastus lateralis proteins identified in 2D gel spots, and exhibiting a differential abundance between hibernating (winter) and active (summer) brown bears (Ursus arctos).
	Protein identification using Mascot search engine and Proline software #NOTE: Major proteins (i.e. more abundant and supposedly responsible for protein spot intensities) in given spots are highlighted in yellow in the column "Gene Name (Leading)". #NOTE: *(in the Gene Name column) indicate proteins that were quantified also using label-free (XIC) MS1-based analyses, and that exhibited very simila…														Retrieving of human homologues identifiers using Fasta program (v36; http://fasta.bioch.virginia.edu/fasta_www2/fasta_down.shtml; UniprotKb human database, TaxId 9606)						Quantification with Samespot (Normalized volume vs CY2 signals) in active bears (Summer)											Quantification with Samespot (Normalized volume vs CY2 signals) in hibernating bears (Winter)											Statistics					Proteins in Figure 2
																					Bear Id: W1204	Bear Id: W1209	Bear Id: W1110	Bear Id: W1202	Bear Id: W1207	Bear Id: W1105	Bear Id: W1104	Protein abundance (Summer)				Bear Id: W1204	Bear Id: W1209	Bear Id: W1110	Bear Id: W1202	Bear Id: W1207	Bear Id: W1105	Bear Id: W1104	Protein abundance (Winter)				Checking for the Normal distribution of values	Checking for the homoscedasticity of values	Welch Student t-tests	Paired t-tests	Ratio Winter vs Summer
# spot	Leading protein	Uniprot ACC (Leading)	Fasta header (Leading)	Description (Leading)	Gene Name (Leading)	Taxonomy	Uniprot ID (Sameset)	Protein_set_score	all peptides (without PTM)	all peptides (with PTM)	specific peptides	coverage (%)	Protein Molecular Weight (Da) (Leading)	Protein pI (Leading)	hsa name	hsa accession ID	Score	Identity	Similary	Description	Normalized volume (CY3) 1	Normalized volume (CY5) 2	Normalized volume (CY3) 3	Normalized volume (CY5) 4	Normalized volume (CY3) 5	Normalized volume (CY5) 6	Normalized volume (CY3) 7	Median (Summer)	Mean (Summer)	SD (Summer)	CV (%) (Summer)	Normalized volume (CY5) 1	Normalized volume (CY3) 2	Normalized volume (CY5) 3	Normalized volume (CY3) 4	Normalized volume (CY5) 5	Normalized volume (CY3) 6	Normalized volume (CY5) 7	Median (Winter)	Mean (Winter)	SD (Winter)	CV (%) (Winter)	Shapiro p-values	Bartlett p-values	T-test (Welsh) p-values	paired t-tests p-values	Ratio	Figure 2
269	D2HKX8_AILME	D2HKX8	tr|D2HKX8|D2HKX8_AILME	D2HKX8_AILME Putative uncharacterized protein OS=Ailuropoda melanoleuca (Giant panda) GN=PANDA_012085 PE=4 SV=1	PANDA_012085	9646	tr|D2HKX8|D2HKX8_AILME; tr|G1LPW7|G1LPW7_AILME	35,448	3	3	3	26,27	13442	5.17	COX5A_HUMAN	P20674	7.2e-61	0.949	0.992	Cytochrome c oxidase subunit 5A, mitochondrial OS=Homo sapiens (Human) GN=COX5A PE=1 SV=2	0.773549	2.18057	1.07721	1.73531	1.1523	1.00647	1.6606	1.1523	1.36943	0.499324	36.4622	0.279648	0.474911	0.816392	0.722694	0.626583	0.887608	0.630246	0.630246	0.634012	0.206718	32.6048	0.192013	0.0499517	0.00698116	0.0122223	0.696381	COX5A
281	D2HNI5_AILME	D2HNI5	tr|D2HNI5|D2HNI5_AILME	D2HNI5_AILME Putative uncharacterized protein OS=Ailuropoda melanoleuca (Giant panda) GN=PANDA_013258 PE=3 SV=1	PANDA_013258	9646	tr|D2HNI5|D2HNI5_AILME	288,301	10	11	1	62,07	12956	6.08	FABPH_HUMAN	P05413	5.9e-54	0.888	0.966	Fatty acid-binding protein, heart OS=Homo sapiens (Human) GN=FABP3 PE=1 SV=4	0.602545	0.998426	0.8319	0.652668	0.987475	1.0449	1.07687	0.987475	0.884968	0.192495	21.7516	0.833238	1.44187	1.04978	1.2573	1.24111	1.06527	1.64444	1.24111	1.219	0.268857	22.0555	0.748268	0.435887	0.0218866	0.00584061	1.19221	FABP3
281	G1MH78_AILME	G1MH78	tr|G1MH78|G1MH78_AILME	G1MH78_AILME Uncharacterized protein OS=Ailuropoda melanoleuca (Giant panda) GN=FABP3 PE=3 SV=1	FABP3	9646	tr|G1MH78|G1MH78_AILME	266,266	10	11	1	57,04	15019	6.34	FABPH_HUMAN	P05413	5.3e-65	0.895	0.97	Fatty acid-binding protein, heart OS=Homo sapiens (Human) GN=FABP3 PE=1 SV=4	0.602545	0.998426	0.8319	0.652668	0.987475	1.0449	1.07687	0.987475	0.884968	0.192495	21.7516	0.833238	1.44187	1.04978	1.2573	1.24111	1.06527	1.64444	1.24111	1.219	0.268857	22.0555	0.748268	0.435887	0.0218866	0.00584061	1.19221	FABP3
343	D2HD33_AILME	D2HD33	tr|D2HD33|D2HD33_AILME	D2HD33_AILME Uncharacterized protein OS=Ailuropoda melanoleuca (Giant panda) GN=ATP5H PE=4 SV=1	ATP5H*	9646	tr|D2HD33|D2HD33_AILME	79,759	4	4	4	22,36	18633	5.64	ATP5H_HUMAN	O75947	1e-66	0.882	0.981	ATP synthase subunit d, mitochondrial OS=Homo sapiens (Human) GN=ATP5H PE=1 SV=3	1.15967	1.11022	1.46592	1.103	1.59612	2.08475	1.60619	1.46592	1.44655	0.357997	24.7483	0.782519	0.728587	0.937375	0.782968	1.01034	1.07193	1.22371	0.937375	0.933918	0.181083	19.3896	0.186536	0.121703	0.00827348	0.00131492	0.693255	ATP5H
399	D2H5H7_AILME	D2H5H7	tr|D2H5H7|D2H5H7_AILME	D2H5H7_AILME Putative uncharacterized protein OS=Ailuropoda melanoleuca (Giant panda) GN=PANDA_005152 PE=4 SV=1	PANDA_005152	9646	tr|D2H5H7|D2H5H7_AILME	202,057	9	9	9	37,05	24927	5.72	PRDX6_HUMAN	P30041	7.4e-113	0.942	0.982	Peroxiredoxin-6 OS=Homo sapiens (Human) GN=PRDX6 PE=1 SV=3	0.764968	0.636261	0.733838	0.841161	0.727647	0.914283	0.90834	0.764968	0.7895	0.102771	13.0172	1.04351	0.808035	1.32837	1.28036	1.65912	1.16794	1.03907	1.16794	1.18949	0.270186	22.7145	0.206629	0.0333852	0.00682801	0.00972014	1.32223
420	G1LRC6_AILME	G1LRC6	tr|G1LRC6|G1LRC6_AILME	G1LRC6_AILME Uncharacterized protein OS=Ailuropoda melanoleuca (Giant panda) GN=ACTA1 PE=3 SV=1	ACTA1	9646	tr|G1LRC6|G1LRC6_AILME	404,919	11	11	11	33,42	42020	5.48	ACTS_HUMAN	P68133	4.7e-135	0.932	0.942	Actin, alpha skeletal muscle OS=Homo sapiens (Human) GN=ACTA1 PE=1 SV=1	1.29289	1.72925	1.23861	0.960599	1.05669	0.968477	1.19431	1.19431	1.20583	0.265037	21.9796	0.970477	0.761065	1.02852	0.690739	0.965412	1.09142	0.821625	0.965412	0.90418	0.148053	16.3743	0.15009	0.182086	0.0264386	0.0559526	0.853286
454	D2HHZ6_AILME	D2HHZ6	tr|D2HHZ6|D2HHZ6_AILME	D2HHZ6_AILME Malate dehydrogenase OS=Ailuropoda melanoleuca (Giant panda) GN=PANDA_010775 PE=3 SV=1	PANDA_010775*	9646	tr|D2HHZ6|D2HHZ6_AILME; tr|G1LFQ4|G1LFQ4_AILME	212,658	10	11	11	27,54	36383	6.52	MDHC_HUMAN	P40925	1.9e-209	0.955	0.994	Malate dehydrogenase, cytoplasmic OS=Homo sapiens (Human) GN=MDH1 PE=1 SV=4	0.717274	0.662057	1.01017	0.836448	0.938276	1.27225	0.930039	0.930039	0.909502	0.202685	22.2853	0.922582	1.37556	1.10935	1.16462	1.10897	1.04658	1.3971	1.10935	1.16068	0.171805	14.8021	0.879761	0.697928	0.0283238	0.0658125	1.13234	MDH1
524	D2HAK6_AILME	D2HAK6	tr|D2HAK6|D2HAK6_AILME	D2HAK6_AILME Putative uncharacterized protein OS=Ailuropoda melanoleuca (Giant panda) GN=PANDA_007475 PE=3 SV=1	PANDA_007475	9646	tr|D2HAK6|D2HAK6_AILME	466,889	18	18	9	52,53	29752	4.69	TPM2_HUMAN	P07951	3.8e-42	0.996	1	Tropomyosin beta chain OS=Homo sapiens (Human) GN=TPM2 PE=1 SV=1	0.907952	0.757882	0.786887	1.17864	0.888244	1.08346	0.88151	0.888244	0.926368	0.152734	16.4874	1.17946	1.13811	1.10914	0.942113	1.08585	1.04132	1.20127	1.10914	1.09961	0.088201	8.02111	0.209569	0.207032	0.0273793	0.0907696	1.16546
524	D2I3N9_AILME	D2I3N9	tr|D2I3N9|D2I3N9_AILME	D2I3N9_AILME Uncharacterized protein OS=Ailuropoda melanoleuca (Giant panda) GN=TPM1 PE=3 SV=1	TPM1	9646	tr|D2I3N9|D2I3N9_AILME	280,954	11	11	0	26,38	37441	4.67	TPM1_HUMAN	P09493	5.2e-36	0.794	0.844	Tropomyosin alpha-1 chain OS=Homo sapiens (Human) GN=TPM1 PE=1 SV=2	0.907952	0.757882	0.786887	1.17864	0.888244	1.08346	0.88151	0.888244	0.926368	0.152734	16.4874	1.17946	1.13811	1.10914	0.942113	1.08585	1.04132	1.20127	1.10914	1.09961	0.088201	8.02111	0.209569	0.207032	0.0273793	0.0907696	1.16546
524	D2GUY3_AILME	D2GUY3	tr|D2GUY3|D2GUY3_AILME	D2GUY3_AILME Uncharacterized protein OS=Ailuropoda melanoleuca (Giant panda) GN=TPM4 PE=3 SV=1	TPM4	9646	tr|D2GUY3|D2GUY3_AILME; tr|G1LTE9|G1LTE9_AILME	162,409	7	7	1	22,18	32770	4.71	TPM3_HUMAN	P06753	3.5e-37	0.806	0.947	Tropomyosin alpha-3 chain OS=Homo sapiens (Human) GN=TPM3 PE=1 SV=2	0.907952	0.757882	0.786887	1.17864	0.888244	1.08346	0.88151	0.888244	0.926368	0.152734	16.4874	1.17946	1.13811	1.10914	0.942113	1.08585	1.04132	1.20127	1.10914	1.09961	0.088201	8.02111	0.209569	0.207032	0.0273793	0.0907696	1.16546
524	D2HJP4_AILME	D2HJP4	tr|D2HJP4|D2HJP4_AILME	D2HJP4_AILME Putative uncharacterized protein OS=Ailuropoda melanoleuca (Giant panda) GN=PANDA_011541 PE=3 SV=1	PANDA_011541	9646	tr|D2HJP4|D2HJP4_AILME	113,76	6	6	1	21,05	32968	4.68	TPM3_HUMAN	P06753	3.6e-44	0.996	1	Tropomyosin alpha-3 chain OS=Homo sapiens (Human) GN=TPM3 PE=1 SV=2	0.907952	0.757882	0.786887	1.17864	0.888244	1.08346	0.88151	0.888244	0.926368	0.152734	16.4874	1.17946	1.13811	1.10914	0.942113	1.08585	1.04132	1.20127	1.10914	1.09961	0.088201	8.02111	0.209569	0.207032	0.0273793	0.0907696	1.16546
562	D2H7R6_AILME	D2H7R6	tr|D2H7R6|D2H7R6_AILME	D2H7R6_AILME Uncharacterized protein OS=Ailuropoda melanoleuca (Giant panda) GN=ACTC1 PE=3 SV=1	ACTC1	9646	tr|D2H7R6|D2H7R6_AILME	1366,389	22	29	6	62,33	42019	5.23	ACTC_HUMAN	P68032	1.9e-200	1	1	Actin, alpha cardiac muscle 1 OS=Homo sapiens (Human) GN=ACTC1 PE=1 SV=1	0.705667	0.671747	0.896143	0.772049	0.903604	1.13021	0.77128	0.772049	0.835815	0.156521	18.7268	1.01199	1.09089	1.00406	0.888991	1.02695	0.915113	1.20797	1.01199	1.02085	0.107147	10.4958	0.862451	0.378009	0.0262115	0.0737625	1.18094
562	G1LRC6_AILME	G1LRC6	tr|G1LRC6|G1LRC6_AILME	G1LRC6_AILME Uncharacterized protein OS=Ailuropoda melanoleuca (Giant panda) GN=ACTA1 PE=3 SV=1	ACTA1	9646	tr|G1LRC6|G1LRC6_AILME	1287,896	21	29	6	53,74	42020	5.48	ACTS_HUMAN	P68133	4.7e-135	0.932	0.942	Actin, alpha skeletal muscle OS=Homo sapiens (Human) GN=ACTA1 PE=1 SV=1	0.705667	0.671747	0.896143	0.772049	0.903604	1.13021	0.77128	0.772049	0.835815	0.156521	18.7268	1.01199	1.09089	1.00406	0.888991	1.02695	0.915113	1.20797	1.01199	1.02085	0.107147	10.4958	0.862451	0.378009	0.0262115	0.0737625	1.18094
563	D2HPA6_AILME	D2HPA6	tr|D2HPA6|D2HPA6_AILME	D2HPA6_AILME Uncharacterized protein OS=Ailuropoda melanoleuca (Giant panda) GN=CKM PE=3 SV=1	CKM*	9646	tr|D2HPA6|D2HPA6_AILME	958,272	21	24	9	61,15	43152	6.77	KCRM_HUMAN	P06732	3.9e-219	0.971	0.995	Creatine kinase M-type OS=Homo sapiens (Human) GN=CKM PE=1 SV=2	0.572739	0.83105	0.758231	0.897966	0.759713	1.14449	0.674777	0.759713	0.805567	0.182445	22.648	1.0974	1.17958	1.17587	1.00182	0.970053	0.77277	1.16432	1.0974	1.05169	0.149164	14.1833	0.226089	0.636653	0.0177266	0.0811036	1.26373	CKM
563	D2HX47_AILME	D2HX47	tr|D2HX47|D2HX47_AILME	D2HX47_AILME Fructose-bisphosphate aldolase OS=Ailuropoda melanoleuca (Giant panda) GN=PANDA_017154 PE=3 SV=1	PANDA_017154*	9646	tr|D2HX47|D2HX47_AILME; tr|G1M9L3|G1M9L3_AILME	444,872	13	13	13	39,9	45183	7.98	ALDOA_HUMAN	P04075	9.7e-208	0.989	1	Fructose-bisphosphate aldolase A OS=Homo sapiens (Human) GN=ALDOA PE=1 SV=2	0.572739	0.83105	0.758231	0.897966	0.759713	1.14449	0.674777	0.759713	0.805567	0.182445	22.648	1.0974	1.17958	1.17587	1.00182	0.970053	0.77277	1.16432	1.0974	1.05169	0.149164	14.1833	0.226089	0.636653	0.0177266	0.0811036	1.26373	ALDOA
563	D2I671_AILME	D2I671	tr|D2I671|D2I671_AILME	D2I671_AILME Aspartate aminotransferase OS=Ailuropoda melanoleuca (Giant panda) GN=GOT1 PE=3 SV=1	GOT1	9646	tr|D2I671|D2I671_AILME	236,015	7	7	7	22,28	46307	7.09	AATC_HUMAN	P17174	0	0.935	0.983	Aspartate aminotransferase, cytoplasmic OS=Homo sapiens (Human) GN=GOT1 PE=1 SV=3	0.572739	0.83105	0.758231	0.897966	0.759713	1.14449	0.674777	0.759713	0.805567	0.182445	22.648	1.0974	1.17958	1.17587	1.00182	0.970053	0.77277	1.16432	1.0974	1.05169	0.149164	14.1833	0.226089	0.636653	0.0177266	0.0811036	1.26373
563	D2HM24_AILME	D2HM24	tr|D2HM24|D2HM24_AILME	D2HM24_AILME Uncharacterized protein OS=Ailuropoda melanoleuca (Giant panda) GN=PDLIM3 PE=4 SV=1	PDLIM3	9646	tr|D2HM24|D2HM24_AILME	224,201	6	6	6	26,92	39301	6.79	PDLI3_HUMAN	Q53GG5	5.2e-126	0.937	0.989	PDZ and LIM domain protein 3 OS=Homo sapiens (Human) GN=PDLIM3 PE=1 SV=1	0.572739	0.83105	0.758231	0.897966	0.759713	1.14449	0.674777	0.759713	0.805567	0.182445	22.648	1.0974	1.17958	1.17587	1.00182	0.970053	0.77277	1.16432	1.0974	1.05169	0.149164	14.1833	0.226089	0.636653	0.0177266	0.0811036	1.26373
563	D2HXY9_AILME	D2HXY9	tr|D2HXY9|D2HXY9_AILME	D2HXY9_AILME Phosphoglycerate kinase OS=Ailuropoda melanoleuca (Giant panda) GN=PANDA_017537 PE=3 SV=1	PANDA_017537	9646	tr|D2HXY9|D2HXY9_AILME; tr|G1MGY6|G1MGY6_AILME	62,187	2	2	2	5,8	40192	6.31	PGK1_HUMAN	P00558	1.6e-212	0.966	0.995	Phosphoglycerate kinase 1 OS=Homo sapiens (Human) GN=PGK1 PE=1 SV=3	0.572739	0.83105	0.758231	0.897966	0.759713	1.14449	0.674777	0.759713	0.805567	0.182445	22.648	1.0974	1.17958	1.17587	1.00182	0.970053	0.77277	1.16432	1.0974	1.05169	0.149164	14.1833	0.226089	0.636653	0.0177266	0.0811036	1.26373
568	G1LRC6_AILME	G1LRC6	tr|G1LRC6|G1LRC6_AILME	G1LRC6_AILME Uncharacterized protein OS=Ailuropoda melanoleuca (Giant panda) GN=ACTA1 PE=3 SV=1	ACTA1	9646	tr|G1LRC6|G1LRC6_AILME	1410,51	20	32	6	47,06	42020	5.48	ACTS_HUMAN	P68133	4.7e-135	0.932	0.942	Actin, alpha skeletal muscle OS=Homo sapiens (Human) GN=ACTA1 PE=1 SV=1	0.636171	0.819971	0.731765	0.632312	0.805649	0.958589	0.767841	0.767841	0.764614	0.113626	14.8606	1.11223	0.950721	1.02846	0.736121	1.02221	0.971944	1.10359	1.02221	0.989324	0.126938	12.8307	0.305044	0.79452	0.00454302	0.00924119	1.19281
568	D2H7R6_AILME	D2H7R6	tr|D2H7R6|D2H7R6_AILME	D2H7R6_AILME Uncharacterized protein OS=Ailuropoda melanoleuca (Giant panda) GN=ACTC1 PE=3 SV=1	ACTC1	9646	tr|D2H7R6|D2H7R6_AILME	1258,869	20	30	4	54,91	42019	5.23	ACTC_HUMAN	P68032	1.9e-200	1	1	Actin, alpha cardiac muscle 1 OS=Homo sapiens (Human) GN=ACTC1 PE=1 SV=1	0.636171	0.819971	0.731765	0.632312	0.805649	0.958589	0.767841	0.767841	0.764614	0.113626	14.8606	1.11223	0.950721	1.02846	0.736121	1.02221	0.971944	1.10359	1.02221	0.989324	0.126938	12.8307	0.305044	0.79452	0.00454302	0.00924119	1.19281
568	D2H496_AILME	D2H496	tr|D2H496|D2H496_AILME	D2H496_AILME Uncharacterized protein OS=Ailuropoda melanoleuca (Giant panda) GN=LOC100481739 PE=3 SV=1	LOC100481739	9646	tr|D2H496|D2H496_AILME; tr|D2I7P0|D2I7P0_AILME	807,144	14	22	1	31,47	41747	5.29	ACTB_HUMAN	P60709	3e-189	0.997	0.997	Actin, cytoplasmic 1 OS=Homo sapiens (Human) GN=ACTB PE=1 SV=1	0.636171	0.819971	0.731765	0.632312	0.805649	0.958589	0.767841	0.767841	0.764614	0.113626	14.8606	1.11223	0.950721	1.02846	0.736121	1.02221	0.971944	1.10359	1.02221	0.989324	0.126938	12.8307	0.305044	0.79452	0.00454302	0.00924119	1.19281
569	D2HPA6_AILME	D2HPA6	tr|D2HPA6|D2HPA6_AILME	D2HPA6_AILME Uncharacterized protein OS=Ailuropoda melanoleuca (Giant panda) GN=CKM PE=3 SV=1	CKM*	9646	tr|D2HPA6|D2HPA6_AILME	728,733	20	21	9	47,77	43152	6.77	KCRM_HUMAN	P06732	3.9e-219	0.971	0.995	Creatine kinase M-type OS=Homo sapiens (Human) GN=CKM PE=1 SV=2	0.559808	0.842393	0.713603	0.788899	0.772108	1.06183	0.690527	0.772108	0.775596	0.155042	19.99	1.17525	1.2039	1.24654	0.996743	1.0388	0.908751	1.17111	1.17111	1.10587	0.124987	11.3022	0.534931	0.613439	0.000980315	0.0146732	1.31859	CKM
569	D2HX47_AILME	D2HX47	tr|D2HX47|D2HX47_AILME	D2HX47_AILME Fructose-bisphosphate aldolase OS=Ailuropoda melanoleuca (Giant panda) GN=PANDA_017154 PE=3 SV=1	ALDOA*	9646	sp|P00883|ALDOA_RABIT; tr|D2HX47|D2HX47_AILME; tr|G1M9L3|G1M9L3_AILME	404,477	13	15	13	33,79	39343	7.98	ALDOA_HUMAN	P04075	9.7e-208	0.989	1	Fructose-bisphosphate aldolase A OS=Homo sapiens (Human) GN=ALDOA PE=1 SV=2	0.559808	0.842393	0.713603	0.788899	0.772108	1.06183	0.690527	0.772108	0.775596	0.155042	19.99	1.17525	1.2039	1.24654	0.996743	1.0388	0.908751	1.17111	1.17111	1.10587	0.124987	11.3022	0.534931	0.613439	0.000980315	0.0146732	1.31859	ALDOA
569	D2I671_AILME	D2I671	tr|D2I671|D2I671_AILME	D2I671_AILME Aspartate aminotransferase OS=Ailuropoda melanoleuca (Giant panda) GN=GOT1 PE=3 SV=1	GOT1*	9646	tr|D2I671|D2I671_AILME	395,081	15	15	15	37,29	46307	7.09	AATC_HUMAN	P17174	0	0.935	0.983	Aspartate aminotransferase, cytoplasmic OS=Homo sapiens (Human) GN=GOT1 PE=1 SV=3	0.559808	0.842393	0.713603	0.788899	0.772108	1.06183	0.690527	0.772108	0.775596	0.155042	19.99	1.17525	1.2039	1.24654	0.996743	1.0388	0.908751	1.17111	1.17111	1.10587	0.124987	11.3022	0.534931	0.613439	0.000980315	0.0146732	1.31859	GOT1
569	D2GZ42_AILME	D2GZ42	tr|D2GZ42|D2GZ42_AILME	D2GZ42_AILME Uncharacterized protein OS=Ailuropoda melanoleuca (Giant panda) GN=ACTA2 PE=3 SV=1	ACTA2	9646	tr|D2GZ42|D2GZ42_AILME; tr|D2H7R6|D2H7R6_AILME; tr|G1LRC6|G1LRC6_AILME	239,518	8	8	8	25,73	42009	5.24	ACTA_HUMAN	P62736	5.9e-191	1	1	Actin, aortic smooth muscle OS=Homo sapiens (Human) GN=ACTA2 PE=1 SV=1	0.559808	0.842393	0.713603	0.788899	0.772108	1.06183	0.690527	0.772108	0.775596	0.155042	19.99	1.17525	1.2039	1.24654	0.996743	1.0388	0.908751	1.17111	1.17111	1.10587	0.124987	11.3022	0.534931	0.613439	0.000980315	0.0146732	1.31859
569	D2HM24_AILME	D2HM24	tr|D2HM24|D2HM24_AILME	D2HM24_AILME Uncharacterized protein OS=Ailuropoda melanoleuca (Giant panda) GN=PDLIM3 PE=4 SV=1	PDLIM3	9646	tr|D2HM24|D2HM24_AILME	208,878	7	7	7	27,47	39301	6.79	PDLI3_HUMAN	Q53GG5	5.2e-126	0.937	0.989	PDZ and LIM domain protein 3 OS=Homo sapiens (Human) GN=PDLIM3 PE=1 SV=1	0.559808	0.842393	0.713603	0.788899	0.772108	1.06183	0.690527	0.772108	0.775596	0.155042	19.99	1.17525	1.2039	1.24654	0.996743	1.0388	0.908751	1.17111	1.17111	1.10587	0.124987	11.3022	0.534931	0.613439	0.000980315	0.0146732	1.31859
569	G1MGY6_AILME	G1MGY6	tr|G1MGY6|G1MGY6_AILME	G1MGY6_AILME Phosphoglycerate kinase OS=Ailuropoda melanoleuca (Giant panda) GN=PGK1 PE=3 SV=1	PGK1	9646	tr|G1MGY6|G1MGY6_AILME	208,708	7	7	7	19,66	44564	7.99	PGK1_HUMAN	P00558	0	0.969	0.995	Phosphoglycerate kinase 1 OS=Homo sapiens (Human) GN=PGK1 PE=1 SV=3	0.559808	0.842393	0.713603	0.788899	0.772108	1.06183	0.690527	0.772108	0.775596	0.155042	19.99	1.17525	1.2039	1.24654	0.996743	1.0388	0.908751	1.17111	1.17111	1.10587	0.124987	11.3022	0.534931	0.613439	0.000980315	0.0146732	1.31859
569	G1LA41_AILME	G1LA41	tr|G1LA41|G1LA41_AILME	G1LA41_AILME Uncharacterized protein OS=Ailuropoda melanoleuca (Giant panda) GN=ACADM PE=3 SV=1	ACADM	9646	tr|G1LA41|G1LA41_AILME	103,956	3	3	3	9,5	46793	8.55	ACADM_HUMAN	P11310	2.7e-167	0.9	0.969	Medium-chain specific acyl-CoA dehydrogenase, mitochondrial OS=Homo sapiens (Human) GN=ACADM PE=1 SV=1	0.559808	0.842393	0.713603	0.788899	0.772108	1.06183	0.690527	0.772108	0.775596	0.155042	19.99	1.17525	1.2039	1.24654	0.996743	1.0388	0.908751	1.17111	1.17111	1.10587	0.124987	11.3022	0.534931	0.613439	0.000980315	0.0146732	1.31859
569	D2GU33_AILME	D2GU33	tr|D2GU33|D2GU33_AILME	D2GU33_AILME Fructose-bisphosphate aldolase OS=Ailuropoda melanoleuca (Giant panda) GN=PANDA_000117 PE=3 SV=1	PANDA_000117	9646	tr|D2GU33|D2GU33_AILME; tr|G1LE20|G1LE20_AILME	99	4	4	2	10,99	39367	6.04	ALDOC_HUMAN	P09972	3.7e-199	0.986	1	Fructose-bisphosphate aldolase C OS=Homo sapiens (Human) GN=ALDOC PE=1 SV=2	0.559808	0.842393	0.713603	0.788899	0.772108	1.06183	0.690527	0.772108	0.775596	0.155042	19.99	1.17525	1.2039	1.24654	0.996743	1.0388	0.908751	1.17111	1.17111	1.10587	0.124987	11.3022	0.534931	0.613439	0.000980315	0.0146732	1.31859
638	D2I1K4_AILME	D2I1K4	tr|D2I1K4|D2I1K4_AILME	D2I1K4_AILME Uncharacterized protein OS=Ailuropoda melanoleuca (Giant panda) GN=ENO3 PE=3 SV=1	ENO3*	9646	tr|D2I1K4|D2I1K4_AILME	662,537	15	17	16	33,41	47112	7.08	ENOB_HUMAN	P13929	3.5e-185	0.982	0.998	Beta-enolase OS=Homo sapiens (Human) GN=ENO3 PE=1 SV=5	0.641593	0.813123	0.865644	0.846003	0.836681	1.34256	0.753562	0.836681	0.871309	0.221347	25.404	1.1533	1.40902	1.32957	1.16558	0.900575	1.04203	1.20914	1.16558	1.17274	0.169969	14.4933	0.34811	0.536566	0.015266	0.0451917	1.25605	ENOB
638	D2HA24_AILME	D2HA24	tr|D2HA24|D2HA24_AILME	D2HA24_AILME Putative uncharacterized protein OS=Ailuropoda melanoleuca (Giant panda) GN=PANDA_007227 PE=3 SV=1	PANDA_007227	9646	tr|D2HA24|D2HA24_AILME; tr|G1LB18|G1LB18_AILME	143,482	3	3	2	11,17	44756	6.16	ENOA_HUMAN	P06733	0	0.959	0.998	Alpha-enolase OS=Homo sapiens (Human) GN=ENO1 PE=1 SV=2	0.641593	0.813123	0.865644	0.846003	0.836681	1.34256	0.753562	0.836681	0.871309	0.221347	25.404	1.1533	1.40902	1.32957	1.16558	0.900575	1.04203	1.20914	1.16558	1.17274	0.169969	14.4933	0.34811	0.536566	0.015266	0.0451917	1.25605
638	D2H9H6_AILME	D2H9H6	tr|D2H9H6|D2H9H6_AILME	D2H9H6_AILME Putative uncharacterized protein OS=Ailuropoda melanoleuca (Giant panda) GN=PANDA_006972 PE=3 SV=1	PANDA_006972	9646	tr|D2H9H6|D2H9H6_AILME; tr|G1M611|G1M611_AILME	84,651	2	3	3	4,5	49960	7.88	FUMH_HUMAN	P07954	1.8e-192	0.959	0.987	Fumarate hydratase, mitochondrial OS=Homo sapiens (Human) GN=FH PE=1 SV=3	0.641593	0.813123	0.865644	0.846003	0.836681	1.34256	0.753562	0.836681	0.871309	0.221347	25.404	1.1533	1.40902	1.32957	1.16558	0.900575	1.04203	1.20914	1.16558	1.17274	0.169969	14.4933	0.34811	0.536566	0.015266	0.0451917	1.25605
647	D2I1K4_AILME	D2I1K4	tr|D2I1K4|D2I1K4_AILME	D2I1K4_AILME Uncharacterized protein OS=Ailuropoda melanoleuca (Giant panda) GN=ENO3 PE=3 SV=1	ENO3*	9646	tr|D2I1K4|D2I1K4_AILME	637,453	19	20	19	35,94	47112	7.08	ENOB_HUMAN	P13929	3.5e-185	0.982	0.998	Beta-enolase OS=Homo sapiens (Human) GN=ENO3 PE=1 SV=5	0.587663	0.713469	0.80686	0.847847	0.81542	1.18323	0.742326	0.80686	0.813831	0.184391	22.6572	1.23131	1.45087	1.38561	1.28449	0.873552	1.21555	1.32308	1.28449	1.25207	0.18641	14.8881	0.135064	0.979558	0.000832782	0.00639269	1.39246	ENOB
647	D2HA24_AILME	D2HA24	tr|D2HA24|D2HA24_AILME	D2HA24_AILME Putative uncharacterized protein OS=Ailuropoda melanoleuca (Giant panda) GN=PANDA_007227 PE=3 SV=1	PANDA_007227	9646	tr|D2HA24|D2HA24_AILME; tr|G1LB18|G1LB18_AILME	120,203	2	2	1	8,01	44756	6.16	ENOA_HUMAN	P06733	0	0.959	0.998	Alpha-enolase OS=Homo sapiens (Human) GN=ENO1 PE=1 SV=2	0.587663	0.713469	0.80686	0.847847	0.81542	1.18323	0.742326	0.80686	0.813831	0.184391	22.6572	1.23131	1.45087	1.38561	1.28449	0.873552	1.21555	1.32308	1.28449	1.25207	0.18641	14.8881	0.135064	0.979558	0.000832782	0.00639269	1.39246
647	D2H9H6_AILME	D2H9H6	tr|D2H9H6|D2H9H6_AILME	D2H9H6_AILME Putative uncharacterized protein OS=Ailuropoda melanoleuca (Giant panda) GN=PANDA_006972 PE=3 SV=1	PANDA_006972	9646	tr|D2H9H6|D2H9H6_AILME; tr|G1M611|G1M611_AILME	61,074	3	3	3	7,07	49960	7.88	FUMH_HUMAN	P07954	1.8e-192	0.959	0.987	Fumarate hydratase, mitochondrial OS=Homo sapiens (Human) GN=FH PE=1 SV=3	0.587663	0.713469	0.80686	0.847847	0.81542	1.18323	0.742326	0.80686	0.813831	0.184391	22.6572	1.23131	1.45087	1.38561	1.28449	0.873552	1.21555	1.32308	1.28449	1.25207	0.18641	14.8881	0.135064	0.979558	0.000832782	0.00639269	1.39246
675	D2HQR1_AILME	D2HQR1	tr|D2HQR1|D2HQR1_AILME	D2HQR1_AILME Putative uncharacterized protein OS=Ailuropoda melanoleuca (Giant panda) GN=PANDA_014252 PE=3 SV=1	PANDA_014252	9646	tr|D2HQR1|D2HQR1_AILME; tr|G1MEI9|G1MEI9_AILME	692,746	25	25	25	49,22	51343	5.09	DESM_HUMAN	P17661	1.4e-102	0.971	0.993	Desmin OS=Homo sapiens (Human) GN=DES PE=1 SV=3	1.14791	1.15033	1.14452	1.54427	0.991511	1.22419	1.25839	1.15033	1.20873	0.170151	14.0768	0.907255	0.849809	0.896239	0.922853	0.883519	0.858629	0.842454	0.883519	0.880108	0.0306407	3.48147	0.0301607	0.000636756	0.00198416	0.00174212	0.831154
675	D2H363_AILME	D2H363	tr|D2H363|D2H363_AILME	D2H363_AILME ATP synthase subunit beta OS=Ailuropoda melanoleuca (Giant panda) GN=ATP5B PE=3 SV=1	ATP5B*	9646	tr|D2H363|D2H363_AILME	497,318	13	15	15	31,63	56369	5.15	ATPB_HUMAN	P06576	0	0.972	0.989	ATP synthase subunit beta, mitochondrial OS=Homo sapiens (Human) GN=ATP5B PE=1 SV=3	1.14791	1.15033	1.14452	1.54427	0.991511	1.22419	1.25839	1.15033	1.20873	0.170151	14.0768	0.907255	0.849809	0.896239	0.922853	0.883519	0.858629	0.842454	0.883519	0.880108	0.0306407	3.48147	0.0301607	0.000636756	0.00198416	0.00174212	0.831154	ATP5B
675	D2GZ42_AILME	D2GZ42	tr|D2GZ42|D2GZ42_AILME	D2GZ42_AILME Uncharacterized protein OS=Ailuropoda melanoleuca (Giant panda) GN=ACTA2 PE=3 SV=1	ACTA2	9646	tr|D2GZ42|D2GZ42_AILME; tr|D2H7R6|D2H7R6_AILME; tr|G1LRC6|G1LRC6_AILME	440,81	14	16	16	35,01	42009	5.24	ACTA_HUMAN	P62736	5.9e-191	1	1	Actin, aortic smooth muscle OS=Homo sapiens (Human) GN=ACTA2 PE=1 SV=1	1.14791	1.15033	1.14452	1.54427	0.991511	1.22419	1.25839	1.15033	1.20873	0.170151	14.0768	0.907255	0.849809	0.896239	0.922853	0.883519	0.858629	0.842454	0.883519	0.880108	0.0306407	3.48147	0.0301607	0.000636756	0.00198416	0.00174212	0.831154
675	G1LEJ5_AILME	G1LEJ5	tr|G1LEJ5|G1LEJ5_AILME	G1LEJ5_AILME Uncharacterized protein OS=Ailuropoda melanoleuca (Giant panda) GN=ALB PE=4 SV=1	ALB	9646	tr|G1LEJ5|G1LEJ5_AILME	241,604	7	7	6	12,56	69245	5.64	ALBU_HUMAN	P02768	0	0.791	0.94	Serum albumin OS=Homo sapiens (Human) GN=ALB PE=1 SV=2	1.14791	1.15033	1.14452	1.54427	0.991511	1.22419	1.25839	1.15033	1.20873	0.170151	14.0768	0.907255	0.849809	0.896239	0.922853	0.883519	0.858629	0.842454	0.883519	0.880108	0.0306407	3.48147	0.0301607	0.000636756	0.00198416	0.00174212	0.831154
675	D2HEW5_AILME	D2HEW5	tr|D2HEW5|D2HEW5_AILME	D2HEW5_AILME Putative uncharacterized protein OS=Ailuropoda melanoleuca (Giant panda) GN=PANDA_009370 PE=3 SV=1	PANDA_009370	9646	tr|D2HEW5|D2HEW5_AILME; tr|D2HJB1|D2HJB1_AILME; tr|D2HWS0|D2HWS0_AILME; tr|G1L1Q3|G1L1Q3_AILME; tr|G1L430|G1L430_AILME; tr|G1LJY9|G1LJY9_AILME; tr|G1LX08|G1LX08_AILME; tr|G1M0C1|G1M0C1_AILME	32,394	2	2	2	4,89	49956	4.98	TBA3C_HUMAN	Q13748	0	1	1	Tubulin alpha-3C/D chain OS=Homo sapiens (Human) GN=TUBA3C PE=1 SV=3	1.14791	1.15033	1.14452	1.54427	0.991511	1.22419	1.25839	1.15033	1.20873	0.170151	14.0768	0.907255	0.849809	0.896239	0.922853	0.883519	0.858629	0.842454	0.883519	0.880108	0.0306407	3.48147	0.0301607	0.000636756	0.00198416	0.00174212	0.831154
679	D2HQR1_AILME	D2HQR1	tr|D2HQR1|D2HQR1_AILME	D2HQR1_AILME Putative uncharacterized protein OS=Ailuropoda melanoleuca (Giant panda) GN=PANDA_014252 PE=3 SV=1	PANDA_014252	9646	tr|D2HQR1|D2HQR1_AILME; tr|G1MEI9|G1MEI9_AILME	728,044	22	22	20	46,34	51343	5.09	DESM_HUMAN	P17661	1.4e-102	0.971	0.993	Desmin OS=Homo sapiens (Human) GN=DES PE=1 SV=3	1.21297	1.38546	1.08618	1.64203	0.991279	1.14096	1.30905	1.21297	1.25256	0.216991	17.3238	0.994362	0.86351	0.864719	0.966065	1.09811	0.915935	0.817759	0.915935	0.931494	0.0958876	10.294	0.200834	0.0674423	0.00681663	0.0173038	0.813923
679	D2H363_AILME	D2H363	tr|D2H363|D2H363_AILME	D2H363_AILME ATP synthase subunit beta OS=Ailuropoda melanoleuca (Giant panda) GN=ATP5B PE=3 SV=1	ATP5B*	9646	tr|D2H363|D2H363_AILME	482,998	11	13	13	27,46	56369	5.15	ATPB_HUMAN	P06576	0	0.972	0.989	ATP synthase subunit beta, mitochondrial OS=Homo sapiens (Human) GN=ATP5B PE=1 SV=3	1.21297	1.38546	1.08618	1.64203	0.991279	1.14096	1.30905	1.21297	1.25256	0.216991	17.3238	0.994362	0.86351	0.864719	0.966065	1.09811	0.915935	0.817759	0.915935	0.931494	0.0958876	10.294	0.200834	0.0674423	0.00681663	0.0173038	0.813923	ATP5B
679	G1LEJ5_AILME	G1LEJ5	tr|G1LEJ5|G1LEJ5_AILME	G1LEJ5_AILME Uncharacterized protein OS=Ailuropoda melanoleuca (Giant panda) GN=ALB PE=4 SV=1	ALB	9646	tr|G1LEJ5|G1LEJ5_AILME	352,135	10	10	10	14,36	69245	5.64	ALBU_HUMAN	P02768	0	0.791	0.94	Serum albumin OS=Homo sapiens (Human) GN=ALB PE=1 SV=2	1.21297	1.38546	1.08618	1.64203	0.991279	1.14096	1.30905	1.21297	1.25256	0.216991	17.3238	0.994362	0.86351	0.864719	0.966065	1.09811	0.915935	0.817759	0.915935	0.931494	0.0958876	10.294	0.200834	0.0674423	0.00681663	0.0173038	0.813923
679	D2HHD7_AILME	D2HHD7	tr|D2HHD7|D2HHD7_AILME	D2HHD7_AILME Putative uncharacterized protein OS=Ailuropoda melanoleuca (Giant panda) GN=PANDA_010511 PE=4 SV=1	PANDA_010511	9646	tr|D2HHD7|D2HHD7_AILME; tr|G1L4L4|G1L4L4_AILME	78,982	3	3	0	5,2	45541	5.3	K2C7_HUMAN	P08729	3.6e-93	0.871	0.958	Keratin, type II cytoskeletal 7 OS=Homo sapiens (Human) GN=KRT7 PE=1 SV=5	1.21297	1.38546	1.08618	1.64203	0.991279	1.14096	1.30905	1.21297	1.25256	0.216991	17.3238	0.994362	0.86351	0.864719	0.966065	1.09811	0.915935	0.817759	0.915935	0.931494	0.0958876	10.294	0.200834	0.0674423	0.00681663	0.0173038	0.813923
710	D2HQR1_AILME	D2HQR1	tr|D2HQR1|D2HQR1_AILME	D2HQR1_AILME Putative uncharacterized protein OS=Ailuropoda melanoleuca (Giant panda) GN=PANDA_014252 PE=3 SV=1	PANDA_014252	9646	tr|D2HQR1|D2HQR1_AILME; tr|G1MEI9|G1MEI9_AILME	645,838	23	23	20	46,78	51343	5.09	DESM_HUMAN	P17661	1.4e-102	0.971	0.993	Desmin OS=Homo sapiens (Human) GN=DES PE=1 SV=3	0.90257	0.441023	1.26932	0.70178	0.909126	1.00314	0.69595	0.90257	0.84613	0.26407	31.2092	1.02835	1.34468	0.851865	1.47926	1.16548	1.49242	1.51033	1.34468	1.26748	0.258428	20.3891	0.576812	0.959467	0.0107241	0.0561423	1.35859
710	G1LRC6_AILME	G1LRC6	tr|G1LRC6|G1LRC6_AILME	G1LRC6_AILME Uncharacterized protein OS=Ailuropoda melanoleuca (Giant panda) GN=ACTA1 PE=3 SV=1	ACTA1	9646	tr|G1LRC6|G1LRC6_AILME	461,597	15	16	16	39,57	42020	5.48	ACTS_HUMAN	P68133	4.7e-135	0.932	0.942	Actin, alpha skeletal muscle OS=Homo sapiens (Human) GN=ACTA1 PE=1 SV=1	0.90257	0.441023	1.26932	0.70178	0.909126	1.00314	0.69595	0.90257	0.84613	0.26407	31.2092	1.02835	1.34468	0.851865	1.47926	1.16548	1.49242	1.51033	1.34468	1.26748	0.258428	20.3891	0.576812	0.959467	0.0107241	0.0561423	1.35859
710	D2HEM3_AILME	D2HEM3	tr|D2HEM3|D2HEM3_AILME	D2HEM3_AILME Putative uncharacterized protein OS=Ailuropoda melanoleuca (Giant panda) GN=PANDA_009257 PE=3 SV=1	PANDA_009257	9646	tr|D2HEM3|D2HEM3_AILME; tr|G1LID2|G1LID2_AILME	252,389	10	10	10	18,53	46776	5.62	A1AT_HUMAN	P01009	1.7e-155	0.717	0.933	Alpha-1-antitrypsin OS=Homo sapiens (Human) GN=SERPINA1 PE=1 SV=3	0.90257	0.441023	1.26932	0.70178	0.909126	1.00314	0.69595	0.90257	0.84613	0.26407	31.2092	1.02835	1.34468	0.851865	1.47926	1.16548	1.49242	1.51033	1.34468	1.26748	0.258428	20.3891	0.576812	0.959467	0.0107241	0.0561423	1.35859
710	D2H363_AILME	D2H363	tr|D2H363|D2H363_AILME	D2H363_AILME ATP synthase subunit beta OS=Ailuropoda melanoleuca (Giant panda) GN=ATP5B PE=3 SV=1	ATP5B	9646	tr|D2H363|D2H363_AILME	164,942	6	6	6	15,15	56369	5.15	ATPB_HUMAN	P06576	0	0.972	0.989	ATP synthase subunit beta, mitochondrial OS=Homo sapiens (Human) GN=ATP5B PE=1 SV=3	0.90257	0.441023	1.26932	0.70178	0.909126	1.00314	0.69595	0.90257	0.84613	0.26407	31.2092	1.02835	1.34468	0.851865	1.47926	1.16548	1.49242	1.51033	1.34468	1.26748	0.258428	20.3891	0.576812	0.959467	0.0107241	0.0561423	1.35859
710	G1LEJ5_AILME	G1LEJ5	tr|G1LEJ5|G1LEJ5_AILME	G1LEJ5_AILME Uncharacterized protein OS=Ailuropoda melanoleuca (Giant panda) GN=ALB PE=4 SV=1	ALB	9646	tr|G1LEJ5|G1LEJ5_AILME	113,789	4	4	4	7,34	69245	5.64	ALBU_HUMAN	P02768	0	0.791	0.94	Serum albumin OS=Homo sapiens (Human) GN=ALB PE=1 SV=2	0.90257	0.441023	1.26932	0.70178	0.909126	1.00314	0.69595	0.90257	0.84613	0.26407	31.2092	1.02835	1.34468	0.851865	1.47926	1.16548	1.49242	1.51033	1.34468	1.26748	0.258428	20.3891	0.576812	0.959467	0.0107241	0.0561423	1.35859
710	D2HCA2_AILME	D2HCA2	tr|D2HCA2|D2HCA2_AILME	D2HCA2_AILME Putative uncharacterized protein OS=Ailuropoda melanoleuca (Giant panda) GN=PANDA_008202 PE=4 SV=1	PANDA_008202	9646	tr|D2HCA2|D2HCA2_AILME; tr|G1LHM6|G1LHM6_AILME	77,278	3	3	3	6,86	47296	5.11	VTDB_HUMAN	P02774	4e-181	0.849	0.962	Vitamin D-binding protein OS=Homo sapiens (Human) GN=GC PE=1 SV=1	0.90257	0.441023	1.26932	0.70178	0.909126	1.00314	0.69595	0.90257	0.84613	0.26407	31.2092	1.02835	1.34468	0.851865	1.47926	1.16548	1.49242	1.51033	1.34468	1.26748	0.258428	20.3891	0.576812	0.959467	0.0107241	0.0561423	1.35859
710	G1LVM5_AILME	G1LVM5	tr|G1LVM5|G1LVM5_AILME	G1LVM5_AILME Uncharacterized protein OS=Ailuropoda melanoleuca (Giant panda) GN=VIM PE=3 SV=1	VIM	9646	tr|G1LVM5|G1LVM5_AILME	76,477	4	4	1	7,41	55650	5.21	VIME_HUMAN	P08670	5.7e-91	0.981	1	Vimentin OS=Homo sapiens (Human) GN=VIM PE=1 SV=4	0.90257	0.441023	1.26932	0.70178	0.909126	1.00314	0.69595	0.90257	0.84613	0.26407	31.2092	1.02835	1.34468	0.851865	1.47926	1.16548	1.49242	1.51033	1.34468	1.26748	0.258428	20.3891	0.576812	0.959467	0.0107241	0.0561423	1.35859
710	D2HHD7_AILME	D2HHD7	tr|D2HHD7|D2HHD7_AILME	D2HHD7_AILME Putative uncharacterized protein OS=Ailuropoda melanoleuca (Giant panda) GN=PANDA_010511 PE=4 SV=1	PANDA_010511	9646	tr|D2HHD7|D2HHD7_AILME; tr|G1L4L4|G1L4L4_AILME	37,757	3	3	0	5,2	45541	5.3	K2C7_HUMAN	P08729	3.6e-93	0.871	0.958	Keratin, type II cytoskeletal 7 OS=Homo sapiens (Human) GN=KRT7 PE=1 SV=5	0.90257	0.441023	1.26932	0.70178	0.909126	1.00314	0.69595	0.90257	0.84613	0.26407	31.2092	1.02835	1.34468	0.851865	1.47926	1.16548	1.49242	1.51033	1.34468	1.26748	0.258428	20.3891	0.576812	0.959467	0.0107241	0.0561423	1.35859
736	G1M5B6_AILME	G1M5B6	tr|G1M5B6|G1M5B6_AILME	G1M5B6_AILME Uncharacterized protein OS=Ailuropoda melanoleuca (Giant panda) GN=HSPD1 PE=3 SV=1	HSPD1	9646	tr|G1M5B6|G1M5B6_AILME	425,779	17	18	18	29,57	61305	5.6	CH60_HUMAN	P10809	0	0.976	0.995	60 kDa heat shock protein, mitochondrial OS=Homo sapiens (Human) GN=HSPD1 PE=1 SV=2	1.12428	0.927792	1.13693	1.34617	1.25434	1.14033	1.40509	1.14033	1.1907	0.159762	13.4174	0.85976	0.872585	1.05034	0.868932	0.982309	0.82293	0.905401	0.872585	0.908895	0.0797179	8.77086	0.178048	0.114912	0.0025029	0.00485598	0.830619
736	D2GZ42_AILME	D2GZ42	tr|D2GZ42|D2GZ42_AILME	D2GZ42_AILME Uncharacterized protein OS=Ailuropoda melanoleuca (Giant panda) GN=ACTA2 PE=3 SV=1	ACTA2	9646	tr|D2GZ42|D2GZ42_AILME; tr|D2H7R6|D2H7R6_AILME; tr|D2HH73|D2HH73_AILME; tr|G1LRC6|G1LRC6_AILME	170,451	6	6	6	18,04	42009	5.24	ACTA_HUMAN	P62736	5.9e-191	1	1	Actin, aortic smooth muscle OS=Homo sapiens (Human) GN=ACTA2 PE=1 SV=1	1.12428	0.927792	1.13693	1.34617	1.25434	1.14033	1.40509	1.14033	1.1907	0.159762	13.4174	0.85976	0.872585	1.05034	0.868932	0.982309	0.82293	0.905401	0.872585	0.908895	0.0797179	8.77086	0.178048	0.114912	0.0025029	0.00485598	0.830619
736	D2I061_AILME	D2I061	tr|D2I061|D2I061_AILME	D2I061_AILME Putative uncharacterized protein OS=Ailuropoda melanoleuca (Giant panda) GN=PANDA_018508 PE=4 SV=1	PANDA_018508	9646	tr|D2I061|D2I061_AILME; tr|G1LEJ5|G1LEJ5_AILME	122,818	6	6	6	10,75	62017	5.37	ALBU_HUMAN	P02768	0	0.8	0.945	Serum albumin OS=Homo sapiens (Human) GN=ALB PE=1 SV=2	1.12428	0.927792	1.13693	1.34617	1.25434	1.14033	1.40509	1.14033	1.1907	0.159762	13.4174	0.85976	0.872585	1.05034	0.868932	0.982309	0.82293	0.905401	0.872585	0.908895	0.0797179	8.77086	0.178048	0.114912	0.0025029	0.00485598	0.830619
736	D2HJY8_AILME	D2HJY8	tr|D2HJY8|D2HJY8_AILME	D2HJY8_AILME Putative uncharacterized protein OS=Ailuropoda melanoleuca (Giant panda) GN=PANDA_011655 PE=4 SV=1	PANDA_011655	9646	tr|D2HJY8|D2HJY8_AILME; tr|G1LJG4|G1LJG4_AILME	31,244	2	2	2	4,07	55678	5.26	UBP14_HUMAN	P54578	0	0.99	1	Ubiquitin carboxyl-terminal hydrolase 14 OS=Homo sapiens (Human) GN=USP14 PE=1 SV=3	1.12428	0.927792	1.13693	1.34617	1.25434	1.14033	1.40509	1.14033	1.1907	0.159762	13.4174	0.85976	0.872585	1.05034	0.868932	0.982309	0.82293	0.905401	0.872585	0.908895	0.0797179	8.77086	0.178048	0.114912	0.0025029	0.00485598	0.830619
801	G1LEJ5_AILME	G1LEJ5	tr|G1LEJ5|G1LEJ5_AILME	G1LEJ5_AILME Uncharacterized protein OS=Ailuropoda melanoleuca (Giant panda) GN=ALB PE=4 SV=1	ALB	9646	tr|G1LEJ5|G1LEJ5_AILME	1289,964	37	39	4	57,75	69245	5.64	ALBU_HUMAN	P02768	0	0.791	0.94	Serum albumin OS=Homo sapiens (Human) GN=ALB PE=1 SV=2	0.643009	1.11005	0.799425	0.764506	0.927415	1.05666	0.94896	0.927415	0.892861	0.16632	18.6278	1.14062	1.04662	1.16752	0.827249	1.83327	1.24958	1.09638	1.14062	1.19446	0.311196	26.0532	0.0523515	0.152706	0.0495375	0.0494478	1.15926
801	D2I061_AILME	D2I061	tr|D2I061|D2I061_AILME	D2I061_AILME Putative uncharacterized protein OS=Ailuropoda melanoleuca (Giant panda) GN=PANDA_018508 PE=4 SV=1	PANDA_018508	9646	tr|D2I061|D2I061_AILME	1167,781	35	37	2	60,84	62017	5.37	ALBU_HUMAN	P02768	0	0.8	0.945	Serum albumin OS=Homo sapiens (Human) GN=ALB PE=1 SV=2	0.643009	1.11005	0.799425	0.764506	0.927415	1.05666	0.94896	0.927415	0.892861	0.16632	18.6278	1.14062	1.04662	1.16752	0.827249	1.83327	1.24958	1.09638	1.14062	1.19446	0.311196	26.0532	0.0523515	0.152706	0.0495375	0.0494478	1.15926
801	D2GYC0_AILME	D2GYC0	tr|D2GYC0|D2GYC0_AILME	D2GYC0_AILME Uncharacterized protein OS=Ailuropoda melanoleuca (Giant panda) GN=HSPA8 PE=3 SV=1	HSPA8	9646	tr|D2GYC0|D2GYC0_AILME	612,202	20	21	21	32,66	70898	5.37	HSP7C_HUMAN	P11142	0	1	1	Heat shock cognate 71 kDa protein OS=Homo sapiens (Human) GN=HSPA8 PE=1 SV=1	0.643009	1.11005	0.799425	0.764506	0.927415	1.05666	0.94896	0.927415	0.892861	0.16632	18.6278	1.14062	1.04662	1.16752	0.827249	1.83327	1.24958	1.09638	1.14062	1.19446	0.311196	26.0532	0.0523515	0.152706	0.0495375	0.0494478	1.15926
803	G1LEJ5_AILME	G1LEJ5	tr|G1LEJ5|G1LEJ5_AILME	G1LEJ5_AILME Uncharacterized protein OS=Ailuropoda melanoleuca (Giant panda) GN=ALB PE=4 SV=1	ALB	9646	tr|G1LEJ5|G1LEJ5_AILME	1134,88	32	35	3	43,88	69245	5.64	ALBU_HUMAN	P02768	0	0.791	0.94	Serum albumin OS=Homo sapiens (Human) GN=ALB PE=1 SV=2	0.567546	1.18177	0.723569	0.640294	0.90947	0.979105	0.921364	0.90947	0.84616	0.214091	25.3014	1.17627	1.08475	1.2609	0.6969	2.04795	1.38881	1.09046	1.17627	1.24943	0.412357	33.0035	0.110155	0.135655	0.0472279	0.0417634	1.20314
803	D2I061_AILME	D2I061	tr|D2I061|D2I061_AILME	D2I061_AILME Putative uncharacterized protein OS=Ailuropoda melanoleuca (Giant panda) GN=PANDA_018508 PE=4 SV=1	PANDA_018508	9646	tr|D2I061|D2I061_AILME	1000,761	31	34	2	47,18	62017	5.37	ALBU_HUMAN	P02768	0	0.8	0.945	Serum albumin OS=Homo sapiens (Human) GN=ALB PE=1 SV=2	0.567546	1.18177	0.723569	0.640294	0.90947	0.979105	0.921364	0.90947	0.84616	0.214091	25.3014	1.17627	1.08475	1.2609	0.6969	2.04795	1.38881	1.09046	1.17627	1.24943	0.412357	33.0035	0.110155	0.135655	0.0472279	0.0417634	1.20314
803	D2GYC0_AILME	D2GYC0	tr|D2GYC0|D2GYC0_AILME	D2GYC0_AILME Uncharacterized protein OS=Ailuropoda melanoleuca (Giant panda) GN=HSPA8 PE=3 SV=1	HSPA8	9646	tr|D2GYC0|D2GYC0_AILME	633,226	18	19	16	25,7	70898	5.37	HSP7C_HUMAN	P11142	0	1	1	Heat shock cognate 71 kDa protein OS=Homo sapiens (Human) GN=HSPA8 PE=1 SV=1	0.567546	1.18177	0.723569	0.640294	0.90947	0.979105	0.921364	0.90947	0.84616	0.214091	25.3014	1.17627	1.08475	1.2609	0.6969	2.04795	1.38881	1.09046	1.17627	1.24943	0.412357	33.0035	0.110155	0.135655	0.0472279	0.0417634	1.20314
803	D2I7G9_AILME	D2I7G9	tr|D2I7G9|D2I7G9_AILME	D2I7G9_AILME Uncharacterized protein OS=Ailuropoda melanoleuca (Giant panda) GN=HSPA1L PE=3 SV=1	HSPA1L	9646	tr|D2I7G9|D2I7G9_AILME; tr|D2I7H0|D2I7H0_AILME; tr|F2YI16|F2YI16_URSAR; tr|G1MKK0|G1MKK0_AILME	100,89	4	4	1	4,99	70380	5.95	HS71L_HUMAN	P34931	0	0.966	0.997	Heat shock 70 kDa protein 1-like OS=Homo sapiens (Human) GN=HSPA1L PE=1 SV=2	0.567546	1.18177	0.723569	0.640294	0.90947	0.979105	0.921364	0.90947	0.84616	0.214091	25.3014	1.17627	1.08475	1.2609	0.6969	2.04795	1.38881	1.09046	1.17627	1.24943	0.412357	33.0035	0.110155	0.135655	0.0472279	0.0417634	1.20314
1336	D2HJ05_AILME	D2HJ05	tr|D2HJ05|D2HJ05_AILME	D2HJ05_AILME Triosephosphate isomerase OS=Ailuropoda melanoleuca (Giant panda) GN=TPI1 PE=3 SV=1	TPI1*	9646	tr|D2HJ05|D2HJ05_AILME	219,32	7	7	7	33,08	28098	7.06	TPIS_HUMAN	P60174	8.6e-160	0.958	0.977	Triosephosphate isomerase OS=Homo sapiens (Human) GN=TPI1 PE=1 SV=3	1.04868	1.07855	0.593094	0.943236	0.554708	0.939031	0.929276	0.939031	0.869511	0.210217	24.1764	1.12562	0.860213	1.08196	1.45484	1.16904	1.29405	1.20162	1.16904	1.16962	0.184033	15.7344	0.688928	0.754587	0.0150674	0.0334457	1.17285	TPI1
1336	G8A3I2_AILME	G8A3I2	tr|G8A3I2|G8A3I2_AILME	G8A3I2_AILME Heat shock protein beta-1 OS=Ailuropoda melanoleuca (Giant panda) GN=HSPB1 PE=2 SV=1	HSPB1	9646	tr|G8A3I2|G8A3I2_AILME	102,959	3	3	1	15,94	22925	5.99	HSPB1_HUMAN	P04792	1.5e-69	0.899	0.961	Heat shock protein beta-1 OS=Homo sapiens (Human) GN=HSPB1 PE=1 SV=2	1.04868	1.07855	0.593094	0.943236	0.554708	0.939031	0.929276	0.939031	0.869511	0.210217	24.1764	1.12562	0.860213	1.08196	1.45484	1.16904	1.29405	1.20162	1.16904	1.16962	0.184033	15.7344	0.688928	0.754587	0.0150674	0.0334457	1.17285
1336	D2GVQ9_AILME	D2GVQ9	tr|D2GVQ9|D2GVQ9_AILME	D2GVQ9_AILME Proteasome subunit alpha type OS=Ailuropoda melanoleuca (Giant panda) GN=PANDA_000829 PE=3 SV=1	PANDA_000829	9646	tr|D2GVQ9|D2GVQ9_AILME; tr|G1L6X6|G1L6X6_AILME	40,728	2	2	2	10,86	19232	7.86	PSA3_HUMAN	P25788	5.3e-88	0.989	1	Proteasome subunit alpha type-3 OS=Homo sapiens (Human) GN=PSMA3 PE=1 SV=2	1.04868	1.07855	0.593094	0.943236	0.554708	0.939031	0.929276	0.939031	0.869511	0.210217	24.1764	1.12562	0.860213	1.08196	1.45484	1.16904	1.29405	1.20162	1.16904	1.16962	0.184033	15.7344	0.688928	0.754587	0.0150674	0.0334457	1.17285
1336	D2HDG5_AILME	D2HDG5	tr|D2HDG5|D2HDG5_AILME	D2HDG5_AILME Uncharacterized protein OS=Ailuropoda melanoleuca (Giant panda) GN=PSMB7 PE=4 SV=1	PSMB7	9646	tr|D2HDG5|D2HDG5_AILME	34,988	2	2	2	8,3	29936	7.57	PSB7_HUMAN	Q99436	2.8e-145	0.96	0.986	Proteasome subunit beta type-7 OS=Homo sapiens (Human) GN=PSMB7 PE=1 SV=1	1.04868	1.07855	0.593094	0.943236	0.554708	0.939031	0.929276	0.939031	0.869511	0.210217	24.1764	1.12562	0.860213	1.08196	1.45484	1.16904	1.29405	1.20162	1.16904	1.16962	0.184033	15.7344	0.688928	0.754587	0.0150674	0.0334457	1.17285
1336	D2HLM5_AILME	D2HLM5	tr|D2HLM5|D2HLM5_AILME	D2HLM5_AILME Putative uncharacterized protein OS=Ailuropoda melanoleuca (Giant panda) GN=PANDA_012411 PE=3 SV=1	PANDA_012411	9646	tr|D2HLM5|D2HLM5_AILME; tr|D2HLM6|D2HLM6_AILME; tr|G1LYS4|G1LYS4_AILME	22,931	2	2	1	2,81	60447	8.36	K2C6A_HUMAN	P02538	5.6e-94	0.893	0.97	Keratin, type II cytoskeletal 6A OS=Homo sapiens (Human) GN=KRT6A PE=1 SV=3	1.04868	1.07855	0.593094	0.943236	0.554708	0.939031	0.929276	0.939031	0.869511	0.210217	24.1764	1.12562	0.860213	1.08196	1.45484	1.16904	1.29405	1.20162	1.16904	1.16962	0.184033	15.7344	0.688928	0.754587	0.0150674	0.0334457	1.17285
1340	D2GVU9_AILME	D2GVU9	tr|D2GVU9|D2GVU9_AILME	D2GVU9_AILME Putative uncharacterized protein OS=Ailuropoda melanoleuca (Giant panda) GN=PANDA_000880 PE=4 SV=1	PANDA_000880	9646	tr|D2GVU9|D2GVU9_AILME	115,98	7	8	8	42,17	18922	4.91	MLRV_HUMAN	P10916	1.4e-62	0.958	0.988	Myosin regulatory light chain 2, ventricular/cardiac muscle isoform OS=Homo sapiens (Human) GN=MYL2 PE=1 SV=3	1.08619	1.47426	1.26595	1.48235	1.3676	1.59629	1.7554	1.47426	1.43258	0.218787	15.2723	0.884507	0.775417	1.18478	0.852787	1.21171	1.40648	1.01436	1.01436	1.04715	0.228867	21.8562	0.932475	0.915594	0.00736199	0.0124136	0.72704
1340	D2HQP9_AILME	D2HQP9	tr|D2HQP9|D2HQP9_AILME	D2HQP9_AILME Uncharacterized protein OS=Ailuropoda melanoleuca (Giant panda) GN=MYLPF PE=4 SV=1	MYLPF	9646	tr|D2HQP9|D2HQP9_AILME	38,817	3	3	3	17,06	19080	4.79	MLRS_HUMAN	Q96A32	2.6e-71	0.964	0.994	Myosin regulatory light chain 2, skeletal muscle isoform OS=Homo sapiens (Human) GN=MYLPF PE=2 SV=1	1.08619	1.47426	1.26595	1.48235	1.3676	1.59629	1.7554	1.47426	1.43258	0.218787	15.2723	0.884507	0.775417	1.18478	0.852787	1.21171	1.40648	1.01436	1.01436	1.04715	0.228867	21.8562	0.932475	0.915594	0.00736199	0.0124136	0.72704
1342	D2HMK2_AILME	D2HMK2	tr|D2HMK2|D2HMK2_AILME	D2HMK2_AILME Putative uncharacterized protein OS=Ailuropoda melanoleuca (Giant panda) GN=PANDA_012825 PE=3 SV=1	PANDA_012825	9646	tr|D2HMK2|D2HMK2_AILME; tr|G1L675|G1L675_AILME	309,273	13	14	14	47,1	28593	6.18	HPT_HUMAN	P00738	1.6e-104	0.846	0.954	Haptoglobin OS=Homo sapiens (Human) GN=HP PE=1 SV=1	0.477534	0.605852	0.367597	0.429269	0.52169	0.526011	0.483778	0.483778	0.48739	0.0758727	15.5671	1.66775	1.67209	1.70389	1.19233	1.70708	2.47681	1.2452	1.67209	1.66645	0.420717	25.2463	0.0248205	0.00064193	0.000252168	0.000248503	2.27885
1342	D2GZ42_AILME	D2GZ42	tr|D2GZ42|D2GZ42_AILME	D2GZ42_AILME Uncharacterized protein OS=Ailuropoda melanoleuca (Giant panda) GN=ACTA2 PE=3 SV=1	ACTA2	9646	tr|D2GZ42|D2GZ42_AILME; tr|D2H7R6|D2H7R6_AILME; tr|G1LRC6|G1LRC6_AILME	216,606	9	10	10	25,46	42009	5.24	ACTA_HUMAN	P62736	5.9e-191	1	1	Actin, aortic smooth muscle OS=Homo sapiens (Human) GN=ACTA2 PE=1 SV=1	0.477534	0.605852	0.367597	0.429269	0.52169	0.526011	0.483778	0.483778	0.48739	0.0758727	15.5671	1.66775	1.67209	1.70389	1.19233	1.70708	2.47681	1.2452	1.67209	1.66645	0.420717	25.2463	0.0248205	0.00064193	0.000252168	0.000248503	2.27885
1347	R9RZM3_URSMA	R9RZM3	tr|R9RZM3|R9RZM3_URSMA	R9RZM3_URSMA Myoglobin OS=Ursus maritimus (Polar bear) (Thalarctos maritimus) GN=Mb PE=2 SV=1	Mb	29073	tr|R9RZM3|R9RZM3_URSMA	244,384	6	6	4	46,75	17177	7.96	MYG_HUMAN	P02144	3.3e-63	0.922	0.974	Myoglobin OS=Homo sapiens (Human) GN=MB PE=1 SV=2	0.652169	1.04257	0.633851	0.810129	0.876555	0.845964	1.09424	0.845964	0.850783	0.175547	20.6336	1.192	1.08031	1.40338	1.11232	1.25812	1.35942	1.41984	1.25812	1.26077	0.138271	10.9672	0.481566	0.576093	0.000460785	0.00320972	1.33068
1347	HBA_URSMA	P68235	sp|P68235|HBA_URSMA	HBA_URSMA Hemoglobin subunit alpha OS=Ursus maritimus (Polar bear) (Thalarctos maritimus) GN=HBA PE=1 SV=2	HBA	29073	sp|P68235|HBA_URSMA; sp|P68236|HBA_URSTH; sp|P68237|HBA_HELMA	56,929	2	2	2	14,08	15241	8.07	HBA_HUMAN	P69905	3.5e-55	0.845	0.965	Hemoglobin subunit alpha OS=Homo sapiens (Human) GN=HBA1 PE=1 SV=2	0.652169	1.04257	0.633851	0.810129	0.876555	0.845964	1.09424	0.845964	0.850783	0.175547	20.6336	1.192	1.08031	1.40338	1.11232	1.25812	1.35942	1.41984	1.25812	1.26077	0.138271	10.9672	0.481566	0.576093	0.000460785	0.00320972	1.33068
1347	HBB_URSMA	P68011	sp|P68011|HBB_URSMA	HBB_URSMA Hemoglobin subunit beta OS=Ursus maritimus (Polar bear) (Thalarctos maritimus) GN=HBB PE=1 SV=1	HBB	29073	sp|P68011|HBB_URSMA; sp|P68012|HBB_URSTH; sp|P68013|HBB_HELMA	35,814	2	2	2	13,01	16009	7.96	HBB_HUMAN	P68871	2.9e-64	0.897	0.959	Hemoglobin subunit beta OS=Homo sapiens (Human) GN=HBB PE=1 SV=2	0.652169	1.04257	0.633851	0.810129	0.876555	0.845964	1.09424	0.845964	0.850783	0.175547	20.6336	1.192	1.08031	1.40338	1.11232	1.25812	1.35942	1.41984	1.25812	1.26077	0.138271	10.9672	0.481566	0.576093	0.000460785	0.00320972	1.33068
1350	D2HHZ6_AILME	D2HHZ6	tr|D2HHZ6|D2HHZ6_AILME	D2HHZ6_AILME Malate dehydrogenase OS=Ailuropoda melanoleuca (Giant panda) GN=PANDA_010775 PE=3 SV=1	PANDA_010775*	9646	tr|D2HHZ6|D2HHZ6_AILME; tr|G1LFQ4|G1LFQ4_AILME	108,607	7	7	7	20,96	36383	6.52	MDHC_HUMAN	P40925	1.9e-209	0.955	0.994	Malate dehydrogenase, cytoplasmic OS=Homo sapiens (Human) GN=MDH1 PE=1 SV=4	0.678321	0.705288	0.837237	0.953123	0.91197	1.14599	0.901665	0.901665	0.876228	0.158386	18.0759	1.01861	1.34447	1.09266	1.33285	1.21106	1.22756	1.45484	1.22756	1.24029	0.151332	12.2013	0.857061	0.914629	0.000874098	0.00207004	1.25344	MDH1
1354	D2HNI5_AILME	D2HNI5	tr|D2HNI5|D2HNI5_AILME	D2HNI5_AILME Putative uncharacterized protein OS=Ailuropoda melanoleuca (Giant panda) GN=PANDA_013258 PE=3 SV=1	PANDA_013258	9646	tr|D2HNI5|D2HNI5_AILME	190,591	7	7	1	52,59	12956	6.08	FABPH_HUMAN	P05413	5.9e-54	0.888	0.966	Fatty acid-binding protein, heart OS=Homo sapiens (Human) GN=FABP3 PE=1 SV=4	1.29558	1.53389	1.26691	0.882818	1.80272	1.18085	1.12898	1.26691	1.29882	0.296091	22.7969	0.8152	0.96586	0.798116	0.674935	1.16689	0.914521	0.986002	0.914521	0.903074	0.158814	17.586	0.452446	0.154928	0.0120894	0.00148475	0.783284	FABP3
1354	G1MH78_AILME	G1MH78	tr|G1MH78|G1MH78_AILME	G1MH78_AILME Uncharacterized protein OS=Ailuropoda melanoleuca (Giant panda) GN=FABP3 PE=3 SV=1	FABP3	9646	tr|G1MH78|G1MH78_AILME	176,087	7	7	1	48,89	15019	6.34	FABPH_HUMAN	P05413	5.3e-65	0.895	0.97	Fatty acid-binding protein, heart OS=Homo sapiens (Human) GN=FABP3 PE=1 SV=4	1.29558	1.53389	1.26691	0.882818	1.80272	1.18085	1.12898	1.26691	1.29882	0.296091	22.7969	0.8152	0.96586	0.798116	0.674935	1.16689	0.914521	0.986002	0.914521	0.903074	0.158814	17.586	0.452446	0.154928	0.0120894	0.00148475	0.783284	FABP3
1354	G1LCW8_AILME	G1LCW8	tr|G1LCW8|G1LCW8_AILME	G1LCW8_AILME Uncharacterized protein OS=Ailuropoda melanoleuca (Giant panda) GN=NDUFA5 PE=4 SV=1	NDUFA5	9646	tr|G1LCW8|G1LCW8_AILME	46,75	2	2	2	22,41	13392	5.9	NDUA5_HUMAN	Q16718	1.7e-44	0.914	0.983	NADH dehydrogenase [ubiquinone] 1 alpha subcomplex subunit 5 OS=Homo sapiens (Human) GN=NDUFA5 PE=1 SV=3	1.29558	1.53389	1.26691	0.882818	1.80272	1.18085	1.12898	1.26691	1.29882	0.296091	22.7969	0.8152	0.96586	0.798116	0.674935	1.16689	0.914521	0.986002	0.914521	0.903074	0.158814	17.586	0.452446	0.154928	0.0120894	0.00148475	0.783284
1355	G1LRC6_AILME	G1LRC6	tr|G1LRC6|G1LRC6_AILME	G1LRC6_AILME Uncharacterized protein OS=Ailuropoda melanoleuca (Giant panda) GN=ACTA1 PE=3 SV=1	ACTA1	9646	tr|G1LRC6|G1LRC6_AILME	1120,534	17	25	6	44,65	42020	5.48	ACTS_HUMAN	P68133	4.7e-135	0.932	0.942	Actin, alpha skeletal muscle OS=Homo sapiens (Human) GN=ACTA1 PE=1 SV=1	1.19832	2.08984	1.29956	1.02738	0.992219	0.950211	1.27641	1.19832	1.26199	0.390734	30.9617	0.833355	0.710774	1.0375	0.864412	0.648491	0.914999	1.00609	0.864412	0.859374	0.143529	16.7016	0.00707377	0.0281718	0.035162	0.0537402	0.793386
1355	D2H7R6_AILME	D2H7R6	tr|D2H7R6|D2H7R6_AILME	D2H7R6_AILME Uncharacterized protein OS=Ailuropoda melanoleuca (Giant panda) GN=ACTC1 PE=3 SV=1	ACTC1	9646	tr|D2H7R6|D2H7R6_AILME	1068,582	18	24	5	53,05	42019	5.23	ACTC_HUMAN	P68032	1.9e-200	1	1	Actin, alpha cardiac muscle 1 OS=Homo sapiens (Human) GN=ACTC1 PE=1 SV=1	1.19832	2.08984	1.29956	1.02738	0.992219	0.950211	1.27641	1.19832	1.26199	0.390734	30.9617	0.833355	0.710774	1.0375	0.864412	0.648491	0.914999	1.00609	0.864412	0.859374	0.143529	16.7016	0.00707377	0.0281718	0.035162	0.0537402	0.793386
1358	D2HJ05_AILME	D2HJ05	tr|D2HJ05|D2HJ05_AILME	D2HJ05_AILME Triosephosphate isomerase OS=Ailuropoda melanoleuca (Giant panda) GN=TPI1 PE=3 SV=1	TPI1*	9646	tr|D2HJ05|D2HJ05_AILME	632,189	16	17	17	70,34	28098	7.06	TPIS_HUMAN	P60174	8.6e-160	0.958	0.977	Triosephosphate isomerase OS=Homo sapiens (Human) GN=TPI1 PE=1 SV=3	0.751565	1.01835	0.763897	1.00423	0.832785	1.13697	0.776777	0.832785	0.897797	0.153433	17.09	1.19711	1.0548	1.06295	1.05294	1.02672	1.03458	1.03749	1.05294	1.06666	0.0589282	5.52457	0.0347836	0.0349796	0.0271647	0.053382	1.16486	TPI1
1358	G1L947_AILME	G1L947	tr|G1L947|G1L947_AILME	G1L947_AILME Uncharacterized protein OS=Ailuropoda melanoleuca (Giant panda) GN=ECHS1 PE=3 SV=1	ECHS1	9646	tr|G1L947|G1L947_AILME	124,488	5	5	5	22,68	31320	8.75	ECHM_HUMAN	P30084	3.1e-98	0.859	0.948	Enoyl-CoA hydratase, mitochondrial OS=Homo sapiens (Human) GN=ECHS1 PE=1 SV=4	0.751565	1.01835	0.763897	1.00423	0.832785	1.13697	0.776777	0.832785	0.897797	0.153433	17.09	1.19711	1.0548	1.06295	1.05294	1.02672	1.03458	1.03749	1.05294	1.06666	0.0589282	5.52457	0.0347836	0.0349796	0.0271647	0.053382	1.16486
1358	D2H5C2_AILME	D2H5C2	tr|D2H5C2|D2H5C2_AILME	D2H5C2_AILME Putative uncharacterized protein OS=Ailuropoda melanoleuca (Giant panda) GN=PANDA_005083 PE=4 SV=1	PANDA_005083	9646	tr|D2H5C2|D2H5C2_AILME; tr|G1L714|G1L714_AILME	73,951	3	3	3	12,85	28182	7.26	CAH3_HUMAN	P07451	3.3e-108	0.892	0.976	Carbonic anhydrase 3 OS=Homo sapiens (Human) GN=CA3 PE=1 SV=3	0.751565	1.01835	0.763897	1.00423	0.832785	1.13697	0.776777	0.832785	0.897797	0.153433	17.09	1.19711	1.0548	1.06295	1.05294	1.02672	1.03458	1.03749	1.05294	1.06666	0.0589282	5.52457	0.0347836	0.0349796	0.0271647	0.053382	1.16486
1358	D2H9W7_AILME	D2H9W7	tr|D2H9W7|D2H9W7_AILME	D2H9W7_AILME Uncharacterized protein OS=Ailuropoda melanoleuca (Giant panda) GN=CMBL PE=4 SV=1	CMBL	9646	tr|D2H9W7|D2H9W7_AILME	46,96	2	2	2	8,16	28102	6.83	CMBL_HUMAN	Q96DG6	1.9e-128	0.869	0.971	Carboxymethylenebutenolidase homolog OS=Homo sapiens (Human) GN=CMBL PE=1 SV=1	0.751565	1.01835	0.763897	1.00423	0.832785	1.13697	0.776777	0.832785	0.897797	0.153433	17.09	1.19711	1.0548	1.06295	1.05294	1.02672	1.03458	1.03749	1.05294	1.06666	0.0589282	5.52457	0.0347836	0.0349796	0.0271647	0.053382	1.16486
1358	D2H5L1_AILME	D2H5L1	tr|D2H5L1|D2H5L1_AILME	D2H5L1_AILME Uncharacterized protein OS=Ailuropoda melanoleuca (Giant panda) GN=PGAM4 PE=3 SV=1	PGAM4	9646	tr|D2H5L1|D2H5L1_AILME; tr|D2HNN1|D2HNN1_AILME; tr|G1MGM4|G1MGM4_AILME	39,28	2	2	2	8,27	28852	6.67	PGAM1_HUMAN	P18669	3.6e-112	0.992	1	Phosphoglycerate mutase 1 OS=Homo sapiens (Human) GN=PGAM1 PE=1 SV=2	0.751565	1.01835	0.763897	1.00423	0.832785	1.13697	0.776777	0.832785	0.897797	0.153433	17.09	1.19711	1.0548	1.06295	1.05294	1.02672	1.03458	1.03749	1.05294	1.06666	0.0589282	5.52457	0.0347836	0.0349796	0.0271647	0.053382	1.16486
1358	G1MJ35_AILME	G1MJ35	tr|G1MJ35|G1MJ35_AILME	G1MJ35_AILME Cytochrome b-c1 complex subunit Rieske, mitochondrial OS=Ailuropoda melanoleuca (Giant panda) GN=UQCRFS1 PE=4 SV=1	UQCRFS1	9646	tr|G1MJ35|G1MJ35_AILME	32,506	2	2	2	5,62	28658	8.6	UCRI_HUMAN	P47985	1.3e-109	0.865	0.949	Cytochrome b-c1 complex subunit Rieske, mitochondrial OS=Homo sapiens (Human) GN=UQCRFS1 PE=1 SV=2	0.751565	1.01835	0.763897	1.00423	0.832785	1.13697	0.776777	0.832785	0.897797	0.153433	17.09	1.19711	1.0548	1.06295	1.05294	1.02672	1.03458	1.03749	1.05294	1.06666	0.0589282	5.52457	0.0347836	0.0349796	0.0271647	0.053382	1.16486
1359	D2HG87_AILME	D2HG87	tr|D2HG87|D2HG87_AILME	D2HG87_AILME Alpha B-crystallin protein OS=Ailuropoda melanoleuca (Giant panda) GN=CRYAB PE=2 SV=1	CRYAB	9646	tr|D2HG87|D2HG87_AILME	209,596	8	9	9	42,86	20067	6.76	CRYAB_HUMAN	P02511	1.1e-75	0.983	1	Alpha-crystallin B chain OS=Homo sapiens (Human) GN=CRYAB PE=1 SV=2	0.598848	0.894248	0.822715	0.819683	0.389658	1.09852	0.766746	0.819683	0.77006	0.224564	29.1619	1.48086	0.876718	1.27449	1.08869	1.57111	0.997761	1.30025	1.27449	1.22712	0.253261	20.6386	0.966922	0.77742	0.00391641	0.0398441	1.3706
1359	D2HS57_AILME	D2HS57	tr|D2HS57|D2HS57_AILME	D2HS57_AILME Superoxide dismutase OS=Ailuropoda melanoleuca (Giant panda) GN=PANDA_014884 PE=3 SV=1	PANDA_014884	9646	tr|D2HS57|D2HS57_AILME; tr|G1MAE6|G1MAE6_AILME	88,486	2	2	2	13,55	23893	7.82	SODM_HUMAN	P04179	8.2e-105	0.911	0.967	Superoxide dismutase [Mn], mitochondrial OS=Homo sapiens (Human) GN=SOD2 PE=1 SV=2	0.598848	0.894248	0.822715	0.819683	0.389658	1.09852	0.766746	0.819683	0.77006	0.224564	29.1619	1.48086	0.876718	1.27449	1.08869	1.57111	0.997761	1.30025	1.27449	1.22712	0.253261	20.6386	0.966922	0.77742	0.00391641	0.0398441	1.3706
1359	HBB_URSMA	P68011	sp|P68011|HBB_URSMA	HBB_URSMA Hemoglobin subunit beta OS=Ursus maritimus (Polar bear) (Thalarctos maritimus) GN=HBB PE=1 SV=1	HBB	29073	sp|P68011|HBB_URSMA; sp|P68012|HBB_URSTH; sp|P68013|HBB_HELMA	83,811	3	3	3	21,23	16009	7.96	HBB_HUMAN	P68871	2.9e-64	0.897	0.959	Hemoglobin subunit beta OS=Homo sapiens (Human) GN=HBB PE=1 SV=2	0.598848	0.894248	0.822715	0.819683	0.389658	1.09852	0.766746	0.819683	0.77006	0.224564	29.1619	1.48086	0.876718	1.27449	1.08869	1.57111	0.997761	1.30025	1.27449	1.22712	0.253261	20.6386	0.966922	0.77742	0.00391641	0.0398441	1.3706
1359	D2HCP0_AILME	D2HCP0	tr|D2HCP0|D2HCP0_AILME	D2HCP0_AILME Putative uncharacterized protein OS=Ailuropoda melanoleuca (Giant panda) GN=PANDA_008374 PE=4 SV=1	PANDA_008374	9646	tr|D2HCP0|D2HCP0_AILME; tr|G1MCG0|G1MCG0_AILME	82,497	3	3	3	13,93	22733	7.74	PEBP1_HUMAN	P30086	2.1e-46	0.856	0.9	Phosphatidylethanolamine-binding protein 1 OS=Homo sapiens (Human) GN=PEBP1 PE=1 SV=3	0.598848	0.894248	0.822715	0.819683	0.389658	1.09852	0.766746	0.819683	0.77006	0.224564	29.1619	1.48086	0.876718	1.27449	1.08869	1.57111	0.997761	1.30025	1.27449	1.22712	0.253261	20.6386	0.966922	0.77742	0.00391641	0.0398441	1.3706
1359	D2HMP6_AILME	D2HMP6	tr|D2HMP6|D2HMP6_AILME	D2HMP6_AILME Uncharacterized protein OS=Ailuropoda melanoleuca (Giant panda) GN=LOC100475419 PE=3 SV=1	LOC100475419	9646	tr|D2HMP6|D2HMP6_AILME; tr|D2HNX7|D2HNX7_AILME; tr|D6BQW4|D6BQW4_AILME; tr|Q06BE6|Q06BE6_URSAM	73,953	2	2	2	11,98	25925	7.82	G3P_HUMAN	P04406	1.8e-132	0.955	0.971	Glyceraldehyde-3-phosphate dehydrogenase OS=Homo sapiens (Human) GN=GAPDH PE=1 SV=3	0.598848	0.894248	0.822715	0.819683	0.389658	1.09852	0.766746	0.819683	0.77006	0.224564	29.1619	1.48086	0.876718	1.27449	1.08869	1.57111	0.997761	1.30025	1.27449	1.22712	0.253261	20.6386	0.966922	0.77742	0.00391641	0.0398441	1.3706
1359	HBA_URSMA	P68235	sp|P68235|HBA_URSMA	HBA_URSMA Hemoglobin subunit alpha OS=Ursus maritimus (Polar bear) (Thalarctos maritimus) GN=HBA PE=1 SV=2	HBA	29073	sp|P68235|HBA_URSMA; sp|P68236|HBA_URSTH; sp|P68237|HBA_HELMA	67,136	3	3	3	21,83	15241	8.07	HBA_HUMAN	P69905	3.5e-55	0.845	0.965	Hemoglobin subunit alpha OS=Homo sapiens (Human) GN=HBA1 PE=1 SV=2	0.598848	0.894248	0.822715	0.819683	0.389658	1.09852	0.766746	0.819683	0.77006	0.224564	29.1619	1.48086	0.876718	1.27449	1.08869	1.57111	0.997761	1.30025	1.27449	1.22712	0.253261	20.6386	0.966922	0.77742	0.00391641	0.0398441	1.3706
1359	D2H129_AILME	D2H129	tr|D2H129|D2H129_AILME	D2H129_AILME Putative uncharacterized protein OS=Ailuropoda melanoleuca (Giant panda) GN=PANDA_003186 PE=3 SV=1	PANDA_003186	9646	tr|D2H129|D2H129_AILME; tr|G1M9F0|G1M9F0_AILME	63,987	2	2	2	9,71	22769	7.67	KAD1_HUMAN	P00568	6.6e-86	0.979	0.995	Adenylate kinase isoenzyme 1 OS=Homo sapiens (Human) GN=AK1 PE=1 SV=3	0.598848	0.894248	0.822715	0.819683	0.389658	1.09852	0.766746	0.819683	0.77006	0.224564	29.1619	1.48086	0.876718	1.27449	1.08869	1.57111	0.997761	1.30025	1.27449	1.22712	0.253261	20.6386	0.966922	0.77742	0.00391641	0.0398441	1.3706
1359	D2HC39_AILME	D2HC39	tr|D2HC39|D2HC39_AILME	D2HC39_AILME Uncharacterized protein OS=Ailuropoda melanoleuca (Giant panda) GN=PRDX1 PE=4 SV=1	PRDX1	9646	tr|D2HC39|D2HC39_AILME	53,014	2	2	2	10,61	21979	8.27	PRDX1_HUMAN	Q06830	5e-104	0.99	1	Peroxiredoxin-1 OS=Homo sapiens (Human) GN=PRDX1 PE=1 SV=1	0.598848	0.894248	0.822715	0.819683	0.389658	1.09852	0.766746	0.819683	0.77006	0.224564	29.1619	1.48086	0.876718	1.27449	1.08869	1.57111	0.997761	1.30025	1.27449	1.22712	0.253261	20.6386	0.966922	0.77742	0.00391641	0.0398441	1.3706
						1.35601
